# Supplementary material for: Mapping binary copolymer property space with neural networks
Source: Chem Sci. 2019 Apr 1;10(19):4973–84. doi: 10.1039/c8sc05710a (PMC6530542; doi:10.1039/c8sc05710a)
Supplement: Supplementary file 2 [file SC-010-C8SC05710A-s002.csv]

IP (eV)	EA (eV)	Excitation Energy (eV)	Fundamental Gap (eV)	Exciton Binding Energy (eV)	Monomer1	Monomer2
-6.4060597	-2.442131	2.954139	3.9639287	1.0097897	CC%45(OC)C%46=C(C=CC(Br)=C%46)C%47=C%45C=C(Br)C=C%47	[O-][N+](=O)c1cc(Br)ccc1Br
-6.8773613	-2.7508912	2.7761252	4.12647	1.3503449	C1=CC(=NC(=C1C=O)Br)Br	C1=C(C=NC2=CC(=CN=C21)Br)Br
-6.006676	-1.8255756	2.7200613	4.181101	1.4610395	CC1=C(N=C(C(=N1)N)Br)Br	CC1=CC(=NC(=C1)Br)Br
-6.0676875	-1.1128333	3.3998384	4.954854	1.5550156	COC1=CC(=CC(=C1)Br)Br	C1=CC2=C(C=C1Br)C3=C(O2)C=CC(=C3)Br
-7.1064835	-3.1225386	2.5674138	3.983945	1.4165311	C1=CC(=C(C(=C1Br)C=O)F)Br	O=C%57C%58=C(Br)SC(Br)=C%58C(C%57(F)F)=O
-6.4442163	-1.581701	3.4926887	4.8625154	1.3698268	FC(F)Oc1cc(Br)c(Cl)c(Br)c1	C1=CC=C(C=C1)OC2=CC(=CC(=C2)Br)Br
-5.647896	-1.7274191	2.705535	3.9204767	1.2149417	C1=CC(=NC(=C1Br)Cl)Br	BrC%83=CC(SC%84=CC(Br)=CC%85=C%84N%86C=C%85)=C%86C=C%83
-4.8653173	-1.9964345	1.8796766	2.868883	0.9892063	CCCCC1=C(SC(=C1)Br)Br	BrC(S%13)=CC%14=C%13C(SC(Br)=C%15)=C%15C%14(C)C
-5.681795	-1.6616026	2.6342568	4.0201926	1.3859358	C1=C(C2=NC=C(N2C=C1Cl)Br)Br	BrC4=CC5=C(SC(Br)=C5)S4
-6.679039	-1.135227	3.8516521	5.543812	1.6921597	C1=CC(=C(C=C1Br)Br)Cl	CC1=C(C(=NC=C1Br)C)Br
-7.176899	-2.7954218	3.2608788	4.3814774	1.1205986	C1=C2C(=CC(=C1Br)Br)C(=O)OC2=O	CC1=NC(=CC(=C1)Br)Br
-6.009443	-2.7335155	2.119611	3.2759273	1.1563163	C1=C(SC2=C1SC(=C2)Br)Br	C1(=C(N=C(N1)Br)[N+](=O)[O-])Br
-6.2619114	-2.3940182	2.6835506	3.8678932	1.1843426	CC(=O)C1=C(SC(=C1)Br)Br	BrC1=CC=C(C(C=CC(Br)=C2)=C2B2C3=CC=C(C#N)C=C3)C2=C1
-6.777133	-2.5724149	3.0275772	4.204718	1.177141	COC1=CC(=C(C(=C1)Br)Cl)Br	C1=C(C(=CC(=C1Br)F)Br)[N+](=O)[O-]
-5.179425	-2.478194	1.9270062	2.7012308	0.7742245	CC(=O)C1=C(SC(=C1)Br)Br	COC%31=C%32C(C=C(Br)S%32)=C(OC)C%33=C%31C=C(Br)S%33
-6.6162987	-2.6497664	2.3700814	3.9665322	1.5964508	BrC%93=NN=C(Br)C=N%93	O=S3(=O)c1ccc(Br)cc1c2cc(Br)ccc23
-6.2671003	-1.7531798	3.0276396	4.513921	1.4862812	C1CC(=O)NC2=C(C=C(C=C21)Br)Br	Brc2cccc(c1cccc(Br)n1)n2
-6.287912	-2.2763965	2.8438497	4.0115156	1.167666	C1=CC2=CC(=C(N=C2N=C1)Br)Br	C1=CC2=NNC(=C2C=C1Br)Br
-5.616795	-1.5134978	2.7275891	4.103297	1.3757081	C1=C(C=NC2=C(C=NN21)Br)Br	C1=CC2=C(C=C1Br)C3=C(N2)C=CC(=C3)Br
-6.647767	-1.3459046	3.741813	5.3018627	1.5600498	CCC1=CC(=CC(=C1Br)CC)Br	CC1=NC(=C(C=C1Br)Br)F
-6.2959023	-1.7750584	3.233848	4.520844	1.2869959	C1=CC=C2C(=C1)C(=CC=C2Br)Br	Cc1cc(Br)cc(Br)c1[N+]#[C-]
-6.804657	-2.7460585	2.7114615	4.0585985	1.347137	C1=C(C(=NC=C1Br)Br)F	C1=C(C(=CN=C1Br)Br)C=O
-6.5785003	-1.7208492	3.3443615	4.857651	1.5132897	C1(=C(N=C(N1)Br)Br)C(F)(F)F	C1=CC(=C(C(=C1Cl)Br)Cl)Br
-6.340843	-2.2148132	2.690261	4.12603	1.4357691	C1=CC2=CC(=C(N=C2N=C1)Br)Br	CC1=C(C=C(C(=O)N1C)Br)Br
-6.744571	-2.151458	3.3332205	4.593113	1.2598925	C1=CC(=NC=C1Br)Br	C1=C(C=C(N=C1Br)Br)F
-5.7583585	-1.9112749	2.631041	3.8470836	1.2160425	CC(C)OC1=C(C=C(C=C1C=O)Br)Br	C1CC2=CC(=CC(=C2NC1)Br)Br
-6.701174	-1.2486358	3.8201172	5.452538	1.6324208	CC1=C(C=CC(=C1Cl)Br)Br	CC1=C(C=C(C=N1)Br)Br
-6.764863	-1.9695883	3.243157	4.7952747	1.5521178	C1=C(C(=CC(=C1Cl)Br)Br)F	C1=CC(=NN=C1Br)Br
-6.483367	-1.7563344	3.0990903	4.7270327	1.6279423	CC1=C(C=CN=C1Br)Br	C1=C(C(=C(C(=C1Br)Cl)C#N)N)Br
-6.0240855	-2.1248753	2.678359	3.8992102	1.2208512	CC1=C(C(=NC=C1Br)N)Br	O=C(C1=C(F)C2=C(Br)SC(Br)=C2S1)OC
-6.2133937	-1.9652401	3.2226639	4.2481537	1.0254898	Brc3ccc(c2ccc(c1ccc(Br)cc1)cc2)cc3	C1=CC2=CC(=CN=C2C3=NC=C(C=C31)Br)Br
-6.140856	-2.4858258	2.4254112	3.65503	1.2296188	CC1=CC(=CC(=C1F)Br)Br	CN%66C(C%67=CC%68=C(Br)SC(Br)=C%68C=C%67C%66=O)=O
-6.0564504	-1.5665822	3.1882763	4.489868	1.3015919	C1=C(C=C(C(=C1Br)F)C#N)Br	C1=CC(=C(C=C1Br)N)Br
-6.3014665	-2.0784378	2.8482215	4.2230287	1.3748071	C1=C(C2=NNC(=C2C=N1)Br)Br	C1=CC(=C(C=C1Br)Br)F
-6.607195	-1.77707	3.4122186	4.830125	1.4179063	C1=CC2=NC(=NN2C=C1Br)Br	C1=CN=C(C=C1Br)Br
-5.7057095	-1.2039866	3.045334	4.501723	1.4563887	CC1=CC(=CC(=C1)Br)Br	BrC4=CC5=C(SC(Br)=C5)S4
-6.9341717	-1.3915431	3.8880887	5.5426283	1.6545396	C1=CC(=C(C(=C1F)Br)F)Br	C1=C(C(=C(C=N1)Br)Cl)Br
-7.0729346	-2.9146786	2.804675	4.158256	1.353581	C1=C(N=C(C(=N1)Cl)Br)Br	C1=CC(=NC(=C1C=O)Br)Br
-6.5848436	-1.2412808	3.6916711	5.343563	1.651892	C1=CC(=C(C=C1Br)CC#N)Br	Brc1cncc(Br)c1
-6.750143	-2.14088	2.8021934	4.609263	1.8070695	CC(=O)C1=CC(=CC(=C1NC(=O)C)Br)Br	COCN1C(=NC(=N1)Br)Br
-6.2422194	-2.1891448	2.6505086	4.053075	1.4025662	C1=C(N=CN=C1Br)Br	C1=CN=C(C(=C1Br)N)Br
-7.1412125	-2.1645942	3.4151533	4.9766183	1.561465	C1(=C(C(=C(C(=C1F)Br)F)Br)F)F	BrC1=NOC(Br)=C1
-6.941532	-2.8291662	2.8221521	4.1123657	1.2902136	C1=C(N=CC2=C(NN=C21)Br)Br	C1(=C(NN=C1Br)Br)[N+](=O)[O-]
-6.418294	-1.7072325	3.337534	4.7110615	1.3735275	CC1=CC(=CC(=C1Br)C)Br	C1=CC2=NC=CC(=C2C=C1Br)Br
-7.1581526	-3.0815551	2.6978526	4.076597	1.3787446	COc1c(Br)cc(N(=O)=O)c(C)c1Br	C1=C(C=NC(=C1Br)[N+](=O)[O-])Br
-6.2649765	-2.4334688	2.6393647	3.8315077	1.192143	C1=C(N=CC(=N1)Br)Br	COC1=CC(=C2C(=C1Br)C=CC=N2)Br
-6.7014756	-2.2530208	3.0284154	4.448455	1.4200394	C1=CN=C(C=C1Br)Br	C1=C(N=C(C=N1)Br)Br
-6.8391776	-3.3616233	2.702316	3.4775543	0.7752383	C1=C(C(=C(C=N1)Br)Cl)Br	C1=C(C2=NSN=C2C(=C1F)Br)Br
-7.102143	-2.523368	3.2048995	4.578775	1.3738754	FC(F)Oc1cc(Br)c(Cl)c(Br)c1	CC1=C(C=CC(=C1[N+](=O)[O-])Br)Br
-6.9339647	-2.674625	2.929381	4.25934	1.3299589	C1=C(C(=CC(=C1Br)F)Br)[N+](=O)[O-]	C1=C(C=NC2=CC(=CN=C21)Br)Br
-5.868897	-1.3775442	3.2787666	4.491353	1.2125864	C1=CC(=C(C=C1Br)Br)S	CC%45(OC)C%46=C(C=CC(Br)=C%46)C%47=C%45C=C(Br)C=C%47
-6.7535295	-1.4910893	3.7552254	5.26244	1.5072148	CC1=C(C=C(C=C1F)Br)Br	O=S(OC)(C1=CC(Br)=CC=C1C1=CC=C(Br)C=C1S(OC)(=O)=O)=O
-5.666861	-1.4893546	2.7445629	4.1775064	1.4329436	CC(C)(C)C1=CC(=C(C(=C1)Br)N)Br	C1COC2=C(SC(=C2O1)Br)Br
-6.3258758	-1.9443523	3.3331828	4.3815236	1.0483408	C1=CC(=C(C=C1Br)Br)N=C=S	CC1=CC(=NC=C1Br)Br
-6.1906962	-1.2186649	3.430164	4.9720316	1.5418675	CC1=C(C=C(C=C1Br)N)Br	C1=C(C=NC(=C1Br)F)Br
-5.7239766	-0.9074758	3.2765093	4.8165007	1.5399914	C1=CC2=C(C=C1Br)C3=C(N2)C=CC(=C3)Br	CC1=CC(=CC(=C1F)Br)Br
-5.5593524	-2.082836	2.343897	3.4765165	1.1326194	Br/C=C/C%30=CC=C(Br)S%30	BrC1=NC2=CC=C(Br)C=C2O1
-6.5635595	-2.8168724	2.9078171	3.7466872	0.83887005	COC1=CC(=C(C(=C1)Br)Cl)Br	C1=C2C=C(C=NC2=C(C=C1[N+](=O)[O-])Br)Br
-6.2060814	-2.4586027	2.5555348	3.7474787	1.1919439	C1=CC(=C(C(=C1F)Br)F)Br	C1=CC2=C(C=C1Br)C3=CC(=CC(=C3N2)[N+](=O)[O-])Br
-6.7398787	-2.8814678	2.651943	3.8584108	1.2064679	C1=C(N=CC2=NNC(=C21)Br)Br	C1=C(C(=CN=C1Br)[N+](=O)[O-])Br
-7.152788	-2.6600156	3.0678258	4.4927726	1.4249468	CC1=C(C(=NC=C1Br)Br)[N+](=O)[O-]	CC1=C(C(=C(C=C1)Br)C)Br
-5.816505	-1.7782897	2.8260818	4.038215	1.2121334	C1=CSC(=C1Br)C2=C(C=CS2)Br	C1=C(C2=NC=NN2C=C1Br)Br
-6.383645	-2.5093465	2.444992	3.8742986	1.4293065	C1=C(C(=C(C(=C1Cl)Br)Cl)Br)N	CC1=CC(=C(C(=C1N)Br)[N+](=O)[O-])Br
-6.5322037	-3.3270657	2.5191522	3.205138	0.6859858	C1(=C(C2=NSN=C2C(=C1F)Br)Br)F	C1=C(N=C(N=C1Br)N)Br
-5.763816	-1.3168844	3.117941	4.4469314	1.3289905	CC1=C(N(C(=N1)Br)C)Br	C1=C(C=C2C(=C1Br)C=NN2)Br
-6.0881915	-1.3296595	3.268226	4.758532	1.4903061	C1=C(C=C(C=C1Br)Br)OC(F)F	COC1=C(C=C(C(=C1Br)N)Cl)Br
-5.619783	-1.0307703	3.0441124	4.5890126	1.5449002	CC1=CC(=CC(=C1Br)C)Br	BrC%70=CC=C(Br)N%70C
-6.345809	-1.7239883	3.248944	4.6218204	1.3728764	COC1=C(C=C(C=C1Br)F)Br	C1=C(C(=NC=C1Br)Br)F
-5.9246383	-2.5649214	2.3279424	3.359717	1.0317745	C1=C(C(=C(C(=N1)Br)N)N)Br	FC%71=NC%72C(Br)=CC=C(Br)C%72N=C%71F
-7.050025	-2.2505937	3.041709	4.7994313	1.7577224	C1=CC(=NN=C1Br)Br	C1(=NC(=NN1)Br)Br
-6.476349	-1.3523202	3.567059	5.1240287	1.5569696	CC1=C(C=C(C(=C1Cl)Br)Cl)Br	CC1(C2=CC(=CC(=C2NC1=O)Br)Br)C
-5.858792	-3.122192	2.4539483	2.7366	0.28265166	C1=CC2=C(C=CC3=C2C4=C1C=CC(=C4C=C3)Br)Br	C1=C(C2=NSN=C2C(=C1F)Br)Br
-6.7259197	-2.2854428	3.1067123	4.440477	1.3337646	C1=CN=CC2=C1C(=CC(=N2)Br)Br	C1=CC(=C(C(=C1)Br)CN)Br
-5.9209723	-1.584143	3.2005918	4.336829	1.1362374	C1=CC=C2C(=C1)C3=C(C=CC(=C3)Br)C4=C2C=C(C=C4)Br	C1=CC=C2C(=C1)C3=C(C=CC(=C3)Br)C4=C2C=C(C=C4)Br
-5.6840887	-1.8423775	2.39681	3.841711	1.444901	C1=C(C=C(C=C1Br)Br)C(=S)N	C1=CC(=C2C(=C1Br)C=CN2)Br
-7.085335	-2.5481968	3.1792164	4.537138	1.3579216	C1=C(C=C(C=C1Br)Br)[N+](=O)[O-]	C1=C(C(=CN=C1Br)F)Br
-6.150967	-1.2045169	3.301539	4.94645	1.6449113	CC1=CC(=C(C(=C1Cl)Br)N)Br	C1=C(C=C(C=C1Br)Br)C(F)F
-6.5934205	-2.5728772	2.959103	4.020543	1.06144	CC1=C(C=C(C=C1[N+](=O)[O-])Br)Br	COC%41=CC=CC(C%42=NC(C(Br)=CC=C%43Br)=C%43N=C%42C%44=CC(OC)=CC=C%44)=C%41
-6.77491	-3.5246496	2.3196359	3.2502604	0.9306245	CN(C9=O)C(C%10=C(Br)C=C%11C%12=C(C(N(C)C%11=O)=O)C(Br)=CC9=C%12%10)=O	CC1=NC2=C(N=C1C)C(Br)=CC=C2Br
-6.251621	-1.5444016	3.2134748	4.707219	1.4937444	C1(=C(C(=C(C(=C1Br)Cl)F)Cl)Br)N	CC1(C2=CC(=CC(=C2NC1=O)Br)Br)C
-6.951744	-2.3860083	2.8850272	4.565736	1.6807086	C1=C(C=C(C(=C1Br)Cl)OC(F)(F)F)Br	C1=CC(=C(C(=C1Br)C=O)F)Br
-6.5866957	-2.9440749	1.8627183	3.6426208	1.7799025	CC1=CC(=NC(=C1)Br)Br	C1=C(C=C2C(=C1Br)NC(=O)C2=O)Br
-5.6472187	-1.8300471	2.8059103	3.8171716	1.0112612	C1CCN(CC1)C2=CC(=CC(=C2)Br)Br	C1=CC2=C(C=CC(=N2)Br)C=C1Br
-6.5837255	-2.3250065	2.9128003	4.258719	1.3459187	C1=C(C=C(C(=C1Br)F)Br)F	C1=CC2=NC(=NC=C2C=C1Br)Br
-6.737765	-3.0536346	2.278717	3.6841302	1.4054132	C1=CC(=C(C=C1Br)Br)[N+](=O)[O-]	BrC1=CC=C(Br)S1(=O)=O
-6.7802105	-2.7534113	2.9276502	4.026799	1.099149	C1=CC=C(C=C1)C2=C(C=C(C=C2)Br)Br	C1=C(C(=CN=C1Br)[N+](=O)[O-])Br
-6.5155225	-1.4241542	3.601756	5.091368	1.4896121	C1=C(C(=C(C(=C1F)Br)F)Br)F	Brc1ccc(cc1)c2ccc(Br)cc2
-5.6782784	-1.3477703	2.9711835	4.330508	1.3593247	CC1=C(N(C(=N1)Br)C)Br	CN1C(=CN=C1Br)Br
-5.8244653	-1.0725131	3.3158574	4.751952	1.4360948	C1=C(C(=C(C(=C1Br)F)Br)N)F	CC1=C(C=CC(=C1Br)N)Br
-5.9819317	-1.7136757	3.080808	4.268256	1.1874483	C1=C(C=NC(=C1Br)N)Br	C1=CC2=C(C=C1Br)N=C(S2)Br
-6.1543226	-1.6966913	3.007732	4.457631	1.4498992	C1=C(C=C(C(=C1Br)N)Br)OC(F)F	C1=CN=C(C=C1Br)C2=NC=CC(=C2)Br
-6.283123	-1.9479654	3.0113633	4.3351574	1.3237941	C1(=C(N=C(N1)Br)Br)C(F)(F)F	C1=CC2=C(C=C1Br)N=C(S2)Br
-6.3113003	-1.303324	3.559935	5.0079765	1.4480414	CC1=C(C=C(C=C1Br)OC)Br	CC1=CC(=C(N=C1Br)C)Br
-6.3277874	-2.3725207	2.6393158	3.9552667	1.3159509	C1=C(C=C(C(=C1Br)C=O)F)Br	C1=C2C(=C(C(=C1Br)N)Br)OC(O2)(F)F
-5.98158	-2.1034486	2.6671321	3.8781312	1.210999	C1=C(C=NC2=NNC(=C21)Br)Br	CC1=C(N=C(S1)Br)Br
-6.3225937	-2.9585319	2.5162187	3.3640618	0.84784317	C1=C(C2=NC(=CN=C2N1)Br)Br	C1(=C(C2=NSN=C2C(=C1F)Br)Br)F
-7.047657	-1.7070334	3.844119	5.340624	1.4965048	Cc1cc(Br)cc(Br)c1[N+]#[C-]	C1=C(C(=C(C=N1)Br)Cl)Br
-5.9805136	-1.31004	3.1655393	4.6704736	1.5049343	C1=CC(=C(C(=C1N)Br)F)Br	C1CCOC(C1)N2C(=NC(=N2)Br)Br
-6.5386934	-2.5664349	2.6286466	3.9722586	1.343612	C1=C(C(=C(C(=C1Br)F)Br)N)F	C1=CN=C(C(=C1Br)[N+](=O)[O-])Br
-5.9843283	-1.7001438	3.0603006	4.2841845	1.2238839	C1=C(N=CC2=C(NN=C21)Br)Br	C1CCOC(C1)COC2=C(C=C(C=C2)Br)Br
-6.591144	-1.774319	3.49473	4.816825	1.3220949	C1=CC2=NC(=NN2C=C1Br)Br	C1=C(C(=CC(=C1Cl)Br)Br)F
-6.0493655	-1.5221733	3.123232	4.527192	1.4039602	CC1=C(C=C(C=C1Br)N)Br	C1=C(N=C(N=C1Br)N)Br
-5.858736	-2.838562	2.4143445	3.020174	0.6058295	CC1=C(C(=CC(=C1Cl)Br)Br)N	FC1=C(C2=CC(C)=C(Br)S2)C2=NSN=C2C(C2=CC(C)=C(Br)S2)=C1F
-5.7245674	-2.2522092	2.266154	3.4723582	1.2062042	C1=C(C(=CN=C1Br)Br)N	BrC1=CC(C2(OCCO2)C2=C3SC(Br)=C2)=C3S1
-5.8724666	-1.0385623	3.33496	4.8339043	1.4989443	C1=C(C(=CC(=C1F)Br)Br)F	CC1=C(C(=C(C=C1Br)Br)N)C
-7.1449766	-2.648804	3.1629345	4.496173	1.3332384	C1=C(C(=C(C(=C1F)Br)[N+](=O)[O-])Br)F	CC(C)(C)c1cc(Br)c(C(C)(C)C)cc1Br
-6.260601	-0.8683598	3.7175174	5.3922415	1.6747241	COC1=CC(=CC(=C1)Br)Br	BrCc1ccc(CBr)cc1
-6.6024103	-2.696372	2.7188463	3.9060383	1.187192	C1=CC(=C(C(=C1[N+](=O)[O-])Br)F)Br	CC1=C(N=C(C(=N1)N)Br)Br
-7.8381586	-3.948435	2.8069532	3.8897235	1.0827703	C1=CC(=C(C(=C1)Br)C(F)(F)F)Br	C12=C(C(=C3C(=C1Br)C(=O)OC3=O)Br)C(=O)OC2=O
-6.0959263	-1.2879236	3.1224263	4.8080025	1.6855762	C1=CC(=C(C=C1Br)Br)CC#N	CN1C=C(C=C(C1=O)Br)Br
-6.376869	-1.3768088	3.5450683	5.0000606	1.4549923	CC1=CC(=C(C(=C1)Br)F)Br	COC1=C(C=C(C=N1)Br)Br
-5.9917626	-2.9606118	1.9023125	3.0311508	1.1288383	C1(=C(N=C(N1)Br)[N+](=O)[O-])Br	BrC1=CC(C2(OCCO2)C2=C3SC(Br)=C2)=C3S1
-6.1627474	-1.9541383	2.8982184	4.208609	1.3103907	C1=C(C=C(C(=C1Br)N)Br)F	C1=CC2=C(C=CN=C2C3=NC=CC(=C31)Br)Br
-5.6462226	-2.1079597	2.2904987	3.5382628	1.2477641	C1=CC=C2C(=C1)C(=C3C=CC=CC3=C2Br)Br	Br/C=C/Br
-6.2996397	-2.2004735	2.645772	4.099166	1.4533939	C1=CC2=C(C(=C1)Br)N=C(C=C2)Br	C1=C(C(=C(N=C1C(F)(F)F)Br)N)Br
-5.7935214	-3.0118384	2.1788619	2.781683	0.6028211	COC1=C(C=C(C=C1Br)C(=NO)N)Br	FC1=C(C2=CC(C)=C(Br)S2)C2=NSN=C2C(C2=CC(C)=C(Br)S2)=C1F
-6.3717794	-2.0689778	2.9549208	4.3028016	1.3478808	C1(=C(N=C(N1)Br)Br)C(F)(F)F	C1=CC(=CC2=C1C=CC(=N2)Br)Br
-5.7522683	-1.0467159	3.2601442	4.7055526	1.4454083	C1=C(C=C(C(=C1Br)N)F)Br	Brc3ccc(c2ccc(c1ccc(Br)cc1)cc2)cc3
-6.9202595	-2.5473204	2.821298	4.372939	1.5516412	C1(=C(N=C(N1)Br)[N+](=O)[O-])Br	CC1=C(C(=NC(=C1Br)C)C)Br
-6.577749	-2.4236913	2.8555195	4.1540575	1.298538	C1=C(N2C=C(N=C(C2=N1)Br)Br)Cl	C1=CC(=C(C=C1Br)C=O)Br
-6.2441373	-1.8544317	3.1883264	4.3897057	1.2013793	C1=C(C=C(C(=C1Br)Cl)OC(F)(F)F)Br	COC1=C(C=C(C(=C1Br)N)Cl)Br
-5.8782706	-2.14886	2.6122093	3.7294106	1.1172013	C1=CC2=C(C=C1Br)SC3=C2C=CC(=C3)Br	C1=C(N=C(C(=N1)Br)N)Br
-5.514663	-0.7355362	3.2847726	4.779127	1.4943545	COC1=C(C=C(C=C1)Br)Br	BrC%70=CC=C(Br)N%70C
-7.0116158	-2.438322	3.2188885	4.5732937	1.3544052	C1=C(C=C(C(=C1Br)Cl)F)Br	CC1=C(C=C(C=C1[N+](=O)[O-])Br)Br
-6.1714425	-2.2681682	2.752131	3.9032743	1.1511433	C1=CC(=C(C=C1Br)NN)Br	C1=CC2=NC(=NC=C2C=C1Br)Br
-6.9019337	-1.8564602	3.5785017	5.0454736	1.4669719	C1=C(C=C(N=C1Br)Br)Cl	C1=C(C=C(C(=C1Br)F)Cl)Br
-7.0892797	-2.447544	3.164424	4.6417356	1.4773116	C1=C(C=C(C(=C1Br)Cl)F)Br	BrC%95=NC=NC(Br)=N%95
-6.1236634	-2.2088106	2.5935678	3.9148529	1.321285	BrC%87=C%88C(SC(Br)=C%88)=NC%89=C%87C(F)=C(F)S%89	O=C1C(Br)C2=CC=C(Br)C=C2N1C
-5.8001823	-1.1418092	3.3740249	4.658373	1.284348	CC(C)C1=C(C=CC(=C1)Br)Br	CC1=CC(=C(C(=C1N)Br)F)Br
-6.3980494	-2.914589	2.2533479	3.4834604	1.2301126	CC1=C(C(=NC=C1Br)Br)[N+](=O)[O-]	O=C1N(C)C(C2=CC=C(Br)C=C2)=C2C1=C(C1=CC=C(Br)C=C1)N(C)C2=O
-5.6633706	-1.1505293	3.0925102	4.512841	1.420331	CC1=C(C=NC=C1Br)Br	CC1=C(N=C(N1)Br)Br
-5.702218	-1.319509	2.821262	4.382709	1.5614471	C1=C(C=C(C(=C1Br)N)C#N)Br	C1=C2C(=C(C(=C1Br)N)Br)N=CN2
-5.7518873	-1.34025	2.9129882	4.4116373	1.4986491	C1=C(C=C(C(=C1Br)Cl)F)Br	BrC%83=CC(SC%84=CC(Br)=CC%85=C%84N%86C=C%85)=C%86C=C%83
-6.4622726	-2.1942658	3.1915524	4.268007	1.0764544	C1=C(C=C(C(=C1Br)N=C=S)OC(F)(F)F)Br	C1=CC2=C(C(=C1)Br)OC3=C2C=CC=C3Br
-6.996302	-2.5359054	3.0761154	4.460397	1.3842814	C1=CC(=C(C=C1OC(F)(F)F)Br)Br	C1=CC(=C(C=C1Br)[N+](=O)[O-])Br
-6.3065524	-2.320959	2.7679777	3.9855933	1.2176156	CC1=CC(=C(C(=C1N)Br)Cl)Br	CC1=C(C=CC(=C1[N+](=O)[O-])Br)Br
-6.057849	-1.2482098	3.2412684	4.809639	1.5683706	CC(=O)NC1=C(C=CC(=C1)Br)Br	C1=C(C(=C(C(=C1Br)F)Br)N)F
-5.75546	-2.638224	2.140368	3.117236	0.9768679	C1=C(C=C(N2C1=CN=C2)Br)Br	O=CC%73=CC(S%74)=C(S%73)C%75=C%74C(Br)=C(C(SC(C=O)=C%76)=C%76S%77)C%77=C%75Br
-5.84213	-1.2386183	3.2033	4.603512	1.4002118	COC1=C(C=C(C(=C1)N)Br)Br	C1=C(C(=C(C(=C1Br)N)Br)F)F
-6.3100176	-1.8899904	3.0247672	4.4200273	1.3952601	C1=CC(=C(C(=C1)Br)C(F)(F)F)Br	Brc1sc(Br)cc1
-7.3292584	-3.1952853	2.6546526	4.133973	1.4793205	C12=C(SC(=C1C(=O)OC2=O)Br)Br	C1=CN=C(C(=C1Br)C=O)Br
-6.1718373	-1.195919	3.403803	4.9759183	1.5721152	C1COC2=CC(=CC(=C2C1N)Br)Br	BrC#CC#CBr
-7.024486	-3.17347	2.6776738	3.851016	1.1733422	C1=C(C=C(N=C1Br)Br)C=O	COC1=C(N=C(C(=C1)[N+](=O)[O-])Br)Br
-5.4803452	-0.9687999	3.181879	4.511545	1.3296661	CC1=CC(=C(C=C1Br)Br)N	C1=C2C(=CN=C1Br)C(=CN2)Br
-5.8892183	-1.8611336	2.609348	4.0280848	1.4187367	CC1=C(N=C(C(=N1)N)Br)Br	CN(C)C1=NC=C(N=C1Br)Br
-6.3834815	-2.196554	2.8626232	4.186928	1.3243046	C1=CC2=CC(=CN=C2C3=NC=C(C=C31)Br)Br	C1=C(C(=C(N=C1C(F)(F)F)Br)N)Br
-7.0655346	-2.6359892	2.7479258	4.4295454	1.6816196	C1=C(C=C(C(=C1Br)C=O)Br)F	C1=C(C(=CN=C1Br)F)Br
-5.5777726	-1.7907088	2.5710218	3.7870638	1.216042	C1=CN2C=C(C=C(C2=N1)Br)Br	BrC%34=CC%35=C(Br)SC=C%35S%34
-5.911987	-2.1255608	2.4104102	3.786426	1.3760159	C1C2=CC(=CC(=C2NC1=O)Br)Br	O=C1N(C)C(C2=CC=C(Br)C=C2)=C2C1=C(C1=CC=C(Br)C=C1)N(C)C2=O
-6.22328	-2.2884529	2.6604383	3.934827	1.2743888	CN=[N+](C1=CC(=CC(=C1N)Br)Br)[O-]	COC1=C(C=C(C=C1Br)C=O)Br
-6.2101917	-1.2966739	3.3655574	4.913518	1.5479605	COC1=CC(=C(C(=C1)Br)Cl)Br	C1=C(C(=C(C(=C1Br)F)Br)N)Cl
-6.000646	-0.9550909	3.4669557	5.045555	1.5785995	C1=CC(=C(C=C1Br)S)Br	BrCc1ccc(CBr)cc1
-5.7704062	-2.8854141	2.2830343	2.8849921	0.6019578	CC(C)C1=C(C=CC(=C1)Br)Br	FC1=C(C2=CC(C)=C(Br)S2)C2=NSN=C2C(C2=CC(C)=C(Br)S2)=C1F
-5.6438103	-1.4774485	2.8993304	4.166362	1.2670314	CC1=C(C=C(S1)Br)Br	Oc1ccc2cc(Br)ccc2c1c3c(O)ccc4cc(Br)ccc34
-6.4413424	-3.326548	1.8814799	3.1147943	1.2333144	CC1=CC(=C(C=C1Br)Br)OC	O=c1cc(Br)c(=O)cc1Br
-6.851447	-2.2720115	3.1046746	4.5794353	1.4747608	C1(=C(C(=C(C(=C1Br)F)F)Br)F)F	COC1=C(C=C(C=C1Br)C=O)Br
-6.915677	-3.5063412	2.6346495	3.4093359	0.77468634	C1=CC=C(C=C1)COC2=C(C=C(C=N2)Br)Br	BrC1=C([N+]([O-])=O)C([N+]([O-])=O)=C(Br)C2=NSN=C12
-6.2848854	-1.5450306	3.2608192	4.739855	1.4790356	CC(C)(C)C(=O)NC1=CC(=CC(=C1)Br)Br	CC1=CC(=C(N=C1Br)Br)C
-6.106244	-1.2073706	3.192205	4.8988733	1.7066684	CCC1=C(C=C(C=N1)Br)Br	CS(=O)(=O)C1=CC(=C(C(=C1)Br)N)Br
-6.9145365	-2.4752276	2.8614779	4.439309	1.5778313	C1=C(C=C(C(=C1Br)C=O)F)Br	C1=CC(=NC(=C1F)Br)Br
-6.8864503	-2.5569773	3.0233688	4.329473	1.3061042	C1=C(C(=C(C(=C1F)Br)[N+](=O)[O-])Br)F	C1=CC2=C(C=CN=C2C=C1Br)Br
-6.3991246	-2.4014835	2.801989	3.997641	1.195652	C1=C(C(=C(C(=C1Br)F)Br)N)F	C1=CN=C(C2=C1N=C(S2)Br)Br
-7.3016357	-2.9148707	2.7901404	4.386765	1.5966246	C1=CC2=CC(=C(N=C2N=C1)Br)Br	C1=CN=C(C(=C1Br)[N+](=O)[O-])Br
-6.437024	-1.9297739	2.8232424	4.5072503	1.6840079	C1=C(C(=CN=C1Br)Br)N	CC1=CC(=NN=C1Br)Br
-5.7189007	-1.2985897	3.005296	4.420311	1.415015	CN1C(=C(N=C1Br)C#N)Br	C1=CC2=C(C=C1Br)C3=C(N2)C=CC(=C3)Br
-6.6442385	-3.68189	2.3640904	2.9623485	0.598258	C1=CC(=C(C=C1Br)NN)Br	BrC1=C([N+]([O-])=O)C([N+]([O-])=O)=C(Br)C2=NSN=C12
-6.6721745	-2.6208708	2.7354577	4.051304	1.3158462	C1=C(C=NC(=C1Br)C#N)Br	CC(=O)C1=C(SC(=C1)Br)Br
-5.658928	-1.1005741	3.2211099	4.558354	1.337244	COC1=CC(=CC(=C1N)Br)Br	C1CCOC(C1)COC2=C(C=C(C=C2)Br)Br
-5.9139576	-1.6476989	2.9402678	4.2662587	1.3259909	C1=C(C=C(C=C1Br)Br)C#N	BrC4=CC5=C(SC(Br)=C5)S4
-6.0347	-1.373039	3.189208	4.661661	1.4724531	CC1=CC(=C(C(=C1Cl)Br)N)Br	BrC1=CC=C2C3=CC=C(Br)C=C3OC2=C1
-6.2870502	-2.2301688	2.8299322	4.0568814	1.2269492	C1=CC=C2C(=C1)C=C(N=C2Br)Br	BrC%94=NC=CC(/C=C/Br)=N%94
-5.7684026	-1.9168167	2.593015	3.8515859	1.2585709	CN(CC1=CC(=CC(=C1N)Br)Br)C2CCCCC2	CN1C=C(N=C(C1=O)Br)Br
-6.4890394	-1.1882225	3.6517615	5.300817	1.6490555	CCC1=C(C=CC(=C1)Br)Br	C1=CC(=C(C(=C1)Br)F)Br
-7.345121	-2.9750872	3.1119065	4.3700337	1.2581272	C1=C(C(=CC(=C1Br)C(=O)Cl)Br)C(=O)Cl	C1=CN=C(C=C1Br)Br
-5.9613495	-2.5846295	2.297466	3.37672	1.0792539	CC1(C2=CC(=CC(=C2NC1=O)Br)Br)C	BrC%23=C%24C(N=C(C%25=N%24)C%26=CC=CC%27=CC=CC%25=C%27%26)=C(Br)S%23
-6.0476027	-1.8111055	2.8927505	4.236497	1.3437464	C1=CC(=C(C(=C1)Br)C2=C(N=C3C(=C2)C=NC(=N3)N)N)Br	C1=C(C(=C(C(=N1)Br)N)N)Br
-6.1834636	-2.1911073	2.7514167	3.9923563	1.2409396	C1=CC(=C(C=C1Br)C(F)(F)F)Br	BrC#CC#CBr
-6.697518	-2.4635243	3.105349	4.2339935	1.1286445	C1=C(C=C(C=C1Br)Br)C(=O)Cl	C1=C(N=C(N=C1Br)N)Br
-6.398576	-2.4738927	2.3270197	3.924683	1.5976634	C1=C(C=C(C(=C1Br)Cl)Cl)Br	CC1=CC(=C(C(=C1N)Br)[N+](=O)[O-])Br
-5.885283	-1.1796098	3.0738914	4.705673	1.6317818	CC1=CC(=CC(=C1N)Br)Br	C1=CC(=[N+](C(=C1)Br)[O-])Br
-6.879302	-2.3230867	2.9390793	4.5562153	1.617136	C1(=C(C(=C(C(=C1F)Br)F)Br)F)F	CC1=CC(=NN=C1Br)Br
-6.2327013	-2.032403	2.9720829	4.2002983	1.2282155	C1(=C(C(=C(C(=C1Br)Cl)F)Cl)Br)N	CC1=C(N=C(S1)Br)Br
-6.652758	-2.4150484	2.8901675	4.23771	1.3475425	C1=CN=C2C=C(C=NC2=C1Br)Br	N#CCS(=O)(C1=CC(Br)=CC=C1Br)=O
-6.921091	-2.9536567	2.8934424	3.9674344	1.073992	CC(C)OC1=C(C=C(C=C1Br)F)Br	C1=C(C(=CC(=C1Br)C(=O)Cl)Br)C(=O)Cl
-6.0217724	-1.3552141	3.263357	4.6665583	1.4032013	C1=C(C=C(C(=C1Br)N)Br)C(F)(F)F	C1=CC=C(C=C1)C2=CC(=CC(=C2)Br)Br
-6.8455334	-2.7369187	2.6485772	4.108615	1.4600377	C1=CC(=C(C(=C1Br)F)Cl)Br	O=C%59C%60=C(Br)SC(Br)=C%60C(N%59C)=O
-6.019224	-1.6530489	2.8114429	4.366175	1.5547323	C1=C(C=C(C(=C1Br)N)Br)OC(F)F	C1=CC(=NC(=C1F)Br)Br
-6.6337276	-1.7906175	3.5580292	4.84311	1.2850809	C1=CC(=C(C=C1Br)C#N)Br	C1=CC=C(C(=C1)Br)Br
-5.7454414	-1.8342555	2.5888119	3.911186	1.3223741	CC1=CC(=CC(=C1F)Br)Br	BrC%96=CC(C%97(SCCS%97)C%98=C%99SC(Br)=C%98)=C%99S%96
-6.63058	-2.5029945	2.7808576	4.1275854	1.3467278	C1=CN=C2C=C(C=NC2=C1Br)Br	Brc2cccc(c1cccc(Br)n1)n2
-5.2152343	-1.2460499	2.5619054	3.9691844	1.407279	BrC%83=CC(SC%84=CC(Br)=CC%85=C%84N%86C=C%85)=C%86C=C%83	BrC#CBr
-5.3367577	-1.1945151	2.7727404	4.1422424	1.3695021	C1=C(C=C(C=C1Br)Br)F	BrC%53=CC=C%54C(N(C)C%55=C%54N(C)C%56=CC(Br)=CC=C%55%56)=C%53
-6.503411	-3.1843343	2.770645	3.3190765	0.54843163	C1=CC2=CC(=CN=C2C3=NC=C(C=C31)Br)Br	C1=C(C2=NSN=C2C(=C1F)Br)Br
-5.8648353	-1.2625372	3.2491727	4.602298	1.3531251	C1=C(C=C(C(=C1Br)N)OC(F)F)Br	COC1=C(C=C(C=N1)Br)Br
-6.7107987	-1.2214994	3.822562	5.4892993	1.6667373	CC1=C(C=CC(=C1F)Br)Br	CC1=C(C=CC(=C1Cl)Br)Br
-6.7028737	-1.6852357	3.5135467	5.017638	1.5040915	Cc1cc(Br)cc(Br)c1[N+]#[C-]	CC1=CC(=CC(=C1F)Br)Br
-5.930749	-1.9227451	2.6774752	4.0080037	1.3305285	CCC1=CC(=C(C(=C1)Br)N)Br	C1=CC(=C(C=C1Br)Br)C=O
-5.9693756	-1.2444681	3.2480285	4.7249074	1.4768789	C1=C(C=C(C(=C1F)Br)F)Br	CN1C=C(N=C1Br)Br
-5.977435	-1.9179021	2.8004756	4.059533	1.2590575	C1=CC(=NC(=C1Br)N)Br	C1=CC(=C2C=NC=CC2=C1Br)Br
-6.001719	-1.4858956	3.1057498	4.5158234	1.4100735	C1=CC(=C(C(=C1Br)F)Cl)Br	CCOC1=C(N=C(C(=C1)N)Br)Br
-6.0573945	-1.0165852	3.3749883	5.040809	1.6658208	C1=CC(=C(C=C1Br)Br)CC#N	CC1=NC(=C(C=C1Br)Br)N
-5.8905997	-2.4360068	2.5034645	3.454593	0.9511285	C1=CC(=C(C=C1Br)NN)Br	C1=CC2=C(C=C1Br)C3=CC(=CC(=C3N2)[N+](=O)[O-])Br
-5.9244184	-2.368453	2.6935148	3.5559654	0.8624506	C1=CC2=C(C=C1Br)SC(=N2)Br	BrC%90=C(F)C%91=C(C(SC(Br)=C%92F)=C%92S%91)S%90
-5.802677	-1.8614177	2.7825186	3.9412594	1.1587408	C1=CC2=C(C=C1Br)C3=C(N2)C=CC(=C3)Br	C1(=NN=C(S1)Br)Br
-6.418162	-2.3163128	2.6799316	4.101849	1.4219174	CN1C(=NC(=N1)Br)Br	CC1=NC2=C(N=C1C)C(Br)=CC=C2Br
-6.2063274	-1.323869	3.2902298	4.8824587	1.5922289	Cc1cc(Br)cc(Br)c1[N+]#[C-]	C1=C(C(=C(C=N1)Br)N)Br
-5.91274	-2.2340312	2.686724	3.678709	0.9919851	C1=CC(=C(C=C1Br)Br)N	C1=CC(=C(C=C1Br)[N+](=O)[O-])Br
-5.850569	-1.9835323	2.6011114	3.8670363	1.2659249	C1=C(C(=C(C(=N1)Br)N)N)Br	CC(=O)C1=C(SC(=C1)Br)Br
-5.974902	-1.1995168	3.3131392	4.7753854	1.4622462	Cc1cc(Br)cc(Br)c1[N+]#[C-]	CC1=C(N=C(N1C)Br)Br
-5.9241347	-1.6941782	2.8035808	4.2299566	1.4263759	N#CC(C#N)C3c1cc(Br)ccc1c2ccc(Br)cc23	CC1=C(C=C(C(=O)N1C)Br)Br
-6.470949	-2.2919252	2.8278885	4.1790237	1.3511353	CC1=C(N=C(C(=N1)N)Br)Br	C1COC2=CC(=CC(=C2C1=O)Br)Br
-6.4380817	-2.366519	2.8591702	4.071563	1.2123926	C1=C(C=NC2=NNC(=C21)Br)Br	C1=C(C=NC(=C1Br)C#N)Br
-5.9343657	-1.3022794	3.2261436	4.6320863	1.4059427	CC1=CC(=C(C(=C1)Br)C)Br	CC1=CC(=C(N=C1Br)Br)N
-7.039136	-2.4587603	3.1551018	4.5803757	1.4252739	O=S(OC)(C1=CC(Br)=CC=C1Br)=O	[O-][N+](=O)c1cc(Br)ccc1Br
-5.6443453	-1.7411232	2.9242053	3.903222	0.9790168	C1=CC2=C(C=CC3=C2C4=C1C=CC(=C4C=C3)Br)Br	CC1=C(SC(=C1Br)C)Br
-5.702072	-1.9341707	2.3844066	3.7679014	1.3834949	C1=C(C(=NC=C1Br)Br)N	BrC%61=C%62C(F)=CSC%62=C(Br)S%61
-6.971551	-3.4096599	2.594651	3.561891	0.9672401	C1(=C(C2=NSN=C2C(=C1F)Br)Br)F	C1=C(C(=CC(=C1Br)C=O)Br)C=O
-6.0307407	-2.4545736	1.4565523	3.576167	2.1196148	CS(=NC1=C(C=C(C=C1[N+](=O)[O-])Br)Br)(=O)C	BrC%28=NC%29=C(N=C(Br)S%29)S%28
-6.7885213	-1.7985506	3.5713189	4.9899707	1.4186518	C1=CC(=C(C(=C1)Br)C(F)(F)F)Br	CC1=NC(=CC(=C1)Br)Br
-6.325311	-2.1357484	2.9611862	4.189563	1.2283766	CC1=CN2C=C(N=C(C2=N1)Br)Br	C1=CC(=CC2=C1C=CC(=N2)Br)Br
-5.8972034	-2.1033387	2.4831316	3.7938647	1.3107331	C1=CC=C2C(=C1)C(=C3C=CC=CC3=C2Br)Br	C1=C(C(=NN=C1Br)N)Br
-6.4839582	-1.4895343	3.5220084	4.994424	1.4724154	C1=CC(=C(C=C1Br)Br)C(F)(F)F	C1=CC2=C(C=C1Br)C3=C(O2)C=CC(=C3)Br
-6.8397503	-2.8688211	2.6677856	3.9709291	1.3031435	CC(C)OC1=C(C=C(C=C1C=O)Br)Br	C1(=C(SC(=C1[N+](=O)[O-])Br)Br)[N+](=O)[O-]
-5.4373474	-1.4361271	2.6810722	4.00122	1.320148	C1=CC(=C(C(=C1N)Br)F)Br	BrC(S%13)=CC%14=C%13C(SC(Br)=C%15)=C%15C%14(C)C
-6.4124827	-2.0201921	2.9930737	4.3922906	1.3992169	CN1C(=C(N=C1Br)C#N)Br	C1=CC(=C2C=NC=CC2=C1Br)Br
-5.9022446	-1.3850211	3.3046632	4.5172234	1.2125602	CC1=CC(=C(C(=C1Br)C)Br)N	COC%48(OC)C%49=C(C=CC(Br)=C%49)C%50=C%48C=C(Br)C=C%50
-6.4472103	-2.1173947	2.88266	4.329816	1.447156	CC1=C(C=C(C=C1Br)S(=O)(=O)C(F)(F)F)Br	BrC%87=C%88C(SC(Br)=C%88)=NC%89=C%87C(F)=C(F)S%89
-7.081566	-2.7261927	2.7792432	4.3553734	1.5761302	C1=C(C(=CC(=C1Br)C=O)Br)C=O	C1=CC(=C(C(=C1)Br)C(F)(F)F)Br
-6.633607	-2.3310618	2.8532019	4.302545	1.4493432	C1=CC(=C(C(=C1Br)C=O)F)Br	C1=C(C2=NC=NN2C=C1Br)Br
-6.121381	-1.334918	3.2615716	4.786463	1.5248911	COC1=C(C=C(C=C1Br)F)Br	C1=C(C=C(N=C1Br)Br)N
-6.5716853	-2.332839	2.9579873	4.2388463	1.280859	CC1=C(N=C(S1)Br)Br	C1=C(C=NC(=C1Br)C#N)Br
-6.563559	-1.5023499	3.5766304	5.061209	1.4845788	C1=C(C=C(C=C1Br)Br)OC(F)F	CC1=CC(=C(N=C1Br)C)Br
-5.9249735	-2.4170208	2.3200498	3.5079527	1.1879029	CCC1=CC(=CC(=C1)Br)Br	O=C(C1=C(F)C2=C(Br)SC(Br)=C2S1)OC
-5.8963375	-1.6805876	2.8104792	4.2157497	1.4052706	C1=C(C2=NC=C(N2C=C1Cl)Br)Br	C1=CC2=C(C(=C1)Br)SC3=C2C=CC=C3Br
-6.423625	-2.123456	2.8876328	4.300169	1.4125361	C1=CC(=C(C=C1Br)Br)C(=O)N	C1=C(N=C(C(=N1)Br)N)Br
-6.1727953	-2.1708698	1.6345928	4.0019255	2.3673327	CS(=NC1=C(C=C(C=C1[N+](=O)[O-])Br)Br)(=O)C	COC1=C(C=C(C=C1C#N)Br)Br
-6.0882053	-1.7192878	3.0360332	4.3689175	1.3328843	COC1=C(C(=CC(=N1)Br)Br)N	C1=C(C=C(C(=C1Br)Cl)C(F)(F)F)Br
-6.022649	-2.3098207	2.3918273	3.7128282	1.3210008	C1=CC=C(C=C1)C(=S)NC2=C(C=CC(=C2)Br)Br	C1=CC2=C(C=C1Br)N=C(S2)Br
-5.8636193	-1.4466177	2.873573	4.4170017	1.5434287	C1=C(C(=CC(=C1Cl)Br)Br)F	C1=C(C=C2C(=C1Br)C(=NN2)N)Br
-7.371603	-3.3317564	2.7612543	4.0398464	1.2785921	C1=C(C(=C(C(=C1F)Br)[N+](=O)[O-])Br)F	C12=C(SC(=C1C(=O)OC2=O)Br)Br
-6.893071	-3.6295142	2.1482654	3.263557	1.1152916	C1=CC(=C(C(=C1Cl)Br)Cl)Br	O=C(N1)C2=C3C(C4=C(Br)C=C3C1=O)=C(C1=C3C(C5=CC=C34)=C(C(NC5=O)=O)C=C1Br)C=C2
-5.939825	-2.548626	2.7662835	3.391199	0.6249156	C1=CNC2=CC(=CC(=C21)Br)Br	C1=C2C=C(C=NC2=C(C=C1[N+](=O)[O-])Br)Br
-6.352036	-1.9421661	3.051571	4.40987	1.3582993	CC1=CC(=C(C=C1Br)Br)C	BrC%94=NC=CC(/C=C/Br)=N%94
-5.834354	-1.3909655	2.9494414	4.4433885	1.493947	COc1c(Br)cc(Cl)cc1Br	C1=C2C(=C(C(=C1Br)N)Br)N=CN2
-7.2203054	-2.637586	3.141285	4.5827193	1.4414344	CCC1=C(C=C(C=N1)Br)Br	C1(=C(NN=C1Br)Br)[N+](=O)[O-]
-6.69041	-2.0332594	3.3425703	4.6571507	1.3145804	CC1=CC(=C(C(=C1)Br)C)Br	C1(=NN=C(S1)Br)Br
-6.275287	-2.5908256	2.5560749	3.6844616	1.1283867	C1=C(C(=C(C(=C1Br)F)[N+](=O)[O-])Br)F	CC(C)(C)C1=CC(=C(C(=C1)Br)N)Br
-5.7921524	-1.9315838	2.7778606	3.8605685	1.0827079	[C-]#[N+]c1ccc(Br)cc1Br	CC(C)(C)c1cc2ccc3c(Br)cc(Br)c4ccc(c1)c2c34
-5.7706122	-1.575661	2.7962554	4.194951	1.3986957	C1CC2=C(C(=CC(=N2)Br)Br)NC1	CC1=C(C=CC(=N1)Br)Br
-6.5828137	-1.3977594	3.6569607	5.1850543	1.5280936	CC1=C(C=CN=C1Br)Br	C1=CC=C(C=C1)C2=CC(=CC(=C2)Br)Br
-6.5137715	-1.3727276	3.7334785	5.1410437	1.4075651	C1=CC(=C(C(=C1Br)Cl)Cl)Br	C1=CC=C(C=C1)C2=CC(=CC(=C2)Br)Br
-7.0715613	-3.5134845	2.5314195	3.5580769	1.0266573	C1(=C(N=C(N1)Br)Br)C(F)(F)F	BrC1=C([N+]([O-])=O)C([N+]([O-])=O)=C(Br)C2=NSN=C12
-5.5936704	-1.0562265	3.2409995	4.537444	1.2964447	COC1=C(C=C(C(=C1)N)Br)Br	C1=C(C(=CC(=C1F)Br)Br)N
-6.0392084	-1.9922707	2.669885	4.046938	1.377053	C1=C(C=NN=C1Br)Br	CCOC1=C(N=C(C(=C1)N)Br)Br
-6.6818523	-2.637292	2.680519	4.0445604	1.3640413	C1=C(C=C(C=C1Br)Br)C(F)(F)F	C1=C(N2C(=NC=N2)C(=N1)Br)Br
-5.7755165	-1.2345943	3.2182832	4.540922	1.322639	C1=C(C=C(C(=C1Br)N)Br)C(F)(F)F	CC1=CC(=CC(=C1N)Br)Br
-6.2709255	-2.428372	2.9419422	3.8425536	0.9006114	CC1=CC(=C(C=C1Br)Br)OC	C1=C(C=C(C=C1Br)Br)[N+](=O)[O-]
-5.9875865	-2.7755787	2.0783079	3.2120078	1.1336999	BrC1=CC2=CC=C3C(N=CC(Br)=C3)=C2N=C1	O=C1N(C)C2=CC(Br)=CC=C2/C1=C/C=C1C2=CC=C(Br)C=C2N(C)C/1=O
-6.284035	-1.7775394	3.0188339	4.506496	1.4876621	C1=C(C(=C(C(=C1Br)F)C#N)N)Br	C1=CC(=NC(=C1Br)Cl)Br
-5.9101186	-1.8262521	2.7171202	4.0838666	1.3667464	CC1=CC(=C(C(=C1C)Br)N)Br	CN1C=C(N=C(C1=O)Br)Br
-6.692351	-3.3391523	2.31355	3.3531985	1.0396485	C1(=C(N=C(C(=N1)Cl)Br)Br)N	CN(C9=O)C(C%10=C(Br)C=C%11C%12=C(C(N(C)C%11=O)=O)C(Br)=CC9=C%12%10)=O
-5.6617107	-1.0705309	3.2735977	4.59118	1.3175821	COC1=CC(=CC(=C1)Br)Br	CN(CC1=CC(=CC(=C1N)Br)Br)C2CCCCC2
-6.434604	-1.7149944	3.4542322	4.7196097	1.2653775	N#CC(C#N)C3c1cc(Br)ccc1c2ccc(Br)cc23	CC1=NC(=C(C=C1Br)Br)Cl
-5.8063097	-1.3242557	3.1926842	4.4820538	1.2893696	C1=C(C=C2C=NNC2=C1Br)Br	C1=C(C2=C(S1)C(=CS2)Br)Br
-6.6944013	-2.836165	2.7845545	3.8582363	1.0736818	C1=C(C(=CN=C1Br)Br)[N+](=O)[O-]	C1=CC=C(C=C1)C2=NC3=C(C=CC(=C3S2)Br)Br
-5.8217516	-1.4139752	2.968846	4.4077764	1.4389303	CC1=C(C(=CC(=C1F)Br)Br)N	C1=C(N=C(N=C1Br)N)Br
-6.808255	-3.0341177	1.915122	3.7741375	1.8590155	CC1=C(C=CC(=C1[N+](=O)[O-])Br)Br	CCN1C2=C(C=C(C=C2C(=O)C1=O)Br)Br
-6.2011285	-1.176137	3.2511997	5.0249915	1.7737918	CC1=C(C(=C(C=C1F)Br)N)Br	C1=C(C=C(C(=C1Br)Cl)Br)Cl
-6.096315	-1.289107	3.2666893	4.807208	1.5405188	CC1=C(C=CC(=C1C)Br)Br	C1=C(C=C(N=C1N)Br)Br
-5.9794054	-2.0712054	2.511593	3.9082	1.3966069	CC(=S)NC1=C(C=CC(=C1)Br)Br	C1=CN=C(N=C1Br)Br
-6.5165935	-1.9129139	3.3419688	4.6036797	1.2617109	C1(=C(C(=C(C(=C1F)F)Br)F)F)C2=C(C(=C(C(=C2F)F)Br)F)F	C1CC(=O)NC2=C(C=C(C=C21)Br)Br
-6.078594	-1.5116642	3.2130148	4.56693	1.353915	CCC1=CC(=C(C(=C1)Br)N)Br	C1=CC=C(C=C1)C(=O)NC2=C(C=CC(=C2)Br)Br
-5.589859	-1.6610358	2.7670872	3.9288232	1.161736	C1=CC2=NC=CC(=C2C=C1Br)Br	C1CC2=CC(=CC(=C2NC1)Br)Br
-6.574093	-1.701101	3.5775533	4.872992	1.2954388	CC1=C(C=CC(=C1)Br)Br	C1=C(C(=NC=C1Br)Br)Cl
-6.5737557	-1.2123961	3.7800264	5.3613596	1.5813332	CC(C)C1=CC(=CC(=C1Cl)Br)Br	CC1=C(C(=C(C(=C1Br)C)C)Br)C
-5.760584	-1.399397	2.832641	4.361187	1.5285461	C1=C2C(=C(C(=C1Br)N)Br)N=CN2	C1=CC(=C2C(=C1Br)N=CC=N2)Br
-6.16283	-1.9284003	3.0063741	4.2344294	1.2280552	Cc3ccc(c2ccc1cc(Br)cc(Br)c1n2)cc3	C1=C(C(=NC(=C1Br)Cl)N)Br
-6.7552547	-2.3720145	3.043006	4.38324	1.3402343	C1=CC(=C(C=C1Br)N=C=S)Br	BrC%95=NC=NC(Br)=N%95
-5.399116	-1.7148273	2.5432868	3.6842887	1.1410019	C1CCN(CC1)C2=CC(=CC(=C2)Br)Br	Br/C=C/C%30=CC=C(Br)S%30
-6.2607913	-2.5209363	2.2533069	3.739855	1.4865482	CC1=NC(=C(C(=C1)Br)N)Br	BrC%93=NN=C(Br)C=N%93
-6.232068	-2.572955	2.346158	3.6591132	1.3129551	Brc3ccc(c2ccc(c1ccc(Br)cc1)cc2)cc3	C1=C(C2=NON=C2C(=C1)Br)Br
-6.313401	-2.9365163	2.825956	3.376885	0.55092883	C1(=C(C2=NSN=C2C(=C1F)Br)Br)F	C1COC2=CC(=CC(=C2C1N)Br)Br
-6.749567	-1.7387304	3.7050467	5.0108366	1.30579	CC1=C(C=C(C=C1F)Br)Br	C1=CC(=C(C=C1OC(F)(F)F)Br)Br
-6.334095	-3.9099302	1.6793358	2.4241648	0.74482894	C12=C(C3=NSN=C3C(=C1N=S=N2)Br)Br	O=n1cc(Br)ccc1Br
-7.4577227	-3.5329278	2.82095	3.924795	1.1038449	C1=C(C(=CC(=C1Br)C(=O)Cl)Br)C(=O)Cl	C(=O)C1=C(N=C(S1)Br)Br
-6.2302713	-1.7426814	3.3963876	4.48759	1.0912023	C1=CC2=C(C=C1Br)S(=O)(=O)C3=C2C=CC(=C3)Br	C1COC2=CC(=CC(=C2C1N)Br)Br
-5.9256597	-1.7187555	3.006342	4.2069044	1.2005625	C1COCCN1C2=CC(=CC(=C2)Br)Br	COC(=O)C1=C(C=C(C=C1)Br)Br
-5.9018583	-1.2627859	3.1948738	4.6390724	1.4441986	C1=C(C(=CC(=C1F)Br)Br)N	C1=CC2=C(C(=C1)Br)OC3=C2C=CC=C3Br
-6.5227437	-1.7082844	3.3977787	4.8144593	1.4166806	C1=C(C=C(C(=C1Br)Cl)F)Br	C1=CC2=C(C(=C1)Br)OC3=C2C=CC=C3Br
-7.699666	-3.8152595	2.6452918	3.8844066	1.2391148	C1=CC(=C(C=C1Br)Br)C(F)(F)F	C12=C(C(=C3C(=C1Br)C(=O)OC3=O)Br)C(=O)OC2=O
-6.441449	-2.3742738	2.7823734	4.0671754	1.284802	CCOC1=C(C=C(C=C1Br)F)Br	C1=CC=C2C(=C1)C(=NC(=N2)Br)Br
-6.4655166	-2.6642594	2.5210419	3.8012571	1.2802153	CC(=O)NC1=CC(=C(C=C1Br)[N+](=O)[O-])Br	CN1C(=CN=C1Br)Br
-6.5258846	-3.2886748	2.3594275	3.2372098	0.87778234	C1=C(C(=C(C(=N1)N)Br)C(F)(F)F)Br	O=C(N1)C2=C3C(C4=C(Br)C=C3C1=O)=C(C1=C3C(C5=CC=C34)=C(C(NC5=O)=O)C=C1Br)C=C2
-5.8896556	-1.3292894	3.1866727	4.560366	1.3736935	CC1=C(N(C(=N1)Br)C)Br	COC1=C(C=C(C=N1)Br)Br
-5.814996	-0.97497094	3.2048876	4.840025	1.6351373	C1=CC(=C(C=C1Br)Br)F	C1COCCN1C2=CC(=CC(=C2)Br)Br
-6.0496063	-2.1732745	2.678578	3.8763318	1.1977539	C1=CC(=C2C(=C1Br)C=NN2)Br	C1=CC2=C(C(=C1)Br)N=C(C=C2)Br
-5.8299265	-1.338443	2.8969004	4.4914837	1.5945833	C1=CN2C=C(C=C(C2=N1)Br)Br	C1=C(C(=C(C(=N1)Br)N)N)Br
-5.95091	-1.3934876	3.11084	4.5574226	1.4465826	C1=C(C(=C(C=N1)Br)N)Br	CC1=CC(=C(N=C1Br)Br)N
-6.459446	-1.2761807	3.5814312	5.183265	1.601834	CC1=NC(=C(C=C1Br)Br)Cl	Oc1ccc(Br)cc1Br
-6.5445223	-1.8200542	3.389168	4.724468	1.3353002	C1=C(C=C(N=C1Br)Br)C(F)(F)F	Oc1ccc(Br)cc1Br
-6.4042587	-2.3065088	2.6475267	4.0977497	1.450223	C1=C(C2=NC=C(N2N=C1Cl)Br)Br	CCOC1=C(C=C(C=C1Br)F)Br
-5.985681	-1.293962	3.269304	4.691719	1.422415	BrC%70=CC=C(Br)N%70C	O=C1C(Br)C2=CC=C(Br)C=C2N1C
-5.8879476	-0.83410764	3.3627625	5.0538397	1.6910772	C1=CC(=C(C(=C1)Br)Cl)Br	BrC%70=CC=C(Br)N%70C
-7.3433743	-3.7548203	2.5027974	3.588554	1.0857565	CC(=O)NC1=CC(=C(C=C1Br)[N+](=O)[O-])Br	CN(C9=O)C(C%10=C(Br)C=C%11C%12=C(C(N(C)C%11=O)=O)C(Br)=CC9=C%12%10)=O
-7.059992	-3.884249	2.294982	3.1757429	0.8807609	C1(=C(SC(=C1[N+](=O)[O-])Br)Br)[N+](=O)[O-]	C1=C(C2=NSN=C2C(=C1F)Br)Br
-6.1456313	-1.2568579	3.1425786	4.8887734	1.7461948	CS(=O)(=O)C1=CC(=C(C(=C1)Br)N)Br	C1=C(C(=C(C(=C1Br)N)Br)F)Cl
-6.810848	-2.5362601	3.0244148	4.274588	1.2501733	CC1=CC(=CC(=C1[N+](=O)[O-])Br)Br	C1=CC(=NC=C1Br)C2=NC=C(C=C2)Br
-6.73398	-2.3567183	2.8727932	4.377262	1.5044689	C1=C(C(=NC=C1Br)Br)Cl	Br/C=C/Br
-7.414419	-2.9224668	3.3453116	4.4919524	1.1466408	CC1=C(C=C(C=C1Br)S(=O)(=O)C(F)(F)F)Br	C1=C2C(=CC(=C1Br)Br)C(=O)OC2=O
-6.8519564	-1.6417736	3.6708286	5.2101827	1.5393541	C1=CC(=C(C(=C1Br)F)F)Br	N#CCS(=O)(C1=CC(Br)=CC=C1Br)=O
-6.492981	-1.4727786	3.5546923	5.0202026	1.4655104	COC1=CC(=C(C(=C1)Br)Cl)Br	[C-]#[N+]c1ccc(Br)cc1Br
-6.1292505	-3.2512677	2.2580366	2.8779829	0.61994624	CC1=CC(=C(C=C1Br)[N+](=O)[O-])Br	FC1=C(C2=CC(C)=C(Br)S2)C2=NSN=C2C(C2=CC(C)=C(Br)S2)=C1F
-6.460555	-2.8123755	2.7668417	3.6481795	0.8813379	C1=CC2=C(C=CC(=C2)Br)C=C1Br	C12=C(SC(=C1C(=O)OC2=O)Br)Br
-6.6119046	-2.6325579	2.8379114	3.9793468	1.1414354	CC1=CC(=C(C(=C1)Br)[N+](=O)[O-])Br	COC%41=CC=CC(C%42=NC(C(Br)=CC=C%43Br)=C%43N=C%42C%44=CC(OC)=CC=C%44)=C%41
-5.9372015	-2.0711515	2.6235092	3.86605	1.2425408	C1=C(C=C(C(=C1Br)N)Br)OC(F)F	C1=C(C=NC(=N1)Br)Br
-5.9333706	-1.0927665	3.340146	4.840604	1.5004578	CC1=C(SC(=C1Br)C)Br	C1=C(C(=C(C=N1)Br)N)Br
-6.6583967	-2.3605208	2.9625363	4.297876	1.3353395	C1(=C(C(=C(C(=C1Br)Cl)F)Cl)Br)N	C1(=NN=C(S1)Br)Br
-5.7847085	-1.1186495	3.2134671	4.666059	1.4525919	CC1=CC(=C(C=C1Br)Br)C	BrC4=CC5=C(SC(Br)=C5)S4
-6.6118083	-2.7083054	2.646539	3.903503	1.256964	C1=CC(=C(C(=C1[N+](=O)[O-])Br)F)Br	CC1=C(N(C(=N1)Br)C)Br
-5.4890313	-2.2120914	2.3055377	3.2769399	0.97140217	C1=CC2=C(C=C1Br)S(=O)(=O)C3=C2C=CC(=C3)Br	BrC%96=CC(C%97(SCCS%97)C%98=C%99SC(Br)=C%98)=C%99S%96
-5.9614487	-1.851537	2.8194358	4.109912	1.2904761	C1=C(C=C(C(=C1Br)N)C#N)Br	C1=CC2=C(C=C1Br)N=C(S2)Br
-6.3441925	-1.5651677	3.4807248	4.779025	1.2983003	COC1=C(C=C(C=C1Br)C(=NO)N)Br	C1=C(C=C(C(=C1Br)Cl)Cl)Br
-6.338551	-1.6312381	3.2998075	4.707313	1.4075055	CC1(C2=CC(=CC(=C2NC1=O)Br)Br)C	N#CCS(=O)(C1=CC(Br)=CC=C1Br)=O
-5.95371	-2.0681412	2.5142617	3.8855689	1.3713071	CN=[N+](C1=CC(=CC(=C1N)Br)Br)[O-]	C1=C(C2=NC=C(N2C=C1Cl)Br)Br
-6.8516984	-1.3785101	3.7776704	5.4731884	1.695518	C1=C(C=C(C=C1Br)Br)OC(F)F	CC1=C(C(=NC=C1Br)F)Br
-6.130094	-1.3646082	3.2018394	4.765486	1.5636463	C1=C(C(=C(C(=C1F)Br)F)Br)F	CC1=CC(=C(C(=C1Cl)Br)N)Br
-6.359741	-1.9947648	3.116469	4.3649764	1.2485075	Cc3ccc(c2ccc1cc(Br)cc(Br)c1n2)cc3	CC1=C(C=C(C=N1)Br)Br
-6.40005	-3.0759377	2.2110054	3.3241124	1.113107	C1=C(C(=CN=C1Br)Br)C=O	O=C(C1=C(F)C2=C(Br)SC(Br)=C2S1)OC
-6.3308325	-1.7916093	3.2197537	4.539223	1.3194695	CC1=CC(=C(C=C1Br)Br)C	C1=CC(=CC2=C1C=CC(=N2)Br)Br
-6.1069593	-1.5383558	3.1142	4.5686035	1.4544034	CC1=CC(=C(C=C1Br)Br)OC	COC(=O)C1=C(NC(=N1)Br)Br
-5.653359	-1.7125137	2.8174984	3.9408453	1.1233468	C1=C(C(=NC(=C1Br)Cl)N)Br	BrC(S6)=CC7=C6C(SC(Br)=C8)=C8S7
-6.524255	-2.765435	2.4950092	3.7588198	1.2638106	C1=C(C2=NC(=CN=C2N1)Br)Br	O=C%57C%58=C(Br)SC(Br)=C%58C(C%57(F)F)=O
-5.8293586	-1.3877366	3.2583234	4.441622	1.1832983	C1=CC(=C(C=C1Br)N)Br	COC%48(OC)C%49=C(C=CC(Br)=C%49)C%50=C%48C=C(Br)C=C%50
-6.531643	-3.1343918	2.7388122	3.3972511	0.6584389	C1=CC(=CC2=C1C=CC(=N2)Br)Br	C1=C(C2=NSN=C2C(=C1F)Br)Br
-5.831178	-1.4757615	2.8130145	4.355417	1.5424023	CC1=C(C=C(C(=O)N1C)Br)Br	CC1=C(C=C(C(=O)N1C)Br)Br
-6.3665266	-1.3652982	3.4484637	5.0012283	1.5527647	CC1=CC(=C(C(=C1)Br)[N+]#[C-])Br	CC(C)OC1=CC(=CC(=C1)Br)Br
-5.792014	-0.97108173	3.3206396	4.8209324	1.5002928	CC1=C(C(=CC(=C1F)Br)Br)N	CC1=C(C=CC(=C1C)Br)Br
-5.839623	-1.246516	3.150105	4.593107	1.4430022	COC1=C(C(=NC=C1Br)N)Br	CCn3c1cc(Br)ccc1c2ccc(Br)cc23
-6.1751313	-1.5908241	3.236444	4.584307	1.3478632	C1=C(C=C(C=C1Br)Br)C(F)(F)F	C1=CC2=C(C(=C1)Br)SC3=C2C=CC=C3Br
-6.62419	-2.5764055	2.8199458	4.0477843	1.2278385	C1(=C(C(=C(C(=C1Br)Cl)F)Cl)Br)N	C1=CN=C(C2=C1N=C(S2)Br)Br
-6.014264	-1.0517895	3.364254	4.962475	1.5982208	C1=CC(=C(C=C1Br)S)Br	C1=C(C=C(C=C1Br)Br)CC#N
-7.1054688	-2.9864788	2.6997929	4.11899	1.4191971	C1=C(C(=CC(=C1Br)C=O)Br)C=O	C1=C(N=CN=C1Br)Br
-6.438367	-1.8527843	3.2623734	4.5855827	1.3232093	C1=CC(=C(C=C1Br)Br)C(F)(F)F	CC1=C(N=C(S1)Br)Br
-5.8633356	-3.0381303	2.0304325	2.8252053	0.79477286	C1=C(SC2=C1SC3=C2SC(=C3)Br)Br	BrC%63=C%64C(C(N(C)C%64=O)=O)=C(Br)C%65=C%63C(N(C)C%65=O)=O
-5.987694	-1.0530217	3.3645546	4.9346724	1.5701177	CC1=CC(=CC(=C1N)Br)Br	C1=C(C=C(C(=C1Br)Cl)Br)Cl
-6.670344	-1.9002572	3.1831777	4.770087	1.586909	C1=C(C=C(C=C1Br)Br)C=O	CC1=CC(=C(C(=C1)Br)F)Br
-6.692252	-2.3997002	3.1804514	4.292552	1.1121006	COc1c(Br)cc(N(=O)=O)c(C)c1Br	CC1=C(C(=C(C=C1)Br)C)Br
-6.2792616	-2.478554	2.4888184	3.8007076	1.3118892	C1=C(C=C(C(=C1Br)F)C=O)Br	O=C(C1=C(F)C2=C(Br)SC(Br)=C2S1)OC
-5.803558	-1.8032153	2.3371885	4.0003424	1.6631539	CC1=NC(=C(C(=C1)Br)N)Br	C1=C(OC(=C1)Br)Br
-5.983432	-2.0888836	2.7349963	3.8945482	1.1595519	CC(C)C1=CC(=CC(=C1N)Br)Br	C1=CC=C2C(=C1)C(=NC(=N2)Br)Br
-7.1790495	-2.6265697	3.1336846	4.5524797	1.4187951	CC1=CC(=CC(=C1Br)[N+](=O)[O-])Br	C1=CC(=C(C(=C1)Br)C(F)(F)F)Br
-6.205888	-2.9443927	2.1861763	3.261495	1.0753188	CC(=O)C1=NC(=CN=C1Br)Br	BrC%23=C%24C(N=C(C%25=N%24)C%26=CC=CC%27=CC=CC%25=C%27%26)=C(Br)S%23
-6.689269	-1.8943827	3.4155817	4.7948866	1.3793049	C1=CC(=C(C=C1Br)F)Br	C1=CN=C(C=C1Br)C2=NC=CC(=C2)Br
-5.991978	-1.1622101	3.401711	4.829768	1.4280572	C1=CC(=C(C=C1Br)Br)S	C1=CC=C(C=C1)COC2=C(C=C(C=N2)Br)Br
-6.9759774	-2.9196825	2.8165007	4.056295	1.2397943	C1=CC(=C(C(=C1)Br)C(F)(F)F)Br	C(=O)C1=C(N=C(S1)Br)Br
-5.6289167	-1.2656116	2.9434307	4.363305	1.4198744	C1=CC(=C(C=C1Br)Br)S	C1=C(NC(=N1)Br)Br
-6.2751474	-2.250653	2.66352	4.024494	1.3609741	C1=C(C=NC2=C(C=NN21)Br)Br	C1=CC(=C(C(=C1Br)C=O)F)Br
-5.473926	-3.2703807	1.6901613	2.2035453	0.513384	C1=CC2=C(C3=NSN=C3C(=C2C=C1)Br)Br	C1=C(SC2=C1SC3=C2SC(=C3)Br)Br
-6.2483344	-3.1253068	2.1035173	3.1230276	1.0195103	O=C%59C%60=C(Br)SC(Br)=C%60C(N%59C)=O	O=C1N(C)C2=CC(Br)=CC=C2/C1=C1C2=CC=C(Br)C=C2N(C)C/1=O
-6.7362123	-1.4957278	3.7532752	5.240484	1.4872091	C1=C(C=C(C=C1Br)Br)C(F)(F)F	C1=CC(=C(C=C1Br)Br)Cl
-6.492329	-2.1166234	3.2750287	4.3757057	1.100677	C1=CC2=CC(=CN=C2C3=NC=C(C=C31)Br)Br	BrC1=CC2=CC=C3C(N=CC(Br)=C3)=C2N=C1
-5.9698696	-1.312144	3.1519637	4.6577253	1.5057616	C1=C(C=C(C(=C1Br)N)Br)F	C1=C(C(=CN=C1Br)Br)N
-6.8204327	-2.2511613	3.0108862	4.569271	1.5583849	CC1=C(C=C(C=C1Br)S(=O)(=O)C(F)(F)F)Br	CC1=NC(=NC=C1Br)Br
-7.0887003	-2.7753866	2.7924585	4.3133135	1.520855	CC1=CC(=CC(=C1Br)[N+](=O)[O-])Br	C1=C(C(=C(C=N1)Br)C=O)Br
-7.2501845	-2.67457	3.0366595	4.5756145	1.538955	CC1=NC(=CC(=C1)Br)Br	C1=CN=C(C(=C1Br)[N+](=O)[O-])Br
-5.6721454	-2.1853411	2.3282437	3.4868042	1.1585605	CN1C=C(N=C1Br)Br	FC%71=NC%72C(Br)=CC=C(Br)C%72N=C%71F
-6.089798	-1.7508142	2.8020992	4.3389835	1.5368843	C1CCOC(C1)N2C(=NC(=N2)Br)Br	CC1=CC(=C(N=C1Br)Br)N
-5.66965	-1.8800074	2.5944057	3.7896428	1.1952372	CC1=C(C=C(S1)Br)Br	C1=C(C2=NC(=CN=C2N1)Br)Br
-6.2706776	-2.0130568	3.1638162	4.257621	1.0938046	C1=CC(=CC2=C1C=CC(=N2)Br)Br	Brc3ccc(c2ccc(c1ccc(Br)cc1)cc2)cc3
-6.818441	-1.7162604	3.5500338	5.1021805	1.5521467	[C-]#[N+]C1=C(C=C(C=C1Br)F)Br	COC1=C(C=NC=C1Br)Br
-6.273716	-1.2493299	3.5674567	5.024386	1.4569292	COC1=C(C=C(C=C1)Br)Br	C1=C(C(=CC(=C1Cl)Br)Br)F
-6.47704	-2.0943544	2.922613	4.3826857	1.4600728	C1=CC(=C(C(=C1)Br)C(F)(F)F)Br	BrC%87=C%88C(SC(Br)=C%88)=NC%89=C%87C(F)=C(F)S%89
-6.0659018	-2.0912778	2.6032681	3.974624	1.3713558	C1(=C(N=C(N1)Br)Br)C(F)(F)F	COC1=CC(=C2C(=C1Br)C=CC=N2)Br
-6.793439	-3.1207871	2.6942	3.6726518	0.9784517	C1=C(C=C(C(=C1Br)N=C=S)OC(F)(F)F)Br	O=C%57C%58=C(Br)SC(Br)=C%58C(C%57(F)F)=O
-6.3535295	-2.622695	2.518162	3.7308345	1.2126725	C1=C(C(=NN=C1Br)N)Br	O=C%59C%60=C(Br)SC(Br)=C%60C(N%59C)=O
-6.1422834	-1.9491059	2.6943426	4.1931777	1.4988351	C1=CC(=NC(=C1Br)N)Br	CC1=CC(=NN=C1Br)Br
-6.1867795	-1.3881907	3.2382271	4.7985888	1.5603616	BrC#CBr	Brc1sc(Br)cc1
-6.584351	-2.641818	2.388774	3.942533	1.5537591	CC(=O)C1=NC(=CN=C1Br)Br	COC1=CC(=CC(=C1)Br)Br
-6.6865745	-2.2015717	3.1555443	4.4850025	1.3294582	C1=C(C=C(C(=C1Br)F)Br)F	BrC1=NC2=CC=C(Br)C=C2O1
-7.37875	-3.1558797	3.009559	4.22287	1.213311	C1=C(C(=CN=C1Br)Br)[N+](=O)[O-]	C1=C(C=C(N=C1Br)Br)F
-6.55181	-2.2865858	2.9120204	4.265224	1.3532035	C1=CN=C(C=C1Br)Br	C1=CC=C2C(=C1)C(=CN=C2Br)Br
-5.647438	-2.2116957	2.2768977	3.4357424	1.1588447	C1=C(C=C(N2C1=CN=C2)Br)Br	BrC%28=NC%29=C(N=C(Br)S%29)S%28
-6.228939	-1.8388613	3.2722037	4.3900776	1.1178739	C1=CC2=C(C=C1Br)S(=O)(=O)C3=C2C=CC(=C3)Br	COC1=CC(=CC(=C1)Br)Br
-5.6873183	-1.6656842	2.7048342	4.021634	1.3167999	C1C2=C(C=CC(=C2)Br)C3=C1C=C(C=C3)Br	C1=C(C=NC2=C(C=NN21)Br)Br
-5.4736032	-0.7792715	3.1265469	4.6943316	1.5677848	C1=CC2=C(C=C1Br)C3=C(N2)C=CC(=C3)Br	C1COCCN1C2=CC(=CC(=C2)Br)Br
-5.910688	-2.6283376	2.264301	3.2823503	1.0180492	C1CC2=C(C(=CC(=N2)Br)Br)NC1	BrC1=C(N=C(C)C(C)=N2)C2=C(Br)C2=NC(C)=C(C)N=C12
-6.293884	-2.623394	2.3670967	3.6704898	1.3033931	C1=CC(=C(C=C1Br)OC(F)F)Br	O=S1(=O)C(Br)=CC=C1Br
-5.717386	-1.1253023	3.234054	4.5920835	1.3580294	CCC1=CC(=C(C(=C1)Br)N)Br	COc1cc(Br)c(Br)cc1OC
-6.7776985	-3.4595406	2.5683572	3.318158	0.7498007	BrC(OC(Br)=C/1)=CC1=C(C#N)\C#N	BrC1=C(C#N)SC(Br)=C1C#N
-5.969986	-0.8600043	3.452182	5.1099815	1.6577995	CC1=CC(=CC(=C1C)Br)Br	C1=C(C=C(C=C1Br)Br)N
-6.086953	-1.408985	3.0339203	4.677968	1.6440477	C1=CC(=C(C(=C1F)Br)F)Br	C1COC2=C(SC(=C2O1)Br)Br
-6.711339	-1.0533183	3.9765358	5.658021	1.6814852	CC1=CC(=C(C(=C1)Br)[N+]#[C-])Br	BrCc1ccc(CBr)cc1
-5.5945835	-1.1985863	2.9312499	4.395997	1.4647472	C1CCN(CC1)C2=CC(=CC(=C2)Br)Br	CC1=CC(=NC(=C1)Br)Br
-6.461203	-1.2269826	3.58577	5.2342205	1.6484506	COC1=C(C=C(C=C1Br)F)Br	CC1=C(C(=NC=C1Br)C)Br
-5.884932	-0.94661784	3.2717364	4.9383144	1.666578	CC1=C(C(=CC(=C1F)Br)Br)N	C1=CC(=C(C(=C1)Br)CC#N)Br
-7.2385	-2.8738322	2.8471532	4.364668	1.5175147	C1=CC(=C(C=C1Br)C#N)Br	C1=C(C=NC(=C1Br)[N+](=O)[O-])Br
-7.3893723	-3.6679397	2.799689	3.7214327	0.92174363	CC1=CC(=CC(=C1[N+](=O)[O-])Br)Br	BrC1=C([N+]([O-])=O)C([N+]([O-])=O)=C(Br)C2=NSN=C12
-5.833713	-1.7009087	3.2866018	4.1328044	0.8462026	C1=CC2=C(C=C1Br)S(=O)(=O)C3=C2C=CC(=C3)Br	CC1=C(C=CC(=C1Br)N)Br
-6.0939674	-1.5916846	3.1489143	4.502283	1.3533688	COC1=C(C=C(C=C1C#N)Br)Br	C1=CC(=NC(=C1Br)N)Br
-5.8709574	-1.1676495	3.259653	4.703308	1.443655	CN1C(=C(N=C1Br)F)Br	CC1=CC(=C(C=C1Br)Br)OC
-6.871905	-1.9196126	3.5742426	4.9522924	1.3780499	C1=C(C=C(C(=C1Br)F)Br)Cl	C1=C(C=C(N=C1Br)Br)F
-6.2782345	-1.7612765	2.669068	4.516958	1.8478901	O=n1cc(Br)ccc1Br	Brc1cncc(Br)c1
-6.7773	-2.2260158	2.86706	4.551284	1.6842239	C1=CC(=C(C=C1Br)C=O)Br	C1=C(C=C(C(=C1Br)Cl)Cl)Br
-6.2514744	-2.9891298	2.2734272	3.2623446	0.98891735	CC1=C(C=CC(=C1[N+](=O)[O-])Br)Br	BrC%23=C%24C(N=C(C%25=N%24)C%26=CC=CC%27=CC=CC%25=C%27%26)=C(Br)S%23
-6.2921615	-2.4703026	2.5824316	3.821859	1.2394273	C1=C(C2=NC=C(N2C=C1Cl)Br)Br	[O-][N+](=O)c1cc(Br)ccc1Br
-6.758018	-2.548533	2.774597	4.209485	1.4348881	C1(=C(N=C(N1)Br)[N+](=O)[O-])Br	C1=CC2=NC(=NN2C(=C1)Br)Br
-6.6191783	-2.3025222	2.756337	4.316656	1.5603192	C1=C(C2=NC=C(N2N=C1Cl)Br)Br	COCN1C(=NC(=N1)Br)Br
-5.348372	-1.6382087	2.6119528	3.710163	1.0982103	C1=C(SC2=C1SC(=C2)Br)Br	COC1=CC(=C(C=C1Br)Br)OC
-5.978641	-1.0457708	3.3306873	4.9328704	1.6021831	CC1=C(C(=CC(=C1Cl)Br)Br)N	CC1=C(C(=CC(=C1F)Br)Br)N
-6.59791	-1.8731456	3.1991343	4.7247643	1.52563	C1=CC(=C(C(=C1Br)Cl)Cl)Br	Br/C=C/Br
-5.935419	-2.3886695	2.5788825	3.5467496	0.96786714	C1=C(C(=C(C(=C1F)Br)F)Br)N	C1=CC2=C(C=C1Br)C3=CC(=CC(=C3N2)[N+](=O)[O-])Br
-6.459282	-1.1922202	3.753125	5.2670617	1.5139368	CC1=CC(=C(C(=C1)Br)C)Br	C1=C(C=C(C=C1Br)Br)CC(F)(F)F
-7.2154984	-2.549594	3.149224	4.6659045	1.5166805	C1=CC(=C(C(=C1)Br)[N+](=O)[O-])Br	C1=C(C=NC(=C1Br)F)Br
-6.0870767	-2.4228768	2.3930912	3.6641998	1.2711086	C1=C(N=C(C=N1)Br)Br	CN(C)C1=NC=C(N=C1Br)Br
-6.0833945	-2.494669	2.2832165	3.5887256	1.3055091	C1=C(C(=C(C(=C1Br)Cl)C#N)N)Br	O=C(C1=C(F)C2=C(Br)SC(Br)=C2S1)OC
-6.545655	-2.519847	2.9274056	4.025808	1.0984023	CC1=C(C(=NC=C1Br)Br)[N+](=O)[O-]	COC1=C(C=CC(=C1)Br)Br
-6.802291	-2.2669954	2.936278	4.5352955	1.5990174	C1=CC(=C(C=C1Br)C=O)Br	C1=CC(=NC(=C1F)Br)Br
-5.8986955	-1.6284244	2.9846544	4.2702713	1.2856169	C1=CC(=NC=C1Br)Br	COc1cc(Br)c(OC)cc1Br
-5.9951944	-1.9202471	2.5997937	4.0749474	1.4751537	COC1=C(C=CC=C1Br)Br	CN=[N+](C1=CC(=CC(=C1N)Br)Br)[O-]
-6.806677	-2.5309496	3.004311	4.2757273	1.2714162	CC(=O)NC1=CC(=C(C=C1Br)[N+](=O)[O-])Br	C1=CC2=NC(=NN2C=C1Br)Br
-6.364284	-1.6508505	3.3149145	4.7134333	1.3985188	C1=CC=C(C=C1)COC2=C(C=C(C=N2)Br)Br	BrC#CC#CBr
-5.850961	-1.3110721	2.9765959	4.5398893	1.5632935	CC1=CC(=C(C=C1Br)Cl)Br	C1=C(C=C2C(=C1Br)C(=NN2)N)Br
-5.7921844	-1.8431844	2.6699352	3.949	1.2790647	C1=C(C(=C(C(=C1F)Br)F)Br)N	Br/C=C/C%30=CC=C(Br)S%30
-7.25496	-3.4045448	2.6495314	3.8504152	1.2008839	CC(=O)NC1=CC(=C(C=C1Br)[N+](=O)[O-])Br	C1(=C(SC(=C1[N+](=O)[O-])Br)Br)[N+](=O)[O-]
-5.8523436	-1.8130047	2.668064	4.039339	1.371275	C1=C(C=C(C(=C1Br)N)Br)OC(F)F	C1=CC2=NC(=NN2C(=C1)Br)Br
-6.1026115	-2.7704947	2.1819773	3.3321168	1.1501396	COC1=CC(=C(C=C1Br)Br)OC	C1=C(C2=NON=C2C(=C1)Br)Br
-6.318139	-2.3603165	2.702487	3.9578226	1.2553356	CN1C=C(C(=O)C(=C1)Br)Br	C1=C(C=NC2=CC(=CN=C21)Br)Br
-6.879059	-1.8647535	3.596746	5.014305	1.4175591	C1=C(C(=C(C(=C1F)Br)F)Br)F	C1=C(C(=NC=C1Br)Br)Cl
-6.0075207	-1.8595424	2.8935707	4.1479783	1.2544076	CC(C)C1=CC(=CC(=C1N)Br)Br	C1=C(C=NC(=C1Br)C#N)Br
-6.271202	-2.85984	2.2674727	3.4113622	1.1438894	C1=C(C=NC(=N1)Br)Br	BrC%23=C%24C(N=C(C%25=N%24)C%26=CC=CC%27=CC=CC%25=C%27%26)=C(Br)S%23
-6.2866163	-1.608756	3.3613465	4.6778603	1.3165138	COC(=O)C1=C(C=C(C=C1)Br)Br	CC1=C(C(=NC=C1Br)N)Br
-5.5981383	-1.2470616	2.9284205	4.3510766	1.422656	CC(C)C1=CC(=CC(=C1N)Br)Br	C1=CC(=NC(=C1N)Br)Br
-6.846219	-1.2839984	3.8008955	5.5622206	1.7613251	C1=CC(=C(C(=C1)Br)Cl)Br	C1=CC(=C(C(=C1)Br)F)Br
-6.6980557	-2.9216568	2.6317024	3.776399	1.1446965	C1=C(C(=NC=C1Br)Br)[N+](=O)[O-]	C1=C(N=C(C(=N1)Br)N)Br
-5.553827	-1.0268755	3.1022837	4.5269513	1.4246676	C1=C(C=C(C(=C1Br)N)Br)S(=O)(=O)N	COC1=CC(=CC(=C1N)Br)Br
-6.984949	-3.2318978	2.7090187	3.7530513	1.0440326	C1=C(C2=NSN=C2C(=N1)Br)Br	COCN1C(=NC(=N1)Br)Br
-6.545968	-2.4737775	2.8805287	4.0721903	1.1916616	C1=C(C=NC2=CC(=CN=C21)Br)Br	BrC1=CC2=CC=C3C(N=CC(Br)=C3)=C2N=C1
-5.790231	-1.5187525	2.9437103	4.2714787	1.3277683	CC1=CC(=C(C(=C1C)Br)N)Br	CC1=C(N=C(S1)Br)Br
-6.061438	-2.0494964	2.654048	4.011942	1.357894	C1=C(N=CC2=NNC(=C21)Br)Br	C1=C2C(=C(C(=C1Br)N)Br)OC(O2)(F)F
-6.2081614	-1.7933029	3.0442538	4.4148583	1.3706045	C1=C(C(=C(C(=C1Br)Cl)Cl)N)Br	C1=C2C(=C(C(=C1Br)N)Br)OC(O2)(F)F
-6.4340324	-2.261	2.8700948	4.1730328	1.302938	C1=CC2=NC(=NC=C2C=C1Br)Br	CC(C)(C)c1cc(Br)c(C(C)(C)C)cc1Br
-5.683697	-2.2376761	2.4453783	3.446021	1.0006428	C1=C(C=C(C=C1Br)Br)C=O	BrC(S6)=CC7=C6C(SC(Br)=C8)=C8S7
-6.5501075	-1.9170128	3.2783687	4.633095	1.3547261	C1=C(C(=CC(=C1Br)F)Br)F	C1=CC(=NC=C1Br)Br
-5.857296	-1.5109665	2.9832633	4.3463297	1.3630664	COC1=C(C(=CC(=N1)Br)Br)N	C1=C(C=C(N=C1Br)Br)N
-6.613015	-2.30238	3.1602917	4.310635	1.1503434	C1=C(C=C(N=C1Br)Br)Cl	C1=C(C=C(C(=C1Br)N=C=S)OC(F)(F)F)Br
-6.6993823	-3.3009946	2.5349927	3.3983877	0.863395	C1=C(C2=NSN=C2C(=C1)Br)Br	BrC1=C(C#N)SC(Br)=C1C#N
-7.562969	-3.4816976	2.7559562	4.0812716	1.3253155	C1=CC(=C(C=C1Br)Br)[N+](=O)[O-]	C1(=C(SC(=C1[N+](=O)[O-])Br)Br)[N+](=O)[O-]
-6.673462	-2.697598	2.928651	3.975864	1.0472128	CC1=CC(=CC(=C1)Br)Br	C1=C2C=C(C=NC2=C(C=C1[N+](=O)[O-])Br)Br
-6.610779	-2.1438532	2.86578	4.4669256	1.6011455	C1=C(C=C(C=C1Br)Br)C=O	C1(=C(N=C(N1)Br)Br)C(F)(F)F
-6.301575	-1.6811304	3.1687102	4.620445	1.4517345	C1=C(C(=C(C(=C1Br)C(F)(F)F)Br)N)F	C1=C(C=C(C=C1Br)Br)CC#N
-6.099925	-1.8541027	2.8095465	4.2458224	1.436276	CN1C=C(C(=O)C(=C1)Br)Br	COC(=O)C1=C(NC(=N1)Br)Br
-6.2192764	-1.5197768	3.134345	4.6994996	1.5651546	C1=C(C(=C(C(=C1Br)N)Br)F)F	O=S(OC)(C1=CC(Br)=CC=C1C1=CC=C(Br)C=C1S(OC)(=O)=O)=O
-6.3201237	-2.1657557	2.7117207	4.154368	1.4426472	CC(C)(C)N=[N+](C1=CC(=CC(=C1N)Br)Br)[O-]	CC1=NC(=C(C=C1Br)Br)Cl
-6.464518	-1.9373424	3.2504787	4.527176	1.2766972	CC1=C(C=CC(=C1F)Br)Br	C1=CC2=CC(=CN=C2C3=NC=C(C=C31)Br)Br
-6.8169475	-2.477867	3.1721919	4.339081	1.166889	CC1=CC(=CC(=C1Cl)Br)Br	CC1=CC(=C(C(=C1[N+](=O)[O-])Br)I)Br
-5.413722	-0.9415314	3.1047244	4.472191	1.3674664	C1=CC(=C(C=C1Br)NN)Br	C1CC2=CC(=CC(=C2NC1)Br)Br
-6.682851	-1.1224782	3.9145136	5.5603724	1.6458588	CC1=C(C=C(C(=N1)C)Br)Br	CC1=C(C(=NC=C1Br)C)Br
-6.30437	-2.3306623	2.6070714	3.9737077	1.3666363	CC1=CC(=C(C(=C1)Br)[N+](=O)[O-])Br	BrC%70=CC=C(Br)N%70C
-5.8105636	-1.7429844	2.6939962	4.0675793	1.3735831	C1=C(C=NC2=C(C=NN21)Br)Br	CN(C)C1=NC=C(N=C1Br)Br
-5.991798	-1.573465	3.0005357	4.418333	1.4177973	C1=CC2=C(C=C1Br)C(=CO2)Br	BrC#CC#CBr
-6.71673	-2.3342056	3.2131014	4.3825245	1.1694231	C1=CC2=C(C=CN=C2C=C1Br)Br	C1=C(C(=NC=C1Br)Br)C#N
-6.3299003	-1.4972081	3.274673	4.832692	1.5580192	CC1=C(C=C(C(=C1Cl)Br)Cl)Br	C1=C(C(=NC=C1Br)Br)N
-6.1352367	-2.120572	2.9448717	4.0146646	1.069793	C1=CC(=C(C=C1Br)Br)N=C=S	Br/C=C/Br
-6.5089493	-2.5590074	2.506294	3.9499419	1.4436479	CC(=O)C1=NC(=CN=C1Br)Br	C1=C(C=C(N=C1Br)Br)N
-5.9560204	-2.1227434	2.484745	3.833277	1.348532	C1=C(SC(=N1)Br)Br	C1=C2C(=C(C(=C1Br)N)Br)OC(O2)(F)F
-5.9014945	-1.2242436	3.1824713	4.677251	1.4947796	CC1(C2=CC(=CC(=C2NC1=O)Br)Br)C	CN1C=C(C(=O)C(=C1)Br)Br
-6.138055	-2.779707	1.8345389	3.358348	1.523809	CC1=C(C=C2C(=CNC2=N1)Br)Br	CCN1C2=C(C=C(C=C2C(=O)C1=O)Br)Br
-5.388507	-3.2481453	0.9810647	2.1403615	1.1592969	C1=C(SC2=C1C(=O)C3=C2SC(=C3)Br)Br	FC%71=NC%72C(Br)=CC=C(Br)C%72N=C%71F
-6.5201163	-2.7932172	2.684796	3.7268991	1.042103	C1=CC2=C(C=C1Br)SC(=N2)Br	O=C%59C%60=C(Br)SC(Br)=C%60C(N%59C)=O
-5.828519	-1.712276	2.6676917	4.116243	1.4485512	CC1=C(C=C(C=C1Br)S(=O)(=O)C(F)(F)F)Br	C1=C(C=C(N2C1=CN=C2)Br)Br
-6.096518	-2.0970068	2.8673253	3.9995112	1.1321859	CC1=CC(=CC(=C1Cl)Br)Br	BrC%90=C(F)C%91=C(C(SC(Br)=C%92F)=C%92S%91)S%90
-7.660555	-2.952534	3.1612496	4.708021	1.5467715	C1=C(C(=C(C(=C1F)Br)[N+](=O)[O-])Br)F	C1=CN=C(C(=C1Br)C#N)Br
-6.341624	-1.5615427	3.071384	4.780081	1.7086968	C1=CN2C(=NC(=N2)Br)C=C1Br	CC(=O)NC1=CC(=CC(=C1)Br)Br
-6.284594	-2.1599464	2.773318	4.1246476	1.3513296	C1=C(C2=NNC(=C2C=N1)Br)Br	C1=C(C2=NC=NN2C=C1Br)Br
-6.1449585	-1.1422081	3.3609521	5.0027504	1.6417983	CC1=C(C=C(C=N1)Br)Br	CC1=C(C=C2C(=CNC2=N1)Br)Br
-6.695569	-3.5971844	2.4499724	3.0983846	0.6484122	C1=C(N2C=C(N=C(C2=N1)Br)Br)Cl	C1=C(C2=NSN=C2C(=N1)Br)Br
-6.82687	-2.8351662	3.14116	3.9917037	0.85054374	CC1=NC(=CC(=C1)Br)Br	BrC(C=N1)=CC2=C1C(N=CC(Br)=C1)=C1C1=NSN=C21
-6.880789	-2.4695725	2.9330115	4.4112163	1.4782047	C1=C(C=C(C=C1Br)Br)C=O	C1=C(N=CN=C1Br)Br
-6.653957	-1.5942354	3.4720216	5.0597215	1.5876999	C1=CC(=C(C=C1Br)C(F)(F)F)Br	CCOC1=C(C=C(C=C1Br)F)Br
-7.1332803	-2.5922694	3.1460977	4.541011	1.3949132	C1=CC(=C(C=C1Br)Br)[N+](=O)[O-]	C1=C(C=C(C=C1Br)Br)[N+](=O)[O-]
-6.375372	-1.3621731	3.432698	5.013199	1.5805008	CN1C(=C(N=C1Br)C#N)Br	CC1=C(C=C(C=C1Br)OC)Br
-5.699281	-2.1624913	2.4183462	3.53679	1.1184437	BrC%34=CC%35=C(Br)SC=C%35S%34	Brc1ccc(cc1)C(=O)c2ccc(Br)cc2
-6.108113	-2.8358474	2.2853675	3.2722654	0.98689795	C1=C(C(=NC=C1Br)Br)[N+](=O)[O-]	C1=C(SC2=C1SC(=C2)Br)Br
-6.435452	-2.89391	1.7666038	3.541542	1.7749382	CC1=CC(=C(N=C1Br)C)Br	CCN1C2=C(C=C(C=C2C(=O)C1=O)Br)Br
-6.473813	-2.2713017	2.9690921	4.2025113	1.2334192	C1=C(C=C(C(=C1Br)Cl)Cl)Br	CC1=C(SC(=N1)Br)Br
-6.2276683	-1.8025341	3.0856645	4.425134	1.3394697	CC(C)OC1=CC(=CC(=C1)Br)Br	C1=CC(=C2C=NC=CC2=C1Br)Br
-6.296024	-1.2602937	3.562207	5.0357304	1.4735234	COC1=C(C=C(C=C1)Br)Br	C1=C(C(=CC(=C1Cl)Br)Br)F
-6.075445	-1.0673847	3.37458	5.0080605	1.6334805	CC1=CC(=CC(=C1)Br)Br	C1=C(C(=C(C=N1)Br)N)Br
-6.065307	-1.5759196	3.0613122	4.4893875	1.4280753	C1=C(C(=C(C(=C1Br)Cl)C#N)N)Br	CC1=C(C=C2C(=CNC2=N1)Br)Br
-6.719666	-2.5668092	2.8335762	4.152857	1.3192806	C1=C(C=C(C(=C1Br)F)Br)[N+](=O)[O-]	CC(C)OC1=C(C=C(C=C1C=O)Br)Br
-6.1179247	-1.2736008	3.3896868	4.844324	1.4546373	C1=C(C=C(C=C1Br)Br)OC(F)F	C1CCOC(C1)COC2=C(C=C(C=C2)Br)Br
-6.594562	-1.3843693	3.641295	5.2101927	1.5688977	C1=C(C=C(N=C1Br)Br)N	CC1=C(C(=NC=C1Br)Cl)Br
-6.2153935	-2.4520464	2.5646443	3.7633471	1.1987028	C1=CN=C(C=C1Br)Br	C1=CC2=C(C=C1Br)C3=CC(=CC(=C3N2)[N+](=O)[O-])Br
-6.0955477	-1.7101759	2.889453	4.3853717	1.4959188	CC1=C(C(=C(C=C1Cl)Br)N)Br	CC1=NC(=NC=C1Br)Br
-6.4250507	-2.093971	3.086764	4.3310795	1.2443154	C1=C(C=C(C(=C1Br)Cl)OC(F)(F)F)Br	CC1=C(N=C(S1)Br)Br
-6.5029206	-2.2421968	2.807748	4.260724	1.452976	C1=CC(=C(C=C1Br)Br)C=O	C1=C(C(=CN=C1Br)Br)N
-6.3557134	-1.722919	3.140188	4.6327944	1.4926064	C1=C(C=C(C=C1Br)Br)OC(F)F	Br/C=C/Br
-6.4071054	-2.6414537	2.4734216	3.7656517	1.2922301	C1=C(C=C(C(=C1Br)N)Br)C(F)(F)F	O=C%59C%60=C(Br)SC(Br)=C%60C(N%59C)=O
-6.9651513	-2.7114496	3.1695487	4.2537017	1.0841529	C1=C(C=C(C=C1Br)Br)C#N	BrC1=C(C#N)SC(Br)=C1C#N
-5.83903	-1.2848539	3.1918168	4.554176	1.362359	C1=CC(=C2C(=C1Br)C=NN2)Br	CC1=CC(=C(C=C1Br)Br)OC
-7.050466	-2.5201976	3.1308873	4.5302687	1.3993814	CC1=C(C=CN=C1Br)Br	CC1=CC(=CC(=C1[N+](=O)[O-])Br)Br
-5.963044	-1.7248462	3.077069	4.238198	1.1611288	CC1=CC(=C(C=C1Br)C)Br	CN(C)C1=NC=C(N=C1Br)Br
-6.3659124	-2.2291932	2.8394625	4.136719	1.2972567	CC(C)OC1=C(C=C(C=C1C=O)Br)Br	C1=C(N=C(C(=N1)Br)N)Br
-6.6213484	-2.6223245	2.797895	3.999024	1.201129	C1=CC=C2C(=C1)C(=CN=C2Br)Br	C1=C(N=C(C(=N1)Cl)Br)Br
-6.78844	-3.017747	2.9004476	3.7706933	0.8702457	C1(=C(C2=NSN=C2C(=C1F)Br)Br)F	C1=C(C(=CC(=C1Cl)Br)Br)F
-6.496674	-2.1218293	2.9976382	4.3748446	1.3772063	CN1C(=CN=C1Br)Br	BrC%95=NC=NC(Br)=N%95
-6.7142925	-1.9338127	3.462665	4.78048	1.3178148	C1=C(C(=CC(=C1Br)F)Br)C#N	Brc1cscc1Br
-5.982155	-1.9613178	3.071147	4.020837	0.94968987	C1=CC(=C(C=C1Br)Br)N=C=S	BrC4=CC5=C(SC(Br)=C5)S4
-5.9150577	-1.7633375	2.647823	4.15172	1.503897	C1=CC(=C2C(=C1Br)C=NN2)Br	C1=CN=C(C(=C1Br)N)Br
-5.7304926	-1.0673254	3.2530658	4.663167	1.4101012	C1=C(C=C(C(=C1Br)N)Br)OC(F)F	CC1=CC(=C(C=C1Br)N)Br
-6.3629894	-1.4710925	3.383659	4.891897	1.5082383	C1=CC(=C(C(=C1Br)F)Cl)Br	C1C2=CC(=CC(=C2NC1=O)Br)Br
-6.6612453	-2.5159822	2.9179952	4.145263	1.227268	CC1=CC(=CC(=C1Br)[N+](=O)[O-])Br	Brc1sccc1Br
-6.4757667	-1.6902809	3.3941875	4.7854857	1.3912983	CC1=C(C=C(C=C1Br)S(=O)(=O)C(F)(F)F)Br	BrC1=CC=C2C3=CC=C(Br)C=C3OC2=C1
-6.3820305	-2.4791505	2.8418195	3.90288	1.0610604	CC1=CC(=C(C(=C1)Br)Cl)Br	BrC(OC(Br)=C/1)=CC1=C(C#N)\C#N
-6.2240906	-2.3774114	2.9833734	3.8466792	0.8633058	C1=CC(=C(C=C1Br)S)Br	CC1=C(C=C(C=C1[N+](=O)[O-])Br)Br
-6.1169415	-1.8961285	2.9278052	4.220813	1.2930076	C1=C(C=C(C=C1Br)Br)C=O	C1=C(C2=C(S1)C(=CS2)Br)Br
-6.876146	-2.5806408	2.9850976	4.295505	1.3104074	C1=C(N=CN=C1Br)Br	C1=C(C(=CN=C1Br)Br)F
-6.759165	-3.0089679	2.5547018	3.750197	1.1954951	COC1=C(C=C(C=C1Br)F)Br	O=C%57C%58=C(Br)SC(Br)=C%58C(C%57(F)F)=O
-6.292975	-1.5271035	3.4356093	4.7658715	1.3302622	COC1=C(C=C(C=C1Br)C(=NO)N)Br	C1=C(C=C(C(=C1F)Br)F)Br
-6.6132245	-1.4291595	3.5971575	5.184065	1.5869074	BrC#CBr	CC(C)(C)c1cc(Br)c(C(C)(C)C)cc1Br
-7.083643	-2.715153	3.011756	4.36849	1.3567343	C1=CC(=C(C(=C1[N+](=O)[O-])Br)F)Br	Brc1ccc(cc1)C(=O)c2ccc(Br)cc2
-6.239129	-1.1773684	3.4498482	5.061761	1.6119127	CCC1=CC(=CC(=C1Br)CC)Br	C1=C(C(=C(C(=C1Cl)Br)Cl)Br)N
-5.8020167	-1.2991009	2.8873367	4.502916	1.6155791	C1=C(C(=C(C(=C1Br)F)Br)N)Cl	C1=C(C=C2C(=C1Br)C(=NN2)N)Br
-6.013055	-1.2022365	3.2542796	4.810818	1.5565386	CC1=CC(=C(C(=C1Cl)Br)N)Br	C1=C(C(=CC(=C1F)Br)Br)F
-7.420817	-2.8222601	3.1246915	4.5985565	1.473865	C1=C(C=C(C=C1Br)Br)[N+](=O)[O-]	C1=C(C(=C(C(=C1F)Br)[N+](=O)[O-])Br)F
-6.3983	-1.4672923	3.4333758	4.931008	1.497632	CC1=NC(=C(C=C1Br)Br)F	CC1(C2=CC(=CC(=C2NC1=O)Br)Br)C
-5.677435	-1.7038633	2.570633	3.9735718	1.4029388	C1=C(C(=C(C(=C1Br)N)Br)F)F	C1=C(SC2=C1SC3=C2SC(=C3)Br)Br
-6.8097587	-2.7535324	2.8123932	4.0562263	1.2438331	CC(=O)NC1=CC(=C(C=C1Br)[N+](=O)[O-])Br	COC1=C(C=C(C=C1C#N)Br)Br
-7.050458	-2.2220998	3.6481545	4.828358	1.1802037	CC1=C(C=NC=C1Br)Br	C1=C(C(=C(C=N1)Br)C#N)Br
-6.250148	-2.139528	2.986237	4.1106195	1.1243825	C1=CN=CC2=C1C(=CC(=N2)Br)Br	CC1=CC(=C(C(=C1N)Br)Cl)Br
-6.321987	-1.338485	3.487101	4.9835024	1.4964013	C1=C(C=NC(=C1Br)N)Br	C1=C(C(=C(C=N1)Br)Cl)Br
-6.5640593	-2.501925	2.8447175	4.0621343	1.2174168	CC(C)(C)C(=O)NC1=CC(=CC(=C1)Br)Br	C1=CN=C(C2=C1N=C(S2)Br)Br
-6.5647235	-1.880562	3.158171	4.6841617	1.5259907	CC1=C(C=CC(=C1C)Br)Br	CC1=NC(=NC=C1Br)Br
-6.7008376	-1.9573094	2.9656334	4.7435284	1.777895	C1=CC(=[N+](C(=C1)Br)[O-])Br	C1CCOC(C1)N2C(=NC(=N2)Br)Br
-5.7485123	-1.4155204	3.0801432	4.3329916	1.2528484	C1=CC(=C(C=C1Br)NN)Br	Oc1ccc2cc(Br)ccc2c1c3c(O)ccc4cc(Br)ccc34
-6.39067	-2.9194312	2.3019156	3.4712386	1.169323	CC1=CC(=C(C(=C1)Br)N)Br	COC1=C(N=C(C(=C1)[N+](=O)[O-])Br)Br
-5.962059	-1.5995281	2.8947027	4.3625307	1.467828	C1=C(C(=NC=C1Br)Br)Cl	C1CCN(CC1)C2=CC(=CC(=C2)Br)Br
-6.7123566	-2.7614946	2.711419	3.950862	1.2394428	C1=C(N=CC(=N1)Br)Br	C1=C(C(=NC=C1Br)Br)Cl
-6.4251547	-1.6492225	3.200579	4.7759323	1.5753534	COC1=C(C(=NC=C1Br)OC)Br	O=n1cc(Br)ccc1Br
-6.255939	-1.2906908	3.3161418	4.965248	1.6491063	C1=C(C(=C(C(=C1Br)N)Br)F)Cl	CC(C)C1=CC(=CC(=C1Cl)Br)Br
-6.646461	-2.0465379	3.1238313	4.599923	1.4760919	C1=C(C=C(C=C1Br)Br)CC(F)(F)F	C1=C(C=NC(=N1)Br)Br
-6.3085394	-1.3199728	3.4792037	4.9885664	1.5093627	COC1=CC(=C(C=C1Br)Br)F	CC1=CC(=C(N=C1Br)C)Br
-6.81046	-2.748462	2.8833447	4.0619984	1.1786537	C1=CC2=C(C=C1Br)N=C(S2)Br	C1=C(C(=NC=C1Br)Br)[N+](=O)[O-]
-5.7406516	-1.4244545	3.1988285	4.3161974	1.1173689	C1=CC(=C(C=C1Br)N=C=S)Br	COC1=CC(=CC(=C1N)Br)Br
-6.717122	-2.990489	2.029704	3.726633	1.696929	CC1=CC(=C(C=C1Br)[N+](=O)[O-])Br	C1=CC2=C(C=C1Br)C(=O)C(=O)C3=C2C=CC(=C3)Br
-5.7769604	-1.098443	3.406548	4.6785173	1.2719693	COC1=C(C=C(C=C1)Br)Br	C1=C(C2=C(S1)C(=CS2)Br)Br
-5.971469	-1.2825971	3.0591335	4.688872	1.6297383	C1=C(C=C(C(=C1Br)N)C(F)(F)F)Br	CC1=C(C(=C(C=C1F)Br)N)Br
-5.92021	-1.6468574	3.009792	4.2733526	1.2635605	CN(CC1=CC(=CC(=C1N)Br)Br)C2CCCCC2	C1=C(C(=NC=C1Br)Br)C(F)(F)F
-5.8778877	-1.7027435	3.0429506	4.175144	1.1321936	C1=C(C=C(C(=C1Br)N)OC(F)(F)F)Br	C1=C(N=C(S1)Br)Br
-6.6930385	-2.187832	3.0507576	4.505206	1.4544485	C1=C(C=C(C(=C1Br)F)Br)F	COC1=C(C=C(C=C1Br)C=O)Br
-5.974532	-1.4788082	3.0100195	4.4957237	1.4857042	C1CC2=C(C(=CC(=N2)Br)Br)NC1	C1=CC(=C(C=C1Br)Br)C(=O)N
-6.2051296	-2.24474	2.4822361	3.9603896	1.4781535	CC(C)(C)N=[N+](C1=CC(=CC(=C1N)Br)Br)[O-]	O=S(OC)(C1=CC(Br)=CC=C1Br)=O
-6.5362577	-2.797801	2.4889185	3.7384567	1.2495382	C1=C(C(=C(C=N1)Br)Cl)Br	O=CC%73=CC(S%74)=C(S%73)C%75=C%74C(Br)=C(C(SC(C=O)=C%76)=C%76S%77)C%77=C%75Br
-5.9202833	-1.7356815	2.6648564	4.184602	1.5197453	CC1=CC(=C(C(=C1)Br)[N+]#[C-])Br	CC(=O)C1=CC(=CC(=C1N)Br)Br
-7.3824735	-3.103167	3.1611917	4.2793064	1.1181147	C1=C(C=C(C=C1Br)Br)C(=O)Cl	C1=C(C(=CC(=C1Br)C(=O)Cl)Br)C(=O)Cl
-5.7897477	-3.5396023	1.8297558	2.2501454	0.42038965	C1=CC2=C(C3=NSN=C3C(=C2C=C1)Br)Br	C1=CC2=C(C3=NSN=C3C(=C2C=C1)Br)Br
-5.9279494	-1.2855471	3.251126	4.642402	1.3912761	C1=C(C=C(C(=C1Br)N)C(F)(F)F)Br	CC1=CC(=C(C(=C1N)Br)Cl)Br
-6.362771	-2.06056	3.0240643	4.302211	1.2781465	C1=CN2C(=NC(=N2)Br)C=C1Br	C1=CC2=C(C(=C1)Br)N=C(C=C2)Br
-6.741389	-2.5946546	2.7003937	4.146734	1.4463406	C1=C(C(=C(C=N1)Br)C=O)Br	CC1=CC(=NN=C1Br)Br
-6.1379495	-2.567919	2.51848	3.5700305	1.0515504	CC1=C(C(=CC(=C1F)Br)Br)N	C(=O)C1=C(N=C(S1)Br)Br
-5.9852443	-1.8418448	2.9264328	4.1433992	1.2169664	COC1=CC(=C(C(=C1N)Br)Cl)Br	C1=C(C(=NC=C1Br)Br)C#N
-5.5929046	-1.0208554	3.2039847	4.572049	1.3680644	CCN1C2=C(C=C(C=C2)Br)C3=C1C=CC(=C3)Br	C1=CC2=C(C(=C1)Br)SC3=C2C=CC=C3Br
-6.1999574	-1.4808025	3.2309337	4.719155	1.4882212	COC1=C(C(=NC=C1Br)N)Br	Brc2cccc(c1cccc(Br)n1)n2
-6.5522046	-2.7158074	2.7514274	3.8363972	1.0849698	CC1=CC(=CC(=C1)Br)Br	O=C1C2=C(C)SC(C)=C2C(C2=C(Br)SC(Br)=C21)=O
-6.439868	-1.4162275	3.4622257	5.0236406	1.561415	C1=C(C(=CC(=C1Br)Cl)Br)Cl	C1=CC(=C(C=C1Br)NN)Br
-5.9295993	-2.2451963	2.5997221	3.684403	1.0846808	CCC1=CC(=CC(=C1N)Br)Br	C1=CC(=C(C=C1Br)[N+](=O)[O-])Br
-6.2670035	-1.482835	3.1899018	4.7841682	1.5942664	CC1=C(C=C(C(=C1Cl)Br)Cl)Br	CC1=CC(=C(N=C1Br)Br)N
-6.388651	-2.652547	2.384018	3.736104	1.3520861	C1=CC(=C(C=C1Br)C#N)Br	O=S1(=O)C(Br)=CC=C1Br
-6.2854223	-1.513845	3.358599	4.7715774	1.4129784	COC1=C(C=C(C=C1Br)F)Br	C1=CC(=C(C=C1Br)OC(F)F)Br
-5.9932675	-2.683973	2.136071	3.3092945	1.1732235	C1=C(C(=C(C(=C1F)Br)F)Br)N	O=C1N(C)C2=CC(Br)=CC=C2/C1=C1C2=CC=C(Br)C=C2N(C)C/1=O
-6.096496	-2.4720106	2.3804922	3.6244855	1.2439933	C1=CC(=C(C(=C1Br)C=O)F)Br	C1COC2=C(SC(=C2O1)Br)Br
-6.3167706	-2.173235	2.72455	4.1435356	1.4189856	C1=CC(=C(C=C1Br)Br)C=O	CN1C(=CN=C1Br)Br
-6.078202	-1.9099109	2.8853629	4.168291	1.2829282	CC(C)OC1=C(C=C(C=C1Br)F)Br	C1=C(N=C(S1)Br)Br
-5.8582134	-2.266186	2.4565206	3.5920274	1.1355069	C1=C(SC(=N1)Br)Br	C1=CC2=NNC(=C2C=C1Br)Br
-5.928537	-2.308315	2.4837239	3.6202219	1.136498	COC1=C(C=C(C(=C1)N)Br)Br	CC1=CC(=CC(=C1[N+](=O)[O-])Br)Br
-6.359815	-1.4396886	3.5085168	4.9201264	1.4116096	CC1=CC(=C(C=C1Br)Cl)Br	BrC1=CC=C2C3=CC=C(Br)C=C3OC2=C1
-6.737562	-1.3670161	3.7169902	5.3705463	1.6535561	CC1=C(C=CN=C1Br)Br	CC1=CC(=CC(=C1F)Br)Br
-6.891375	-1.804046	3.6309648	5.087329	1.4563642	C1(=C(C(=C(C(=C1F)Br)F)Br)F)F	CC1=NC(=CC(=C1)Br)Br
-6.1450047	-2.3761506	2.6891353	3.7688541	1.0797188	CC1=CC(=CC(=C1[N+](=O)[O-])Br)Br	CCOC1=C(N=C(C(=C1)N)Br)Br
-6.060846	-1.5814645	3.3007226	4.4793816	1.178659	N#CC(C#N)C3c1cc(Br)ccc1c2ccc(Br)cc23	C1=CC=C(C=C1)OC2=CC(=CC(=C2)Br)Br
-6.7368536	-1.958671	3.4534726	4.7781825	1.3247099	C1=CC2=NC(=NN2C=C1Br)Br	C1=CC(=C(C(=C1Cl)Br)Cl)Br
-5.8579617	-0.9780934	3.2635612	4.8798685	1.6163073	C1=C(C=C(C(=C1Br)N)Br)F	Oc1ccc(Br)cc1Br
-6.4681907	-1.2703719	3.6401992	5.1978188	1.5576196	CC1=C(C=C(C=N1)Br)Br	Brc3ccc(c2ccc(c1ccc(Br)cc1)cc2)cc3
-6.3456683	-1.6801951	3.3668206	4.665473	1.2986524	C1=C(C(=C(C=N1)Br)C#N)Br	C1CCOC(C1)COC2=C(C=C(C=C2)Br)Br
-6.081854	-2.1012034	2.697216	3.9806504	1.2834344	C1=C(N=C(C2=NC=NN21)Br)Br	CC1=CC(=C(N=C1Br)Br)N
-6.829422	-2.7734175	2.4416783	4.0560045	1.6143262	CN1C(=NC(=N1)Br)Br	C1=CC2=C(C=C1Br)C(=O)C3=C(C2=O)C=C(C=C3)Br
-5.9562855	-1.5777503	2.9613514	4.3785353	1.4171839	C1CC2=C(C(=CC(=N2)Br)Br)NC1	C1=C(C=C(C(=C1Cl)Br)F)Br
-5.794847	-2.6782503	2.3328369	3.1165967	0.78375983	C1=CC(=NC(=C1N)Br)Br	C1=C(C2=NSN=C2C(=C1)Br)Br
-6.2793393	-2.3660488	2.5314548	3.9132905	1.3818357	C1=C(C=NC(=C1Br)N)Br	C1(=C(N=C(N1)Br)[N+](=O)[O-])Br
-6.077304	-2.0300274	3.0907154	4.0472765	0.9565611	COC1=CC(=CC(=C1)Br)Br	C1=CC=C(C=C1)C2=NC3=C(C=CC(=C3S2)Br)Br
-6.75712	-3.0479603	1.9557035	3.7091599	1.7534564	CC1=CC(=CC(=C1Br)[N+](=O)[O-])Br	C1=C(C=C2C(=C1Br)NC(=O)C2=O)Br
-5.9476953	-2.989104	1.9209232	2.9585912	1.037668	C1=CC=C(C=C1)C(=S)NC2=C(C=CC(=C2)Br)Br	BrC%23=C%24C(N=C(C%25=N%24)C%26=CC=CC%27=CC=CC%25=C%27%26)=C(Br)S%23
-6.068235	-2.0181625	2.843478	4.0500727	1.2065947	COC1=NC=C(C2=NNC(=C21)Br)Br	C1=C(C(=NC(=C1Br)Cl)N)Br
-7.2789526	-1.9602411	3.6894739	5.3187113	1.6292374	C1(=C(C(=C(C(=C1Br)F)F)Br)F)F	Fc1cc(Br)c(Br)cc1F
-5.5667095	-1.5649165	2.6434398	4.001793	1.3583531	CC1=CC(=C(C=C1Br)N)Br	C1=C(SC(=N1)Br)Br
-5.7247868	-1.4446331	2.9717572	4.2801538	1.3083966	Oc1ccc2cc(Br)ccc2c1c3c(O)ccc4cc(Br)ccc34	BrCc1ccc(CBr)cc1
-5.769051	-1.1470704	3.2029433	4.6219807	1.4190373	C1=CC2=C(C=C1Br)C3=C(N2)C=CC(=C3)Br	[C-]#[N+]c1ccc(Br)cc1Br
-5.9011602	-1.5732715	2.8165216	4.3278885	1.5113668	CC1=CC(=C(C=C1Br)N)Br	CC1=CC(=NN=C1Br)Br
-6.1408076	-1.2631038	3.3898518	4.8777037	1.4878519	C1CC(=O)NC2=C(C=C(C=C21)Br)Br	Brc3ccc(c2ccc(c1ccc(Br)cc1)cc2)cc3
-6.6665435	-1.4640174	3.5573235	5.202526	1.6452026	C1=C(C=C(C=C1Br)Br)OC(F)F	C1=C(C(=C(C(=N1)Cl)Br)N)Br
-5.9614487	-2.1076589	2.4456666	3.8537898	1.4081233	CC1=CN2C=C(N=C(C2=N1)Br)Br	C1=C(OC(=C1)Br)Br
-5.61504	-1.650921	2.6523826	3.964119	1.3117363	COC1=CC(=C(C(=C1)Br)N)Br	C1=C(N=C(S1)Br)Br
-6.566922	-1.026726	3.7758596	5.5401964	1.7643368	C1=CC(=C(C(=C1)Br)CN)Br	C1=C(C=C(C=C1Br)Br)C(F)F
-6.449537	-2.0268102	3.3103914	4.4227266	1.1123352	C1=CC2=C(C=CC(=C2)Br)C=C1Br	C1=C(C(=CN=C1Br)Cl)Br
-6.718214	-2.4828093	2.9749439	4.235405	1.2604611	CC1=CC(=CC(=C1[N+](=O)[O-])Br)Br	C1=CC2=C(C=C1Br)C3=C(O2)C=CC(=C3)Br
-6.74375	-1.2321662	3.8986788	5.511584	1.612905	C1=C(C=C(C(=C1Br)Cl)Br)Cl	CC1=C(C=CC(=C1C)Br)Br
-6.215444	-2.0429387	3.0084832	4.1725054	1.1640222	C1=C(C=C(C=C1Br)Br)C=O	C1=CC2=C(C=CC(=C2)Br)C=C1Br
-8.1303625	-4.595095	2.6865146	3.5352674	0.84875274	BrC%63=C%64C(C(N(C)C%64=O)=O)=C(Br)C%65=C%63C(N(C)C%65=O)=O	BrC1=C([N+]([O-])=O)C([N+]([O-])=O)=C(Br)C2=NSN=C12
-6.7328477	-1.5076855	3.7360868	5.225162	1.4890752	C1=C(C=C(C=C1Br)Br)C(F)(F)F	CC1=C(C(=C(C(=C1Br)C)C)Br)C
-6.010166	-1.9989508	2.8507357	4.011215	1.1604795	C1=CC2=NNC(=C2C=C1Br)Br	C1=CC2=C(C=CN=C2C=C1Br)Br
-6.393643	-1.9405501	3.015366	4.4530926	1.4377265	C1=CC(=C(C(=C1)Br)C(F)(F)F)Br	CC1=CN2C=C(N=C(C2=N1)Br)Br
-7.051998	-2.835724	2.7641413	4.2162743	1.4521329	C1=C(C(=CC(=C1Br)C=O)Br)C=O	C1=CC(=C(C(=C1Br)F)Cl)Br
-5.7280054	-1.8963697	2.6134088	3.8316357	1.2182269	C1=C(C=C(C(=C1Br)N)OC(F)(F)F)Br	Br/C=C/C%30=CC=C(Br)S%30
-6.721858	-3.422226	2.3884368	3.299632	0.9111953	C1=CN=C(C(=C1Br)[N+](=O)[O-])Br	FC1=C(C2=CC(C)=C(Br)S2)C2=NSN=C2C(C2=CC(C)=C(Br)S2)=C1F
-5.867112	-1.9079953	2.8771157	3.959117	1.0820012	CC1=CC(=C(C=C1Br)Br)N	C1=C(C=NC2=CC(=CN=C21)Br)Br
-6.0475864	-2.8135233	2.2578483	3.2340631	0.9762149	C1=C(C=C(C=C1Br)Br)C(=O)Cl	O=C1N(C)C(C2=CC=C(Br)C=C2)=C2C1=C(C1=CC=C(Br)C=C1)N(C)C2=O
-5.880356	-1.6072506	2.9549003	4.273105	1.3182049	CC1=CC(=C(C=C1Br)Br)N	CC(=O)C1=C(C=C(C=C1)Br)Br
-6.0135274	-2.1405547	2.507986	3.8729727	1.3649867	CC(=S)NC1=C(C=CC(=C1)Br)Br	C1=CC2=C(C=CN=C2C3=NC=CC(=C31)Br)Br
-6.0517817	-1.892276	2.7956913	4.159506	1.3638146	CC1=C(C(=NC=C1Br)N)Br	C1=CN2C(=CN=C(C2=N1)Br)Br
-5.920421	-1.6957319	2.7676802	4.2246895	1.4570093	C1=C(C2=NC=C(N2C=C1Cl)Br)Br	CC1=C(C=C(C(=O)N1C)Br)Br
-6.0171537	-1.6247548	2.8882155	4.392399	1.5041833	C1=C(C2=NC=C(N2C=C1Cl)Br)Br	CC1=CC(=C(N=C1Br)C)Br
-6.4266095	-2.5136743	2.3381386	3.9129353	1.5747967	CC1=CC(=C(C(=C1[N+](=O)[O-])Br)N)Br	C1=CC(=C(C(=C1)Br)Cl)Br
-6.5165763	-2.6218295	2.4827468	3.8947468	1.412	CC1=C(C=C(C(=C1Cl)Br)Cl)Br	O=CC%73=CC(S%74)=C(S%73)C%75=C%74C(Br)=C(C(SC(C=O)=C%76)=C%76S%77)C%77=C%75Br
-6.1862345	-1.7820655	2.8297505	4.404169	1.5744185	C1=CC(=NC(=C1F)Br)Br	C1=C(C2=NC=C(N2C=C1Cl)Br)Br
-6.5824313	-1.7388287	3.2809887	4.8436027	1.562614	CCC1=CC(=CC(=C1Br)CC)Br	C1=C(C=NC(=N1)Br)Br
-6.5894737	-2.3823032	2.8389602	4.2071705	1.3682103	C1=CN2C(=N1)C(=CC(=N2)Br)Br	C1=C(C=C(C(=C1Br)F)C=O)Br
-7.260906	-2.636351	3.1712003	4.624555	1.4533548	C1=C(C(=C(C(=C1Br)F)[N+](=O)[O-])Br)F	C1=C(C=C(C=C1Br)Br)C#N
-6.316743	-1.9627267	3.2876158	4.3540163	1.0664005	C1=C(C=C2C(=C1Br)N=C(S2)Cl)Br	C1=CC2=C(C=C1Br)C3=C(O2)C=CC(=C3)Br
-6.462764	-1.8775457	3.2021973	4.585218	1.3830206	C1=C(C=C(C(=C1Br)F)F)Br	C1=C(N=C(S1)Br)Br
-5.8436737	-1.5687683	2.7992728	4.274905	1.4756324	C1=CC(=NC(=C1N)Br)Br	C1=C2C(=C(C(=C1Br)N)Br)OC(O2)(F)F
-5.93962	-1.9943403	2.7015316	3.9452796	1.243748	C1=C(C(=C(C(=C1Br)N)Br)F)Cl	BrC%90=C(F)C%91=C(C(SC(Br)=C%92F)=C%92S%91)S%90
-6.2652965	-1.6811967	3.0938501	4.5841	1.4902496	CC1=NC(=C(C=C1Br)Br)F	BrC1=C2C(OCCO2)=C(Br)S1
-5.90192	-0.9303949	3.4369216	4.971525	1.5346036	CC1=CC(=C(C(=C1)Br)F)Br	CC1=C(C=CC(=C1Br)N)Br
-5.959736	-2.480081	2.569635	3.4796548	0.9100199	CC1=NC2=C(N=C1C)C(Br)=CC=C2Br	CC(C)(C)c1cc2ccc3c(Br)cc(Br)c4ccc(c1)c2c34
-5.8344097	-1.3239658	3.0986679	4.5104437	1.4117758	COC1=CC(=C(C(=C1N)Br)Cl)Br	C1=C(C=C(N=C1N)Br)Br
-6.8147383	-1.6704307	3.6974297	5.1443076	1.446878	FC(F)Oc1cc(Br)c(Cl)c(Br)c1	N#CCS(=O)(C1=CC(Br)=CC=C1Br)=O
-6.221536	-2.9107347	1.9205592	3.3108015	1.3902423	C1=C(C=C(C=C1Br)Br)OC(F)(F)F	O=C1N(C)C2=CC(Br)=CC=C2/C1=C/C=C1C2=CC=C(Br)C=C2N(C)C/1=O
-7.217848	-3.0861213	2.7758074	4.1317263	1.3559189	C1=C(C(=NC=C1Br)Br)[N+](=O)[O-]	C1=C(C(=CN=C1Br)C=O)Br
-6.23189	-1.6846383	3.4384217	4.5472517	1.10883	C1=CC(=C(C=C1Br)C(F)(F)F)Br	COc1cc(Br)c(Br)cc1OC
-6.590897	-2.2721121	2.898515	4.3187847	1.4202697	CC1=C(C=C(C=C1F)Br)Br	C1=CC2=NC(=NC=C2C=C1Br)Br
-5.7963257	-1.2392648	3.1237607	4.5570607	1.4333	CS(=O)(=O)C1=CC(=C(C(=C1)Br)N)Br	C1=C(C=C(C(=C1Br)N)OC(F)F)Br
-6.153732	-1.5861685	3.2020588	4.567563	1.3655043	C1=CC=C(C=C1)C2=C(C=C(C=C2)Br)Br	CC1=CN2C=C(N=C(C2=N1)Br)Br
-6.1068206	-1.8621106	2.9410377	4.24471	1.3036723	CC(=O)NC1=CC(=CC(=C1)Br)Br	C1=C(C2=NC(=CN=C2N1)Br)Br
-7.0583463	-2.5652297	3.161536	4.4931164	1.3315804	C1=CC(=C(C(=C1F)Br)F)Br	C1=C(C=C(C=C1Br)Br)[N+](=O)[O-]
-5.901304	-2.1338181	2.531323	3.7674856	1.2361627	C1=CC(=C(C=C1Br)NN)Br	C1=C(N=C(S1)Br)Br
-6.335489	-2.5506399	2.9511409	3.784849	0.83370805	C1=CC=C(C(=C1)Br)Br	BrC(OC(Br)=C/1)=CC1=C(C#N)\C#N
-6.2297106	-1.3779131	3.3871472	4.8517976	1.4646504	C1=C(C=C(N=C1Br)Br)N	COC1=CC(=NC(=C1)Br)Br
-5.5971494	-1.8318015	2.6769114	3.765348	1.0884366	BrC4=CC5=C(SC(Br)=C5)S4	BrC#CC#CBr
-5.9771757	-1.3848679	3.1932397	4.592308	1.3990684	COC1=C(C(=CC(=N1)Br)Br)N	CC1=C(C=C(C(=N1)C)Br)Br
-6.3066335	-2.316455	2.4829128	3.9901786	1.5072658	C1=C(C=NC(=C1Br)N)Br	BrC%93=NN=C(Br)C=N%93
-6.7674775	-2.5684404	2.9065773	4.199037	1.2924597	C1(=C(C(=C(C(=C1Br)Cl)F)Cl)Br)N	C1=C(N=C(C(=N1)Cl)Br)Br
-6.7858253	-2.1806586	3.284286	4.6051664	1.3208804	C1=CN=C(C=C1Br)C2=NC=CC(=C2)Br	C1=C(C(=CN=C1Br)Br)F
-5.6701727	-2.2971747	2.3685799	3.372998	1.0044181	C1(=C(N=C(C(=N1)Cl)Br)Br)N	BrC(S%19)=C(C)C%20=C%19C(SC%21=C%22SC(Br)=C%21C)=C%22S%20
-5.200417	-1.4535773	2.4895992	3.7468398	1.2572405	C1=CC(=NC(=C1N)Br)Br	BrC(S%16)=CC%17=C%16C(SC(Br)=C%18)=C%18N%17C
-6.616207	-1.6737789	3.7041242	4.942428	1.2383039	C1=C(C=C(C=C1Br)Br)OC(F)(F)F	CC1=C(C=C(C=C1)Br)Br
-6.9126215	-4.007884	2.0638723	2.9047375	0.84086514	C12=C(SC(=C1C(=O)OC2=O)Br)Br	O=C(N1)C2=C3C(C4=C(Br)C=C3C1=O)=C(C1=C3C(C5=CC=C34)=C(C(NC5=O)=O)C=C1Br)C=C2
-5.8973083	-1.4504033	2.9913769	4.446905	1.4555283	C1=CC=C(C=C1)CN2C(=NC(=N2)Br)Br	Oc1ccc2cc(Br)ccc2c1c3c(O)ccc4cc(Br)ccc34
-6.0435143	-2.0859265	2.791077	3.9575877	1.1665108	C1=C(C(=C(C(=N1)N)Br)C(F)(F)F)Br	BrC#CBr
-5.536799	-1.8597112	2.752091	3.6770878	0.92499685	C1=CC2=C(C=CC3=C2C4=C1C=CC(=C4C=C3)Br)Br	C1=CC2=C(N=C(C=C2C=C1Br)N)Br
-5.9170904	-1.8681822	2.8248637	4.048908	1.2240446	C1=CC(=C(C(=C1Br)N)N)Br	C1=CC(=C(C(=C1)Br)C2=C(N=C3C(=C2)C=NC(=N3)N)N)Br
-6.358901	-0.85390043	3.820288	5.5050006	1.6847126	CC1=CC(=CC(=C1Br)C)Br	CCC1=C(C=CC(=C1)Br)Br
-7.180711	-2.9812949	2.9710732	4.199416	1.228343	C1=C(C=C(N=C1Br)Br)[N+](=O)[O-]	BrC1=NOC(Br)=C1
-6.0203815	-2.1640477	2.6674752	3.8563337	1.1888585	CC1=C(C(=CC(=C1F)Br)Br)N	C1=C(C=C(N=C1Br)Br)C=O
-5.8158073	-1.9092828	2.6592312	3.9065247	1.2472935	C1=CC2=NNC(=C2C=C1Br)Br	O=S(OC)(C1=CC(Br)=CC=C1C1=CC=C(Br)C=C1S(OC)(=O)=O)=O
-6.8532734	-3.1016579	2.8690472	3.7516155	0.88256836	C1(=C(C2=NSN=C2C(=C1F)Br)Br)F	C1=C(C=C(C(=C1Br)Cl)C(F)(F)F)Br
-5.675493	-2.0276082	2.5662837	3.6478846	1.0816009	C1=C(C=C(C(=C1Br)N)Br)OC(F)F	BrC%90=C(F)C%91=C(C(SC(Br)=C%92F)=C%92S%91)S%90
-5.6775746	-1.2059896	3.1587849	4.4715853	1.3128004	COC1=C(C=C(C(=C1)N)Br)Br	CC(C)OC1=CC(=CC(=C1)Br)Br
-6.8346233	-2.840178	2.3658497	3.9944453	1.6285956	C1=C(N=C(C(=N1)Br)C=O)Br	Brc2cccc(c1cccc(Br)n1)n2
-6.393092	-2.5277624	2.5358195	3.8653297	1.3295102	C1=C(C=C(C(=C1Br)N)Br)F	C1(=C(N=C(N1)Br)[N+](=O)[O-])Br
-6.4110775	-3.7186584	1.9318464	2.692419	0.7605727	C1=C(N=CC(=N1)Br)Br	BrC1=C(N=C(C)C(C)=N2)C2=C(Br)C2=NSN=C12
-6.018612	-1.8129778	2.9421132	4.205634	1.263521	C1=C(C=C(C=C1Br)Br)F	CC1=C(N=C(S1)Br)Br
-6.0626397	-2.2166913	2.6575577	3.8459485	1.1883907	C1=CC2=NC(=NC=C2C=C1Br)Br	C1=C(C2=NC=C(N2C=C1Cl)Br)Br
-6.919789	-2.4017506	2.9034717	4.5180383	1.6145666	C1=C(C=C(C(=C1Br)Cl)Br)Cl	C1=CC(=C(C(=C1Br)C=O)F)Br
-5.9357696	-1.7325261	2.9017088	4.2032433	1.3015344	C1=CC=C2C(=C1)C3=C(C=CC(=C3)Br)C4=C2C=C(C=C4)Br	C1=C2C(=C(C(=C1Br)N)Br)OC(O2)(F)F
-5.7861104	-1.9722966	2.77626	3.8138137	1.0375538	BrC1=CC2=CC=C3C(N=CC(Br)=C3)=C2N=C1	Brc1sc(Br)cc1
-6.4902964	-1.9863017	3.033738	4.503995	1.470257	COC1=C(C(=C(C=C1Br)Br)F)F	CC1=NC(=NC=C1Br)Br
-5.6173215	-1.6229304	2.7150285	3.994391	1.2793624	C1=CC(=C(C=C1Br)Br)Cl	BrC(S%13)=CC%14=C%13C(SC(Br)=C%15)=C%15C%14(C)C
-5.94785	-1.3095077	3.1828723	4.6383424	1.4554701	C1=CC(=C(C=C1Br)S)Br	CC1=CC(=NC(=C1)Br)Br
-6.273504	-1.8183372	2.917255	4.455167	1.5379119	C1=C(C(=C(C(=C1Br)N)Br)F)Cl	CC(=O)C1=C(C=C(C=C1)Br)Br
-6.175491	-1.9566816	3.1312225	4.218809	1.0875866	C1=C(C=C(N=C1Br)Br)Cl	C1COCCC12C3=C(C=CC(=C3)Br)C4=C2C=C(C=C4)Br
-6.658966	-2.5046933	2.84007	4.154273	1.314203	C1=C(C(=C(C(=C1Br)F)[N+](=O)[O-])Br)F	CC1(C2=CC(=CC(=C2NC1=O)Br)Br)C
-5.9943123	-2.872039	2.0688972	3.1222732	1.053376	CC1=CC(=C(C(=C1)Br)C)Br	O=C1N(C)C2=CC(Br)=CC=C2/C1=C1C2=CC=C(Br)C=C2N(C)C/1=O
-6.5864697	-1.9182782	3.2553039	4.6681914	1.4128876	C1=C(C2=NC=NN2C=C1Br)Br	CC1=NC(=CC(=C1)Br)Br
-6.34386	-1.6036505	3.2836952	4.7402096	1.4565144	C1=C(C=C(C=C1Br)Br)CC#N	C1=CC2=C(C(=C1)Br)OC3=C2C=CC=C3Br
-6.0265613	-2.2444386	2.6198547	3.7821226	1.1622679	C1=C(N=C(C(=N1)Cl)Br)Br	C1=C(C=C2C(=C1Br)C(=NN2)N)Br
-6.5832896	-1.9655446	3.2009907	4.617745	1.4167542	COC1=C(C(=C(C=C1Br)Br)F)F	C1=CN=C(N=C1Br)Br
-6.1976175	-2.5981507	2.5130875	3.5994668	1.0863793	CCC1=CC(=CC(=C1N)Br)Br	C1=C(C(=NC=C1Br)Br)[N+](=O)[O-]
-7.00013	-3.041982	2.6210618	3.9581482	1.3370864	C1=C2C=C(C=NC2=C(C=C1[N+](=O)[O-])Br)Br	BrC%93=NN=C(Br)C=N%93
-6.6276526	-1.7123222	3.44998	4.9153304	1.4653504	CC1=CC(=C(C=C1Br)C)Br	C1=C(N=CN=C1Br)Br
-6.1133327	-2.1938682	2.8051612	3.9194646	1.1143034	C1=CNC2=C1C(=NC=C2Br)Br	Brc1ccc(cc1)C(=O)c2ccc(Br)cc2
-7.1898837	-2.7125301	2.9479966	4.4773536	1.529357	CC1=C(C=C(C=C1[N+](=O)[O-])Br)Br	C1=CN=C(C(=C1Br)C=O)Br
-5.955241	-2.2366533	2.6097288	3.7185879	1.1088591	C1=C(C(=C(C=N1)Br)C=O)Br	C1=C2C(=CN=C1Br)C(=CN2)Br
-5.7895393	-1.8017812	2.7652452	3.9877582	1.222513	COC1=C(C(=CC(=N1)Br)Br)N	BrC1=CC=C(C(C=CC(Br)=C2)=C2B2C3=CC=C(C#N)C=C3)C2=C1
-6.590388	-2.3862615	2.8247666	4.2041264	1.3793597	C1=CC(=NC(=C1)Br)Br	C1=C(C=NC2=CC(=CN=C21)Br)Br
-6.0801535	-1.7981328	2.865558	4.2820206	1.4164627	C1=CC(=C(C(=C1F)Br)F)Br	CN(C)C1=NC=C(N=C1Br)Br
-6.074063	-1.3740396	3.2124608	4.700023	1.4875624	CC1=C(C(=C(C(=C1Br)C)C)Br)C	CN1C=C(C=C(C1=O)Br)Br
-6.545086	-2.4334188	2.9086566	4.111667	1.2030106	C1=C(N2C=C(N=C(C2=N1)Br)Br)Cl	BrC1=NC2=CC=C(Br)C=C2O1
-5.8015194	-1.9405338	2.9793842	3.8609858	0.8816016	C1=CC(=C2C(=C1Br)N=C(S2)Cl)Br	C1=CC=C(C=C1)N2C3=C(C=CC(=C3)Br)C4=C2C=C(C=C4)Br
-5.9062295	-1.1180705	3.2216802	4.788159	1.5664787	C1=C(C(=C(C(=C1F)Br)F)Br)F	C1=CC(=C(C(=C1Br)N)N)Br
-5.90665	-2.1739092	2.583115	3.7327409	1.1496258	C1=C(N=C(N=C1Br)N)Br	BrC%69=C(OC)C(OC)=C(Br)S%69
-6.0455785	-1.3223588	3.2468936	4.72322	1.4763262	C1COC2=CC(=CC(=C2C1N)Br)Br	C1=C(C=C(C(=C1Br)N)C(F)(F)F)Br
-6.610139	-1.9398261	3.068425	4.670313	1.601888	CC1=NC(=NC=C1Br)Br	C1=C(C(=C(C(=N1)Cl)Br)N)Br
-5.70709	-2.9646816	1.7175473	2.7424083	1.024861	O=C1NC(C2=CC3=C(Br)SC(Br)=C3C=C21)=O	O=C1N(C)C(C2=CC=C(Br)C=C2)=C2C1=C(C1=CC=C(Br)C=C1)N(C)C2=O
-5.8817706	-1.8800691	2.6729798	4.0017014	1.3287215	C1=CC=C2C(=C1)C(=CN=C2Br)Br	CC1=CC(=NC(=C1N)Br)Br
-6.46245	-2.3749619	2.8291993	4.087488	1.2582889	C1=C(N2C=C(N=C(C2=N1)Br)Br)Cl	C1=CC2=C(C=CN=C2C(=C1)Br)Br
-6.4502215	-2.0680418	3.0253778	4.3821797	1.356802	C1=C(C=NC(=C1Br)F)Br	C1=C(C2=NC(=CN=C2N1)Br)Br
-6.048773	-2.0636768	2.5969825	3.985096	1.3881135	C1=CN2C(=NC(=N2)Br)C=C1Br	CC(C)(C)N=[N+](C1=CC(=CC(=C1N)Br)Br)[O-]
-6.4620233	-2.7625864	2.4496207	3.699437	1.2498162	O=c2c1cc(Br)ccc1c3ccc(Br)cc23	C1=CC2=NC(=NC=C2C=C1Br)Br
-5.233083	-2.0328016	2.1584983	3.2002811	1.0417829	CN1C=C(C(=O)C(=C1)Br)Br	BrC(S%13)=CC%14=C%13C(SC(Br)=C%15)=C%15C%14(C)C
-6.5158997	-2.3969781	2.9066837	4.1189213	1.2122376	C1=CC2=C(C=C1Br)N=C(S2)Br	C1=C(N=C(C2=NC=NN21)Br)Br
-6.8183312	-3.1325088	2.3023386	3.6858225	1.3834839	C1(=C(NN=C1Br)Br)[N+](=O)[O-]	BrC1=C(N=C(C)C(C)=N2)C2=C(Br)C2=NC(C)=C(C)N=C12
-6.4970946	-3.001212	2.286203	3.4958827	1.2096798	C1=C(C=NC2=C(C=NN21)Br)Br	BrC%63=C%64C(C(N(C)C%64=O)=O)=C(Br)C%65=C%63C(N(C)C%65=O)=O
-6.03241	-2.0960343	2.745098	3.9363759	1.1912777	C1=CC(=C(C(=C1Br)C=O)F)Br	C1=CC=C(C=C1)N2C3=C(C=CC(=C3)Br)C4=C2C=C(C=C4)Br
-6.41328	-1.8469806	3.1542985	4.5662994	1.4120009	C1=C(C=C(C=C1Br)Br)F	C1=CC(=C2C=NC=CC2=C1Br)Br
-6.575158	-2.0212693	3.2190378	4.553889	1.334851	C1=C(C(=C(C(=C1F)Br)F)Br)F	C1=CC2=C(C=CN=C2C(=C1)Br)Br
-5.185715	-2.288426	2.0059714	2.8972893	0.89131784	BrC(S6)=CC7=C6C(SC(Br)=C8)=C8S7	BrC%69=C(OC)C(OC)=C(Br)S%69
-5.610115	-0.99943995	3.20559	4.610675	1.4050848	CC1=CC(=CC(=C1N)Br)Br	COC1=CC(=C(C(=C1)Br)N)Br
-5.6844044	-1.137529	3.189755	4.5468755	1.3571205	COC1=C(C=CC=C1Br)Br	C1=C2C(=CN=C1Br)C(=CN2)Br
-5.95167	-2.2357333	2.4695158	3.715937	1.2464211	C1=C(C(=C(C(=N1)Br)N)N)Br	O=C%59C%60=C(Br)SC(Br)=C%60C(N%59C)=O
-6.9426475	-2.2913144	2.805486	4.651333	1.8458469	C1=C(C=C(C(=C1Br)F)Cl)Br	C1=CC(=C(C=C1Br)Br)C=O
-6.728743	-2.425642	2.986878	4.303101	1.3162231	CC1=CC(=C(N=C1Br)Br)C	CC1=NC(=NC=C1Br)Br
-6.7114286	-3.7020738	2.121863	3.0093548	0.88749194	C1=C(C=C(N=C1Br)Br)Cl	O=C(N1)C2=C3C(C4=C(Br)C=C3C1=O)=C(C1=C3C(C5=CC=C34)=C(C(NC5=O)=O)C=C1Br)C=C2
-6.3350644	-1.3392622	3.401402	4.995802	1.5943999	C1=C(C(=C(C(=C1Br)N)Br)F)Cl	CC1=C(C(=NC(=C1Br)C)C)Br
-7.0155945	-2.8930516	2.7047222	4.122543	1.4178207	C1=CC(=C(C=C1Br)Br)F	C1(=C(SC(=C1[N+](=O)[O-])Br)Br)[N+](=O)[O-]
-6.059357	-1.2319698	3.3522816	4.8273873	1.4751058	C1=C(C(=CC(=C1Br)Cl)Br)F	CC1=C(C=C(C=C1N)Br)Br
-6.2702184	-2.2281291	2.8355134	4.0420895	1.2065761	COC1=C(C=C(C(=C1Br)N)Cl)Br	C1=CN=C(C2=C1N=C(S2)Br)Br
-6.075259	-1.6903619	3.1080632	4.384897	1.276834	C1=C(C=C(C=C1Br)Br)OC(F)(F)F	C1=C(C=C(C(=C1Br)N)Br)OC(F)F
-6.686547	-2.788515	2.600809	3.8980317	1.2972226	C1=CN2C(=N1)C(=CC(=N2)Br)Br	C1(=NN=C(S1)Br)Br
-5.1353807	-1.4210112	2.4500582	3.7143695	1.2643113	CCCCC1=C(SC(=C1)Br)Br	BrC%70=CC=C(Br)N%70C
-6.5014167	-2.414876	2.9983602	4.0865407	1.0881805	CC1=CC(=C(C(=C1[N+](=O)[O-])Br)I)Br	BrC(C=C1)=CC2=C1C(C1=CC=CC=C1C(OC)=O)C(C=CC(Br)=C1)=C1O2
-5.78972	-1.7674009	2.772798	4.0223193	1.2495213	C1=C(C=NC2=NNC(=C21)Br)Br	C1=C(C=C2C(=C1Br)N=C(S2)N)Br
-6.390507	-2.1824064	2.7250113	4.208101	1.4830894	C1=C(C2=NNC(=C2C=N1)Br)Br	C1=C(C=C(C(=C1Br)F)Br)Cl
-6.4106874	-2.760917	2.5506132	3.6497705	1.0991573	BrC%28=NC%29=C(N=C(Br)S%29)S%28	Brc1ccc(cc1)C(=O)c2ccc(Br)cc2
-5.65873	-2.1011055	1.5870137	3.5576246	1.9706109	C1=CC(=C(C=C1Br)Br)N	CS(=NC1=C(C=C(C=C1[N+](=O)[O-])Br)Br)(=O)C
-5.9657016	-1.1312923	3.3822365	4.834409	1.4521728	Oc1ccc(Br)cc1Br	Brc1ccc(cc1)c2ccc(Br)cc2
-6.1393414	-1.5055174	3.2741299	4.633824	1.359694	C1=CC(=C(C=C1Br)C(F)(F)F)Br	CC1=CC(=C(C(=C1Cl)Br)N)Br
-6.374599	-3.612566	2.1302273	2.762033	0.63180566	C1=CN2C(=CN=C(C2=N1)Br)Br	C1=C(C2=NSN=C2C(=N1)Br)Br
-5.654859	-1.5868114	2.9938357	4.0680475	1.0742118	C1=C2C=C(SC2=CC3=C1SC(=C3)Br)Br	C1CCOC(C1)COC2=C(C=C(C=C2)Br)Br
-6.2231865	-1.9830397	3.0888212	4.2401466	1.1513255	Cc3ccc(c2ccc1cc(Br)cc(Br)c1n2)cc3	C1=C(C(=C(C(=C1Br)Cl)Br)N)Cl
-7.176147	-2.5590386	3.2295036	4.6171083	1.3876047	C1(=C(NN=C1Br)Br)[N+](=O)[O-]	CC1=C(C=C(C=N1)Br)Br
-6.0744257	-2.2492151	2.7914848	3.8252106	1.0337257	C1=CC2=NC(=NC=C2C=C1Br)Br	COc1cc(Br)c(OC)cc1Br
-6.1209335	-2.0291257	2.820707	4.091808	1.2711008	C1COCCN1C2=CC(=CC(=C2)Br)Br	C1=CN=C(C(=C1Br)C#N)Br
-6.7140408	-2.9177618	2.7474341	3.796279	1.0488448	C1(=C(SC(=C1[N+](=O)[O-])Br)Br)[N+](=O)[O-]	C1=CC2=C(C=CC(=C2)Br)C=C1Br
-6.1774626	-1.7466724	3.1966043	4.43079	1.2341857	C1=CC=C2C(=C1)C3=C(C=CC(=C3)Br)C4=C2C=C(C=C4)Br	CC1=NC(=CC(=C1)Br)Br
-6.5409837	-2.252438	2.822565	4.2885456	1.4659805	C1=C(C=NN=C1Br)Br	C1=CC(=C(C=C1Br)N=C=S)Br
-5.8777018	-1.1481471	3.157934	4.7295547	1.5716207	CC(C)(C)C(=O)NC1=CC(=CC(=C1)Br)Br	C1=CC(=C(C(=C1Br)N)N)Br
-5.412102	-1.8248456	2.483843	3.5872567	1.1034136	C1=C(C=C2C(=C1Br)C(=NN2)N)Br	COC%31=C%32C(C=C(Br)S%32)=C(OC)C%33=C%31C=C(Br)S%33
-6.103374	-1.0501096	3.266406	5.0532646	1.7868586	C1=C(C(=C(C(=C1Br)N)Br)F)F	Brc1cccc(Br)c1
-5.852602	-1.3299304	3.1612144	4.5226717	1.3614573	C1=CC2=C(C=C1Br)C3=C(N2)C=CC(=C3)Br	CC1=NC(=CC(=C1)Br)Br
-6.6319704	-2.4452357	2.988017	4.1867347	1.1987176	C1=CC(=C(C(=C1)Br)[N+](=O)[O-])Br	C1=CC2=C(C=CC(=C2N=C1)Br)Br
-5.829856	-2.0314033	2.623903	3.7984526	1.1745496	C1CC2=C(C(=CC(=N2)Br)Br)NC1	CC(C)(C)N=[N+](C1=CC(=CC(=C1N)Br)Br)[O-]
-5.9617953	-1.2612944	2.9929085	4.700501	1.7075925	CC1=CC(=C(C(=C1C)Br)N)Br	C1=CC=C(C=C1)CN2C(=NC(=N2)Br)Br
-7.248703	-2.6509385	3.1127455	4.5977645	1.485019	CC1=CC(=C(C(=C1)Br)[N+]#[C-])Br	C1=C(C=C(C(=C1Br)[N+](=O)[O-])Br)Cl
-5.8496304	-1.6362845	2.801491	4.213346	1.411855	C1=CC(=C(C(=C1)Br)CC#N)Br	BrC1=C2OC(C)C(C)OC2=C(Br)S1
-6.568454	-2.5964403	2.4850266	3.9720135	1.4869869	C1=C(C=C(C=C1Br)Br)C#N	O=c2c1cc(Br)ccc1c3ccc(Br)cc23
-6.438731	-2.518076	2.4463928	3.9206553	1.4742625	CC1=CC(=C(C(=C1[N+](=O)[O-])Br)N)Br	O=n1cc(Br)ccc1Br
-7.322385	-2.7261198	2.9675894	4.596265	1.6286755	CN1C(=NC(=N1)Br)Br	C1=CN=C(C(=C1Br)[N+](=O)[O-])Br
-6.2559834	-1.2759819	3.5077803	4.9800014	1.4722211	CC1=CC(=C(C=C1Br)Br)OC	C1=C(C=C(C(=C1Br)F)Cl)Br
-5.719562	-1.8031068	2.573349	3.9164553	1.3431063	C1=CC(=C(C=C1Br)OC(F)F)Br	BrC%34=CC%35=C(Br)SC=C%35S%34
-5.965909	-1.2732902	3.2517858	4.692619	1.4408331	CC1=C(C(=C(C=C1Cl)Br)N)Br	COc1cc(Br)c(OC)cc1Br
-6.59111	-2.4470797	2.7124963	4.1440306	1.4315343	C1=CC2=C(C=C1Br)C(=CO2)Br	C1=CN=C(C(=C1Br)[N+](=O)[O-])Br
-6.51748	-1.6355817	3.4925265	4.881898	1.3893714	C1=C(C=C(N=C1Br)Br)Cl	C1=CC=C(C=C1)C2=CC(=CC(=C2)Br)Br
-6.0775914	-2.4286342	2.4475908	3.6489573	1.2013664	CC1=CC(=C(C(=C1N)Br)Cl)Br	O=CC%73=CC(S%74)=C(S%73)C%75=C%74C(Br)=C(C(SC(C=O)=C%76)=C%76S%77)C%77=C%75Br
-6.883895	-1.9326688	3.5341756	4.951226	1.4170506	CC1=C(C=C(C=C1Br)S(=O)(=O)C(F)(F)F)Br	Brc2cccc(c1cccc(Br)n1)n2
-6.02271	-2.8791285	2.0494027	3.1435814	1.0941787	CC1=CC(=C(C(=C1N)Br)F)Br	C1=CC2=C(C=C1Br)C(=O)C(=O)C3=C2C=CC(=C3)Br
-5.0137086	-2.3910618	1.9809253	2.6226468	0.6417215	BrC(S%13)=CC%14=C%13C(SC(Br)=C%15)=C%15C%14(C)C	BrC%90=C(F)C%91=C(C(SC(Br)=C%92F)=C%92S%91)S%90
-6.0653872	-1.5694363	3.1041124	4.4959507	1.3918383	CC1=C(C(=CC(=C1F)Br)Br)N	CC1=NC(=NC=C1Br)Br
-6.3187156	-2.5165703	2.492042	3.8021452	1.3101032	C1=C(C=C(C(=C1Br)N)Br)C(F)(F)F	C1=C(N2C(=NC=N2)C(=N1)Br)Br
-6.554751	-2.0779772	2.7962058	4.4767737	1.680568	CC(=O)C1=CC(=CC(=C1NC(=O)C)Br)Br	Brc1ccc(cc1)c2ccc(Br)cc2
-5.9862576	-1.372596	3.132239	4.613662	1.4814227	CC1=C(C=CC(=C1Cl)Br)Br	CCCCC1=C(SC(=C1)Br)Br
-6.8534594	-1.9512881	3.5596335	4.902171	1.3425376	C1=C(C=C(N=C1Br)Br)Cl	O=S(OC)(C1=CC(Br)=CC=C1C1=CC=C(Br)C=C1S(OC)(=O)=O)=O
-6.42201	-2.0413892	3.1576254	4.380621	1.2229955	C1(=C(C(=C(C(=C1Br)Cl)F)Cl)Br)N	C1=CC2=CC(=CN=C2C3=NC=C(C=C31)Br)Br
-6.4913425	-3.0765212	2.3765063	3.4148214	1.038315	C1=C(C(=C(C(=C1Br)N)Br)F)Cl	CN(C9=O)C(C%10=C(Br)C=C%11C%12=C(C(N(C)C%11=O)=O)C(Br)=CC9=C%12%10)=O
-6.2482896	-2.9441814	2.3085585	3.3041081	0.9955497	C1=CSC(=C1Br)C2=C(C=CS2)Br	C(=O)C1=C(N=C(S1)Br)Br
-6.3035975	-1.2083901	3.5089035	5.095207	1.5863037	CC1=C(C=C(C(=C1Cl)Br)Cl)Br	CN1C=C(N=C1Br)Br
-5.9372115	-1.1872317	3.275202	4.74998	1.4747779	CC1=C(C(=CC(=C1Cl)Br)Br)N	C1=C(C(=NC(=C1Br)Cl)N)Br
-5.6049104	-1.8304744	2.542047	3.774436	1.232389	C1=CC2=C(C=C1Br)N=C(S2)Br	C1=C(C=C(N2C1=CN=C2)Br)Br
-6.3592105	-1.0109217	3.7148454	5.3482885	1.6334431	CC1=CC(=C(C(=C1)Br)Cl)Br	CC1=C(C=C(C=C1Br)OC)Br
-6.408462	-2.0876482	3.1111534	4.320814	1.2096608	C1=C(N=CC2=C(NN=C21)Br)Br	C1=C(C=C(C(=C1Br)Cl)Cl)Br
-6.6620803	-2.283512	2.9720056	4.378568	1.4065626	C1COC2=CC(=CC(=C2C1=O)Br)Br	BrC#CBr
-6.08814	-3.2214446	2.5050445	2.8666954	0.36165094	CC1=C(C=C(C=C1[N+](=O)[O-])Br)Br	FC1=C(C2=CC(C)=C(Br)S2)C2=NSN=C2C(C2=CC(C)=C(Br)S2)=C1F
-5.7847347	-2.3060102	2.583655	3.4787245	0.89506936	C1=CC(=C(C=C1Br)NN)Br	BrC%90=C(F)C%91=C(C(SC(Br)=C%92F)=C%92S%91)S%90
-6.5226874	-1.645781	3.317901	4.8769064	1.5590055	COC1=C(C=C(C=C1C#N)Br)Br	C1=CC(=C(C=C1Br)Br)C(=O)N
-5.746422	-1.6636841	2.6019075	4.082738	1.4808304	C1=C(C=C(C(=C1Br)N)F)Br	C1=C(C=C(C=C1Br)Br)C(=S)N
-5.824558	-1.0525063	3.3412142	4.7720513	1.4308372	COC1=CC(=C(C(=C1N)Br)Cl)Br	CC1=C(C=C(C=C1N)Br)Br
-6.728528	-2.8294616	2.9094138	3.8990664	0.98965263	C1=CC2=C(C3=C1C=CC(=N3)Br)N=C(C=C2)Br	BrC1=C(C#N)SC(Br)=C1C#N
-6.581388	-3.0002809	2.3648238	3.5811071	1.2162833	CN1C=C(N=C(C1=O)Br)Br	COC1=C(N=C(C(=C1)[N+](=O)[O-])Br)Br
-6.03671	-2.4403782	2.2964706	3.5963316	1.299861	C1=CC=C(C=C1)C(=S)NC2=C(C=CC(=C2)Br)Br	C1=CC(=NC=C1Br)Br
-6.9992037	-1.751444	3.7105336	5.24776	1.5372262	CC1=C(C=C(C(=C1Cl)Br)Cl)Br	O=C(O)c1cc(Br)cc(Br)c1
-5.404462	-0.9928132	2.9180832	4.4116488	1.4935656	COC1=CC(=CC(=C1N)Br)Br	C1=CC2=NC=C(N2C=C1Br)Br
-6.171992	-1.7924834	3.2242062	4.3795085	1.1553023	COC1=C(C=C(C=C1Br)C(=NO)N)Br	C1=CC2=C(C=CN=C2C=C1Br)Br
-6.1649895	-2.2783713	1.5894945	3.8866181	2.2971237	C1=CN2C(=N1)C(=CC(=N2)Br)Br	CS(=NC1=C(C=C(C=C1[N+](=O)[O-])Br)Br)(=O)C
-5.9870358	-1.4504629	3.284295	4.536573	1.2522779	C1=C(C(=C(C(=C1F)Br)F)Br)N	BrC(C=C1)=CC2=C1C(C1=CC=CC=C1C(OC)=O)C(C=CC(Br)=C1)=C1O2
-5.853589	-1.6788677	2.9969904	4.1747212	1.1777308	C1=C(C=C(C(=C1Br)N)F)Br	C1=CC2=C(C=CN=C2C(=C1)Br)Br
-5.84511	-1.9029876	2.5460467	3.9421225	1.3960757	C1=CC=C2C(=C1)C(=C3C=CC=CC3=C2Br)Br	CC1=CC(=C(C(=C1)Br)[N+]#[C-])Br
-5.994233	-2.5486782	2.2179813	3.445555	1.2275736	C1=C(C(=C(C(=C1Br)F)C#N)N)Br	CN%66C(C%67=CC%68=C(Br)SC(Br)=C%68C=C%67C%66=O)=O
-5.4437656	-2.5879931	1.8923739	2.8557725	0.9633986	FC%71=NC%72C(Br)=CC=C(Br)C%72N=C%71F	Brc1sc(Br)cc1
-6.9781446	-3.0604987	2.505791	3.917646	1.411855	CC(=O)C1=NC(=CN=C1Br)Br	C1=C(N=C(C(=N1)Cl)Br)Br
-6.842533	-2.6185513	2.985577	4.223982	1.2384048	C1=C(C(=NC=C1Br)Br)[N+](=O)[O-]	Cc1ccc(Br)c(Br)c1
-6.2473392	-1.8595579	2.9699495	4.387781	1.4178317	C1=C(C=C(N=C1Br)Br)N	C1=CC2=NC(=NN2C(=C1)Br)Br
-6.0712914	-1.3931015	3.1106021	4.67819	1.5675881	C1=C(C=C2C=NNC2=C1Br)Br	CN1C(=NC(=N1)Br)Br
-6.604731	-2.4882154	2.8639398	4.1165156	1.2525759	C1=CC(=NC(=C1C=O)Br)Br	BrC1=CC=C2C3=CC=C(Br)C=C3OC2=C1
-7.1546006	-2.7016559	3.1277633	4.4529448	1.3251815	C1(=C(NN=C1Br)Br)[N+](=O)[O-]	Brc1ccc(cc1)C(=O)c2ccc(Br)cc2
-7.0558243	-3.056553	2.5467877	3.9992714	1.4524837	C1=C(C(=C(N=C1Br)Br)[N+](=O)[O-])N	C1=C(C(=CN=C1Br)Br)C=O
-5.6901045	-1.230316	3.1323338	4.4597883	1.3274546	COC1=C(C=C(C=C1)Br)Br	Brc1sc(Br)cc1
-6.387468	-2.644018	2.2734652	3.74345	1.4699848	C1=C(C=C(C(=C1Br)F)C=O)Br	O=C1N(C)C2=CC(Br)=CC=C2/C1=C/C=C1C2=CC=C(Br)C=C2N(C)C/1=O
-5.4153976	-1.0097055	2.924348	4.405692	1.481344	C1=CC2=NC=C(N2C=C1Br)Br	C1CCN(CC1)C2=CC(=CC(=C2)Br)Br
-6.796033	-2.7782881	2.6878564	4.017745	1.3298886	C1=C(C2=NON=C2C(=C1)Br)Br	C1=CC(=NC(=C1Br)Cl)Br
-6.076712	-1.8832439	3.090801	4.193468	1.1026671	Cc3ccc(c2ccc1cc(Br)cc(Br)c1n2)cc3	C1=C(C=C2C(=C1Br)C=NN2)Br
-6.484469	-2.8317685	2.2602143	3.6527004	1.3924861	C1=C(N=C(C(=N1)Br)N)Br	BrC%93=NN=C(Br)C=N%93
-5.8330665	-1.8423134	2.826572	3.9907532	1.1641812	CC(=O)NC1=CC(=CC(=C1)Br)Br	CC(C)(C)c1cc2ccc3c(Br)cc(Br)c4ccc(c1)c2c34
-6.4283695	-2.3888848	2.5872622	4.039485	1.4522228	O=n1cc(Br)ccc1Br	Brc1ccc(cc1)C(=O)c2ccc(Br)cc2
-5.986446	-1.2184473	3.3171525	4.7679987	1.4508462	COc1c(Br)cc(Cl)cc1Br	C1=CC(=C(C=C1Br)NN)Br
-5.7812967	-1.9841571	2.774455	3.7971396	1.0226846	C1=CC2=C(N=C(C=C2C=C1Br)N)Br	C1=CC2=C(C=CC(=C2N=C1)Br)Br
-5.8046355	-1.7456893	2.978411	4.058946	1.0805352	C1=CC(=C2C(=C1Br)N=C(S2)Cl)Br	C1=C2C(=CN=C1Br)C(=CN2)Br
-6.3671036	-1.731008	3.4046857	4.6360955	1.2314098	[C-]#[N+]c1ccc(Br)cc1Br	BrC1=CC=C2C3=CC=C(Br)C=C3OC2=C1
-6.390597	-2.0031455	3.0468323	4.387451	1.3406188	C1=C(N=CC2=C(NN=C21)Br)Br	CC1=CC(=C(C(=C1)Br)F)Br
-6.545386	-1.3215077	3.6349802	5.223878	1.5888977	C1=CC(=C(C=C1Br)F)Br	C1=CC(=C(C=C1Br)CC#N)Br
-5.921513	-1.1870158	3.2960668	4.734497	1.4384303	CC1=CC(=C(C(=C1N)Br)F)Br	C1CC(=O)NC2=C(C=C(C=C21)Br)Br
-5.8383446	-2.0297258	2.6237333	3.8086188	1.1848855	COC1=C(C(=CC(=N1)Br)Br)N	CC(=O)C1=C(SC(=C1)Br)Br
-6.8217063	-2.671445	2.8479128	4.1502614	1.3023486	C1=CC(=NC(=C1F)Br)Br	O=C%51C%52=C(Br)SC(Br)=C%52C(C%51)=O
-6.125582	-1.3284231	3.3430593	4.797159	1.4540999	C1=CC=C2C(=C1)C(=CC=C2Br)Br	CC(C)C1=C(C=CC(=C1)Br)Br
-6.8156757	-1.7588917	3.5515616	5.056784	1.5052226	C1=C(C=C(C=C1Br)Br)OC(F)F	C1=C(C=C(C(=C1Br)F)C#N)Br
-5.961149	-1.2411377	3.1902375	4.7200117	1.5297742	C1=CC(=C(C(=C1Br)N)N)Br	C1=C(C=C(C(=C1Br)F)Br)Cl
-6.2170253	-2.0279918	2.9746282	4.1890335	1.2144053	C1(=C(N=C(C(=N1)Cl)Br)Br)N	CC1(C2=CC(=CC(=C2NC1=O)Br)Br)C
-6.4274697	-1.3735756	3.5494885	5.053894	1.5044055	C1=C(C(=CC(=C1Br)Cl)Br)Cl	COC1=CC(=C(C=C1Br)Br)F
-6.9747963	-2.492986	2.8920443	4.4818106	1.5897663	C1=C(C=NN=C1Br)Br	CC1=C(C=CC(=C1[N+](=O)[O-])Br)Br
-7.0661144	-3.0880158	2.7843597	3.9780986	1.1937389	C1(=C(SC(=C1[N+](=O)[O-])Br)Br)[N+](=O)[O-]	BrC1=NC2=CC=C(Br)C=C2O1
-6.61518	-2.6844254	2.7523715	3.9307547	1.1783831	C1=C(C(=CN=C1Br)Br)C=O	BrC#CC#CBr
-6.121634	-1.8839684	3.0531101	4.2376657	1.1845555	C1=C(C=NC(=C1Br)C#N)Br	C1=C2C(=CN=C1Br)C(=CN2)Br
-6.2420974	-3.1163235	2.175022	3.125774	0.950752	CC1=CN2C(=CN=C2C(=C1)Br)Br	O=C(N1)C2=C3C(C4=C(Br)C=C3C1=O)=C(C1=C3C(C5=CC=C34)=C(C(NC5=O)=O)C=C1Br)C=C2
-6.6607094	-1.8390489	3.2191796	4.8216605	1.6024809	COC1=C(C=C(C=C1Br)F)Br	BrC1=NOC(Br)=C1
-6.3665757	-2.4354753	2.3905754	3.9311004	1.540525	CC1=CC(=C(C(=C1N)Br)[N+](=O)[O-])Br	C1=C(C(=CC(=C1Br)F)Br)[N+](=O)[O-]
-6.213107	-2.2806504	2.735806	3.9324567	1.1966507	COC1=NC=C(C2=NNC(=C21)Br)Br	C1=CC(=C(C(=C1)Br)C2=C(N=C3C(=C2)C=NC(=N3)N)N)Br
-5.811742	-0.89816356	3.3508954	4.913578	1.5626826	C1=CC(=C(C=C1Br)Br)CC#N	C1=CC(=C(C=C1Br)Br)N
-6.137554	-1.7776611	3.2365642	4.359893	1.1233287	C1C2=C(C=CC(=C2)Br)C3=C1C=C(C=C3)Br	C1=CC=C(C=C1)C(=O)NC2=C(C=CC(=C2)Br)Br
-6.5673747	-1.7196143	3.4475014	4.84776	1.4002588	COC(=O)C1=C(C=C(C=C1)Br)Br	CC1=C(C=C(C=C1Br)OC)Br
-5.6946497	-3.1512327	1.609129	2.543417	0.934288	O=C1N(C)C2=CC(Br)=CC=C2/C1=C/C=C1C2=CC=C(Br)C=C2N(C)C/1=O	O=C(C1=C(F)C2=C(Br)SC(Br)=C2S1)OC
-6.8115478	-2.9927564	2.7335026	3.8187914	1.0852888	C1=C(C(=CN=C1Br)Br)[N+](=O)[O-]	Br/C=C/Br
-5.955674	-2.1540523	2.8902462	3.801622	0.91137576	C1C2=C(C=CC(=C2)Br)C3=C1C=C(C=C3)Br	COC%41=CC=CC(C%42=NC(C(Br)=CC=C%43Br)=C%43N=C%42C%44=CC(OC)=CC=C%44)=C%41
-6.5262046	-2.805671	2.5404704	3.7205336	1.1800632	C1=CC2=CC(=CC3=C2C4=C(C=C3)C=C(C=C41)Br)Br	C1=C(C=NC(=C1Br)[N+](=O)[O-])Br
-5.862431	-1.7396051	2.8282962	4.122826	1.2945299	CC1=CC(=C(C=C1Br)Br)OC	CC1=C(SC(=N1)Br)Br
-6.7563896	-2.5028887	3.1350393	4.253501	1.1184616	CC1=CC(=C(C(=C1[N+](=O)[O-])Br)I)Br	C1=C(C=C2C(=C1Br)N=C(S2)Cl)Br
-6.1349444	-1.0903479	3.4668329	5.0445967	1.5777638	C1=CC=C(C=C1)COC2=C(C=C(C=N2)Br)Br	Oc1ccc(Br)cc1Br
-6.519047	-2.3632355	2.7813053	4.1558113	1.374506	COC1=C(C=C(C=C1Br)C=O)Br	CC1=CC(=NN=C1Br)Br
-6.498225	-2.4148626	2.8500204	4.0833626	1.2333422	C1=C(N=C(N=C1Br)N)Br	C1=C(N=C(N=C1Br)N)Br
-5.829733	-2.3635082	2.312621	3.4662247	1.1536036	CC1=CC(=C(C=C1Br)Br)OC	BrC%23=C%24C(N=C(C%25=N%24)C%26=CC=CC%27=CC=CC%25=C%27%26)=C(Br)S%23
-5.5119095	-1.2062179	2.9662797	4.3056917	1.339412	COC1=C(C=C(C(=C1)N)Br)Br	CC1=CC(=NC(=C1N)Br)Br
-7.088153	-1.6217672	3.8026128	5.466386	1.6637731	C1(=C(C(=C(C(=C1F)Br)F)Br)F)F	FC(F)Oc1cc(Br)c(Cl)c(Br)c1
-6.8777475	-3.5956073	2.4670696	3.2821403	0.8150706	C1=C(C2=NSN=C2C(=N1)Br)Br	C1=CN=C(C(=C1Br)C=O)Br
-6.420848	-2.0251129	3.0678523	4.395735	1.3278825	C1=C(C(=C(C(=C1Br)Cl)Br)N)Cl	COC1=C(C=C(C=C1Br)C=O)Br
-5.713972	-1.8189305	2.5279453	3.8950415	1.3670962	CN=[N+](C1=CC(=CC(=C1N)Br)Br)[O-]	CC1=CN2C(=CN=C2C(=C1)Br)Br
-5.925587	-1.4979639	2.8784404	4.4276233	1.5491829	CC1=CC(=NC(=C1N)Br)Br	C1=C(C2=NC=NN2C=C1Br)Br
-5.8753853	-1.7346773	2.824665	4.140708	1.3160429	C1=CC(=C2C(=C1Br)C=NN2)Br	Brc3ccc(N(c1ccccc1)c2ccc(Br)cc2)cc3
-5.4841385	-1.4854238	2.741036	3.9987147	1.2576787	CC1=C(C(=C(C=C1Br)Br)N)C	BrC(S6)=CC7=C6C(SC(Br)=C8)=C8S7
-5.6600657	-0.8336549	3.2490041	4.826411	1.5774066	CCC1=C(C=CC(=C1)Br)Br	C1CCN(CC1)C2=CC(=CC(=C2)Br)Br
-6.2671237	-2.1876607	2.8395367	4.079463	1.2399263	C1=C(N=CC2=NNC(=C21)Br)Br	CC1=NC(=CC(=C1)Br)Br
-6.429389	-1.3847835	3.562057	5.0446053	1.4825482	CCC1=CC(=CC(=C1Br)CC)Br	COC1=C(C(=C(C=C1Br)Br)F)F
-6.0098486	-1.478277	3.0517788	4.5315714	1.4797926	C1=C(C(=C(C(=C1Br)F)C#N)N)Br	C1=C(C=C2C(=C1Br)C=NN2)Br
-6.3220906	-1.661683	3.2942836	4.6604075	1.3661239	CC(=O)NC1=C(C=CC(=C1)Br)Br	COC1=C(C=C(C=C1Br)C(=NO)N)Br
-6.5168633	-2.3056192	2.7716737	4.211244	1.4395704	C1=C(C=C(C(=C1Br)C=O)Br)F	C1CC(=O)NC2=C(C=C(C=C21)Br)Br
-6.001666	-2.5883641	2.2146153	3.413302	1.1986866	C1=C(C(=C(N=C1C(F)(F)F)Br)N)Br	O=C1N(C)C(C2=CC=C(Br)C=C2)=C2C1=C(C1=CC=C(Br)C=C1)N(C)C2=O
-6.2019844	-1.456804	3.3357599	4.74518	1.4094203	CC1=CC(=C(C=C1Br)Br)OC	C1=C(C(=CN=C1Br)Br)F
-6.1671624	-2.3255694	2.6045413	3.841593	1.2370517	CC1=CC(=C(C=C1Br)[N+](=O)[O-])Br	CN1C=C(N=C1Br)Br
-6.100954	-2.3046684	2.3209128	3.7962856	1.4753728	C1=C(C=C(C=C1Br)Br)C(=S)N	C1(=C(C(=C(C(=C1F)F)Br)F)F)C2=C(C(=C(C(=C2F)F)Br)F)F
-7.0139933	-2.479645	3.214646	4.5343485	1.3197024	C1=C(C=C(C=C1Br)Br)OC(F)(F)F	CC1=C(C=C(C=C1[N+](=O)[O-])Br)Br
-6.8666797	-1.9515064	3.2639647	4.9151735	1.6512089	C1=CC(=C(C(=C1Cl)Br)Cl)Br	CC1=NC(=NC=C1Br)Br
-6.2737665	-2.9852118	1.7707789	3.2885547	1.5177758	N#CC(C#N)C3c1cc(Br)ccc1c2ccc(Br)cc23	C1=C(C=C2C(=C1Br)NC(=O)C2=O)Br
-6.206273	-1.7662404	3.076527	4.440033	1.3635058	C1=CC(=C(C=C1Br)C#N)Br	C1=CN=C(C(=C1Br)N)Br
-6.551099	-2.2127564	3.1351185	4.3383427	1.2032242	FC(F)Oc1cc(Br)c(Cl)c(Br)c1	C1=CC2=C(C=C1Br)SC(=N2)Br
-5.4734545	-1.8205177	2.524179	3.652937	1.128758	CC1=CC(=CC(=C1)Br)Br	C1=C(SC2=C1SC3=C2SC(=C3)Br)Br
-6.933831	-3.2105856	2.5989413	3.7232456	1.1243043	C1=C(C(=CC(=C1Br)C(=O)Cl)Br)C(=O)Cl	C1=C(SC(=C1C=O)Br)Br
-6.6137567	-2.3468444	2.8526883	4.2669125	1.4142241	C1=CC(=C(C=C1Br)Br)C=O	C1=C(N=C(N=C1Br)N)Br
-6.173953	-1.3616228	3.1992266	4.8123302	1.6131036	CC1=C(C=C(C(=N1)C)Br)Br	C1=CN=C(C(=C1Br)N)Br
-5.950314	-0.94311583	3.519211	5.0071983	1.4879873	CC1=CC(=C(C=C1Br)C)Br	C1COC2=C(C=C(C=C21)Br)Br
-6.2705255	-2.0550873	2.818882	4.215438	1.3965559	C1=C(C=NN=C1Br)Br	COC1=C(C=C(C2=C1N=CC=C2)Br)Br
-5.3149295	-2.7186651	1.5543153	2.5962644	1.041949	BrC1=C2OC(C)C(C)OC2=C(Br)S1	O=C(C1=C(F)C2=C(Br)SC(Br)=C2S1)OC
-6.4527454	-1.6405731	3.3530023	4.8121724	1.4591701	C1=C(C(=CN=C1Br)F)Br	C1=CC2=C(C=C1Br)C(=CO2)Br
-5.949898	-1.972621	2.8110855	3.9772768	1.1661913	C1=CC2=C(C=CC3=C2C4=C1C=CC(=C4C=C3)Br)Br	C1=C(C=C(C(=C1Br)Cl)Br)Cl
-5.7561746	-1.5751076	2.6865435	4.181067	1.4945235	CC(=S)NC1=C(C=CC(=C1)Br)Br	C1=C2C(=CNC2=NC=C1Br)Br
-6.930541	-2.5578184	2.8953254	4.3727226	1.4773972	C1=CC(=C(C=C1Br)C=O)Br	C1=C(C=C(C=C1Br)Br)[N+](=O)[O-]
-6.2803655	-1.7002143	3.1870656	4.580151	1.3930855	C1=C(C(=CC(=C1Br)F)Br)F	Brc3ccc(N(c1ccccc1)c2ccc(Br)cc2)cc3
-6.385144	-2.2438812	2.9792309	4.141263	1.1620321	C1=C(C(=NC=C1Br)Br)Cl	C1=CC=C2C(=C1)C=C(N=C2Br)Br
-6.1030655	-2.3562121	2.3882182	3.7468534	1.3586352	C1=C2C(=C(C(=C1Br)N)Br)OC(O2)(F)F	BrC%28=NC%29=C(N=C(Br)S%29)S%28
-6.088627	-2.0780928	2.7778285	4.0105343	1.2327058	C1=CN=C(C=C1Br)Br	BrC1=C2OC(C)C(C)OC2=C(Br)S1
-5.9958563	-2.2117813	2.3897977	3.784075	1.3942773	CC1=C(C(=CC(=C1[N+](=O)[O-])Br)Br)N	CC1=C(C=C2C(=CNC2=N1)Br)Br
-6.8277893	-2.7901065	3.0264273	4.0376825	1.0112553	C1=C(C=C(C(=C1Br)F)C=O)Br	BrC(C=N1)=CC2=C1C(N=CC(Br)=C1)=C1C1=NSN=C21
-6.5038714	-2.004021	3.20712	4.4998503	1.2927303	C1=C(N=C(N=C1Br)N)Br	Fc1cc(Br)c(Br)cc1F
-5.7151313	-1.2175651	2.9753833	4.497566	1.522183	CC1=C(C=C(C=C1Br)OC)Br	CC1=CN2C(=CN=C2C(=C1)Br)Br
-6.3679333	-1.907508	2.9411707	4.4604254	1.5192547	C1=CC2=C(C(=C1)Br)OC3=C2C=CC=C3Br	CC1=CC(=NN=C1Br)Br
-6.628968	-2.6906545	3.172578	3.9383132	0.76573515	CCC1=CC(=CC(=C1)Br)Br	BrC(C=N1)=CC2=C1C(N=CC(Br)=C1)=C1C1=NSN=C21
-5.825257	-1.2636933	3.450589	4.5615635	1.1109746	C1=C(C2=C(S1)C(=CS2)Br)Br	Cc1ccc(Br)c(Br)c1
-6.070444	-2.6828566	2.2411776	3.3875875	1.14641	C1=C(C(=NC=C1Br)Br)C(F)(F)F	CN%66C(C%67=CC%68=C(Br)SC(Br)=C%68C=C%67C%66=O)=O
-6.2466245	-2.2926176	2.5533466	3.954007	1.4006603	CCC1=C(C=C(C=N1)Br)Br	O=C(C1=C(F)C2=C(Br)SC(Br)=C2S1)OC
-6.215607	-1.7802478	2.9446282	4.4353595	1.4907312	C1=C(C=C(C(=C1Br)N)Br)S(=O)(=O)N	C1=CC(=NC(=C1Br)Cl)Br
-6.6840878	-1.8030756	3.5054212	4.881012	1.3755908	COC1=C(C=CC=C1Br)Br	C1(=C(C(=C(C(=C1F)F)Br)F)F)C2=C(C(=C(C(=C2F)F)Br)F)F
-6.2573028	-1.4876773	3.153146	4.7696257	1.6164796	CC1=CC(=CC(=C1Cl)Br)Br	C1=CN=C(C(=C1Br)N)Br
-5.2940617	-1.7837174	2.2780836	3.5103443	1.2322607	CC1=CN2C(=CN=C2C(=C1)Br)Br	BrC%96=CC(C%97(SCCS%97)C%98=C%99SC(Br)=C%98)=C%99S%96
-6.9385977	-1.8459961	3.5809417	5.092602	1.5116601	C1=CC(=C(C(=C1)Br)CC#N)Br	C1=CC(=NC(=C1Br)Cl)Br
-6.0838494	-1.0734755	3.4100316	5.010374	1.6003425	C1=CC(=C(C=C1Br)F)Br	CC1=C(C(=NC=C1Br)N)Br
-5.8196807	-1.1208991	3.3030481	4.6987815	1.3957334	C1COC2=C(C=C(C=C21)Br)Br	Brc1ccc(cc1)c2ccc(Br)cc2
-5.575289	-1.2010405	2.8542337	4.3742485	1.5200148	CC1=C(C=CC(=C1F)Br)Br	BrC%83=CC(SC%84=CC(Br)=CC%85=C%84N%86C=C%85)=C%86C=C%83
-6.430565	-2.3393393	3.0845108	4.0912256	1.0067148	C1=CN=CC2=C1C(=CC(=N2)Br)Br	C1=CC2=C(C=C1Br)SC3=C2C=CC(=C3)Br
-5.7552953	-2.8567386	2.3181195	2.8985567	0.5804372	C1=CC2=NNC(=C2C=C1Br)Br	C1=C(C2=NSN=C2C(=C1)Br)Br
-5.685886	-2.1518657	2.270338	3.5340202	1.2636821	CC(=S)NC1=C(C=CC(=C1)Br)Br	BrC%34=CC%35=C(Br)SC=C%35S%34
-6.005579	-2.0170805	2.92635	3.9884984	1.0621483	C1=CC2=C(C=C1Br)N=C(S2)Br	C1=CC2=C(C=CC(=C2)Br)C=C1Br
-6.549011	-2.628928	2.6399944	3.9200833	1.2800889	CC1=CC(=C(C(=C1[N+](=O)[O-])Br)I)Br	CC(=O)C1=C(SC(=C1)Br)Br
-6.188699	-2.713778	2.2465525	3.4749207	1.2283683	C1COC2=C(SC(=C2O1)Br)Br	BrC%93=NN=C(Br)C=N%93
-6.9470963	-2.7628329	2.757594	4.184263	1.4266691	C1=C(C(=C(C(=C1F)Br)[N+](=O)[O-])Br)F	C1=C(C(=C(C(=N1)Cl)Br)N)Br
-6.879799	-1.663786	3.6906147	5.216013	1.5253983	CC1=C(C=CN=C1Br)Br	C1=C(C=C(C(=C1F)Br)F)Br
-6.843705	-2.220918	3.0301528	4.6227875	1.5926347	C1COC2=CC(=CC(=C2C1=O)Br)Br	O=C(O)c1cc(Br)cc(Br)c1
-6.040485	-1.1930792	3.2642658	4.8474054	1.5831397	C1=C(C=C(C(=C1Br)F)F)Br	CC1=CC(=C(C(=C1)Br)N)Br
-5.8857584	-1.0591402	3.3558555	4.826618	1.4707627	C1COC2=C(C=C(C=C21)Br)Br	C1CCOC(C1)COC2=C(C=C(C=C2)Br)Br
-6.26363	-1.4508432	3.249012	4.8127866	1.5637746	CC1=C(C=C(C=N1)Br)Br	C1=C(C=C(N=C1N)Br)Br
-6.1080265	-1.6036563	3.201464	4.50437	1.3029063	COC1=C(C=C(C=C1)Br)Br	CC(=O)C1=CC(=CC(=C1)Br)Br
-6.156638	-1.9419489	2.8001475	4.2146893	1.4145417	C1=C(C(=C(C(=N1)Br)N)N)Br	CC1=NC(=NC=C1Br)Br
-6.795614	-1.9783788	3.5350885	4.817235	1.2821465	C1=CN=C(C=C1Br)C2=NC=CC(=C2)Br	N#CCS(=O)(C1=CC(Br)=CC=C1Br)=O
-6.6343365	-1.6958156	3.6223378	4.938521	1.3161831	CC(C)C1=C(C=CC(=C1)Br)Br	C1=C(C(=NC=C1Br)Br)Cl
-6.36545	-2.1200423	3.1438782	4.2454076	1.1015294	C1=CC(=C(C=C1Br)N=C=S)Br	C1=CC(=CC2=C1C=CC(=N2)Br)Br
-6.6866984	-2.0659282	2.9546893	4.6207705	1.6660812	C1=CC(=C(C=C1Br)C=O)Br	O=S(OC)(C1=CC(Br)=CC=C1C1=CC=C(Br)C=C1S(OC)(=O)=O)=O
-6.8148108	-1.3111032	3.8483758	5.5037074	1.6553316	CC1=CC(=C(C=C1Br)Cl)Br	FC(F)Oc1cc(Br)c(Cl)c(Br)c1
-6.728946	-1.3696909	3.7166228	5.3592553	1.6426325	CC1=C(C=C(C=C1F)Br)Br	CC1=NC(=C(C=C1Br)Br)F
-6.369289	-2.7967901	2.5568383	3.5724988	1.0156605	C1=C(C(=CC(=C1Br)C(=O)Cl)Br)C(=O)Cl	CC1=CN2C(=CN=C2C(=C1)Br)Br
-6.1396565	-1.9327389	2.685875	4.206918	1.5210428	C1=C(C=NN=C1Br)Br	C1=CC(=C(C(=C1Br)N)N)Br
-6.080966	-1.4315114	3.324922	4.6494546	1.3245325	C1(=C(C(=C(C(=C1Br)F)F)Br)F)F	CC1=C(C=CC(=C1Br)N)Br
-5.5236006	-1.6629138	2.4159412	3.8606868	1.4447455	CN1C=C(C=C(C1=O)Br)Br	BrC1=C2C(OCCO2)=C(Br)S1
-6.2078295	-1.7608098	3.2167983	4.4470196	1.2302213	C1=C(C(=C(C(=N1)N)Br)C(F)(F)F)Br	Brc1cncc(Br)c1
-5.968119	-1.5508106	3.0564864	4.417309	1.3608224	C1=CC(=C2C(=C1Br)C=NN2)Br	C1=C(C(=NC(=C1Br)Cl)N)Br
-6.470847	-2.3159347	2.8741984	4.1549125	1.280714	CC(C)(C)C1=CC(=C(C(=C1)Br)Cl)Br	CC1=NC2=C(N=C1C)C(Br)=CC=C2Br
-6.4878054	-2.3587031	2.8455074	4.129102	1.2835948	C1=C(C(=CC(=C1Br)[N+](=O)[O-])Br)N	C1=C(C=NC(=C1Br)F)Br
-6.1903863	-2.766893	2.4120646	3.4234934	1.0114288	O=CC%73=CC(S%74)=C(S%73)C%75=C%74C(Br)=C(C(SC(C=O)=C%76)=C%76S%77)C%77=C%75Br	Brc1ccc(cc1)C(=O)c2ccc(Br)cc2
-6.0756946	-2.501948	2.24542	3.5737464	1.3283265	CCC1=C(C=C(C=N1)Br)Br	O=C1N(C)C(C2=CC=C(Br)C=C2)=C2C1=C(C1=CC=C(Br)C=C1)N(C)C2=O
-5.80841	-1.6059259	2.6576734	4.202484	1.5448108	CC1=NC(=C(C(=C1)Br)N)Br	Brc1sc(Br)cc1
-6.505373	-2.000718	3.3691087	4.504655	1.1355462	C1=CC2=C(C=C1Br)S(=O)(=O)C3=C2C=CC(=C3)Br	CC1=NC(=CC(=C1)Br)Br
-6.0050693	-2.0371957	2.4626677	3.9678736	1.5052059	CN1C(=NC(=N1)Br)Br	BrC%61=C%62C(F)=CSC%62=C(Br)S%61
-7.136482	-3.1155562	2.6524858	4.0209255	1.3684397	COC(=O)C1=C(C=C(C=C1)Br)Br	O=C%57C%58=C(Br)SC(Br)=C%58C(C%57(F)F)=O
-5.8512464	-1.5066247	2.9019396	4.3446217	1.442682	CN(CC1=CC(=CC(=C1N)Br)Br)C2CCCCC2	C1=C(C(=NN=C1Br)N)Br
-6.7516985	-1.9466137	3.4451406	4.8050847	1.3599441	C1=CN=C(C=C1Br)C2=NC=CC(=C2)Br	Brc1cncc(Br)c1
-5.8405404	-2.1334317	2.3879354	3.7071087	1.3191733	C1=CC(=C2C(=C1Br)C=NN2)Br	CN1C=C(N=C(C1=O)Br)Br
-5.9159594	-2.6363857	2.24396	3.2795737	1.0356138	C1=C(C=C(C=C1Br)Br)F	BrC%23=C%24C(N=C(C%25=N%24)C%26=CC=CC%27=CC=CC%25=C%27%26)=C(Br)S%23
-6.14405	-2.0893383	2.6871173	4.054712	1.3675945	C1=C(C(=CC(=C1Br)F)Br)F	CC(C)(C)N=[N+](C1=CC(=CC(=C1N)Br)Br)[O-]
-6.0478024	-3.2008245	2.0758848	2.846978	0.77109313	C1=C(C=C(C=C1Br)Br)C(F)F	C1=CC2=C(C3=NSN=C3C(=C2C=C1)Br)Br
-5.52421	-1.0351654	3.1335216	4.4890447	1.3555231	CC1=C(C(=CC(=C1F)Br)Br)N	C1=C2C(=CN=C1Br)C(=CN2)Br
-6.089733	-2.2700305	2.623393	3.8197026	1.1963096	COC1=C(C=C(C=C1Br)C=O)Br	BrC1=C2OC(C)C(C)OC2=C(Br)S1
-6.1186047	-2.295651	2.343741	3.8229537	1.4792128	CC1=CC(=C(C(=C1N)Br)[N+](=O)[O-])Br	C1=C(C=C(C=C1Br)Br)N
-7.2955513	-2.6313932	3.2326312	4.664158	1.4315267	C1(=C(C(=C(C(=C1F)Br)F)Br)F)F	CC1=C(C=C(C=C1[N+](=O)[O-])Br)Br
-6.0877733	-1.6065601	2.9128475	4.481213	1.5683656	C1=CC(=C(C(=C1F)Br)F)Br	C1=C(SC2=C1SC(=C2)Br)Br
-5.7815714	-1.5627618	2.9058375	4.2188096	1.3129721	C1COC2=C(C=C(C=C21)Br)Br	Br/C=C/Br
-6.541716	-1.6847434	3.414786	4.8569727	1.4421866	CCOC1=C(C=C(C=C1Br)F)Br	O=S(OC)(C1=CC(Br)=CC=C1C1=CC=C(Br)C=C1S(OC)(=O)=O)=O
-5.874823	-1.993759	2.545124	3.881064	1.3359399	C1=CC2=C(C=CC3=C2C4=C1C=CC(=C4C=C3)Br)Br	C1=CC(=[N+](C(=C1)Br)[O-])Br
-6.6666174	-2.2432344	3.0823078	4.4233828	1.341075	C1=C(N2C=C(N=C(C2=N1)Br)Br)Cl	CC1=NC(=C(C=C1Br)Br)Cl
-5.7434664	-2.3704762	2.411417	3.3729901	0.9615731	C1=C(C=NC(=N1)Br)Br	BrC(S6)=CC7=C6C(SC(Br)=C8)=C8S7
-6.0749106	-2.143276	2.6106634	3.9316347	1.3209713	C1=C(C=C(C(=C1Br)Cl)Cl)Br	BrC%96=CC(C%97(SCCS%97)C%98=C%99SC(Br)=C%98)=C%99S%96
-6.943518	-2.8428442	2.9624615	4.1006737	1.1382122	C1=C(C=NC(=N1)Br)Br	C1=C2C=C(C=NC2=C(C=C1[N+](=O)[O-])Br)Br
-6.376709	-1.6399043	3.295118	4.736805	1.4416869	CC1=C(C=C(C=N1)Br)Br	C1=C(C(=C(C(=N1)N)Br)C(F)(F)F)Br
-6.115449	-1.9299002	3.0874834	4.185549	1.0980654	C1=CC2=C(C=CC(=C2N=C1)Br)Br	BrC(C=C1)=CC2=C1C(C1=CC=CC=C1C(OC)=O)C(C=CC(Br)=C1)=C1O2
-6.540217	-1.3902322	3.5593052	5.149985	1.5906796	CCOC1=C(C=C(C=C1Br)F)Br	CC1=C(C(=NC=C1Br)C)Br
-5.8778844	-2.206579	2.42779	3.6713054	1.2435155	CN=[N+](C1=CC(=CC(=C1N)Br)Br)[O-]	BrC%69=C(OC)C(OC)=C(Br)S%69
-6.074844	-1.6457118	3.2389789	4.429132	1.1901531	CC1=C(C=C(C=C1Br)S(=O)(=O)C(F)(F)F)Br	CC1=C(N=C(N1C)Br)Br
-6.5447907	-2.069051	3.2342534	4.4757395	1.2414861	C1=C(C=C(C(=C1Br)F)Br)F	C1=CC2=CC(=CN=C2C3=NC=C(C=C31)Br)Br
-5.8782654	-1.0918872	3.3222296	4.786378	1.4641483	CN(CC1=CC(=CC(=C1N)Br)Br)C2CCCCC2	C1=C(C(=C(C(=C1Br)F)Br)N)Cl
-6.4633846	-2.5001767	2.7661965	3.963208	1.1970115	C1=C(C(=CN=C1Br)C=O)Br	C1=C(C=C(N=C1N)Br)Br
-6.2025857	-2.2637057	2.6337326	3.93888	1.3051474	CC(C)(C)C1=CC(=C(C(=C1)Br)N)Br	C1=C(N=C(C(=N1)Cl)Br)Br
-6.268425	-2.4866033	2.53346	3.7818217	1.2483618	C1=C(C=C(C=C1Br)Br)OC(F)F	C1=C(SC(=C1C=O)Br)Br
-6.000394	-2.6333385	2.2587848	3.3670554	1.1082706	C1=CC(=NN=C1Br)Br	BrC%61=C%62C(F)=CSC%62=C(Br)S%61
-5.487747	-1.1392719	2.959266	4.3484755	1.3892095	C1=C(C(=CN=C1Br)N)Br	CC1=C(N=C(N1)Br)Br
-6.664657	-1.834227	3.4398603	4.83043	1.3905697	C1=CC2=NC(=NN2C=C1Br)Br	C1=C(C=C(C(=C1Cl)Br)F)Br
-6.502314	-1.6680157	3.2885256	4.834298	1.5457726	CC1=CC(=C(C(=C1)Br)[N+]#[C-])Br	C1=CC2=NC(=NN2C(=C1)Br)Br
-6.8406663	-3.0858002	2.6049392	3.7548661	1.1499269	C1=CC(=C2C(=C1Br)N=CC=N2)Br	COC1=C(N=C(C(=C1)[N+](=O)[O-])Br)Br
-7.006329	-2.7209191	2.705429	4.28541	1.5799809	C1=C(C=C(N=C1Br)Br)Cl	C1=C(C(=C(C=N1)Br)C=O)Br
-6.7039056	-2.225685	3.0567987	4.478221	1.4214222	C1=CC2=NC(=NC=C2C=C1Br)Br	CC1=C(C(=NC=C1Br)Cl)Br
-5.714178	-1.7868712	2.6888876	3.927307	1.2384193	C1=CC=C2C(=C1)C(=C3C=CC=CC3=C2Br)Br	COC1=CC(=C(C(=C1N)Br)Cl)Br
-6.6872563	-2.8507779	3.079465	3.8364785	0.75701356	C1=C(C2=NC=NN2C=C1Br)Br	BrC(C=N1)=CC2=C1C(N=CC(Br)=C1)=C1C1=NSN=C21
-5.881426	-2.4351463	2.2924087	3.4462795	1.1538708	COC1=NC=C(C2=NNC(=C21)Br)Br	BrC%69=C(OC)C(OC)=C(Br)S%69
-6.9148836	-2.7790117	2.777725	4.135872	1.3581469	C1=C(C=C(N=C1Br)Br)Cl	C1=C(C(=CN=C1Br)Br)C=O
-6.1270747	-1.467418	3.2743387	4.6596565	1.3853178	N#CC(C#N)C3c1cc(Br)ccc1c2ccc(Br)cc23	C1=C(C(=C(C(=C1Br)Cl)Br)N)F
-6.8236017	-2.2789888	3.1821852	4.544613	1.3624277	C1=CC(=NC(=C1F)Br)Br	Brc1ccc(cc1)C(=O)c2ccc(Br)cc2
-6.6800966	-2.4418094	2.85116	4.238287	1.3871269	C1=CN=C2C=C(C=NC2=C1Br)Br	CC1=CC(=C(C(=C1)Br)Cl)Br
-5.2739153	-1.2057099	2.7262955	4.0682054	1.3419099	C1=CSC(=C1Br)C2=C(C=CS2)Br	CC1=C(N=C(N1)Br)Br
-6.772811	-1.2023493	3.9370694	5.5704618	1.6333923	CC1=C(C=CC(=C1Cl)Br)Br	C1=CC(=C(C(=C1Br)Cl)Cl)Br
-5.995217	-1.2238154	3.3281846	4.7714014	1.4432168	CC1=CC(=C(C(=C1Cl)Br)N)Br	CC1=CC(=C(C=C1Br)Br)OC
-5.9769926	-1.3148843	3.1100395	4.6621084	1.552069	CN1C(=C(N=C1Br)F)Br	CCC1=CC(=CC(=C1)Br)Br
-5.7244534	-2.675374	2.218678	3.0490794	0.8304014	C1=C2C=C(SC2=CC3=C1SC(=C3)Br)Br	BrC%28=NC%29=C(N=C(Br)S%29)S%28
-6.580658	-1.305277	3.7095766	5.275381	1.5658045	C1=CC(=C(C=C1Br)Br)F	CCC1=CC(=CC(=C1Cl)Br)Br
-6.174933	-1.4697416	3.34902	4.7051916	1.3561716	CC1(C2=CC(=CC(=C2NC1=O)Br)Br)C	CC%45(OC)C%46=C(C=CC(Br)=C%46)C%47=C%45C=C(Br)C=C%47
-7.3397503	-2.9234347	3.0367503	4.4163156	1.3795652	C1=CC(=C(C=C1Br)C(F)(F)F)Br	C1=C(C(=CN=C1Br)[N+](=O)[O-])Br
-6.0911436	-1.217238	3.3533156	4.8739057	1.5205901	CC1=CC(=C(C=C1Br)Cl)Br	BrC4=CC5=C(SC(Br)=C5)S4
-6.7297297	-1.9414107	3.38491	4.788319	1.403409	C1=CC(=C(C=C1Br)Br)C(F)(F)F	C1=CC2=C(C=CN=C2C=C1Br)Br
-6.4280076	-1.2665582	3.6084008	5.1614494	1.5530486	COc1c(Br)cc(Cl)cc1Br	CC1=C(C(=NC=C1Br)C)Br
-6.4736376	-2.1723204	2.7951968	4.301317	1.5061204	CCC1=CC(=CC(=C1Br)CC)Br	BrC1=CC=C(Br)S1(=O)=O
-5.7427273	-1.8877429	2.761402	3.8549843	1.0935824	C1=CC2=CC(=CC3=C2C4=C(C=C3)C=C(C=C41)Br)Br	COC1=C(C=C(C2=C1N=CC=C2)Br)Br
-6.374484	-1.907428	2.907091	4.4670563	1.5599654	CC1=C(C=NC=C1Br)Br	C1=C(C(=C(N=C1C(F)(F)F)Br)N)Br
-6.1268005	-2.5330396	2.4499073	3.593761	1.1438537	C1=CC(=NC(=C1Br)N)Br	C12=C(SC(=C1C(=O)OC2=O)Br)Br
-5.749945	-1.7023904	2.8472567	4.047555	1.2002983	BrC(C=C1)=CC2=C1C(C1=CC=CC=C1C(OC)=O)C(C=CC(Br)=C1)=C1O2	BrC1=C2C(OCCO2)=C(Br)S1
-6.053691	-1.1861763	3.2497036	4.8675146	1.617811	C1=C(C(=CC(=C1F)Br)Br)N	CC1=NC(=C(C=C1Br)Br)F
-5.354328	-2.2591496	2.20124	3.0951786	0.89393854	CC1=C(SC(=N1)Br)Br	BrC(S%16)=CC%17=C%16C(SC(Br)=C%18)=C%18N%17C
-6.6184464	-1.6996796	3.5492625	4.918767	1.3695045	CC1=CC(=NC=C1Br)Br	C1=CN=C(C=C1Br)C2=NC=CC(=C2)Br
-6.0380006	-2.0183632	2.8631644	4.019637	1.1564727	N#CC(C#N)C3c1cc(Br)ccc1c2ccc(Br)cc23	BrC%87=C%88C(SC(Br)=C%88)=NC%89=C%87C(F)=C(F)S%89
-6.097632	-2.1497107	2.7538357	3.9479213	1.1940856	C1=CC2=CC(=C(N=C2N=C1)Br)Br	CC(C)(C)C1=CC(=C(C(=C1)Br)N)Br
-7.082756	-2.8134186	2.8483756	4.2693377	1.4209621	C1=CC=C2C(=C1)C(=NC(=N2)Br)Br	CN1C(=C(C(=N1)Br)[N+](=O)[O-])Br
-6.026455	-1.3829988	3.2580676	4.643456	1.3853884	C1C2=C(C=CC(=C2)Br)C3=C1C=C(C=C3)Br	C1=C(C=C(C=C1Br)Br)OC(F)F
-6.489494	-2.1781592	2.9153876	4.3113346	1.395947	C1=C(C=NC2=NNC(=C21)Br)Br	COC(=O)C1=C(C=C(C=C1)Br)Br
-5.585189	-1.5251929	2.655218	4.059996	1.4047782	CCC1=CC(=CC(=C1N)Br)Br	BrC%61=C%62C(F)=CSC%62=C(Br)S%61
-5.5980334	-1.3139384	2.8280246	4.284095	1.4560702	C1=CC(=NC(=C1N)Br)Br	C1=C(C=C2C(=C1Br)C(=NN2)N)Br
-6.22553	-1.9709741	2.9742887	4.254556	1.2802675	COC1=C(C=C(C=N1)Br)Br	BrC%87=C%88C(SC(Br)=C%88)=NC%89=C%87C(F)=C(F)S%89
-6.065107	-2.567232	2.4951775	3.497875	1.0026975	O=C(Br)C%78=CC(S%79)=C(S%78)C%80=C%79C=C(C(SC(C(Br)=O)=C%81)=C%81S%82)C%82=C%80	BrC(C=C1)=CC2=C1C(C1=CC=CC=C1C(OC)=O)C(C=CC(Br)=C1)=C1O2
-6.007926	-1.0975058	3.146116	4.9104204	1.7643044	C1=C(C=C(C(=C1Br)N)Br)F	CS(=O)(=O)C1=CC(=C(C(=C1)Br)N)Br
-5.8876543	-1.1387595	3.2379017	4.7488947	1.510993	C1=C(C(=CC(=C1Br)F)Br)F	CC(C)C1=CC(=CC(=C1N)Br)Br
-5.747708	-1.1744906	3.1916003	4.5732174	1.3816171	CC(C)(C)C(=O)NC1=CC(=CC(=C1)Br)Br	CN(CC1=CC(=CC(=C1N)Br)Br)C2CCCCC2
-5.754842	-1.6211989	2.9500606	4.133643	1.1835825	C1=CC2=C(C=C1Br)SC3=C2C=CC(=C3)Br	Oc1ccc2cc(Br)ccc2c1c3c(O)ccc4cc(Br)ccc34
-6.5085416	-2.3174577	2.8129573	4.191084	1.3781266	C1=C(C=C(C(=C1Br)Cl)C(F)(F)F)Br	C1=C(SC(=C1C=O)Br)Br
-6.8825345	-1.9227529	3.4424899	4.9597816	1.5172918	C1=C(C=C(N=C1Br)Br)Cl	C1=C(C=C(C=C1Br)Br)C(F)F
-6.070755	-2.269682	2.4458492	3.801073	1.3552239	CC1=C(C(=CC(=C1[N+](=O)[O-])Br)Br)N	CC%45(OC)C%46=C(C=CC(Br)=C%46)C%47=C%45C=C(Br)C=C%47
-6.194854	-3.2764864	2.5104146	2.9183674	0.4079528	CC1=C(C(=NC=C1Br)N)Br	C1=C(C2=NSN=C2C(=N1)Br)Br
-5.9505663	-1.1175804	3.2635689	4.832986	1.569417	CC1=C(C(=CC(=C1F)Br)Br)N	C1=C(C=C(C=C1Br)Br)OC(F)F
-6.1886163	-2.3034859	2.6474242	3.8851304	1.2377062	C1=C(C2=NNC(=C2C=N1)Br)Br	C1=CC2=C(C=C1Br)N=C(S2)Br
-7.192743	-2.7057996	2.8657024	4.4869432	1.6212409	C1=C(C=NC(=C1Br)C#N)Br	C1=CN=C(C(=C1Br)C=O)Br
-5.9108686	-2.1086345	2.6990252	3.8022342	1.103209	COC1=C(C=C(C=C1Br)C=O)Br	C1=C(C=C2C(=C1Br)C(=NN2)N)Br
-7.240601	-2.8760204	2.7649553	4.3645806	1.5996253	CN1C(=NC(=N1)Br)Br	C1=C(C=NC(=C1Br)[N+](=O)[O-])Br
-6.531285	-3.2711358	1.7853715	3.260149	1.4747775	C1=C(C=C2C(=C1Br)C(=O)C(=O)N2)Br	BrC(OC(Br)=C/1)=CC1=C(C#N)\C#N
-6.813264	-2.3375916	2.9932652	4.4756722	1.4824071	C1=C(N=CC(=N1)Br)Br	CC1=CC(=C(C(=C1)Br)[N+]#[C-])Br
-5.728553	-1.6821926	2.9483998	4.04636	1.0979602	C1=C2C=C(SC2=CC3=C1SC(=C3)Br)Br	C1CC(=O)NC2=C(C=C(C=C21)Br)Br
-5.982204	-1.8406789	2.8568456	4.1415253	1.2846797	CC1=NC(=C(C(=C1)Br)N)Br	O=S3(=O)c1ccc(Br)cc1c2cc(Br)ccc23
-5.823046	-2.543952	2.0840082	3.2790942	1.195086	C1=CC(=NC(=C1N)Br)Br	O=C1N(C)C2=CC(Br)=CC=C2/C1=C/C=C1C2=CC=C(Br)C=C2N(C)C/1=O
-6.703895	-3.5316954	2.2521713	3.1721997	0.92002845	C1=C(N=C(C2=NC=NN21)Br)Br	O=C(N1)C2=C3C(C4=C(Br)C=C3C1=O)=C(C1=C3C(C5=CC=C34)=C(C(NC5=O)=O)C=C1Br)C=C2
-5.946584	-2.4675517	2.2763345	3.4790325	1.202698	CC1=CC(=C(C(=C1)Br)C)Br	CN%66C(C%67=CC%68=C(Br)SC(Br)=C%68C=C%67C%66=O)=O
-7.4396486	-2.9107652	3.0827801	4.5288835	1.4461033	C1=C(C=C(C(=C1Br)[N+](=O)[O-])Br)Cl	[O-][N+](=O)c1cc(Br)ccc1Br
-5.7090273	-1.4261978	2.8781667	4.2828293	1.4046626	C1=C(C=C2C(=C1Br)N=C(S2)N)Br	BrC%69=C(OC)C(OC)=C(Br)S%69
-5.700711	-1.9345804	2.5886626	3.7661304	1.1774678	CC(C)(C)N=[N+](C1=CC(=CC(=C1N)Br)Br)[O-]	C1=CC(=C2C(=C1Br)C=CN2)Br
-5.8557315	-2.0109804	2.5586321	3.8447511	1.286119	C1=C(C(=C(C(=C1Br)Cl)Br)N)F	BrC1=CC(C2(OCCO2)C2=C3SC(Br)=C2)=C3S1
-6.4765854	-1.1664685	3.6596723	5.310117	1.6504445	C1=C(C=C(C(=C1Br)Cl)Br)F	CC1=C(C=C(C=C1Br)OC)Br
-5.6786246	-1.5014613	2.9501305	4.177163	1.2270327	CC1=CC(=C(C(=C1C)Br)N)Br	CCOC1=C(N=C(C(=C1)N)Br)Br
-6.163178	-2.332456	2.7315295	3.8307219	1.0991924	C1=C(C2=NC=NN2C=C1Br)Br	O=C(Br)C%78=CC(S%79)=C(S%78)C%80=C%79C=C(C(SC(C(Br)=O)=C%81)=C%81S%82)C%82=C%80
-6.137384	-1.1135263	3.5227616	5.0238576	1.501096	C1=CC(=C(C(=C1)Br)Cl)Br	COC1=CC(=C(C=C1Br)Br)OC
-7.0681615	-2.0938063	3.604835	4.974355	1.3695202	C1=C(C=C(C(=C1Br)C#N)F)Br	C1=C(C=C(C(=C1Cl)Br)F)Br
-7.1462693	-3.5471363	1.8988595	3.599133	1.7002735	C1=CC(=C(C(=C1Br)F)F)Br	O=c1cc(Br)c(=O)cc1Br
-5.9828234	-1.837056	2.6990545	4.145767	1.4467127	C1=CC(=NC(=C1N)Br)Br	COC(=O)C1=C(NC(=N1)Br)Br
-5.926342	-1.8033326	3.2374885	4.1230097	0.8855212	C1=CC2=C(C=C1Br)S(=O)(=O)C3=C2C=CC(=C3)Br	C1=C(C=NC(=C1Br)N)Br
-6.8228283	-2.110249	2.8755753	4.7125793	1.837004	CC(=O)C1=CC(=CC(=C1)Br)Br	CC1=CC(=NN=C1Br)Br
-7.036097	-2.4528933	3.185223	4.583204	1.3979807	C1=CC(=C(C=C1Br)C#N)Br	CC1=CC(=C(C=C1Br)[N+](=O)[O-])Br
-6.403395	-2.881473	2.0193868	3.521922	1.5025353	CC1=CC(=CC(=C1C)Br)Br	C1=CC2=C(C=C1Br)C(=O)C(=O)C3=C2C=CC(=C3)Br
-5.732315	-0.90523326	3.378664	4.8270817	1.4484177	C1=C(C(=CC(=C1F)Br)Br)N	CC1=C(C=CC(=C1Br)N)Br
-6.081417	-1.9847603	2.9458833	4.096657	1.1507735	C1=CN2C=C(N=C(C2=N1)Br)Br	C1=CC2=C(C=CC(=C2)Br)C=C1Br
-7.207714	-2.6694071	2.9677312	4.538307	1.570576	C1=C(C=C(C(=C1Br)F)C=O)Br	C1=C(C(=C(C(=C1F)Br)[N+](=O)[O-])Br)F
-6.317304	-2.30135	2.6350424	4.015954	1.3809116	CC1=C(C(=C(C=C1Cl)Br)N)Br	C1=C(C(=C(C=N1)Br)C=O)Br
-6.775408	-1.1177385	4.0209546	5.657669	1.6367145	C1=CC(=C(C(=C1Cl)Br)Cl)Br	BrCc1ccc(CBr)cc1
-6.294805	-1.3048673	3.4704397	4.989938	1.5194981	C1COC2=CC(=CC(=C2C1N)Br)Br	C1=C(C(=CC(=C1Br)F)Br)F
-6.469321	-2.3015194	2.8647137	4.1678014	1.3030877	C1=C(N=C(C(=N1)Cl)Br)Br	C1=C(C(=CN=C1Br)Br)N
-5.856467	-1.4378774	3.213218	4.4185896	1.2053716	CC1=CC(=C(C=C1Br)N)Br	Brc1ccc(cc1)C(=O)c2ccc(Br)cc2
-5.692831	-1.9005053	2.5061939	3.7923257	1.2861319	COC1=C(C=C(C=C1Br)C(=NO)N)Br	BrC%61=C%62C(F)=CSC%62=C(Br)S%61
-6.3530083	-2.8682246	2.587347	3.4847836	0.8974366	C(=O)C1=C(N=C(S1)Br)Br	C1COCCC12C3=C(C=CC(=C3)Br)C4=C2C=C(C=C4)Br
-6.528676	-2.7533545	2.3728347	3.7753215	1.4024868	C1=C(C(=C(N=C1Br)Br)[N+](=O)[O-])N	C1=C(OC(=C1)Br)Br
-6.0038495	-1.7351193	3.0159106	4.26873	1.2528195	C1=CC(=NC(=C1Br)N)Br	N#CCS(=O)(C1=CC(Br)=CC=C1Br)=O
-5.6712976	-1.9374804	2.6404457	3.733817	1.0933714	C1(=C(N=C(C(=N1)Cl)Br)Br)N	BrC%53=CC=C%54C(N(C)C%55=C%54N(C)C%56=CC(Br)=CC=C%55%56)=C%53
-6.251085	-1.9682082	2.8919766	4.2828765	1.3908999	C1=C(C=C(C(=C1Br)F)C#N)Br	C1COC2=C(SC(=C2O1)Br)Br
-6.4198523	-1.4035844	3.4932976	5.016268	1.5229702	C1=CC(=C(C(=C1)Br)CN)Br	Brc2cccc(c1cccc(Br)n1)n2
-6.0283685	-1.7537494	2.8025885	4.274619	1.4720306	C1=C(C2=NC=C(N2C=C1Cl)Br)Br	O=C(O)c1cc(Br)cc(Br)c1
-6.7022457	-3.3736918	2.7050524	3.328554	0.62350154	C1=C(C2=NSN=C2C(=N1)Br)Br	O=S(OC)(C1=CC(Br)=CC=C1C1=CC=C(Br)C=C1S(OC)(=O)=O)=O
-5.912096	-1.7207376	2.78291	4.1913586	1.4084485	C1(=C(N=C(N1)Br)Br)C(F)(F)F	Brc1sc(Br)cc1
-6.2511587	-1.1624973	3.448264	5.088661	1.6403973	CC1=CC(=CC(=C1Cl)Br)Br	C1=C(C(=C(C(=C1Br)Cl)Br)N)F
-7.076104	-2.942861	2.814766	4.133243	1.3184772	COC1=C(C=NC=C1Br)Br	C12=C(SC(=C1C(=O)OC2=O)Br)Br
-6.024393	-2.1283634	2.5983932	3.8960297	1.2976365	C1=C2C(=C(C(=C1Br)N)Br)N=CN2	C1=CN=C(C2=C1N=C(S2)Br)Br
-6.417616	-2.0871947	3.2578897	4.3304214	1.0725317	C1=CC(=C2C(=C1Br)N=C(S2)Cl)Br	O=S3(=O)c1ccc(Br)cc1c2cc(Br)ccc23
-6.160665	-1.5031619	2.9528086	4.657503	1.7046945	CN1C=C(C=C(C1=O)Br)Br	COC1=C(C=NC=C1Br)Br
-6.6411157	-2.1357243	3.2566874	4.505391	1.2487037	C1=CC2=CC(=CN=C2C3=NC=C(C=C31)Br)Br	C1=C(C=C(N=C1Br)Br)F
-7.039199	-2.5589437	2.6604455	4.480255	1.8198097	C1=CC(=C(C(=C1)Br)CC#N)Br	C1=CN=C(C(=C1Br)C=O)Br
-5.8424726	-2.2690856	2.3699088	3.573387	1.2034781	CCCCC1=C(SC(=C1)Br)Br	C1=C(N=C(C(=N1)Br)N)Br
-5.839891	-1.6061413	2.9409993	4.2337494	1.2927501	C1=C(C(=C(C(=C1Br)Cl)C#N)N)Br	C1=C2C(=CN=C1Br)C(=CN2)Br
-5.9081273	-1.3113339	3.0931695	4.596793	1.5036237	C1=C(C(=C(C(=C1Br)Cl)Cl)N)Br	CCn3c1cc(Br)ccc1c2ccc(Br)cc23
-6.008236	-1.54816	2.9445305	4.460076	1.5155454	COC1=NC=C(C2=NNC(=C21)Br)Br	CC1=C(C(=C(C=C1F)Br)N)Br
-5.857547	-1.4533905	3.0231004	4.404156	1.3810558	CC1=C(N(C(=N1)Br)C)Br	C1=C(C=C(C=C1Br)Br)C#N
-6.2291956	-1.9031416	3.2160506	4.326054	1.1100035	C1=CC2=C(C=C(C=C2N=C1)Br)Br	BrC(C=C1)=CC2=C1C(C1=CC=CC=C1C(OC)=O)C(C=CC(Br)=C1)=C1O2
-6.500292	-2.3147464	2.793115	4.1855454	1.3924305	CC1=C(C=CN=C1Br)Br	CC(=O)C1=C(SC(=C1)Br)Br
-6.72313	-3.7077477	1.9508486	3.0153825	1.064534	C1=C(C=C(C=C1Br)Br)C(F)F	O=C(N1)C2=C3C(C4=C(Br)C=C3C1=O)=C(C1=C3C(C5=CC=C34)=C(C(NC5=O)=O)C=C1Br)C=C2
-6.310171	-2.941988	1.8767166	3.3681831	1.4914665	C1=CN=C(C(=C1Br)N)Br	C1=C(C=C2C(=C1Br)NC(=O)C2=O)Br
-6.360848	-1.8845685	2.9230301	4.4762793	1.5532491	CC(=O)C1=C(C=C(C=C1)Br)Br	O=C1C(Br)C2=CC=C(Br)C=C2N1C
-6.5512133	-1.9149653	3.5235765	4.636248	1.1126716	C1=CC=C(C=C1)OC2=CC(=CC(=C2)Br)Br	C1=C(C(=CN=C1Br)Cl)Br
-6.2361298	-2.688053	2.2853098	3.5480769	1.2627671	C1=CN2C=C(N=C(C2=N1)Br)Br	O=C(C1=C(F)C2=C(Br)SC(Br)=C2S1)OC
-6.8165846	-2.1981833	2.951446	4.6184015	1.6669555	C1=C(C=C(C(=C1Cl)Br)F)Br	CC1=CC(=NN=C1Br)Br
-5.7921247	-1.76042	2.6771395	4.031705	1.3545654	C1=C(C2=NNC(=C2C=N1)Br)Br	CC1=CC(=C(C(=C1)Br)N)Br
-5.700847	-1.3551755	2.8753679	4.3456717	1.4703038	CC(C)(C)C(=O)NC1=CC(=CC(=C1)Br)Br	C1=C(C=C2C(=C1Br)C(=NN2)N)Br
-6.196297	-2.3388257	2.633235	3.8574715	1.2242365	C1=CC2=NC(=NC=C2C=C1Br)Br	C1=CN=C(C(=C1Br)N)Br
-5.95864	-1.951553	2.597083	4.007087	1.4100041	CN=[N+](C1=CC(=CC(=C1N)Br)Br)[O-]	C1=CC2=C(C(=C1)Br)SC3=C2C=CC=C3Br
-6.086821	-2.0070205	2.69549	4.0798006	1.3843107	Br/C=C/Br	Brc2cccc(c1cccc(Br)n1)n2
-5.490467	-1.7110889	2.6078024	3.7793782	1.1715758	CC1=C(C=C(C=C1Br)OC)Br	BrC(S6)=CC7=C6C(SC(Br)=C8)=C8S7
-5.949305	-1.9695263	2.8275697	3.9797788	1.152209	C1=CC2=C(C=CC3=C2C4=C1C=CC(=C4C=C3)Br)Br	C1=C(C(=NC=C1Br)Br)F
-5.899353	-1.5559813	3.1455736	4.343372	1.1977983	CC1=C(C(=C(C=C1Br)Br)N)C	C1=CC2=C(C=C(C=C2N=C1)Br)Br
-5.9996223	-1.7185212	2.5850453	4.281101	1.6960559	C1=C(C(=C(C(=C1Br)N)Br)F)F	C1COC2=C(SC(=C2O1)Br)Br
-7.4844656	-2.9710593	3.1489744	4.5134063	1.3644319	C1=C(C(=C(C(=C1Br)F)[N+](=O)[O-])Br)F	CC1=C(C(=NC=C1Br)Br)[N+](=O)[O-]
-6.245149	-2.1419973	2.6784573	4.103152	1.4246945	CC(=O)C1=CC(=CC(=C1NC(=O)C)Br)Br	C1=C(C=C(C(=C1Br)N)Br)OC(F)F
-6.1210313	-2.3039947	2.6010017	3.8170366	1.2160349	C1=CC(=C2C(=C1Br)C=NN2)Br	C1=C(N2C=C(N=C(C2=N1)Br)Br)Cl
-5.6719027	-1.0273819	3.222752	4.6445208	1.4217687	C1=C(C=C(C=C1Br)Br)F	C1=CNC2=C(C=C(C=C21)Br)Br
-6.279741	-2.782377	2.3807058	3.4973638	1.116658	C1=C(C(=CC(=C1Br)C(=O)Cl)Br)C(=O)Cl	C1=C(C=C(C=C1Br)Br)C(=S)N
-6.162742	-1.2759348	3.5433044	4.8868074	1.343503	CCC1=CC(=CC(=C1Cl)Br)Br	C1=C(C2=C(S1)C(=CS2)Br)Br
-6.5740027	-1.3484727	3.5558367	5.22553	1.6696935	C1=C(C(=CC(=C1F)Br)Br)F	CCOC1=C(C=C(C=C1Br)F)Br
-5.794513	-2.3266234	2.3582783	3.4678898	1.1096115	C1=CC2=NC=C(N2C=C1Br)Br	BrC1=C(N=C(C)C(C)=N2)C2=C(Br)C2=NC(C)=C(C)N=C12
-5.9178963	-1.6447337	3.2384045	4.273163	1.0347583	C1=C(C=C2C(=C1Br)N=C(S2)N)Br	COC%48(OC)C%49=C(C=CC(Br)=C%49)C%50=C%48C=C(Br)C=C%50
-5.84002	-2.0128732	2.549172	3.827147	1.2779751	CC(=S)NC1=C(C=CC(=C1)Br)Br	C1=CC2=NNC(=C2C=C1Br)Br
-5.841369	-1.0652053	3.1404114	4.776164	1.6357527	C1CC2=CC(=CC(=C2NC1)Br)Br	C1=C(C(=C(C(=N1)Cl)Br)N)Br
-5.958539	-1.6803811	3.1053681	4.278158	1.17279	C1=CC=C2C(=C1)C3=C(C=CC(=C3)Br)C4=C2C=C(C=C4)Br	C1=C(C(=C(C(=C1Br)C(F)(F)F)Br)N)F
-6.391	-2.4382846	2.4163928	3.9527152	1.5363224	C1=C(C=C(C=C1Br)Br)C(F)(F)F	CC1=CC(=C(C(=C1[N+](=O)[O-])Br)N)Br
-6.175581	-2.1252947	2.6235363	4.0502863	1.42675	C1=C(C=C(C=C1Br)Br)OC(F)F	CC(C)(C)N=[N+](C1=CC(=CC(=C1N)Br)Br)[O-]
-6.220981	-1.4235042	3.3341615	4.797477	1.4633152	C1=CC=C2C(=C1)C(=CC=C2Br)Br	CC1=C(C=CC(=C1F)Br)Br
-5.9454727	-1.6912179	2.6933837	4.254255	1.5608711	C1=C(C=C(C(=C1Br)N)Br)C(F)(F)F	BrC#CBr
-5.6936884	-0.89945817	3.4314284	4.7942305	1.362802	CCC1=CC(=CC(=C1N)Br)Br	CC1=CC(=C(C=C1Br)Br)C
-6.6777577	-3.0661774	1.9927516	3.6115804	1.6188288	C1=C(C=C2C(=C1Br)NC(=O)C2=O)Br	C1=C(C=C2C(=C1Br)N=CN=C2Cl)Br
-6.3515296	-2.5069005	2.5507874	3.844629	1.2938416	CC1=C(C=C(C(=C1Cl)Br)Cl)Br	C1=CC2=C(C=C1Br)C3=CC(=CC(=C3N2)[N+](=O)[O-])Br
-6.897842	-2.656599	2.9190788	4.241243	1.322164	CC(=O)NC1=CC(=C(C=C1Br)[N+](=O)[O-])Br	CC1=C(C=CC(=C1C)Br)Br
-6.369218	-2.5918047	2.4921036	3.7774131	1.2853096	C1(=C(SC(=C1[N+](=O)[O-])Br)Br)[N+](=O)[O-]	CC1=C(C=C2C(=CNC2=N1)Br)Br
-5.80667	-0.9252131	3.2693043	4.8814573	1.612153	C1=CC2=C(C=C1Br)C3=C(N2)C=CC(=C3)Br	C1=C(C(=C(C(=C1Br)Cl)Br)N)F
-6.104004	-1.9889004	2.7262654	4.1151037	1.3888383	C1=C(C(=C(C(=C1Br)F)Br)N)F	CC(C)OC1=C(C=C(C=C1C=O)Br)Br
-5.7957644	-1.6793629	2.7527947	4.1164017	1.3636069	C1=CC=C2C(=C1)C3=C(C=CC(=C3)Br)C4=C2C=C(C=C4)Br	C1=C(C2=NC=C(N2C=C1Cl)Br)Br
-6.007428	-1.3000724	3.2922416	4.7073555	1.4151139	CC1=CC(=C(C(=C1)Br)F)Br	C1=C(C=C2C(=C1Br)N=C(S2)N)Br
-6.045282	-1.7962828	2.762868	4.248999	1.4861312	BrC1=CC=C2C3=CC=C(Br)C=C3OC2=C1	O=n1cc(Br)ccc1Br
-6.072715	-2.3953326	2.5694542	3.6773822	1.107928	C1=C(C(=CC(=C1Br)F)Br)[N+](=O)[O-]	CN(CC1=CC(=CC(=C1N)Br)Br)C2CCCCC2
-7.4016643	-2.8875723	3.1189535	4.514092	1.3951385	C1=CC(=C(C(=C1[N+](=O)[O-])Br)F)Br	C1=C(C(=NC=C1Br)Br)C#N
-5.899519	-1.7025801	2.960323	4.196939	1.2366159	CC1=C(C(=CC(=C1F)Br)Br)N	C1=CC(=CC2=C1C=CC(=N2)Br)Br
-5.638717	-1.741166	2.3989258	3.897551	1.4986253	CC(=O)C1=CC(=CC(=C1N)Br)Br	C1=C(NC(=N1)Br)Br
-6.1739435	-1.8791522	2.9124062	4.294791	1.382385	C1=C(C(=CN=C1Br)Br)C(F)(F)F	CC1=C(C=C(S1)Br)Br
-5.5205097	-1.9340296	2.442215	3.5864801	1.1442652	COC1=C(C=CC=C1Br)Br	Br/C=C/C%30=CC=C(Br)S%30
-5.8498335	-1.9804308	2.6286395	3.8694026	1.2407632	CC1=C(C=C(C(=N1)C)Br)Br	BrC%61=C%62C(F)=CSC%62=C(Br)S%61
-5.9098783	-1.1222454	3.3332295	4.787633	1.4544034	C1=C(C(=C(C(=C1Br)F)Br)N)F	CC(C)C1=C(C=CC(=C1)Br)Br
-5.6655483	-1.4944757	2.8074296	4.1710725	1.3636429	COC1=CC(=CC(=C1N)Br)Br	BrC#CBr
-5.8976865	-1.0698318	3.2803254	4.8278546	1.5475292	C1=C(C=C(C(=C1Br)N)F)Br	C1=CC=C(C(=C1)Br)Br
-5.773564	-1.5435047	3.0658967	4.230059	1.1641624	CC1=C(C(=C(C=C1Br)Br)N)C	C1=CC2=C(C=C1Br)SC(=N2)Br
-5.787707	-1.181522	3.167432	4.606185	1.4387529	C1=C(C(=CN=C1Br)N)Br	C1=C(C(=CC(=C1F)Br)Br)N
-5.1130285	-2.062374	2.0743053	3.0506544	0.9763491	BrC4=CC5=C(SC(Br)=C5)S4	BrC%96=CC(C%97(SCCS%97)C%98=C%99SC(Br)=C%98)=C%99S%96
-6.7705097	-2.8049169	2.4782867	3.9655929	1.4873061	C1=CC(=C(C=C1Br)Br)C(F)(F)F	O=C%59C%60=C(Br)SC(Br)=C%60C(N%59C)=O
-6.352557	-1.3513753	3.4666717	5.0011816	1.5345099	C1=C(C=NC(=C1Br)F)Br	C1CCOC(C1)COC2=C(C=C(C=C2)Br)Br
-6.6484485	-1.9905455	3.3556623	4.6579027	1.3022404	C1(=C(N=C(N1)Br)Br)C(F)(F)F	C1(=C(C(=C(C(=C1F)F)Br)F)F)C2=C(C(=C(C(=C2F)F)Br)F)F
-6.740288	-2.693521	2.9442427	4.0467668	1.102524	C1(=NN=C(S1)Br)Br	C1=CC2=C(C=CN=C2C3=NC=CC(=C31)Br)Br
-6.2162075	-2.4957948	2.584224	3.7204127	1.1361887	CC1=C(C(=CC(=C1Cl)Br)Br)N	C1=CC(=C(C=C1Br)[N+](=O)[O-])Br
-6.9315987	-2.0817142	3.5268016	4.8498845	1.3230829	C1=CC(=C(C(=C1Br)F)Cl)Br	C1=C(C(=NC=C1Br)Br)Cl
-6.3549767	-2.7663288	2.3593078	3.5886478	1.2293401	CC1=C(C(=C(C=C1F)Br)N)Br	C1=C(C(=CN=C1Br)[N+](=O)[O-])Br
-6.5233593	-1.9755967	3.3930438	4.547763	1.1547191	CC1=C(C=CC(=C1F)Br)Br	C1=C(C=C2C(=C1Br)N=C(S2)Cl)Br
-6.1371717	-1.3841751	3.312428	4.7529964	1.4405684	C1=C(C=C(C(=C1Br)N)Br)C(F)(F)F	CC1=C(C(=NC=C1Br)N)Br
-6.3367133	-2.7195575	2.5150733	3.6171558	1.1020825	CN1C(=C(N=C1Br)F)Br	O=C1C2=C(C)SC(C)=C2C(C2=C(Br)SC(Br)=C21)=O
-5.6329193	-1.9923781	2.4740355	3.640541	1.1665056	C1=C(C2=NC(=CN=C2N1)Br)Br	BrC1=C2C(OCCO2)=C(Br)S1
-6.2551727	-1.5633075	2.9154758	4.691865	1.7763891	CCC1=CC(=CC(=C1)Br)Br	C1=C(C(=NN=C1Br)N)Br
-5.6809	-1.4761002	2.567164	4.2047997	1.6376357	CC(=S)NC1=C(C=CC(=C1)Br)Br	C1CCN(C1)C2=CC(=CC(=C2)Br)Br
-5.7510796	-1.4623686	3.0593371	4.288711	1.2293739	C1=C(C=C(C=C1Br)Br)CC(F)(F)F	Oc1ccc2cc(Br)ccc2c1c3c(O)ccc4cc(Br)ccc34
-5.9695096	-1.6977985	3.0038304	4.2717113	1.2678809	C1=CC(=C(C=C1Br)N)Br	C1=C(C(=NC=C1Br)Br)C(F)(F)F
-6.582524	-1.9927697	3.152139	4.589754	1.4376152	C1=C(C=C(C=C1Br)Br)OC(F)F	BrC1=NC2=CC=C(Br)C=C2O1
-5.9703918	-1.528934	3.2934232	4.4414577	1.1480346	C1=CC(=C(C=C1Br)N=C=S)Br	C1=C(C=NC(=C1Br)N)Br
-5.513453	-0.7773733	3.1464143	4.7360797	1.5896654	CC1=CC(=CC(=C1)Br)Br	C1CCN(C1)C2=CC(=CC(=C2)Br)Br
-6.8446918	-2.0100796	3.3552685	4.834612	1.4793434	C1=C(C(=CC(=C1Br)F)Br)F	C1=CN=C(C=C1Br)Br
-6.294061	-2.4403043	2.5282269	3.853757	1.32553	C1=C(C(=C(C(=C1Br)Cl)Br)N)F	BrC1=CC=C(Br)S1(=O)=O
-5.970004	-1.8822122	2.8621185	4.087792	1.2256734	CC(C)OC1=C(C=C(C=C1C=O)Br)Br	C1=CC=C(C=C1)N2C3=C(C=CC(=C3)Br)C4=C2C=C(C=C4)Br
-6.234439	-2.259064	2.6105766	3.975375	1.3647983	CC1=C(C(=CC(=C1Cl)Br)Br)N	C1=C(C(=C(C=N1)Br)C=O)Br
-5.9419193	-1.9179589	2.6386898	4.0239606	1.3852708	CC1=CN2C(=CN=C2C(=C1)Br)Br	C1=C(C(=CN=C1Br)Br)F
-7.0032473	-1.4258518	3.8882127	5.5773954	1.6891828	C1=C(C(=C(C(=C1F)Br)F)Br)F	CC1=C(C=C(C(=C1Cl)Br)Cl)Br
-6.5805774	-2.1406436	3.1020422	4.439934	1.3378916	C1=C(N=CC(=N1)Br)Br	CC1=CC(=C(C=C1Br)Cl)Br
-6.0285397	-1.4838591	3.0527272	4.5446806	1.4919534	C1=C(C=C2C(=C1Br)N=C(S2)N)Br	O=n1cc(Br)ccc1Br
-5.9432626	-1.4257907	2.9564083	4.517472	1.5610635	C1=CC2=NC=C(N2C=C1Br)Br	C1CCOC(C1)N2C(=NC(=N2)Br)Br
-6.542819	-2.7388477	2.651316	3.8039713	1.1526554	C1=CC(=C(C=C1Br)NN)Br	C1=C(C(=CN=C1Br)Br)C=O
-7.3835106	-3.5503972	2.718915	3.8331134	1.1141984	C1=CC(=C(C=C1Br)Br)C(F)(F)F	BrC1=C([N+]([O-])=O)C([N+]([O-])=O)=C(Br)C2=NSN=C12
-6.5992794	-2.6171248	2.7253957	3.9821546	1.2567589	C1=C(N2C=C(N=C(C2=N1)Br)Br)Cl	C1(=NN=C(S1)Br)Br
-5.819236	-1.3665509	3.0252779	4.452685	1.427407	CN(CC1=CC(=CC(=C1N)Br)Br)C2CCCCC2	C1=CC(=NC(=C1F)Br)Br
-5.992483	-1.4365644	3.0049062	4.5559187	1.5510125	C1=CC(=C(C(=C1)Br)CC#N)Br	C1=CNC2=C1C(=NC=C2Br)Br
-5.637316	-2.0649424	2.4502711	3.5723739	1.1221027	C1=CC(=C2C=NC=CC2=C1Br)Br	BrC(S6)=CC7=C6C(SC(Br)=C8)=C8S7
-6.0816956	-1.9217696	2.8708472	4.159926	1.2890787	CC(=O)C1=CC(=CC(=C1)Br)Br	C1=CSC(=C1Br)C2=C(C=CS2)Br
-6.1677465	-1.8089447	3.187736	4.358802	1.1710658	C1=C(C=C(C(=C1Br)N)Br)F	C1=C(C(=C(C(=N1)N)Br)C(F)(F)F)Br
-6.381329	-3.0217752	1.9235697	3.3595538	1.4359841	C1=C(C(=C(N=C1Br)Br)[N+](=O)[O-])N	O=C1N(C)C2=CC(Br)=CC=C2/C1=C1C2=CC=C(Br)C=C2N(C)C/1=O
-6.2200623	-2.738854	2.276956	3.4812083	1.2042522	CC1=CN2C(=CN=C2C(=C1)Br)Br	C1=C(C(=CN=C1Br)Br)[N+](=O)[O-]
-5.6860547	-2.7345262	2.0695794	2.9515285	0.8819492	FC%71=NC%72C(Br)=CC=C(Br)C%72N=C%71F	Br/C=C/Br
-6.369054	-1.5081459	3.3558173	4.860908	1.5050907	COC1=CC(=C(C(=C1)Br)Cl)Br	CC1=CC(=NC(=C1)Br)Br
-6.905415	-2.6194773	2.787866	4.285938	1.4980717	CC1=CC(=C(C(=C1)Br)Cl)Br	C1=CC(=NC(=C1C=O)Br)Br
-6.078824	-3.306074	1.8396418	2.7727501	0.9331083	BrC%28=NC%29=C(N=C(Br)S%29)S%28	O=C(C1=C(F)C2=C(Br)SC(Br)=C2S1)OC
-6.6860237	-2.1558084	2.7193856	4.5302153	1.8108296	CCC1=CC(=CC(=C1Br)CC)Br	BrC%93=NN=C(Br)C=N%93
-6.728393	-2.566749	2.528387	4.161644	1.6332569	CC(=O)C1=C(C=C(C=C1)Br)Br	BrC%93=NN=C(Br)C=N%93
-6.424966	-1.6258429	3.5120783	4.799123	1.2870445	CC1=C(C(=C(C(=C1Br)C)C)Br)C	O=S3(=O)c1ccc(Br)cc1c2cc(Br)ccc23
-6.5842886	-2.42923	2.994731	4.155059	1.1603279	C1=CC(=C(C=C1Br)Br)[N+](=O)[O-]	C1=CC2=C(C=CC(=C2)Br)C=C1Br
-6.482664	-2.0950587	3.3399887	4.3876057	1.047617	C1=CC(=C(C=C1Br)C(F)(F)F)Br	C1=C(C=C(C(=C1Br)N=C=S)OC(F)(F)F)Br
-5.767549	-2.6535513	2.4484916	3.1139977	0.6655061	C1=C(C=C(N2C1=CN=C2)Br)Br	BrC(C=N1)=CC2=C1C(N=CC(Br)=C1)=C1C1=NSN=C21
-5.9653225	-2.5014129	2.2813566	3.4639096	1.182553	C1=CN2C=C(C=C(C2=N1)Br)Br	O=C1NC(C2=CC3=C(Br)SC(Br)=C3C=C21)=O
-5.8624864	-1.1371132	3.3134475	4.7253733	1.4119258	C1=CC=C(C=C1)OC2=CC(=CC(=C2)Br)Br	C1=CC(=C(C(=C1N)Br)F)Br
-7.245183	-2.6388	3.150225	4.6063833	1.4561584	C1=CC(=C(C(=C1)Br)[N+](=O)[O-])Br	C1=CC(=C(C(=C1)Br)C#N)Br
-6.7741103	-2.357987	3.1242292	4.4161234	1.2918942	CC1=CC(=C(C=C1Br)C)Br	CC1=CC(=CC(=C1[N+](=O)[O-])Br)Br
-6.7416053	-2.9799094	1.8574264	3.7616959	1.9042695	C1=C(C=C(C=C1Br)Br)CC(F)(F)F	C1=C(C=C2C(=C1Br)C(=O)C(=O)N2)Br
-6.448962	-2.3341103	2.8535342	4.114852	1.2613177	C1=CC2=CC(=C(N=C2N=C1)Br)Br	Brc3ccc(N(c1ccccc1)c2ccc(Br)cc2)cc3
-6.1488967	-1.3445566	3.330323	4.8043404	1.4740174	C1=C(C=C2C=NNC2=C1Br)Br	CC(C)C1=CC(=CC(=C1Cl)Br)Br
-6.047796	-2.5646882	2.4547267	3.4831076	1.0283809	C1CCN(C1)C2=CC(=CC(=C2)Br)Br	C1=C(C(=NC=C1Br)Br)[N+](=O)[O-]
-6.714574	-3.3863704	2.3166585	3.3282034	1.011545	C1=CC(=C(C(=C1Br)C=O)F)Br	O=C(N1)C2=C3C(C4=C(Br)C=C3C1=O)=C(C1=C3C(C5=CC=C34)=C(C(NC5=O)=O)C=C1Br)C=C2
-6.545929	-2.107193	3.243358	4.438736	1.1953781	C1=C(C=C(C=C1Br)Br)C#N	C1=CC(=NC=C1Br)C2=NC=C(C=C2)Br
-5.745982	-1.9282856	2.973229	3.8176966	0.84446764	C1=CC2=C(C=C1Br)C3=C(N2)C=CC(=C3)Br	C1=CC=C(C=C1)C2=NC3=C(C=CC(=C3S2)Br)Br
-5.9556975	-2.4840884	2.308145	3.471609	1.1634641	COCN1C(=NC(=N1)Br)Br	BrC1=CC(C2(OCCO2)C2=C3SC(Br)=C2)=C3S1
-6.8409495	-2.3571672	3.2382402	4.4837823	1.245542	CC1=CC(=CC(=C1)Br)Br	C1=C(N=C(C(=N1)Cl)Br)Br
-6.759053	-2.3696713	2.9022462	4.389382	1.4871356	CC(=O)C1=C(C=C(C=C1)Br)Br	C1(=NN=C(S1)Br)Br
-6.290512	-2.1055312	3.043354	4.184981	1.1416268	C1=C(C=C(C(=C1Br)N)OC(F)(F)F)Br	C1=C(C(=C(C=N1)Br)C#N)Br
-6.8174067	-2.9451284	2.638934	3.8722782	1.2333443	CC1=CC(=CC(=C1)Br)Br	COC1=C(N=C(C(=C1)[N+](=O)[O-])Br)Br
-6.071983	-1.915517	2.5934365	4.156466	1.5630295	C1=C(C(=C(N=C1C(F)(F)F)Br)N)Br	BrC4=CC5=C(SC(Br)=C5)S4
-6.506767	-1.4765015	3.5554972	5.0302653	1.4747682	CC(C)C1=C(C=CC(=C1)Br)Br	CC1=NC(=CC(=C1)Br)Br
-5.891518	-1.1816765	3.3630958	4.7098417	1.346746	C1=C(C=C(C=C1Br)Br)OC(F)F	CC1=CC(=C(C(=C1Br)C)Br)N
-6.5079913	-2.0850813	3.2146626	4.4229097	1.2082472	C1=CC=C(C=C1)C(=O)NC2=C(C=CC(=C2)Br)Br	BrC1=CC=C(C(C=CC(Br)=C2)=C2B2C3=CC=CC=C3)C2=C1
-5.474293	-1.8409921	2.6016078	3.6333013	1.0316935	C1COC2=C(SC(=C2O1)Br)Br	Brc1ccc(cc1)c2ccc(Br)cc2
-6.0464783	-1.746817	3.083212	4.299661	1.2164493	CC1=CC(=C(C(=C1N)Br)F)Br	C1=C(C(=NC=C1Br)Br)C(F)(F)F
-6.502195	-3.160582	1.8176104	3.3416128	1.5240024	CN1C(=C(N=C1Br)C#N)Br	C1=CC2=C(C=C1Br)C(=O)C(=O)C3=C2C=CC(=C3)Br
-5.847719	-1.4039296	3.06874	4.4437895	1.3750496	CC1=CC(=C(C(=C1Cl)Br)N)Br	Oc1ccc2cc(Br)ccc2c1c3c(O)ccc4cc(Br)ccc34
-6.4215817	-1.4122483	3.4059825	5.0093336	1.6033511	CC(C)(C)OC1=C(C=C(C=C1)Br)Br	C1(=NC(=NN1)Br)Br
-5.5719566	-1.8195232	2.5194616	3.7524333	1.2329717	C1=C(C2=NC(=CN=C2N1)Br)Br	C1=C(C=C(N2C1=CN=C2)Br)Br
-5.564171	-1.3721154	2.7146316	4.1920557	1.4774241	C1CC2=C(C(=CC(=N2)Br)Br)NC1	CC1=CN2C(=CN=C2C(=C1)Br)Br
-6.2053337	-2.129717	2.7869053	4.075617	1.2887115	C1=CC2=CC(=C(N=C2N=C1)Br)Br	CC1=CC(=C(N=C1Br)Br)N
-5.9834323	-2.1175692	1.5691301	3.865863	2.296733	CS(=NC1=C(C=C(C=C1[N+](=O)[O-])Br)Br)(=O)C	C1=CC2=C(C=C1Br)C(=CO2)Br
-6.6895223	-3.1298418	2.5318494	3.5596805	1.0278311	C1(=C(N=C(N1)Br)[N+](=O)[O-])Br	BrC(OC(Br)=C/1)=CC1=C(C#N)\C#N
-6.4311438	-1.2515178	3.3381178	5.179626	1.8415082	CC1=C(C(=C(C=C1)Br)C)Br	O=n1cc(Br)ccc1Br
-5.944208	-1.6013944	3.1582992	4.3428135	1.1845143	C1=C(C=C(C(=C1Br)N)OC(F)(F)F)Br	C1=CC2=C(C(=C1)Br)OC3=C2C=CC=C3Br
-6.76155	-2.2041466	3.2285457	4.5574036	1.3288579	CC1=NC(=CC(=C1)Br)Br	C1=C(C(=CN=C1Br)Br)F
-5.152882	-1.29664	2.6584196	3.8562422	1.1978226	BrC%53=CC=C%54C(N(C)C%55=C%54N(C)C%56=CC(Br)=CC=C%55%56)=C%53	COc1cc(Br)c(OC)cc1Br
-5.929102	-1.567118	3.1553504	4.361984	1.2066333	C1COCCN1C2=CC(=CC(=C2)Br)Br	C1=CC=C(C=C1)C(=O)NC2=C(C=CC(=C2)Br)Br
-5.8999887	-1.1409321	3.3074465	4.7590566	1.4516101	C1=CC=C(C=C1)OC2=CC(=CC(=C2)Br)Br	C1COC2=C(C=C(C=C21)Br)Br
-7.353801	-3.4983613	2.7801585	3.8554394	1.0752809	C1=C(C(=CC(=C1Br)C(=O)Cl)Br)C(=O)Cl	O=C%51C%52=C(Br)SC(Br)=C%52C(C%51)=O
-6.193826	-1.9394513	2.8734229	4.254375	1.3809521	C1=C(C(=C(C(=C1Br)Cl)C#N)N)Br	CC%45(OC)C%46=C(C=CC(Br)=C%46)C%47=C%45C=C(Br)C=C%47
-6.1632614	-3.1061802	1.710775	3.0570812	1.3463062	C1=C(C(=CC(=C1Br)C=O)Br)C=O	C1=C(SC2=C1C(=O)C3=C2SC(=C3)Br)Br
-7.134744	-2.525546	3.1463618	4.609198	1.4628363	CC1=C(N=C(C=C1)Br)Br	CN1C(=C(C(=N1)Br)[N+](=O)[O-])Br
-6.504828	-2.0860362	2.8369586	4.418792	1.5818331	CC(=O)C1=C(C=C(C=C1)Br)Br	C1=C(C(=NN=C1Br)N)Br
-6.5003	-2.3197641	2.8123899	4.180536	1.368146	CC(C)(C)OC1=C(C=C(C=C1)Br)Br	C1=C(C=C(N=C1Br)Br)C=O
-5.690474	-1.6264279	2.6797001	4.064046	1.3843458	CC1=CC(=C(C=C1Br)Cl)Br	BrC(S%13)=CC%14=C%13C(SC(Br)=C%15)=C%15C%14(C)C
-7.6932898	-3.0311482	3.122008	4.662142	1.5401337	C1=CC(=C(C(=C1[N+](=O)[O-])Br)F)Br	C1=CN=C(C(=C1Br)C#N)Br
-6.3622246	-2.9099433	1.6297889	3.4522812	1.8224924	CC1=C(SC(=N1)Br)Br	CCN1C2=C(C=C(C=C2C(=O)C1=O)Br)Br
-6.3644037	-2.3970478	2.8646772	3.967356	1.1026788	COC1=CC(=C(C=C1Br)Br)OC	C1=CN=C(C2=C1N=C(S2)Br)Br
-5.755022	-1.2162819	3.0606573	4.53874	1.4780829	C1CCN(C1)C2=CC(=CC(=C2)Br)Br	CC1=NC(=C(C=C1Br)Br)F
-6.8424454	-2.7188613	2.8441033	4.123584	1.2794805	CC(C)C1=C(C=CC(=C1)Br)Br	C1(=C(SC(=C1[N+](=O)[O-])Br)Br)[N+](=O)[O-]
-5.6340475	-1.2226032	2.8685884	4.411444	1.5428557	CC1=CC(=CC(=C1Cl)Br)Br	BrC%83=CC(SC%84=CC(Br)=CC%85=C%84N%86C=C%85)=C%86C=C%83
-5.9327183	-1.1794803	3.2355816	4.7532377	1.5176561	CC(=O)NC1=C(C=CC(=C1)Br)Br	CC1=CC(=C(C(=C1C)Br)N)Br
-5.242838	-2.1840239	2.0969486	3.058814	0.9618654	BrC%96=CC(C%97(SCCS%97)C%98=C%99SC(Br)=C%98)=C%99S%96	Br/C=C/Br
-5.8712893	-1.9930192	2.5965014	3.8782701	1.2817688	C1=CC=C2C(=C1)C(=C3C=CC=CC3=C2Br)Br	O=S3(=O)c1ccc(Br)cc1c2cc(Br)ccc23
-6.8026605	-2.5785246	3.0543592	4.224136	1.1697767	CCC1=CC(=CC(=C1Br)CC)Br	C12=C(SC(=C1C(=O)OC2=O)Br)Br
-6.6941323	-2.271636	3.2102566	4.4224963	1.2122397	C1=C(C=C(C(=C1Br)Cl)OC(F)(F)F)Br	C1=CC2=C(C3=C1C=CC(=N3)Br)N=C(C=C2)Br
-6.858721	-1.4253902	3.712192	5.4333305	1.7211385	C1=C(C=C(C(=C1Br)Cl)Cl)Br	C1=CC(=C(C(=C1)Br)CC#N)Br
-6.4581985	-2.4408736	2.8532715	4.017325	1.1640534	C1=C(C(=C(C(=C1Br)Cl)Br)N)Cl	C12=C(SC(=C1C(=O)OC2=O)Br)Br
-5.3748627	-1.5180202	2.619811	3.8568425	1.2370315	CC1=C(N(C(=N1)Br)C)Br	C1=C(SC2=C1SC3=C2SC(=C3)Br)Br
-6.5142827	-3.3878922	1.938015	3.1263905	1.1883755	BrC(C=C1)=CC2=C1C(C1=CC=CC=C1C(OC)=O)C(C=CC(Br)=C1)=C1O2	O=c1cc(Br)c(=O)cc1Br
-5.996523	-2.3641455	2.6308997	3.6323774	1.0014777	FC%71=NC%72C(Br)=CC=C(Br)C%72N=C%71F	BrC1=CC=C(OC2=CC=C(Br)C=C22)C2=C1
-6.015174	-1.6470551	3.2229514	4.368119	1.1451674	CC1=CC(=NC(=C1)Br)Br	C1COCCC12C3=C(C=CC(=C3)Br)C4=C2C=C(C=C4)Br
-6.0509114	-1.8775828	2.7130134	4.1733284	1.460315	C1=C(N=C(N=C1Br)N)Br	CN1C=C(C(=O)C(=C1)Br)Br
-6.4606876	-2.0318508	2.7974997	4.428837	1.6313372	CC(=O)C1=CC(=CC(=C1NC(=O)C)Br)Br	COC1=CC(=CC(=C1)Br)Br
-6.392008	-1.810279	3.0399995	4.581729	1.5417295	[C-]#[N+]C1=C(C=C(C=C1Br)F)Br	Brc3ccc(N(c1ccccc1)c2ccc(Br)cc2)cc3
-6.4392066	-2.2154205	3.0118632	4.2237864	1.2119231	C1=C(C=C(C(=C1Br)N=C=S)OC(F)(F)F)Br	C1=C(C(=C(C(=C1Br)Cl)C#N)N)Br
-5.734556	-1.1462373	2.950574	4.588319	1.6377449	CC1=C(C(=C(C=C1)Br)C)Br	C1=C(C=C2C(=C1Br)C(=NN2)N)Br
-5.826659	-1.3689339	2.9830072	4.4577255	1.4747183	C1=C(C=C(C(=C1Br)N)C(F)(F)F)Br	CC1=CC(=C(N=C1Br)Br)N
-5.929643	-2.430821	2.5389905	3.4988222	0.9598317	CC1=C(C=C(C=C1Br)OC)Br	C1=CC2=C(C=C1Br)C3=CC(=CC(=C3N2)[N+](=O)[O-])Br
-7.2145767	-2.6466463	3.1936765	4.56793	1.3742537	C1=C(C(=C(C(=C1Br)F)[N+](=O)[O-])Br)F	Brc1cncc(Br)c1
-7.1098127	-2.3585057	3.2334833	4.751307	1.5178237	C1=C(C=C(C(=C1Br)Cl)C(F)(F)F)Br	C1=CN=C(N=C1Br)Br
-6.2177186	-2.1255758	2.7230575	4.092143	1.3690856	CC1=C(C(=CC(=C1Cl)Br)Br)N	C1=C(N2C(=NC=N2)C(=N1)Br)Br
-5.907042	-3.146113	2.169654	2.760929	0.5912752	C1=CC2=C(C3=NSN=C3C(=C2C=C1)Br)Br	BrC1=CC=C(OC2=CC=C(Br)C=C22)C2=C1
-6.6580834	-1.5775244	3.7068162	5.080559	1.3737426	CC1=CC(=CC(=C1Br)C)Br	C1(=C(C(=C(C(=C1F)F)Br)F)F)C2=C(C(=C(C(=C2F)F)Br)F)F
-6.555092	-2.508762	2.438635	4.04633	1.6076949	CC(=O)C1=NC(=CN=C1Br)Br	CC(C)(C)OC1=C(C=C(C=C1)Br)Br
-6.1776876	-1.2016547	3.4038239	4.976033	1.5722094	COC1=C(C=CC(=C1)Br)Br	Brc1cncc(Br)c1
-5.9395576	-1.7028087	2.8497655	4.2367487	1.3869832	CC1=CN2C=C(N=C(C2=N1)Br)Br	CC1=C(C=C2C(=CNC2=N1)Br)Br
-5.951734	-1.4756787	3.173794	4.476055	1.3022611	C1=CC(=C(C=C1Br)Br)N	C1=C(C(=CC(=C1Br)F)Br)C#N
-6.353662	-2.1674054	2.751744	4.1862564	1.4345124	C1=CC2=C(C(=C1)Br)N=C(C=C2)Br	C1=C(C(=C(N=C1C(F)(F)F)Br)N)Br
-6.1208158	-2.175905	1.699372	3.9449108	2.2455387	CS(=NC1=C(C=C(C=C1[N+](=O)[O-])Br)Br)(=O)C	C1=C(C(=NN=C1Br)N)Br
-6.3415856	-3.2001007	2.2411346	3.141485	0.90035033	CCC1=CC(=CC(=C1Br)CC)Br	BrC1=C(N=C(C)C(C)=N2)C2=C(Br)C2=NSN=C12
-6.270489	-2.4613695	2.6381392	3.8091197	1.1709805	C1=C(C(=CC(=C1Br)[N+](=O)[O-])Br)N	CC1=NC2=C(N=C1C)C(Br)=CC=C2Br
-5.6787524	-1.3614236	2.8335955	4.317329	1.4837334	C1=C2C(=C(C(=C1Br)N)Br)N=CN2	C1=C(C=C(N=C1N)Br)Br
-5.9064746	-1.4381255	3.008835	4.468349	1.4595139	CC1=C(C=C(C=N1)Br)Br	CCCCC1=C(SC(=C1)Br)Br
-6.9044933	-2.926599	2.7804327	3.9778943	1.1974616	C1=C(C=C(C(=C1Br)Cl)Cl)Br	C(=O)C1=C(N=C(S1)Br)Br
-6.5241566	-1.2042217	3.6692295	5.319935	1.6507053	CC1=C(C=CC(=C1C)Br)Br	BrC#CBr
-6.8836446	-1.7051934	3.7398758	5.178451	1.4385753	C1=CC(=C(C=C1Br)C(F)(F)F)Br	C1=C(C=C(C(=C1Cl)Br)F)Br
-5.9428897	-1.8856817	2.9433918	4.057208	1.1138163	CN(CC1=CC(=CC(=C1N)Br)Br)C2CCCCC2	BrC(OC(Br)=C/1)=CC1=C(C#N)\C#N
-5.9870477	-2.249022	2.6661916	3.7380257	1.0718341	CC1=CC(=C(C=C1Br)[N+](=O)[O-])Br	C1CCN(CC1)C2=CC(=CC(=C2)Br)Br
-6.952451	-3.1778476	2.632872	3.7746036	1.1417315	C1=C(C(=NC=C1Br)Br)F	CN(C9=O)C(C%10=C(Br)C=C%11C%12=C(C(N(C)C%11=O)=O)C(Br)=CC9=C%12%10)=O
-6.648088	-1.231346	3.7607412	5.416742	1.6560006	C1=C(C=C(C(=C1Br)Cl)Br)F	CC1=C(C=CC(=C1)Br)Br
-5.9242783	-1.5368018	3.1234133	4.3874764	1.2640631	C1=C(C=C(C(=C1Br)F)C#N)Br	C1CCN(CC1)C2=CC(=CC(=C2)Br)Br
-5.8135653	-2.3321729	2.4005494	3.4813924	1.080843	BrC4=CC5=C(SC(Br)=C5)S4	BrC%94=NC=CC(/C=C/Br)=N%94
-6.4034505	-1.0292006	3.556961	5.37425	1.8172889	CC(=O)NC1=CC(=CC(=C1)Br)Br	C1=CC(=C(C(=C1)Br)CN)Br
-5.980405	-1.0935999	3.2357204	4.886805	1.6510847	COC1=CC(=C(C(=C1)Br)Cl)Br	COC1=CC(=C(C(=C1)Br)N)Br
-6.633319	-3.8654716	1.9852632	2.7678473	0.7825841	C1=C(N=C(C(=N1)Cl)Br)Br	C12=C(C3=NSN=C3C(=C1N=S=N2)Br)Br
-6.5982914	-2.4705334	2.7989724	4.127758	1.3287857	C1=CC(=C(C=C1Br)[N+](=O)[O-])Br	C1=C(C(=NN=C1Br)N)Br
-6.387557	-1.3949089	3.5148063	4.992648	1.4778419	CC1=C(C=CC(=C1Cl)Br)Br	BrC1=CC=C2C3=CC=C(Br)C=C3OC2=C1
-6.8815556	-2.3442879	2.9371176	4.5372677	1.6001501	C1=CC(=C(C=C1Br)C=O)Br	C1=CC(=C(C(=C1Br)C=O)F)Br
-6.1157517	-2.0297809	3.041562	4.085971	1.0444088	C1=CC2=C(C=C1Br)NC3=C2C=CC(=C3)Br	C1=C(C=NC(=C1Br)C#N)Br
-6.562377	-1.392651	3.5401878	5.169726	1.629538	CC1=C(C=C(C=C1F)Br)Br	CC1=CC(=NC(=C1)Br)Br
-6.7271366	-1.4256041	3.708478	5.3015327	1.5930548	CC1=C(C=C(C=C1F)Br)Br	C1=C(C(=CC(=C1Br)Cl)Br)F
-5.9096317	-1.4526546	3.0395837	4.456977	1.4173932	C1(=C(N=C(N1)Br)Br)C(F)(F)F	C1COC2=C(C=C(C=C21)Br)Br
-5.7113657	-1.5015571	2.971917	4.2098083	1.2378914	C1=CC=C(C=C1)C2=C(C=C(C=C2)Br)Br	BrC1=C2C(OCCO2)=C(Br)S1
-7.008124	-2.800102	2.9062424	4.208022	1.3017797	CC1=CC(=C(C=C1Br)Br)C	C1=C(C(=CN=C1Br)[N+](=O)[O-])Br
-6.016014	-1.074313	3.2867947	4.941701	1.6549063	CC1=CC(=C(C(=C1Cl)Br)N)Br	Brc1cscc1Br
-6.13107	-1.4148169	3.1667647	4.7162533	1.5494885	CN1C(=C(N=C1Br)F)Br	CC1=C(C=NC=C1Br)Br
-6.8840523	-2.1396434	3.407092	4.7444086	1.3373165	C1=CC(=C(C(=C1)Br)F)Br	C1=C(C(=NC=C1Br)Br)C(F)(F)F
-5.9077034	-1.2726127	3.2789364	4.635091	1.3561544	C1=C(C=C2C(=C1Br)N=C(S2)N)Br	C1CC(=O)NC2=C(C=C(C=C21)Br)Br
-5.3569117	-1.1574258	2.791506	4.199486	1.4079797	C1=CC=C(C=C1)C2=CC(=CC(=C2)Br)Br	BrC%83=CC(SC%84=CC(Br)=CC%85=C%84N%86C=C%85)=C%86C=C%83
-6.4374523	-2.3541605	2.8127627	4.083292	1.2705293	C1=CN=C2C=C(C=NC2=C1Br)Br	C1=C(C(=C(C(=C1Cl)Br)Cl)Br)N
-5.7560377	-3.0100126	2.1356354	2.746025	0.6103897	CS(=O)(=O)C1=CC(=C(C(=C1)Br)N)Br	FC1=C(C2=CC(C)=C(Br)S2)C2=NSN=C2C(C2=CC(C)=C(Br)S2)=C1F
-6.94293	-2.8910778	2.6840982	4.051852	1.367754	CC(=O)C1=CC(=CC(=C1NC(=O)C)Br)Br	C1=C(C(=CN=C1Br)Br)[N+](=O)[O-]
-6.0256433	-1.9992043	2.7578475	4.026439	1.2685916	CC1=C(C=C(C=C1Br)S(=O)(=O)C(F)(F)F)Br	C1=CC2=C(N=C(C=C2C=C1Br)N)Br
-5.856371	-1.4228114	2.8964007	4.4335594	1.5371587	C1=C(C=C(C(=C1Br)F)Br)F	CC1=CC(=NC(=C1N)Br)Br
-5.810291	-0.9543003	3.376713	4.8559904	1.4792774	CC1=C(C=C(C=C1Br)N)Br	C1COC2=C(C=C(C=C21)Br)Br
-7.0063114	-3.0651422	2.7159445	3.9411693	1.2252247	C1=C(C=C(C(=C1Br)Cl)Cl)Br	COC1=C(N=C(C(=C1)[N+](=O)[O-])Br)Br
-5.9466395	-1.4715912	2.996931	4.475048	1.478117	CC1=CC(=C(N=C1Br)C)Br	BrC4=CC5=C(SC(Br)=C5)S4
-5.4886584	-1.9638118	2.5740862	3.5248466	0.95076036	C1=C(N=C(C(=N1)Br)N)Br	BrC%83=CC(SC%84=CC(Br)=CC%85=C%84N%86C=C%85)=C%86C=C%83
-6.633337	-1.944129	3.2369523	4.689208	1.4522557	COC1=C(C=CC=C1Br)Br	C1=C(N=CN=C1Br)Br
-6.691289	-1.9528879	3.2944999	4.738401	1.4439011	CC(=O)NC1=CC(=CC(=C1)Br)Br	C1=C(C(=NC=C1Br)Br)C(F)(F)F
-6.7022767	-2.9964147	1.9070942	3.705862	1.7987678	COC1=C(C=NC=C1Br)Br	C1=C(C=C2C(=C1Br)NC(=O)C2=O)Br
-6.537701	-2.3305616	2.7868044	4.2071395	1.420335	CC1=C(N=C(C=C1)Br)Br	C1=CC=C2C(=C1)C(=NC(=N2)Br)Br
-7.132578	-1.5133085	3.865067	5.6192694	1.7542024	C1=C(C(=C(C(=C1F)Br)F)Br)F	C1=C(C(=C(C(=C1F)Br)F)Br)F
-5.8639865	-1.7190922	2.7460725	4.144894	1.3988216	C1=CC=C2C(=C1)C=C(N=C2Br)Br	CC1=CN2C(=CN=C2C(=C1)Br)Br
-6.282353	-2.4423165	2.8415911	3.8400364	0.9984453	C1=CC2=C(C(=C1)Br)OC3=C2C=CC=C3Br	BrC(OC(Br)=C/1)=CC1=C(C#N)\C#N
-6.55303	-2.4409149	2.8303099	4.112115	1.281805	CC1=C(C=C(C=C1Br)S(=O)(=O)C(F)(F)F)Br	CC1=NC2=C(N=C1C)C(Br)=CC=C2Br
-5.4993067	-1.5646205	2.741798	3.9346862	1.1928883	CC1=CC(=C(C=C1Br)Br)OC	BrC(S6)=CC7=C6C(SC(Br)=C8)=C8S7
-6.971131	-2.8073387	2.9499416	4.163792	1.2138505	C1=C(C=C(C(=C1Br)Cl)C(F)(F)F)Br	C1=C2C=C(C=NC2=C(C=C1[N+](=O)[O-])Br)Br
-6.6315875	-1.244535	3.7605226	5.3870525	1.6265299	CCC1=CC(=CC(=C1Br)CC)Br	CC(C)C1=CC(=CC(=C1Cl)Br)Br
-6.921632	-2.3645768	3.2989535	4.557055	1.2581015	C1=CC(=C(C(=C1)Br)Cl)Br	C1=C(N=C(C(=N1)Cl)Br)Br
-6.9408503	-1.6106296	3.7247577	5.3302207	1.605463	Cc1cc(Br)cc(Br)c1[N+]#[C-]	C1=CC(=C(C(=C1Cl)Br)Cl)Br
-6.5194626	-2.7659612	2.7411184	3.7535014	1.012383	O=C1C2=C(C)SC(C)=C2C(C2=C(Br)SC(Br)=C21)=O	Brc1cscc1Br
-6.316396	-2.130943	3.1247118	4.1854534	1.0607417	C1=C(C(=C(C(=C1Br)Cl)Br)N)Cl	C1=CC2=CC(=CN=C2C3=NC=C(C=C31)Br)Br
-6.7512918	-1.6369948	3.6478648	5.114297	1.4664321	C1=C(C=C(C=C1Br)Br)OC(F)F	C1=C(C=C(C(=C1Br)Cl)Cl)Br
-5.9893413	-1.4014356	2.9453268	4.587906	1.6425791	CN1C(=C(N=C1Br)F)Br	C1=C(C=C(C(=C1Br)N)Br)C(F)(F)F
-6.1410036	-1.382725	3.0998635	4.758279	1.6584153	C1=C(C(=C(C(=C1Br)N)Br)F)F	CC1=C(C=NC=C1Br)Br
-6.041214	-1.9895982	3.0371478	4.0516157	1.014468	C1=C(C=C2C(=C1Br)C=NN2)Br	C1=CC2=C(C=CC(=N2)Br)C=C1Br
-7.1100144	-3.5359614	2.8463213	3.574053	0.7277317	C1(=C(C(=C(C(=C1Br)F)F)Br)F)F	C1(=C(C2=NSN=C2C(=C1F)Br)Br)F
-5.249693	-1.5875347	2.3756332	3.6621583	1.286525	C1=CSC(=C1Br)C2=C(C=CS2)Br	C1=C(C=C(N2C1=CN=C2)Br)Br
-7.1452904	-2.5077727	3.2188358	4.637518	1.4186821	CC1=C(C=CC(=C1[N+](=O)[O-])Br)Br	Fc1cc(Br)c(Br)cc1F
-5.9321127	-1.1454829	3.3164067	4.7866297	1.470223	C1=CC(=C(C=C1Br)Br)CC#N	C1=C2C(=CN=C1Br)C(=CN2)Br
-6.4955063	-2.1993468	2.9677408	4.2961597	1.328419	COC1=C(C=C(C=C1Br)C=O)Br	C1=C(C2=NC=NN2C=C1Br)Br
-6.445976	-2.794355	2.4081402	3.6516209	1.2434807	C1=C(C(=C(C(=C1Br)N)Br)F)F	C(=O)C1=C(N=C(S1)Br)Br
-6.7595935	-2.3241198	2.7902033	4.4354734	1.6452701	CCC1=CC(=CC(=C1)Br)Br	C1=C(C=C(C(=C1Br)C=O)F)Br
-6.5380073	-2.5958815	2.7600114	3.9421258	1.1821144	CC1=C(SC(=N1)Br)Br	C1=C(C(=NC=C1Br)Br)C#N
-5.9212666	-1.3354537	3.1815403	4.5858126	1.4042723	CC1=CC(=C(C=C1Br)Br)OC	CC1=NC(=C(C(=C1)Br)N)Br
-6.5622563	-2.3663967	3.0281794	4.19586	1.1676805	C1=C(C(=CC(=C1Cl)Br)Br)F	COC%41=CC=CC(C%42=NC(C(Br)=CC=C%43Br)=C%43N=C%42C%44=CC(OC)=CC=C%44)=C%41
-5.8217	-1.184115	3.1731536	4.637585	1.4644315	CN1C(=C(N=C1Br)C#N)Br	C1=CC(=C(C=C1Br)Br)N
-6.0842266	-1.2695341	3.2279525	4.8146925	1.58674	C1=C(C=C(C(=C1Br)F)Br)F	CC1=C(C=C2C(=CNC2=N1)Br)Br
-5.591683	-1.8818638	2.5623596	3.709819	1.1474595	C1=CC2=C(C=C1Br)C3=C(N2)C=CC(=C3)Br	C1=C(SC(=N1)Br)Br
-6.828656	-1.3948207	3.841835	5.4338355	1.5920005	C1=C(C=C(C(=C1Br)Cl)Br)Cl	CC1=C(C=NC=C1Br)Br
-5.7879577	-2.0208328	2.494058	3.767125	1.273067	COC1=C(C(=NC=C1Br)OC)Br	BrC%96=CC(C%97(SCCS%97)C%98=C%99SC(Br)=C%98)=C%99S%96
-5.9098935	-1.7106286	2.658341	4.199265	1.5409241	C1=C(C=NC2=C(C=NN21)Br)Br	Brc1ccccc1c2ccccc2Br
-6.1943316	-1.480325	3.3817248	4.7140064	1.3322816	CC1=CC(=C(C=C1Br)Br)OC	O=S(OC)(C1=CC(Br)=CC=C1C1=CC=C(Br)C=C1S(OC)(=O)=O)=O
-6.1799655	-1.3852141	3.3135662	4.794751	1.481185	C1=C(C=C(C=C1Br)Br)F	C1=C(C(=NC(=C1Br)Cl)N)Br
-6.252803	-1.6193757	3.219298	4.633427	1.4141293	C1=CC=C2C(=C1)C(=CC=C2Br)Br	C1=C(C=C(C=C1Br)Br)C#N
-6.0932283	-1.1096765	3.4122913	4.983552	1.5712607	CC1=C(C(=C(C=C1Br)Br)N)C	CC1=C(C=C(C(=C1Cl)Br)Cl)Br
-6.7166643	-1.9507383	3.2341783	4.765926	1.5317476	C1=CC=C(C=C1)CN2C(=NC(=N2)Br)Br	C1=C(N=C(C=N1)Br)Br
-6.288905	-2.4883997	2.529125	3.8005054	1.2713804	C1=C(C(=CC(=C1Br)F)Br)[N+](=O)[O-]	CCCCC1=C(SC(=C1)Br)Br
-5.7721844	-1.0362145	3.2622724	4.73597	1.4736977	C1=CC(=C(C=C1Br)F)Br	C1=CC(=C(C=C1Br)Br)N
-5.533154	-1.5003524	2.6399	4.0328016	1.3929017	C1COCCN1C2=CC(=CC(=C2)Br)Br	BrC1=C2C(OCCO2)=C(Br)S1
-6.6993713	-2.4077623	3.0075276	4.291609	1.2840812	CC1=CC(=C(C(=C1)Br)[N+](=O)[O-])Br	C1=CC=C(C=C1)C2=C(C=C(C=C2)Br)Br
-5.8687434	-1.1064793	3.3181868	4.7622643	1.4440775	C1=CC=C(C=C1)OC2=CC(=CC(=C2)Br)Br	CC1=C(SC(=C1Br)C)Br
-7.044154	-2.596403	2.8887346	4.447751	1.5590165	C1=CC(=NC(=C1C=O)Br)Br	O=C(O)c1cc(Br)cc(Br)c1
-7.1673594	-2.5927234	3.172647	4.574636	1.401989	C1=CC(=NC=C1Br)Br	CN1C(=C(C(=N1)Br)[N+](=O)[O-])Br
-5.808813	-1.6391947	3.006985	4.1696186	1.1626337	C1=CC2=CC(=CC3=C2C4=C(C=C3)C=C(C=C41)Br)Br	Cc1ccc(Br)c(Br)c1
-6.299855	-1.578872	3.2884517	4.7209835	1.4325318	C1=CC(=NC=C1Br)C2=NC=C(C=C2)Br	O=C1C(Br)C2=CC=C(Br)C=C2N1C
-5.9481325	-1.7146633	3.0389721	4.233469	1.1944969	C1=C(C=NC(=N1)Br)Br	C1=C(C=C2C(=C1Br)N=C(S2)N)Br
-5.723652	-2.3295345	2.2549243	3.3941174	1.139193	C1=C2C(=CN=C1Br)C(=CN2)Br	O=C1NC(C2=CC3=C(Br)SC(Br)=C3C=C21)=O
-5.4591727	-1.1165121	2.8627005	4.342661	1.4799604	C1=CC(=C(C=C1Br)F)Br	BrC%53=CC=C%54C(N(C)C%55=C%54N(C)C%56=CC(Br)=CC=C%55%56)=C%53
-6.0351906	-2.1919208	2.71371	3.8432698	1.1295598	C1=C(C=C(C(=C1Br)C=O)Br)F	C1=CC(=C2C(=C1Br)C=CN2)Br
-5.9192495	-2.576014	2.309653	3.3432355	1.0335824	C1=CC2=C(N=C(C=C2C=C1Br)N)Br	BrC1=CC=C(Br)S1(=O)=O
-5.8489003	-1.8360915	2.5790658	4.012809	1.433743	CC(=S)NC1=C(C=CC(=C1)Br)Br	C1COCCC12C3=C(C=CC(=C3)Br)C4=C2C=C(C=C4)Br
-5.8906183	-1.6203663	3.1996546	4.270252	1.0705976	C1=C(C=C(C=C1Br)Br)F	C1=C(C=C(C(=C1Br)N)OC(F)(F)F)Br
-6.020739	-2.0225155	2.8843586	3.9982235	1.1138649	C1=CC(=C(C=C1OC(F)(F)F)Br)Br	BrC(S%19)=C(C)C%20=C%19C(SC%21=C%22SC(Br)=C%21C)=C%22S%20
-5.800134	-1.4186339	2.8936133	4.3815002	1.4878869	C1=C(C=C(C(=C1Br)N)C#N)Br	C1=CC(=NC(=C1Br)N)Br
-5.7594366	-2.2524762	2.3594444	3.5069604	1.147516	C1=CC(=C(C(=C1)Br)C#N)Br	BrC%61=C%62C(F)=CSC%62=C(Br)S%61
-6.171422	-2.7465677	2.3517869	3.4248543	1.0730674	C1=C(C=C(N=C1N)Br)Br	BrC1=C(N=C(C)C(C)=N2)C2=C(Br)C2=NC(C)=C(C)N=C12
-5.870987	-2.008961	2.7951412	3.862026	1.0668848	C1=CC2=C(C=C1Br)NC3=C2C=CC(=C3)Br	C1=CC(=C(C=C1Br)C=O)Br
-6.8660593	-2.3624659	3.03043	4.5035934	1.4731634	C1=C(C=C(C(=C1Br)Cl)OC(F)(F)F)Br	BrC%94=NC=CC(/C=C/Br)=N%94
-6.4549966	-2.9172282	1.9013281	3.5377684	1.6364403	C1=CC=C(C=C1)COC2=C(C=C(C=N2)Br)Br	C1=C(C=C2C(=C1Br)NC(=O)C2=O)Br
-5.73519	-1.0268142	3.16004	4.708376	1.548336	CC(=O)NC1=CC(=CC(=C1)Br)Br	C1COCCN1C2=CC(=CC(=C2)Br)Br
-6.3976045	-2.4781551	2.7991478	3.9194493	1.1203015	C1=CN=CC2=C1C(=CC(=N2)Br)Br	Brc1sc(Br)cc1
-5.7011695	-1.0918854	3.28709	4.609284	1.3221939	C1C2=C(C=CC(=C2)Br)C3=C1C=C(C=C3)Br	Oc1ccc(Br)cc1Br
-7.313383	-3.6127617	2.535081	3.7006214	1.1655405	BrC%63=C%64C(C(N(C)C%64=O)=O)=C(Br)C%65=C%63C(N(C)C%65=O)=O	Brc1cscc1Br
-6.221232	-2.3972955	2.6660686	3.8239365	1.1578679	C1=C(N=CC2=NNC(=C21)Br)Br	C1=C(C=NC(=N1)Br)Br
-6.7501903	-2.8266683	2.8053863	3.923522	1.1181357	C1=CC(=C2C=NC=CC2=C1Br)Br	C1=C(C(=CN=C1Br)Br)[N+](=O)[O-]
-6.4060183	-1.5847492	3.3458772	4.821269	1.4753919	C1=CC(=C(C(=C1Cl)Br)Cl)Br	C1=C(C=C2C(=C1Br)C=NN2)Br
-6.312282	-1.2450951	3.378662	5.067187	1.6885247	CC1=C(C=CN=C1Br)Br	C1=C(C(=C(C=N1)Br)N)Br
-6.335623	-1.2597659	3.4909112	5.075857	1.5849459	C1=CC(=C(C(=C1)Br)CN)Br	CC1=CC(=NC(=C1)Br)Br
-5.58484	-1.6194186	2.7023149	3.9654212	1.2631063	C1=C(C=C(N=C1Br)Br)Cl	BrC%53=CC=C%54C(N(C)C%55=C%54N(C)C%56=CC(Br)=CC=C%55%56)=C%53
-6.2545056	-2.7089934	2.3339462	3.5455122	1.211566	C1=CC(=NC(=C1Br)Cl)Br	CN%66C(C%67=CC%68=C(Br)SC(Br)=C%68C=C%67C%66=O)=O
-6.3863554	-1.6184976	3.2893367	4.7678576	1.4785209	CC(C)C1=C(C=CC(=C1)Br)Br	COC(=O)C1=C(NC(=N1)Br)Br
-6.7373857	-3.6015596	2.1629577	3.135826	0.97286844	C1(=C(N=C(N1)Br)[N+](=O)[O-])Br	O=C(N1)C2=C3C(C4=C(Br)C=C3C1=O)=C(C1=C3C(C5=CC=C34)=C(C(NC5=O)=O)C=C1Br)C=C2
-5.809898	-1.7451843	2.7587798	4.0647135	1.3059337	CC1=CC(=CC(=C1F)Br)Br	Br/C=C/C%30=CC=C(Br)S%30
-6.593743	-2.1231937	3.283229	4.470549	1.18732	C1=C(C(=CC(=C1Br)Cl)Br)F	C1=CC2=CC(=CN=C2C3=NC=C(C=C31)Br)Br
-5.9055095	-1.099653	3.2427037	4.8058567	1.563153	C1=C(C(=C(C(=C1Br)F)Br)N)F	C1=CC2=C(C=C1Br)C(=CO2)Br
-5.890973	-1.6255196	3.2449722	4.2654533	1.0204811	C1=C(C=C(C(=C1Br)N)OC(F)(F)F)Br	CC1=C(C(=CC(=C1F)Br)Br)N
-5.751019	-1.6779246	2.8333433	4.0730944	1.2397511	C1=CC2=CC(=CC3=C2C4=C(C=C3)C=C(C=C41)Br)Br	C1=C(C=C(N=C1N)Br)Br
-6.2743783	-2.7047148	2.4864728	3.5696635	1.0831907	C1=C(C=C(C(=C1Br)N)C(F)(F)F)Br	C1=C(C(=CN=C1Br)Br)[N+](=O)[O-]
-5.7759304	-1.9736338	2.7466073	3.8022966	1.0556893	C1=CC2=C(C(=C1)Br)SC3=C2C=CC=C3Br	CC(C)(C)c1cc2ccc3c(Br)cc(Br)c4ccc(c1)c2c34
-6.236404	-2.7202666	2.4523194	3.5161374	1.063818	C1=CC2=C(C=C1Br)C3=CC(=CC(=C3N2)[N+](=O)[O-])Br	O=C%59C%60=C(Br)SC(Br)=C%60C(N%59C)=O
-6.1794133	-2.5402164	2.5493295	3.6391969	1.0898674	C1=CC2=C(C=C1Br)C3=CC(=CC(=C3N2)[N+](=O)[O-])Br	BrC1=NC2=CC=C(Br)C=C2O1
-6.1900587	-1.4875286	3.3979762	4.70253	1.3045537	CC1=CC(=C(C=C1Br)Br)C	BrC1=CC=C(C(C=CC(Br)=C2)=C2B2C3=CC=CC=C3)C2=C1
-7.1013036	-2.81328	2.9631383	4.2880235	1.3248851	C1(=C(C(=C(C(=C1F)F)Br)F)F)C2=C(C(=C(C(=C2F)F)Br)F)F	C1=CN=C(C2=C1N=C(S2)Br)Br
-6.130228	-2.4616966	2.4644365	3.6685314	1.2040949	C1=C(C=C(C(=C1Br)F)Br)[N+](=O)[O-]	CCCCC1=C(SC(=C1)Br)Br
-6.4094934	-2.2449186	2.9124026	4.1645746	1.252172	C1=CC(=C(C=C1Br)F)Br	C1=C(N2C=C(N=C(C2=N1)Br)Br)Cl
-6.195398	-1.4785948	3.2289171	4.716803	1.487886	C1=C(C=C2C=NNC2=C1Br)Br	C1=C(C=C(C(=C1Br)F)Br)F
-6.181706	-1.5436181	3.3684797	4.6380877	1.269608	C1=CC=C(C=C1)OC2=CC(=CC(=C2)Br)Br	Brc2cccc(c1cccc(Br)n1)n2
-6.90933	-1.9442879	3.5610287	4.965042	1.4040134	C1=C(C=C(C=C1Br)Br)CC(F)(F)F	C1=C(C(=C(C=N1)Br)C#N)Br
-5.6276646	-1.6108321	2.6742203	4.0168324	1.342612	CC1=C(C(=CC(=C1F)Br)Br)N	C1=C(SC(=N1)Br)Br
-7.0540924	-2.4204373	3.194584	4.633655	1.4390712	C1=C(C=C(C=C1Br)Br)C(F)(F)F	CC1=CC(=C(C(=C1)Br)[N+](=O)[O-])Br
-7.2657633	-2.4832466	3.302607	4.7825165	1.4799094	C1=C(C(=CN=C1Br)Br)F	C1=CN=C(C(=C1Br)C#N)Br
-5.9841576	-1.8848718	2.8268821	4.0992856	1.2724035	C1=CC(=C(C=C1OC(F)(F)F)Br)Br	C1=C(SC2=C1SC(=C2)Br)Br
-5.8436522	-1.2771051	3.1135092	4.5665474	1.4530382	C1=CC2=C(C=C1Br)C3=C(N2)C=CC(=C3)Br	COCN1C(=NC(=N1)Br)Br
-6.17236	-1.4790728	3.6274786	4.693287	1.0658083	BrC(C=C1)=CC2=C1C(C1=CC=CC=C1C(OC)=O)C(C=CC(Br)=C1)=C1O2	Brc1ccccc1c2ccccc2Br
-6.753121	-2.525585	2.7209537	4.227536	1.5065825	CC(C)C1=CC(=CC(=C1Cl)Br)Br	C1=C(C(=CN=C1Br)Br)C=O
-6.152421	-1.2243941	3.2650137	4.928027	1.6630135	C1=C(C=C(C=C1Br)Br)F	C1=C(C(=C(C=N1)Br)N)Br
-5.7859583	-2.233167	2.3752117	3.5527914	1.1775796	C1=CC(=C(C=C1Br)N)Br	O=C1NC(C2=CC3=C(Br)SC(Br)=C3C=C21)=O
-7.073137	-3.3427057	2.5888062	3.730431	1.1416249	C1=C(C=C(C(=C1Br)Cl)Br)F	CN(C9=O)C(C%10=C(Br)C=C%11C%12=C(C(N(C)C%11=O)=O)C(Br)=CC9=C%12%10)=O
-6.912259	-1.9928248	3.5107405	4.9194345	1.408694	C1=C(C=C(C(=C1Br)C#N)F)Br	CC1=CC(=CC(=C1F)Br)Br
-5.570073	-2.0564373	2.5320368	3.5136359	0.9815991	C1=C(SC2=C1SC(=C2)Br)Br	CC(C)(C)c1cc2ccc3c(Br)cc(Br)c4ccc(c1)c2c34
-6.084229	-1.6815765	3.1663804	4.4026527	1.2362723	CC1=NC(=C(C=C1Br)Br)N	C1=CC2=NC=CC(=C2C=C1Br)Br
-7.165533	-2.7641668	2.873926	4.401366	1.5274403	C1=CC2=CC(=C(N=C2N=C1)Br)Br	CN1C(=C(C(=N1)Br)[N+](=O)[O-])Br
-5.872697	-1.3805888	3.2277935	4.4921083	1.2643149	C1=CC(=C(C=C1Br)Br)N	C1=C(C=C(C(=C1Br)F)C#N)Br
-6.3193297	-2.855635	2.704323	3.4636948	0.75937176	COC1=C(C=C(C=C1Br)F)Br	C1=C(C2=NSN=C2C(=C1)Br)Br
-5.860468	-2.029536	2.5153573	3.830932	1.3155746	COC1=NC=C(C2=NNC(=C21)Br)Br	CC(=O)C1=CC(=CC(=C1N)Br)Br
-5.9672723	-2.5893607	2.1525474	3.3779116	1.2253642	C1=CC(=C(C=C1Br)Br)C(F)(F)F	BrC%23=C%24C(N=C(C%25=N%24)C%26=CC=CC%27=CC=CC%25=C%27%26)=C(Br)S%23
-5.9417467	-1.4327112	2.8336384	4.5090356	1.6753972	CC1=C(C=C(C(=O)N1C)Br)Br	Brc1cncc(Br)c1
-6.2957077	-1.6350838	3.212464	4.660624	1.4481599	C1=C(C=C(C(=C1Br)F)C#N)Br	CN1C(=CN=C1Br)Br
-6.8613925	-2.210656	3.2648935	4.650737	1.3858433	C1=C(C(=C(C(=C1F)Br)F)Br)F	Brc1ccc(cc1)C(=O)c2ccc(Br)cc2
-6.6664677	-2.920303	2.0392706	3.7461646	1.7068939	C1=C(C(=NC=C1Br)Br)F	C1=C(C=C2C(=C1Br)NC(=O)C2=O)Br
-6.196778	-1.5395019	3.1563556	4.657276	1.5009205	CC1=CC(=C(C(=C1Cl)Br)N)Br	N#CCS(=O)(C1=CC(Br)=CC=C1Br)=O
-6.350136	-1.8379216	3.0997922	4.512214	1.412422	CC1=CC(=CC(=C1F)Br)Br	CC1=CN2C=C(N=C(C2=N1)Br)Br
-6.603799	-1.4417714	3.6452193	5.1620274	1.516808	C1=C(C=C(C(=C1Br)F)F)Br	C1=CC=C(C(=C1)Br)Br
-6.131464	-2.3158157	2.5956604	3.8156483	1.2199879	C1=C(C=C(C(=C1Br)C=O)Br)F	C1=CC2=NC=C(N2C=C1Br)Br
-6.123251	-1.2953448	3.3787923	4.827906	1.4491138	COC1=C(C=C(C=C1Br)F)Br	Brc3ccc(c2ccc(c1ccc(Br)cc1)cc2)cc3
-6.287257	-2.4424503	2.6062655	3.844807	1.2385414	CC1=CC(=C(C=C1Br)[N+](=O)[O-])Br	CN1C=C(C=C(C1=O)Br)Br
-6.230966	-1.1680193	3.7643018	5.062947	1.298645	C1=CC=C(C=C1)C2=C(C=C(C=C2)Br)Br	C1=CC=C(C=C1)C2=C(C=C(C=C2)Br)Br
-5.813952	-3.0861745	1.8739105	2.7277775	0.85386693	FC%71=NC%72C(Br)=CC=C(Br)C%72N=C%71F	O=C1N(C)C2=CC(Br)=CC=C2/C1=C1C2=CC=C(Br)C=C2N(C)C/1=O
-6.426855	-1.5808558	3.1936743	4.8459992	1.6523249	C1C2=CC(=CC(=C2NC1=O)Br)Br	C1CCOC(C1)N2C(=NC(=N2)Br)Br
-5.900092	-1.4806126	2.9597244	4.4194794	1.459755	C1=CC(=C(C=C1Br)Br)F	C1=C(SC2=C1SC(=C2)Br)Br
-5.837835	-1.909864	2.479121	3.927971	1.4488499	CN=[N+](C1=CC(=CC(=C1N)Br)Br)[O-]	C1=C2C(=C(C(=C1Br)N)Br)N=CN2
-6.5796533	-2.5331995	2.8049214	4.0464535	1.2415321	C1=CC=C2C(=C1)C(=CC=C2Br)Br	C1=C(C(=CN=C1Br)C=O)Br
-5.9505954	-2.3684464	2.296495	3.582149	1.2856541	C1=CC=C(C=C1)C(=S)NC2=C(C=CC(=C2)Br)Br	BrC#CC#CBr
-6.0167794	-2.1903872	2.35905	3.8263922	1.4673421	C1=C(C=C(C=C1Br)Br)OC(F)F	C1=CC=C(C=C1)C(=S)NC2=C(C=CC(=C2)Br)Br
-6.737728	-2.3862646	3.2809649	4.3514633	1.0704985	CCC1=CC(=CC(=C1Br)CC)Br	CC1=CC(=C(C(=C1[N+](=O)[O-])Br)I)Br
-6.2700186	-2.6079264	2.3633149	3.6620922	1.2987773	C1CC(=O)NC2=C(C=C(C=C21)Br)Br	O=S1(=O)C(Br)=CC=C1Br
-6.821456	-2.9534636	3.114042	3.8679924	0.75395036	C1=C2C(=CC(=C1Br)Br)C(=O)OC2=O	COC%48(OC)C%49=C(C=CC(Br)=C%49)C%50=C%48C=C(Br)C=C%50
-6.4384036	-2.281393	2.943837	4.1570106	1.2131736	CC1=CN2C=C(N=C(C2=N1)Br)Br	Brc1ccc(cc1)C(=O)c2ccc(Br)cc2
-6.167832	-2.3093994	2.4855094	3.8584325	1.3729231	CC1=C(C(=CC(=C1[N+](=O)[O-])Br)Br)N	COC1=CC(=C(C=C1Br)Br)F
-5.8402534	-1.7055165	2.9554923	4.134737	1.1792448	C1=CC2=C(C=C1Br)S(=O)(=O)C3=C2C=CC(=C3)Br	COC1=CC(=C(C(=C1)Br)N)Br
-6.3232946	-2.2950022	2.8088698	4.0282927	1.2194228	C1=C(C(=CC(=C1Br)[N+](=O)[O-])Br)N	CC1=CC(=NC(=C1)Br)Br
-6.2269473	-1.8794389	3.0871792	4.3475084	1.2603292	C1=CSC(=C1Br)C2=C(C=CS2)Br	C1=C(C(=C(C=N1)Br)Cl)Br
-6.2225003	-1.7463478	2.9508462	4.4761524	1.5253062	C1=CSC(=C1Br)C2=C(C=CS2)Br	COCN1C(=NC(=N1)Br)Br
-6.6378136	-1.1635498	3.711018	5.4742637	1.7632456	CC1=C(C=C(C=C1F)Br)Br	CC1=CC(=C(C(=C1)Br)F)Br
-6.1405487	-2.2127566	2.6236749	3.927792	1.3041172	C1=C(C2=NNC(=C2C=N1)Br)Br	C1=CC=C(C(=C1)Br)Br
-6.190567	-2.305637	2.6061363	3.8849301	1.2787938	C1=C(C=NC(=N1)Br)Br	C1=C(C(=NC=C1Br)Br)N
-6.8897786	-1.9480907	3.5005095	4.941688	1.4411786	C1=CC(=C(C(=C1)Br)C(F)(F)F)Br	C1=C(C(=CN=C1Br)Br)F
-6.9866896	-1.7156799	3.6434703	5.2710094	1.6275392	C1=C(C=C(C(=C1Br)F)Cl)Br	O=C(O)c1cc(Br)cc(Br)c1
-6.074865	-1.5566905	2.753212	4.518174	1.7649622	CS(=O)(=O)C1=CC(=C(C(=C1)Br)N)Br	CN1C(=NC(=N1)Br)Br
-5.687331	-1.7701576	2.9229865	3.9171736	0.9941871	CC1=CC(=C(C(=C1Br)C)Br)N	CC(C)(C)c1cc2ccc3c(Br)cc(Br)c4ccc(c1)c2c34
-6.124416	-1.2047808	3.3489552	4.919635	1.5706797	C1=CC(=C(C=C1Br)Br)Cl	CC1=C(C=C2C(=CNC2=N1)Br)Br
-6.7749662	-2.7152627	2.9525132	4.059704	1.1071906	CCC1=CC(=CC(=C1Cl)Br)Br	C1=C2C=C(C=NC2=C(C=C1[N+](=O)[O-])Br)Br
-5.2259817	-1.9440402	2.1442325	3.2819414	1.1377089	BrC1=C2OC(C)C(C)OC2=C(Br)S1	Br/C=C/Br
-6.4023924	-2.358528	2.7652256	4.0438643	1.2786386	C1=C2C(=CNC2=NC=C1Br)Br	CN1C(=C(C(=N1)Br)[N+](=O)[O-])Br
-6.2191067	-2.0028372	2.8312588	4.2162695	1.3850107	CC1=NC(=C(C(=C1)Br)N)Br	O=S(OC)(C1=CC(Br)=CC=C1Br)=O
-6.151023	-2.3812258	2.5275214	3.769797	1.2422757	C1=C(C2=NC=C(N2N=C1Cl)Br)Br	CC(C)(C)N=[N+](C1=CC(=CC(=C1N)Br)Br)[O-]
-5.276724	-2.058124	2.1689637	3.2185998	1.0496361	BrC%96=CC(C%97(SCCS%97)C%98=C%99SC(Br)=C%98)=C%99S%96	Brc1ccccc1c2ccccc2Br
-5.7360806	-2.8266833	2.0006297	2.9093974	0.9087677	BrC1=C(N=C(C)C(C)=N2)C2=C(Br)C2=NC(C)=C(C)N=C12	Brc1sc(Br)cc1
-5.848405	-1.8186784	2.714481	4.0297265	1.3152454	CC1=CN2C=C(N=C(C2=N1)Br)Br	Brc1sc(Br)cc1
-5.597533	-2.7312462	1.981671	2.866287	0.884616	BrC(S6)=CC7=C6C(SC(Br)=C8)=C8S7	O=C%59C%60=C(Br)SC(Br)=C%60C(N%59C)=O
-6.183985	-1.2709639	3.437717	4.913021	1.4753041	BrCc1ccc(CBr)cc1	Brc3ccc(N(c1ccccc1)c2ccc(Br)cc2)cc3
-5.88287	-1.1601093	3.2179742	4.722761	1.504787	CC1=CC(=C(C(=C1C)Br)N)Br	CC1=C(C=NC=C1Br)Br
-6.4026036	-2.0106902	2.8742337	4.3919134	1.5176797	CC(C)OC1=C(C=C(C=C1C=O)Br)Br	Brc1ccc(cc1)c2ccc(Br)cc2
-6.0681725	-1.7968141	3.1602404	4.2713585	1.1111181	C1=C(C=C(C(=C1Br)N)Br)OC(F)F	C1=CC(=C(C=C1OC(F)(F)F)Br)Br
-6.9160137	-2.5704076	2.8024726	4.345606	1.5431333	C1=C(C(=CC(=C1Br)Cl)Br)F	C1(=C(N=C(N1)Br)[N+](=O)[O-])Br
-6.5116763	-2.4192655	3.0424728	4.092411	1.0499382	CC1=C(C=CC(=C1[N+](=O)[O-])Br)Br	C1=C(C(=C(C(=N1)N)Br)C(F)(F)F)Br
-5.861271	-1.3496398	3.0297694	4.511631	1.4818616	C1=CC(=C(C=C1Br)Br)C(F)(F)F	C1CCN(CC1)C2=CC(=CC(=C2)Br)Br
-7.25702	-2.8833752	2.7939904	4.373645	1.5796545	CC1=C(C=C(C(=C1Cl)Br)Cl)Br	C1=C(C=NC(=C1Br)[N+](=O)[O-])Br
-6.3079267	-2.194666	2.806267	4.1132607	1.3069937	C1=CN=C2C=C(C=NC2=C1Br)Br	CC1=C(C(=NC=C1Br)N)Br
-7.7568855	-4.158278	2.6117158	3.5986075	0.98689175	C1=C(C=C(C=C1Br)Br)C(F)F	C12=C(C(=C3C(=C1Br)C(=O)OC3=O)Br)C(=O)OC2=O
-6.2961273	-1.4266307	3.4479585	4.8694963	1.4215379	CC1=CC(=CC(=C1Br)C)Br	C1=CC(=NC=C1Br)C2=NC=C(C=C2)Br
-6.218079	-2.7481875	1.9903098	3.4698915	1.4795817	C1=C(C=C2C(=C1Br)C(=O)C(=O)N2)Br	C1=C2C(=CN=C1Br)C(=CN2)Br
-7.009465	-2.5409517	3.007962	4.4685135	1.4605515	C1=CC(=C(C=C1Br)Br)Cl	C1=CC(=C(C=C1Br)Br)[N+](=O)[O-]
-5.4661913	-1.2614629	2.8511822	4.204728	1.3535459	C1=CSC(=C1Br)C2=C(C=CS2)Br	CC1=C(N=C(N1C)Br)Br
-6.0697126	-2.2828534	2.6116583	3.7868593	1.1752009	C1=C(C=C(C(=C1Br)N)C#N)Br	O=C(Br)C%78=CC(S%79)=C(S%78)C%80=C%79C=C(C(SC(C(Br)=O)=C%81)=C%81S%82)C%82=C%80
-6.375454	-2.5586343	3.0356605	3.8168197	0.78115916	C1C2=CC(=CC(=C2NC1=O)Br)Br	BrC(C=N1)=CC2=C1C(N=CC(Br)=C1)=C1C1=NSN=C21
-5.562954	-2.0506027	2.4203887	3.5123513	1.0919626	C1=CC2=C(C=CN=C2C=C1Br)Br	COC%31=C%32C(C=C(Br)S%32)=C(OC)C%33=C%31C=C(Br)S%33
-6.2989864	-2.2458239	2.6362066	4.0531626	1.416956	C1=C(C=C(C(=C1Br)Cl)Br)Cl	CC(C)(C)N=[N+](C1=CC(=CC(=C1N)Br)Br)[O-]
-6.8498216	-2.7915294	2.817152	4.0582924	1.2411404	C1=C(C=C(C(=C1Br)F)Cl)Br	C(=O)C1=C(N=C(S1)Br)Br
-5.572246	-1.093749	3.0445218	4.478497	1.4339752	C1=C(C=C(C=C1Br)Br)CC(F)(F)F	C1CCN(C1)C2=CC(=CC(=C2)Br)Br
-6.6931777	-1.2394361	3.793941	5.4537416	1.6598005	C1=C(C=C(C=C1Br)Br)C(F)F	CC1=C(C(=NC(=C1Br)C)C)Br
-6.6115775	-2.7664788	2.8022735	3.8450987	1.0428252	C(=O)C1=C(N=C(S1)Br)Br	C1=CC2=C(C=C(C=C2N=C1)Br)Br
-5.7217493	-0.9959786	3.2462897	4.725771	1.4794812	C1=CC(=C(C=C1Br)CC#N)Br	COC1=CC(=CC(=C1N)Br)Br
-6.066972	-1.5483812	3.0634634	4.5185905	1.455127	CC1=CC(=C(C(=C1N)Br)F)Br	COC(=O)C1=C(NC(=N1)Br)Br
-6.470798	-2.4454925	2.6601086	4.0253057	1.3651972	CC(=O)NC1=C(C=CC(=C1)Br)Br	C1(=NN=C(S1)Br)Br
-6.6132774	-1.5763588	3.4968045	5.0369186	1.5401142	CC(C)C1=C(C=CC(=C1)Br)Br	COCN1C(=NC(=N1)Br)Br
-7.2710323	-2.7449932	3.0749826	4.526039	1.4510565	C1=CC(=C(C(=C1[N+](=O)[O-])Br)F)Br	C1=CN=C(C=C1Br)Br
-6.316918	-3.361478	2.5965872	2.9554398	0.35885262	C1=CC=C(C=C1)OC2=CC(=CC(=C2)Br)Br	C1=C(C2=NSN=C2C(=N1)Br)Br
-6.2098465	-1.4354949	3.1659558	4.7743516	1.6083958	C1=C(C=C(C(=C1Br)N)Br)OC(F)F	C1=C(C=C(C(=C1Br)Cl)Br)Cl
-6.1614585	-2.0110414	2.6125495	4.1504173	1.5378678	CC1=NC(=C(C(=C1)Br)N)Br	C1=C(C(=NC=C1Br)Br)C(F)(F)F
-6.409383	-1.267696	3.5739152	5.141687	1.5677717	CC1=CC(=CC(=C1Br)C)Br	COC1=CC(=NC(=C1)Br)Br
-5.8848205	-1.2818989	3.2277784	4.6029215	1.375143	C1=C(C(=C(C(=C1Br)F)Br)N)F	COc1cc(Br)c(Br)cc1OC
-5.5828085	-1.832166	2.7125514	3.7506425	1.0380912	C1=C2C=C(SC2=CC3=C1SC(=C3)Br)Br	COC1=C(C(=CC(=N1)Br)Br)N
-6.13594	-2.218464	2.6144145	3.9174762	1.3030617	C1=C(C2=NNC(=C2C=N1)Br)Br	BrC1=NC2=CC=C(Br)C=C2O1
-6.221918	-2.1756966	2.8536148	4.0462217	1.1926069	C1=CN=C(C=C1Br)C2=NC=CC(=C2)Br	Br/C=C/Br
-6.7942934	-1.8149105	3.5864248	4.979383	1.3929582	C1=C(C=C(C(=C1Br)Cl)Cl)Br	CC1=CC(=NC=C1Br)Br
-5.714277	-1.6785898	2.6712756	4.035687	1.3644114	C1=C(C=C2C(=C1Br)C(=NN2)N)Br	C1=CC2=NC(=NN2C(=C1)Br)Br
-6.5103307	-2.5552347	2.6551733	3.955096	1.2999227	CC1=C(N(C(=N1)Br)C)Br	CC1=C(C(=NC=C1Br)Br)[N+](=O)[O-]
-6.602372	-1.6051848	3.5225673	4.9971876	1.4746203	C1(=C(C(=C(C(=C1Br)F)F)Br)F)F	C1=CC=C(C=C1)COC2=C(C=C(C=N2)Br)Br
-5.963833	-1.6759135	3.1504855	4.2879195	1.137434	C1=C2C(=CNC2=NC=C1Br)Br	BrC1=CC2=CC=C3C(N=CC(Br)=C3)=C2N=C1
-6.293133	-2.0503058	3.0642688	4.242827	1.1785581	C1=CC2=C(C=C1Br)N=C(S2)Br	C1=CC2=C(C=C1Br)N=C(S2)Br
-6.81382	-2.4341831	3.1761549	4.379637	1.2034819	CCC1=CC(=CC(=C1)Br)Br	BrC1=C(C#N)SC(Br)=C1C#N
-6.357917	-1.4368907	3.4394526	4.921026	1.4815736	CC(C)(C)C1=CC(=C(C(=C1)Br)Cl)Br	BrC1=CC=C2C3=CC=C(Br)C=C3OC2=C1
-5.827565	-1.7073122	2.8049538	4.120253	1.3152993	C1=CC(=C2C(=C1Br)C=CN2)Br	C1=C(C(=NC=C1Br)Br)F
-5.7518315	-2.0455885	2.5232148	3.706243	1.1830282	CC(=O)C1=CC(=CC(=C1)Br)Br	C1=C(SC2=C1SC3=C2SC(=C3)Br)Br
-6.323878	-2.557755	2.6705594	3.7661228	1.0955634	CC1=CC(=C(C=C1Br)[N+](=O)[O-])Br	COc1cc(Br)c(OC)cc1Br
-5.829235	-1.1174482	3.2946675	4.7117867	1.4171193	CCC1=CC(=C(C(=C1)Br)N)Br	C1=CC(=C(C(=C1N)Br)F)Br
-5.667913	-0.9459161	3.1398537	4.721997	1.5821431	C1CCN(CC1)C2=CC(=CC(=C2)Br)Br	CC1=C(C=NC=C1Br)Br
-6.8333187	-1.6052502	3.6811295	5.2280684	1.5469389	C1=C(C=C(C=C1Br)Br)C(F)(F)F	FC(F)Oc1cc(Br)c(Cl)c(Br)c1
-6.8922534	-2.4362402	3.0195842	4.456013	1.436429	C1=CN2C(=NC(=N2)Br)C=C1Br	C1=CC(=C(C(=C1)Br)[N+](=O)[O-])Br
-5.2016354	-2.4961834	1.8603368	2.705452	0.8451152	BrC1=CC(C2(OCCO2)C2=C3SC(Br)=C2)=C3S1	BrC1=CC(C2(OCCO2)C2=C3SC(Br)=C2)=C3S1
-6.801651	-1.9542584	3.2057602	4.8473926	1.6416323	CC1=C(C=CN=C1Br)Br	CC(=O)C1=CC(=CC(=C1)Br)Br
-6.64561	-2.6277971	2.6451592	4.0178127	1.3726535	C1=C(C(=C(N=C1Br)Br)[N+](=O)[O-])N	C1=C(C=C(N=C1N)Br)Br
-6.0759172	-2.35239	2.9937842	3.7235272	0.729743	C1=C2C(=CNC2=NC=C1Br)Br	BrC(C=N1)=CC2=C1C(N=CC(Br)=C1)=C1C1=NSN=C21
-6.081309	-1.2253994	3.4443521	4.8559093	1.4115572	CC1=C(C(=NC=C1Br)N)Br	BrCc1ccc(CBr)cc1
-6.841699	-2.11344	3.332634	4.728259	1.3956251	C1=CN=C(C=C1Br)C2=NC=CC(=C2)Br	BrC1=NOC(Br)=C1
-6.146553	-1.501216	3.3066638	4.645337	1.3386734	C1=C(C=C(C=C1Br)Br)CC#N	Brc3ccc(N(c1ccccc1)c2ccc(Br)cc2)cc3
-6.120914	-2.7232115	2.4757104	3.3977025	0.92199206	C1=C(C=C(N=C1Br)Br)C(F)(F)F	O=C(Br)C%78=CC(S%79)=C(S%78)C%80=C%79C=C(C(SC(C(Br)=O)=C%81)=C%81S%82)C%82=C%80
-7.0741224	-2.360955	3.4450605	4.713167	1.2681067	C1=CC(=C(C(=C1Br)F)Cl)Br	C1=C(C=C(C=C1Br)Br)C(=O)Cl
-5.8935456	-2.105797	2.680101	3.7877486	1.1076477	C1=CC2=C(C=C1Br)C3=C(N2)C=CC(=C3)Br	O=C%59C%60=C(Br)SC(Br)=C%60C(N%59C)=O
-5.6304135	-1.9522165	2.565037	3.678197	1.1131599	C1=CN2C(=CN=C(C2=N1)Br)Br	BrC%53=CC=C%54C(N(C)C%55=C%54N(C)C%56=CC(Br)=CC=C%55%56)=C%53
-5.7996635	-1.9107662	2.7423878	3.8888974	1.1465096	C1=CC(=C(C(=C1Br)F)F)Br	C1=CC2=C(N=C(C=C2C=C1Br)N)Br
-6.7900953	-3.4244127	2.7662053	3.3656826	0.5994773	C1=C(C2=NSN=C2C(=N1)Br)Br	N#CCS(=O)(C1=CC(Br)=CC=C1Br)=O
-6.536226	-3.557284	2.0952961	2.9789417	0.88364553	C1(=C(N=C(C(=N1)Cl)Br)Br)N	O=C(N1)C2=C3C(C4=C(Br)C=C3C1=O)=C(C1=C3C(C5=CC=C34)=C(C(NC5=O)=O)C=C1Br)C=C2
-6.100448	-1.8661765	3.0143661	4.2342715	1.2199054	C1C2=CC(=CC(=C2NC1=O)Br)Br	C1=CC=C2C(=C1)C=C(N=C2Br)Br
-5.978159	-1.5008227	3.0401046	4.4773364	1.4372318	C1=C(C(=CC(=C1Br)F)Br)N	C1=C(C(=CN=C1Br)Br)N
-6.480898	-1.8685102	3.3263562	4.6123877	1.2860315	COc1c(Br)cc(Cl)cc1Br	C1=CC(=NC(=C1Br)Cl)Br
-5.7648225	-3.0056384	2.1849008	2.7591841	0.57428336	C1=CC(=C(C=C1Br)N=C=S)Br	FC1=C(C2=CC(C)=C(Br)S2)C2=NSN=C2C(C2=CC(C)=C(Br)S2)=C1F
-6.398376	-2.361673	2.891827	4.036703	1.144876	C1=CC(=C(C=C1Br)Br)N=C=S	C1=C(C=NC(=N1)Br)Br
-5.643052	-1.0593902	3.0194588	4.583662	1.5642033	CCC1=CC(=CC(=C1)Br)Br	C1=CC2=NC=C(N2C=C1Br)Br
-6.2721906	-2.0361915	2.9400492	4.235999	1.2959499	C1=CN2C=C(N=C(C2=N1)Br)Br	Brc1cc(I)c(Br)cc1I
-6.33733	-1.5600368	3.167516	4.777293	1.6097772	CN1C(=NC(=N1)Br)Br	Brc3ccc(N(c1ccccc1)c2ccc(Br)cc2)cc3
-6.046402	-2.4843185	2.324041	3.5620835	1.2380426	C1=C(C=C(C(=C1Br)C=O)Br)F	BrC1=C2C(OCCO2)=C(Br)S1
-6.367519	-2.0993161	2.7211742	4.268203	1.5470285	CC(=O)C1=CC(=CC(=C1NC(=O)C)Br)Br	C1=CC(=C(C=C1Br)NN)Br
-6.874155	-2.0378785	3.477559	4.8362765	1.3587174	C1=CC(=C(C(=C1Br)F)Cl)Br	C1=C(C(=NC=C1Br)Br)F
-7.1522527	-2.5384202	3.167296	4.6138325	1.4465365	CC1=C(C=CC(=C1Cl)Br)Br	C1=C(C(=C(C(=C1F)Br)[N+](=O)[O-])Br)F
-6.2467566	-2.3131297	2.6953115	3.933627	1.2383153	CN1C=C(C=C(C1=O)Br)Br	C1=C(C=C(N=C1Br)Br)C=O
-5.813403	-3.537209	1.7894953	2.276194	0.48669875	BrC%34=CC%35=C(Br)SC=C%35S%34	BrC1=C([N+]([O-])=O)C([N+]([O-])=O)=C(Br)C2=NSN=C12
-7.0208464	-2.7816074	2.7562323	4.2392387	1.4830065	CC1=C(C=CC(=C1Cl)Br)Br	C1=C(C=NC(=C1Br)[N+](=O)[O-])Br
-6.3821206	-2.0111663	3.0983086	4.3709545	1.272646	C1=C(C=C(C=C1Br)Br)OC(F)F	C1=CC2=C(C=C1Br)N=C(S2)Br
-6.262735	-1.9261223	2.902312	4.3366127	1.4343007	C1=C(C(=NC=C1Br)Br)Cl	C1=C2C(=C(C(=C1Br)N)Br)OC(O2)(F)F
-6.7527666	-1.5677989	3.6851401	5.184968	1.4998279	CC1=CC(=C(C(=C1)Br)F)Br	O=S(OC)(C1=CC(Br)=CC=C1Br)=O
-6.398121	-1.1497282	3.6859174	5.2483926	1.5624752	C1=C(C=C(C=C1Br)Br)F	CCC1=C(C=CC(=C1)Br)Br
-6.2006445	-2.0311124	2.9460697	4.169532	1.2234621	C1=CC(=NC(=C1)Br)Br	C1=CC(=C2C=NC=CC2=C1Br)Br
-5.540457	-1.5609365	2.645524	3.9795203	1.3339963	C1=CC(=C2C(=C1Br)C=CN2)Br	BrC#CC#CBr
-6.593409	-1.5372813	3.5236187	5.0561275	1.5325089	CC1=NC(=CC(=C1)Br)Br	Brc1cccc(Br)c1
-6.13136	-2.2632189	2.8292835	3.8681412	1.0388577	CC1=CC(=C(C(=C1[N+](=O)[O-])Br)I)Br	CC1=CC(=C(C(=C1N)Br)F)Br
-6.7617064	-2.355362	3.1987433	4.4063444	1.2076011	Cc1cc(Br)cc(Br)c1[N+]#[C-]	BrC1=C(C#N)SC(Br)=C1C#N
-5.778247	-1.0930475	3.3225842	4.6851993	1.3626151	CC1=C(C=C(C=C1Br)N)Br	C1=C(C=C2C(=C1Br)N=C(S2)N)Br
-6.211974	-2.6619215	2.5256028	3.5500526	1.0244498	CC(=O)NC1=CC(=C(C=C1Br)[N+](=O)[O-])Br	CC1=CC(=C(C(=C1Br)C)Br)N
-5.862228	-2.353141	2.2682927	3.5090868	1.2407942	C1(=C(N=C(C(=N1)Cl)Br)Br)N	BrC1=C2OC(C)C(C)OC2=C(Br)S1
-6.4389935	-1.4710655	3.315589	4.967928	1.652339	C1=C(C(=C(C(=C1Br)N)Br)F)Cl	C1=C(C(=C(C(=N1)Cl)Br)N)Br
-6.2717347	-1.6902578	3.0580323	4.581477	1.5234449	C1=CC=C2C(=C1)C(=CC=C2Br)Br	C1(=NC(=NN1)Br)Br
-5.767293	-1.8558995	2.6331623	3.9113936	1.2782314	CN=[N+](C1=CC(=CC(=C1N)Br)Br)[O-]	C1=C(C=C2C(=C1Br)C(=NN2)N)Br
-6.1170673	-2.0175047	2.6284454	4.0995626	1.4711173	C1=CN2C=C(N=C(C2=N1)Br)Br	C1=C2C(=C(C(=C1Br)N)Br)OC(O2)(F)F
-6.843934	-1.3846357	3.824909	5.459298	1.6343892	C1=CC(=C(C=C1Br)Br)F	CC1=C(C(=NC=C1Br)Cl)Br
-5.9564953	-1.8806808	2.7444997	4.0758142	1.3313146	C1=CC2=C(C=C1Br)S(=O)(=O)C3=C2C=CC(=C3)Br	C1=C(C=NC2=C(C=NN21)Br)Br
-6.8075404	-2.2694013	2.8356538	4.5381393	1.7024856	CC(=O)C1=CC(=CC(=C1NC(=O)C)Br)Br	C1=C(C=C(C(=C1Br)F)C=O)Br
-6.2546277	-1.6699531	3.0384114	4.584675	1.5462635	C1=C(C=C(N=C1N)Br)Br	C1CCOC(C1)N2C(=NC(=N2)Br)Br
-6.491092	-2.0198352	3.1524203	4.471257	1.3188369	CN1C(=C(N=C1Br)C#N)Br	O=S(OC)(C1=CC(Br)=CC=C1Br)=O
-6.2484517	-2.39267	2.6794345	3.8557818	1.1763473	CC(=O)C1=C(SC(=C1)Br)Br	BrC1=CC=C(C(C=CC(Br)=C2)=C2B2C3=CC=CC=C3)C2=C1
-5.8822	-1.9013249	2.613997	3.980875	1.366878	C1=CC(=C(C=C1Br)C=O)Br	C1=C2C(=C(C(=C1Br)N)Br)N=CN2
-6.7001586	-2.0937984	3.1320837	4.6063604	1.4742768	C1=CC2=C(C=C1Br)N=C(S2)Br	CC1=C(C(=NC=C1Br)Cl)Br
-6.534255	-2.0840368	3.1299348	4.450218	1.3202834	CC1=C(C=CC(=C1F)Br)Br	C1=CC(=C2C(=C1Br)N=CC=N2)Br
-5.997358	-1.1475818	3.220438	4.8497763	1.6293383	C1=C(C(=C(C(=C1Br)Cl)Br)N)F	CN1C(=CN=C1Br)Br
-6.7094135	-2.782987	2.7049634	3.9264264	1.221463	C1=C(C(=CC(=C1Br)C=O)Br)C=O	C1=CC2=C(C3=C1C=CC(=N3)Br)N=C(C=C2)Br
-6.39858	-2.2969954	1.518837	4.1015844	2.5827475	C1=C(C=C(C(=C1Br)Cl)C(F)(F)F)Br	CS(=NC1=C(C=C(C=C1[N+](=O)[O-])Br)Br)(=O)C
-5.9078555	-1.7886202	3.1695957	4.119235	0.9496393	CN(CC1=CC(=CC(=C1N)Br)Br)C2CCCCC2	C1=C(C(=C(C(=N1)N)Br)C(F)(F)F)Br
-6.7565875	-2.5668652	3.080024	4.189722	1.109698	C1=C(C=C(C(=C1Br)N=C=S)OC(F)(F)F)Br	CC1=C(C=C(C=C1[N+](=O)[O-])Br)Br
-5.655355	-1.8614067	2.6467493	3.7939482	1.1471989	C1=CC(=C(C(=C1)Br)Cl)Br	BrC(S6)=CC7=C6C(SC(Br)=C8)=C8S7
-6.469477	-1.9879345	3.0182996	4.4815426	1.463243	CC1=C(C=C(C(=N1)C)Br)Br	Br/C=C/Br
-6.239109	-2.396037	2.4922001	3.843072	1.3508718	C1=C2C(=C(C(=C1Br)N)Br)OC(O2)(F)F	C1=C(N2C(=NC=N2)C(=N1)Br)Br
-5.7245836	-0.9347924	3.2906919	4.789791	1.4990993	CC(C)C1=CC(=CC(=C1N)Br)Br	CC1=C(C=C(C=C1Br)OC)Br
-5.9000688	-2.3718843	2.487061	3.5281844	1.0411234	C1=CNC2=C1C(=NC=C2Br)Br	CC1=NC2=C(N=C1C)C(Br)=CC=C2Br
-6.0330234	-2.6125913	2.1848764	3.420432	1.2355556	C1C2=C(C=CC(=C2)Br)C3=C1C=C(C=C3)Br	C1=C(C2=NON=C2C(=C1)Br)Br
-6.5335307	-2.6011543	2.7407818	3.9323764	1.1915946	CC(=O)NC1=CC(=C(C=C1Br)[N+](=O)[O-])Br	CC1=CC(=C(C=C1Br)Br)OC
-5.8683534	-2.1899834	2.5027838	3.67837	1.1755862	BrC1=C2OC(C)C(C)OC2=C(Br)S1	O=S3(=O)c1ccc(Br)cc1c2cc(Br)ccc23
-5.6842775	-1.2089517	3.1465592	4.4753256	1.3287663	C1=CC(=NC(=C1N)Br)Br	CC1=C(SC(=C1Br)C)Br
-5.8685393	-1.5159009	3.0849905	4.3526382	1.2676477	C1=C(C=C(C=C1Br)Br)C(F)(F)F	CCn3c1cc(Br)ccc1c2ccc(Br)cc23
-6.4447937	-1.3247771	3.4263442	5.1200166	1.6936724	CCOC1=C(C=C(C=C1Br)F)Br	C1=C(C(=C(C(=N1)Cl)Br)N)Br
-6.383768	-2.3019109	2.9148204	4.081857	1.1670368	COC1=C(C=CC(=C1)Br)Br	C1=CN=C(C2=C1N=C(S2)Br)Br
-5.6345406	-1.005766	3.1214068	4.6287746	1.5073678	C1CCN(CC1)C2=CC(=CC(=C2)Br)Br	Brc1ccccc1c2ccccc2Br
-6.648383	-2.601983	2.6723204	4.0464	1.3740797	O=c2c1cc(Br)ccc1c3ccc(Br)cc23	CC1=C(C(=NC=C1Br)C)Br
-6.074595	-2.0739722	2.6127346	4.0006227	1.3878882	C1(=C(N=C(N1)Br)Br)C(F)(F)F	C1=CC2=C(C=CC(=C2N=C1)Br)Br
-6.919533	-3.2063162	2.6118686	3.7132165	1.1013479	C1=C(C=C(C=C1Br)Br)CC#N	CN(C9=O)C(C%10=C(Br)C=C%11C%12=C(C(N(C)C%11=O)=O)C(Br)=CC9=C%12%10)=O
-5.9831667	-1.398736	3.1421711	4.5844307	1.4422596	CC1=CC(=C(C(=C1N)Br)F)Br	C1=CN=C(C=C1Br)C2=NC=CC(=C2)Br
-6.770937	-3.0204139	1.8591359	3.750523	1.8913872	C1=C(C(=CC(=C1Br)F)Br)F	C1=C(C=C2C(=C1Br)C(=O)C(=O)N2)Br
-6.427873	-2.3642411	2.7271445	4.063632	1.3364875	C1=C(C=C(C(=C1Br)C=O)Br)F	C1=C(C(=NC(=C1Br)Cl)N)Br
-6.238457	-1.6690683	3.3692088	4.569389	1.20018	C1=C(C=C(C(=C1Br)N)OC(F)(F)F)Br	CC1=C(C(=NC=C1Br)C)Br
-5.6178174	-1.721523	2.6300087	3.8962944	1.2662857	C1=CC2=C(C(=C1)Br)SC3=C2C=CC=C3Br	BrC1=C2OC(C)C(C)OC2=C(Br)S1
-6.084737	-1.4535446	3.300719	4.631192	1.3304732	COC1=C(C=C(C=C1Br)C(=NO)N)Br	C1=C(C(=NC(=C1Br)Cl)N)Br
-6.2555537	-1.9787891	2.967177	4.276765	1.309588	C1=C(C(=C(N=C1C(F)(F)F)Br)N)Br	CC%45(OC)C%46=C(C=CC(Br)=C%46)C%47=C%45C=C(Br)C=C%47
-6.8622665	-1.913944	3.5833483	4.9483223	1.364974	C1=C(C(=CC(=C1Cl)Br)Br)F	C1=CC(=NC(=C1Br)Cl)Br
-6.101708	-1.5368624	3.0465674	4.5648456	1.5182781	C1=C(C=C(C(=C1Br)Cl)Br)F	C1=CC(=NC(=C1N)Br)Br
-6.97594	-2.6454654	2.8329053	4.330475	1.4975696	C1=C(C=C(C(=C1Br)F)Br)Cl	C1=CC(=NC(=C1C=O)Br)Br
-5.708203	-3.0131025	2.1193824	2.6951003	0.5757179	CC(C)(C)C(=O)NC1=CC(=CC(=C1)Br)Br	FC1=C(C2=CC(C)=C(Br)S2)C2=NSN=C2C(C2=CC(C)=C(Br)S2)=C1F
-6.074522	-1.1611148	3.3840196	4.9134073	1.5293877	C1C2=CC(=CC(=C2NC1=O)Br)Br	Brc1ccc(cc1)c2ccc(Br)cc2
-6.462436	-0.8934915	3.891644	5.568945	1.6773009	CC1=CC(=C(C(=C1)Br)C)Br	C1=CC(=C(C=C1Br)CC#N)Br
-6.1585336	-2.0991004	2.8294158	4.059433	1.2300172	C1=CC(=C(C=C1Br)C=O)Br	C1=C(C(=NC=C1Br)Br)N
-6.380051	-1.0661464	3.825427	5.313905	1.4884777	CC1=CC(=C(C=C1Br)C)Br	Cc1ccc(Br)c(Br)c1
-5.9511614	-1.2007439	3.3059301	4.7504177	1.4444876	C1=C(C(=CC(=C1Cl)Br)Br)F	C1=CNC2=C(C=C(C=C21)Br)Br
-6.047237	-1.8644443	2.467665	4.1827927	1.7151277	C1(=C(C(=C(C(=C1F)Br)F)Br)F)F	CC(=O)C1=CC(=CC(=C1N)Br)Br
-6.397518	-1.6294713	3.5126836	4.768047	1.2553632	C1(=C(C(=C(C(=C1Br)F)F)Br)F)F	C1=CC=C(C=C1)OC2=CC(=CC(=C2)Br)Br
-6.0037293	-2.7229974	2.053846	3.280732	1.226886	O=C(C1=C(F)C2=C(Br)SC(Br)=C2S1)OC	Brc2cccc(c1cccc(Br)n1)n2
-6.316081	-2.0922842	2.9448538	4.223797	1.2789431	C1=C(C=C(C(=C1Br)F)C=O)Br	C1=CC2=C(C=C1Br)SC3=C2C=CC(=C3)Br
-5.781992	-2.2452247	2.5862944	3.5367672	0.95047283	C1=C(C=C(C(=C1Br)C=O)F)Br	BrC%83=CC(SC%84=CC(Br)=CC%85=C%84N%86C=C%85)=C%86C=C%83
-6.878135	-1.8677446	3.4159112	5.0103908	1.5944796	COCN1C(=NC(=N1)Br)Br	Brc1cncc(Br)c1
-6.5219893	-2.1779678	3.158662	4.344022	1.1853597	C1=CC2=C(C=CN=C2C=C1Br)Br	Brc2cccc(c1cccc(Br)n1)n2
-6.154517	-3.36406	2.1281204	2.7904572	0.6623368	CC1=C(SC(=N1)Br)Br	C1=C(C2=NSN=C2C(=C1F)Br)Br
-6.314216	-1.9296856	2.9412117	4.3845305	1.4433188	CC1=C(N=C(C(=N1)N)Br)Br	C1=CN=C(C=C1Br)Br
-6.1390986	-2.435536	2.7110684	3.7035627	0.99249434	C1=C(C(=CN=C1Br)Br)C=O	CCn3c1cc(Br)ccc1c2ccc(Br)cc23
-5.8115754	-1.041724	3.4137466	4.7698517	1.3561051	CC1=CC(=C(C(=C1Br)C)Br)N	CC1=NC(=C(C=C1Br)Br)N
-6.772568	-1.585954	3.6325984	5.186614	1.5540156	CCC1=C(C=C(C=N1)Br)Br	C1=CN=C(C=C1Br)Br
-6.166959	-2.419772	2.5105884	3.747187	1.2365985	CC(C)(C)C1=CC(=C(C(=C1)Br)N)Br	C1=CC(=C(C=C1Br)Br)[N+](=O)[O-]
-6.0746717	-1.4821593	3.1321683	4.5925126	1.4603443	CC1=C(C(=NC=C1Br)N)Br	C1=C2C(=C(C(=C1Br)N)Br)OC(O2)(F)F
-6.679649	-2.3225667	3.1574154	4.3570824	1.199667	C1=CC2=C(C=C(C=C2N=C1)Br)Br	C1=C(C(=NC=C1Br)Br)C#N
-5.6015787	-1.4599283	2.790364	4.14165	1.3512862	CC1=CC(=CC(=C1Br)C)Br	COC%31=C%32C(C=C(Br)S%32)=C(OC)C%33=C%31C=C(Br)S%33
-6.3687196	-1.507972	3.4313803	4.8607473	1.4293671	COC1=C(C(=NC=C1Br)OC)Br	BrC1=CC=C2C3=CC=C(Br)C=C3OC2=C1
-6.6238728	-2.0656335	2.933356	4.558239	1.6248829	C1COC2=CC(=CC(=C2C1=O)Br)Br	CCOC1=C(C=C(C=C1Br)F)Br
-7.136448	-2.5893333	3.0755484	4.5471144	1.471566	CC1=CC(=C(C(=C1)Br)[N+](=O)[O-])Br	C1=C(C=C(N=C1Br)Br)C(F)(F)F
-6.6660447	-2.4316025	2.8787549	4.234442	1.3556874	CC1=C(N=C(S1)Br)Br	C1=CN=C(C(=C1Br)C#N)Br
-6.4383993	-2.367909	2.7098565	4.0704904	1.3606339	CN1C(=NC(=N1)Br)Br	FC%71=NC%72C(Br)=CC=C(Br)C%72N=C%71F
-5.4778543	-2.4513426	2.1016595	3.0265117	0.92485213	BrC(S6)=CC7=C6C(SC(Br)=C8)=C8S7	CC1=NC2=C(N=C1C)C(Br)=CC=C2Br
-5.167898	-0.94684696	2.81434	4.221051	1.4067111	C1=CC2=C(C=C1Br)C3=C(N2)C=CC(=C3)Br	BrC%83=CC(SC%84=CC(Br)=CC%85=C%84N%86C=C%85)=C%86C=C%83
-5.736133	-2.4881864	2.3208003	3.2479467	0.92714643	C1=CC2=NC(=NC=C2C=C1Br)Br	BrC(S%13)=CC%14=C%13C(SC(Br)=C%15)=C%15C%14(C)C
-5.8092017	-1.475508	2.9847503	4.3336935	1.3489432	C1=C(C(=C(C(=C1Br)F)Br)N)Cl	BrC(S%19)=C(C)C%20=C%19C(SC%21=C%22SC(Br)=C%21C)=C%22S%20
-6.3943644	-2.4184315	2.682198	3.9759328	1.2937348	C1=C(C=NC2=NNC(=C21)Br)Br	C1=CN2C(=N1)C(=CC(=N2)Br)Br
-6.763045	-3.063099	2.4271526	3.699946	1.2727933	C1=C(C2=NC=C(N2N=C1Cl)Br)Br	C12=C(SC(=C1C(=O)OC2=O)Br)Br
-6.020785	-1.9078181	3.0039277	4.1129665	1.1090388	CC1=C(N=C(S1)Br)Br	COC%48(OC)C%49=C(C=CC(Br)=C%49)C%50=C%48C=C(Br)C=C%50
-6.2136164	-1.4200463	3.307862	4.79357	1.485708	CCC1=C(C=C(C=N1)Br)Br	Brc1sccc1Br
-6.38272	-2.305537	2.6665294	4.077183	1.4106534	C1=C(C(=C(C(=C1Br)N)Br)Cl)F	C1=CC(=C(C(=C1Br)C=O)F)Br
-5.7396054	-1.7044013	3.0607824	4.035204	0.9744215	C1=CC(=C2C(=C1Br)N=C(S2)Cl)Br	C1=CC2=C(C=C1Br)C3=C(N2)C=CC(=C3)Br
-6.0615263	-1.4616895	3.13885	4.599837	1.4609869	CC1=CC(=C(C(=C1N)Br)Cl)Br	C1=CC(=NC(=C1F)Br)Br
-6.221166	-2.233662	1.5372566	3.9875042	2.4502478	C1=CC(=C(C(=C1Br)F)F)Br	CS(=NC1=C(C=C(C=C1[N+](=O)[O-])Br)Br)(=O)C
-6.1199055	-1.865346	2.8806186	4.2545595	1.373941	C1=CC2=C(C(=C1)Br)SC3=C2C=CC=C3Br	BrC%87=C%88C(SC(Br)=C%88)=NC%89=C%87C(F)=C(F)S%89
-5.702812	-1.2346351	3.01244	4.468177	1.4557369	C1COCCN1C2=CC(=CC(=C2)Br)Br	CC1=CC(=C(N=C1Br)Br)C
-6.1325693	-1.1259055	3.5135417	5.006664	1.4931221	CC1=C(C=CC(=C1C)Br)Br	C1=CC2=C(C=CC(=C2)Br)C=C1Br
-5.735661	-3.6061182	1.629909	2.1295428	0.4996338	BrC1=CC(C2(OCCO2)C2=C3SC(Br)=C2)=C3S1	BrC1=C([N+]([O-])=O)C([N+]([O-])=O)=C(Br)C2=NSN=C12
-5.9844275	-2.3087025	2.3026752	3.675725	1.3730497	C1=CC=C(C=C1)C(=S)NC2=C(C=CC(=C2)Br)Br	CC1=C(N=C(S1)Br)Br
-6.445753	-2.8172536	2.8850574	3.6284995	0.74344206	CC1(C2=CC(=CC(=C2NC1=O)Br)Br)C	C1(=C(C2=NSN=C2C(=C1F)Br)Br)F
-6.4774837	-3.0323637	2.035327	3.44512	1.4097931	C1=CC2=C(C=C1Br)C(=O)C(=O)C3=C2C=CC(=C3)Br	C1=CC(=CC2=C1C=CC(=N2)Br)Br
-5.8677883	-1.4881303	3.1158094	4.3796577	1.2638483	C1=C(C=C2C=NNC2=C1Br)Br	C1=CC2=C(C=C1Br)SC3=C2C=CC(=C3)Br
-6.353779	-1.6006182	3.373434	4.7531605	1.3797264	C1=CC(=C(C=C1Br)C#N)Br	BrC1=CC=C(OC2=CC=C(Br)C=C22)C2=C1
-6.4113235	-1.9504642	3.157538	4.4608593	1.3033214	Cc3ccc(c2ccc1cc(Br)cc(Br)c1n2)cc3	C1=CC(=C(C(=C1F)Br)F)Br
-5.5171485	-1.5012753	2.778195	4.015873	1.237678	COC1=CC(=C(C=C1Br)Br)OC	CCCCC1=C(SC(=C1)Br)Br
-7.409547	-2.7923717	3.0601563	4.617175	1.5570188	CC1=CC(=C(C(=C1)Br)[N+]#[C-])Br	C1=CN=C(C(=C1Br)[N+](=O)[O-])Br
-5.9973927	-1.4722216	2.9208505	4.5251713	1.6043208	C1=CC(=C(C=C1Br)Br)F	BrC%69=C(OC)C(OC)=C(Br)S%69
-6.3063993	-1.7375623	3.150952	4.568837	1.4178851	C1=C(N=CN=C1Br)Br	Brc1cc(I)c(Br)cc1I
-6.6442385	-3.68189	2.3640904	2.9623485	0.598258	C1=CC(=C(C=C1Br)NN)Br	BrC1=C([N+]([O-])=O)C([N+]([O-])=O)=C(Br)C2=NSN=C12
-5.8217034	-0.8888668	3.4844103	4.9328365	1.4484262	CC1=C(C=CC(=C1)Br)Br	CC1=CC(=C(C(=C1Br)C)Br)N
-6.116427	-3.3380232	2.1187835	2.7784038	0.6596203	C1C2=C(C=CC(=C2)Br)C3=C1C=C(C=C3)Br	O=C(N1)C2=C3C(C4=C(Br)C=C3C1=O)=C(C1=C3C(C5=CC=C34)=C(C(NC5=O)=O)C=C1Br)C=C2
-6.4602895	-1.833033	3.3376384	4.6272564	1.289618	C1=CC(=C2C(=C1Br)N=C(S2)Cl)Br	CC1=CC(=C(N=C1Br)C)Br
-6.459323	-2.8355944	2.9935079	3.6237285	0.63022065	C1(=C(C(=C(C(=C1Br)Cl)F)Cl)Br)N	BrC(C=N1)=CC2=C1C(N=CC(Br)=C1)=C1C1=NSN=C21
-6.7204156	-1.2438208	3.810522	5.476595	1.6660728	CC1=CC(=C(C=C1Br)Cl)Br	C1=C(C=C(C(=C1Br)F)Br)Cl
-7.1044226	-2.5572717	3.26606	4.5471506	1.2810905	C1=C(C=C(C=C1Br)Br)C(F)(F)F	C1=C(C=C(C=C1Br)Br)[N+](=O)[O-]
-5.910012	-1.4186754	2.962683	4.4913363	1.5286534	C1=C(C(=C(C(=C1Br)F)Br)N)F	C1COC2=C(SC(=C2O1)Br)Br
-6.296414	-2.5191607	2.4819834	3.7772532	1.2952697	C1=CC(=C(C=C1Br)F)Br	BrC1=CC=C(Br)S1(=O)=O
-6.2701654	-2.1023946	2.814818	4.167771	1.352953	C1=CN2C=C(C=C(C2=N1)Br)Br	C1=C(C(=NC=C1Br)Br)C#N
-7.4857655	-3.6492677	2.617905	3.8364978	1.2185929	C1=CC(=C(C(=C1[N+](=O)[O-])Br)F)Br	CN(C9=O)C(C%10=C(Br)C=C%11C%12=C(C(N(C)C%11=O)=O)C(Br)=CC9=C%12%10)=O
-6.1865087	-2.291347	2.5776849	3.8951616	1.3174767	C1=C(N=C(C2=NC=NN21)Br)Br	C1=C(C(=NC=C1Br)Br)N
-5.8381133	-1.61904	2.8181455	4.2190733	1.4009278	C1=CN2C=C(C=C(C2=N1)Br)Br	Brc3ccc(N(c1ccccc1)c2ccc(Br)cc2)cc3
-6.029132	-1.8111839	3.066166	4.217948	1.151782	C1=CC2=C(C=C1Br)NC3=C2C=CC(=C3)Br	C1=C(C(=NC=C1Br)Br)Cl
-5.833129	-2.2151232	2.3982291	3.6180058	1.2197766	CN1C=C(N=C(C1=O)Br)Br	BrC4=CC5=C(SC(Br)=C5)S4
-6.3488045	-2.2420106	2.9349184	4.106794	1.1718755	C1=CC2=CC(=C(N=C2N=C1)Br)Br	C1COCCC12C3=C(C=CC(=C3)Br)C4=C2C=C(C=C4)Br
-6.2305555	-2.5485668	2.320456	3.6819887	1.3615327	C1=C(SC(=C1C=O)Br)Br	CC1=C(C(C2=CC=C(OC)C=C2)=C2C(C)=C(Br)C(C)=[N+]2[B-]2(F)F)N2C(C)=C1Br
-5.9747806	-1.9452591	2.6189127	4.0295215	1.4106088	CN1C=C(C=C(C1=O)Br)Br	BrC%87=C%88C(SC(Br)=C%88)=NC%89=C%87C(F)=C(F)S%89
-6.192718	-1.9042274	3.0428638	4.288491	1.2456269	COC1=C(C=C(C=N1)Br)Br	C1=CC=C2C(=C1)C(=CN=C2Br)Br
-6.5251036	-2.7173557	2.3973997	3.8077478	1.4103482	CC(=O)C1=NC(=CN=C1Br)Br	C1=CC(=C(C=C1Br)NN)Br
-6.051847	-3.2353175	2.1519308	2.8165295	0.6645987	C1=CC2=C(C3=NSN=C3C(=C2C=C1)Br)Br	C1=C(C(=C(C(=N1)N)Br)C(F)(F)F)Br
-6.254991	-2.0933633	2.7484012	4.161628	1.4132266	CC(C)OC1=C(C=C(C=C1Br)F)Br	BrC%87=C%88C(SC(Br)=C%88)=NC%89=C%87C(F)=C(F)S%89
-6.5262265	-2.106063	3.1783423	4.4201636	1.2418213	C1=C(C(=NC=C1Br)Br)Cl	C1=CC2=C(C=C(C=C2N=C1)Br)Br
-6.240663	-1.5170342	3.4121296	4.723629	1.3114994	C1=CC=C(C=C1)C2=C(C=C(C=C2)Br)Br	C1=C(C2=NC=NN2C=C1Br)Br
-5.877655	-1.1475073	3.3309941	4.730148	1.3991537	C1=C(C(=C(C(=C1Br)Cl)Br)N)Cl	CN(CC1=CC(=CC(=C1N)Br)Br)C2CCCCC2
-6.403776	-2.265739	3.2396927	4.138037	0.8983445	C1=CC2=C(C=C1Br)S(=O)(=O)C3=C2C=CC(=C3)Br	C1=C(C=C(C(=C1Br)N=C=S)OC(F)(F)F)Br
-6.356621	-2.2961442	2.7294638	4.0604763	1.3310125	C1(=C(NN=C1Br)Br)[N+](=O)[O-]	CC1=C(N=C(N1)Br)Br
-6.4494643	-2.2734494	2.7607846	4.176015	1.4152303	C1=CN2C(=N1)C(=CC(=N2)Br)Br	[C-]#[N+]c1ccc(Br)cc1Br
-6.1362243	-1.7677048	2.8562803	4.3685193	1.512239	CC(=O)NC1=C(C=CC(=C1)Br)Br	C1=C2C(=C(C(=C1Br)N)Br)OC(O2)(F)F
-6.4489765	-2.4325829	2.7780032	4.0163937	1.2383904	C1=C(C=C(C(=C1Br)Cl)Br)Cl	C1=C(SC(=N1)Br)Br
-6.0787306	-1.9897268	2.554605	4.0890036	1.5343986	CN=[N+](C1=CC(=CC(=C1N)Br)Br)[O-]	CC(=O)NC1=CC(=CC(=C1)Br)Br
-6.341053	-1.2796028	3.4667277	5.06145	1.5947223	CC1=C(C=CC(=C1F)Br)Br	C1CC(=O)NC2=C(C=C(C=C21)Br)Br
-6.308306	-1.5227358	3.2874846	4.78557	1.4980855	COC1=CC(=C(C=C1Br)Br)F	C1=C(C=C(N=C1Br)Br)C(F)(F)F
-5.9732046	-2.848476	1.7507315	3.1247287	1.3739972	C1=CN=C(C=C1Br)C2=NC=CC(=C2)Br	C1=C(SC2=C1C(=O)C3=C2SC(=C3)Br)Br
-5.9081454	-1.2883706	3.4336133	4.619775	1.1861615	C1COCCC12C3=C(C=CC(=C3)Br)C4=C2C=C(C=C4)Br	CC1=CC(=C(C=C1Br)C)Br
-6.1055684	-1.4901893	3.0627096	4.6153793	1.5526698	CC1=CC(=C(C(=C1N)Br)F)Br	C1=CN=C(N=C1Br)Br
-6.997207	-2.1418166	3.5267806	4.8553905	1.32861	C1=C(C=NC(=C1Br)C#N)Br	CC(C)(C)c1cc(Br)c(C(C)(C)C)cc1Br
-6.059618	-1.473984	3.3535845	4.585634	1.2320497	C1=CC(=C(C=C1Br)N=C=S)Br	CC1=C(C=C(C=C1Br)N)Br
-5.8235908	-1.6340394	2.6886206	4.1895514	1.5009308	C1=C(C(=NC=C1Br)Br)F	CC1=CN2C(=CN=C2C(=C1)Br)Br
-6.9512672	-2.1382346	3.4242613	4.8130326	1.3887713	C1=CC(=NC(=C1Br)Cl)Br	O=C(O)c1cc(Br)cc(Br)c1
-5.617592	-1.1767786	3.158514	4.440813	1.282299	COC1=C(C=C(C(=C1)N)Br)Br	Brc1ccccc1c2ccccc2Br
-6.185364	-2.1356325	2.7856703	4.0497313	1.264061	C1=CC2=C(C=C1Br)SC(=N2)Br	CC1=C(C(C2=CC=C(OC)C=C2)=C2C(C)=C(Br)C(C)=[N+]2[B-]2(F)F)N2C(C)=C1Br
-5.649171	-1.34225	3.0331693	4.306921	1.2737517	CC1=CC(=C(C=C1Br)N)Br	CCOC1=C(N=C(C(=C1)N)Br)Br
-6.6286874	-2.4093766	3.0177402	4.2193108	1.2015705	C1=CC(=C(C=C1Br)[N+](=O)[O-])Br	C1=CC2=C(C=CC(=N2)Br)C=C1Br
-5.8816657	-1.2196015	3.2630944	4.662064	1.3989697	CC1=C(N(C(=N1)Br)C)Br	Cc1ccc(Br)c(Br)c1
-5.9767733	-1.9048389	2.8250167	4.071934	1.2469175	C1=C(C=NC(=N1)Br)Br	Oc1ccc2cc(Br)ccc2c1c3c(O)ccc4cc(Br)ccc34
-6.583984	-1.5907977	3.4855099	4.993186	1.5076761	C1(=C(C(=C(C(=C1Br)F)F)Br)F)F	COC1=CC(=CC(=C1)Br)Br
-6.454591	-3.1232796	2.753801	3.3313112	0.5775101	C1=CC(=C(C=C1Br)N=C=S)Br	C1(=C(C2=NSN=C2C(=C1F)Br)Br)F
-6.368386	-1.8453637	3.2787454	4.523022	1.2442768	CC(C)C1=CC(=CC(=C1Cl)Br)Br	C1=CC=C2C(=C1)C=C(N=C2Br)Br
-6.2659125	-2.2524946	2.9175777	4.013418	1.0958405	C1=CC2=C(C=C1Br)SC(=N2)Br	C1=CC2=C(C=CN=C2C(=C1)Br)Br
-5.6226745	-1.3538929	2.9777997	4.2687817	1.290982	CC1=C(N=C(S1)Br)Br	C1=CNC2=CC(=CC(=C21)Br)Br
-6.2532086	-3.0710068	2.6498978	3.1822019	0.53230405	C1(=C(C2=NSN=C2C(=C1F)Br)Br)F	N#CC(C#N)C3c1cc(Br)ccc1c2ccc(Br)cc23
-6.0167265	-1.5800966	3.0337105	4.43663	1.4029193	COC1=C(C(=CC(=N1)Br)Br)N	COC1=C(C=NC=C1Br)Br
-6.165765	-1.4524148	3.0158973	4.7133503	1.697453	CC1=C(C=C(C(=O)N1C)Br)Br	C1=C(C(=C(C(=N1)Cl)Br)N)Br
-7.0726795	-2.6328874	3.0770996	4.439792	1.3626926	C1=C(C=C(C(=C1Br)Cl)Br)Cl	[O-][N+](=O)c1cc(Br)ccc1Br
-7.0320125	-2.4969814	3.170702	4.5350313	1.3643293	CC1=CC(=CC(=C1Br)[N+](=O)[O-])Br	CC1=CC(=C(C(=C1)Br)F)Br
-6.262182	-2.6852937	2.125041	3.5768886	1.4518476	COC(=O)C1=C(C=C(C=C1)Br)Br	O=C1N(C)C2=CC(Br)=CC=C2/C1=C/C=C1C2=CC=C(Br)C=C2N(C)C/1=O
-6.587789	-2.515273	2.7943141	4.072516	1.2782018	C1=C(N=CC2=C(NN=C21)Br)Br	CC1=CC(=C(C(=C1)Br)[N+](=O)[O-])Br
-5.953341	-1.1191776	3.2521727	4.8341637	1.581991	CCC1=CC(=C(C(=C1)Br)N)Br	Brc1cncc(Br)c1
-6.265428	-1.3075898	3.431488	4.957838	1.52635	C1=CC(=C(C(=C1)Br)Cl)Br	C1=C(C(=NC(=C1Br)Cl)N)Br
-6.608962	-2.2987854	2.9310796	4.310177	1.3790972	C1=CC(=C(C(=C1Cl)Br)Cl)Br	CN1C=C(N=C(C1=O)Br)Br
-6.2408752	-2.9143815	2.4211493	3.3264937	0.9053445	C1=C(C=NC(=C1Br)N)Br	CN(C9=O)C(C%10=C(Br)C=C%11C%12=C(C(N(C)C%11=O)=O)C(Br)=CC9=C%12%10)=O
-6.8836684	-2.7334719	2.9475994	4.1501966	1.2025971	C1=CC(=C(C(=C1[N+](=O)[O-])Br)F)Br	C1=CC2=C(C(=C1)Br)N=C(C=C2)Br
-5.2743025	-2.4266472	2.0558143	2.8476553	0.79184103	C1=CC(=C2C(=C1Br)N=CC=N2)Br	BrC(S%16)=CC%17=C%16C(SC(Br)=C%18)=C%18N%17C
-6.408778	-2.4342747	2.707375	3.9745035	1.2671285	C1(=C(N=C(N1)Br)Br)C(F)(F)F	O=C1C2=C(C)SC(C)=C2C(C2=C(Br)SC(Br)=C21)=O
-5.8628383	-1.1150959	3.366425	4.7477427	1.3813176	CC1=C(C=CC(=C1C)Br)Br	C1=C(C=C2C(=C1Br)N=C(S2)N)Br
-6.1739383	-2.2538242	2.702836	3.920114	1.217278	C1=C(C(=CC(=C1Br)[N+](=O)[O-])Br)N	C1=C(C(=CC(=C1Br)F)Br)N
-7.2990074	-2.7768464	3.0881379	4.522161	1.4340231	C1=C(C(=C(C(=C1F)Br)[N+](=O)[O-])Br)F	C1=C(C(=C(C=N1)Br)Cl)Br
-6.4943113	-2.330786	2.9886923	4.1635256	1.1748333	C1=CC(=C(C=C1Br)C(F)(F)F)Br	COC%41=CC=CC(C%42=NC(C(Br)=CC=C%43Br)=C%43N=C%42C%44=CC(OC)=CC=C%44)=C%41
-5.8679976	-1.3535012	3.2398891	4.5144963	1.2746072	C1=CNC2=CC(=CC(=C21)Br)Br	O=C(O)c1cc(Br)cc(Br)c1
-5.8446827	-1.4058022	2.9778717	4.4388804	1.4610088	COC1=NC=C(C2=NNC(=C21)Br)Br	CC1=CC(=C(C(=C1C)Br)N)Br
-6.3459454	-2.160664	3.0343723	4.1852813	1.150909	BrC1=NC2=CC=C(Br)C=C2O1	Brc3ccc(c2ccc(c1ccc(Br)cc1)cc2)cc3
-7.1319766	-3.8364778	1.6950254	3.2954988	1.6004734	C1=C(C=C(N=C1Br)Br)Cl	O=c1cc(Br)c(=O)cc1Br
-6.1978474	-1.7124658	3.2731102	4.4853816	1.2122715	[C-]#[N+]c1ccc(Br)cc1Br	C1=CC2=C(C=C1Br)SC3=C2C=CC(=C3)Br
-6.9126587	-2.5882254	2.9062507	4.3244333	1.4181826	C1(=C(N=C(N1)Br)Br)C(F)(F)F	C1=C(C(=CC(=C1Br)F)Br)[N+](=O)[O-]
-6.46249	-1.7544916	3.001389	4.7079983	1.7066092	C1(=C(N=C(N1)Br)Br)C(F)(F)F	C1=C(C=C(C(=C1Br)F)Br)F
-6.550616	-2.5363338	2.5154846	4.014282	1.4987977	CC(=O)NC1=C(C=CC(=C1)Br)Br	CC(=O)C1=NC(=CN=C1Br)Br
-6.138281	-2.94322	2.6203692	3.195061	0.5746918	C1=C(C=NC(=C1Br)N)Br	C1(=C(C2=NSN=C2C(=C1F)Br)Br)F
-6.6190615	-2.7748532	2.650318	3.8442082	1.1938903	COC1=CC(=C(C=C1Br)Br)F	C1=C(C(=CN=C1Br)[N+](=O)[O-])Br
-6.165813	-2.62248	2.4245033	3.543333	1.1188297	C1=C(C=C(C(=C1Br)N)OC(F)F)Br	C1(=C(SC(=C1[N+](=O)[O-])Br)Br)[N+](=O)[O-]
-5.831334	-1.7089299	2.9021738	4.122404	1.2202303	CCOC1=C(N=C(C(=C1)N)Br)Br	O=S(OC)(C1=CC(Br)=CC=C1C1=CC=C(Br)C=C1S(OC)(=O)=O)=O
-6.1470532	-0.9589992	3.4670901	5.188054	1.720964	CC1=CC(=CC(=C1C)Br)Br	C1=C(C(=C(C(=C1Br)Cl)Br)N)F
-6.2209363	-1.9995054	2.6946526	4.221431	1.5267782	C1=CN2C(=N1)C(=CC(=N2)Br)Br	CC1=C(C(=C(C=C1F)Br)N)Br
-5.080516	-2.172981	2.1071029	2.9075348	0.80043197	BrC(S6)=CC7=C6C(SC(Br)=C8)=C8S7	COC%31=C%32C(C=C(Br)S%32)=C(OC)C%33=C%31C=C(Br)S%33
-6.7373104	-2.0024807	3.3175693	4.73483	1.4172606	CC1=C(C=CN=C1Br)Br	Brc1ccc(cc1)C(=O)c2ccc(Br)cc2
-6.4848366	-1.2239797	3.6139004	5.2608566	1.6469562	CC1=C(C=CN=C1Br)Br	Brc1cc(I)c(Br)cc1I
-5.948052	-1.1307395	3.355333	4.8173122	1.4619792	COC1=C(C=C(C(=C1)N)Br)Br	C1=C(C(=C(C(=C1Cl)Br)Cl)Br)N
-6.5063453	-2.25859	2.9253755	4.247755	1.3223796	C1COC2=CC(=CC(=C2C1=O)Br)Br	C1=CC=C2C(=C1)C(=CN=C2Br)Br
-6.083257	-2.861103	1.9059824	3.2221541	1.3161718	C1CC2=C(C(=CC(=N2)Br)Br)NC1	C1=C(C=C2C(=C1Br)C(=O)C(=O)N2)Br
-6.06944	-1.1291503	3.3582232	4.9402895	1.5820663	COC1=C(C(=NC=C1Br)N)Br	BrC1=CC=C(OC2=CC=C(Br)C=C22)C2=C1
-5.704617	-0.76537025	3.2542353	4.9392467	1.6850114	CC1=CC(=CC(=C1Br)C)Br	C1CCN(CC1)C2=CC(=CC(=C2)Br)Br
-6.574808	-2.279487	3.0402107	4.2953215	1.2551107	C1=C(C=C(C(=C1Br)C#N)F)Br	C1=C(N=CC2=C(NN=C21)Br)Br
-7.1194773	-3.0517862	2.5632505	4.067691	1.5044403	C1=C(C(=C(N=C1Br)Br)[N+](=O)[O-])N	C1=C(N=C(C(=N1)Cl)Br)Br
-6.362467	-2.3422098	2.8951528	4.020257	1.1251042	C1=C(C=C(C=C1Br)Br)C(=O)Cl	C1=C(C=C(C(=C1Br)N)Br)S(=O)(=O)N
-6.634276	-2.9643698	1.8613187	3.6699061	1.8085874	C1=C(C=C(C(=C1Br)N=C=S)OC(F)(F)F)Br	CCN1C2=C(C=C(C=C2C(=O)C1=O)Br)Br
-6.3683133	-2.9354632	2.4277442	3.4328501	1.005106	C1=CC2=C(C=C1Br)SC(=N2)Br	C1=CC2=C(C=C1Br)C(=O)C3=C(C2=O)C=C(C=C3)Br
-6.9129086	-2.6960258	2.9618244	4.2168827	1.2550583	Brc3ccc(c2ccc(c1ccc(Br)cc1)cc2)cc3	C1=C(C(=NC=C1Br)Br)[N+](=O)[O-]
-6.10339	-2.6175444	2.9028294	3.4858458	0.5830164	C1=C(C(=CN=C1Br)N)Br	BrC(C=N1)=CC2=C1C(N=CC(Br)=C1)=C1C1=NSN=C21
-6.074726	-1.2812606	3.1870878	4.7934656	1.6063778	C1=CC(=C(C=C1Br)F)Br	C1=C(C(=C(C(=C1Br)N)Br)F)F
-6.415868	-2.353676	2.6794758	4.062192	1.3827162	C1=C(C=C(C(=C1Br)C=O)Br)F	C1=C(C(=C(C(=C1Br)F)C#N)N)Br
-5.787741	-2.0319858	2.573278	3.7557554	1.1824775	C1=CC2=C(C=C1Br)N=C(S2)Br	C1COC2=C(SC(=C2O1)Br)Br
-6.207915	-2.2746263	2.8195615	3.9332886	1.1137271	COC1=NC=C(C2=NNC(=C21)Br)Br	O=S3(=O)c1ccc(Br)cc1c2cc(Br)ccc23
-6.8265023	-2.147151	2.991176	4.6793513	1.6881754	C1COC2=CC(=CC(=C2C1=O)Br)Br	CC1=C(C=C(C=C1Br)S(=O)(=O)C(F)(F)F)Br
-6.1655145	-2.994068	2.0906353	3.1714466	1.0808113	C1=CC(=C(C(=C1)Br)[N+](=O)[O-])Br	BrC%23=C%24C(N=C(C%25=N%24)C%26=CC=CC%27=CC=CC%25=C%27%26)=C(Br)S%23
-6.0866866	-2.4710603	2.2636557	3.6156263	1.3519707	CC1=CC(=C(C(=C1[N+](=O)[O-])Br)N)Br	CCOC1=C(N=C(C(=C1)N)Br)Br
-6.04127	-2.1813188	2.3603466	3.859951	1.4996045	C1=CC(=C(C=C1Br)Br)CC#N	C1=CC=C(C=C1)C(=S)NC2=C(C=CC(=C2)Br)Br
-6.9951253	-2.5036175	2.880177	4.4915075	1.6113305	C1=C(C=C(C(=C1Br)C=O)F)Br	C1=CC(=NC(=C1F)Br)Br
-6.0256124	-1.694941	3.0817213	4.3306713	1.24895	CC1=C(C=NC=C1Br)Br	C1=CSC(=C1Br)C2=C(C=CS2)Br
-6.7098737	-2.2738898	2.949792	4.4359837	1.4861917	CC(C)C1=CC(=CC(=C1Cl)Br)Br	BrC%94=NC=CC(/C=C/Br)=N%94
-6.5026455	-2.5219574	2.8160803	3.980688	1.1646078	C1=C(C=C(C=C1Br)Br)[N+](=O)[O-]	C1=CC(=C(C(=C1)Br)C2=C(N=C3C(=C2)C=NC(=N3)N)N)Br
-5.8430195	-1.1258873	3.2456944	4.717132	1.4714377	C1=C(C=C(C=C1Br)Br)N	CC1(C2=CC(=CC(=C2NC1=O)Br)Br)C
-5.64527	-1.7927011	2.7562277	3.8525686	1.0963409	C1=CC2=C(C=CC3=C2C4=C1C=CC(=C4C=C3)Br)Br	Oc1ccc2cc(Br)ccc2c1c3c(O)ccc4cc(Br)ccc34
-5.675389	-1.3424509	2.9915006	4.332938	1.3414376	C1=CNC2=CC(=CC(=C21)Br)Br	Brc2cccc(c1cccc(Br)n1)n2
-6.2652965	-1.6811967	3.0938501	4.5841	1.4902496	CC1=NC(=C(C=C1Br)Br)F	BrC1=C2C(OCCO2)=C(Br)S1
-6.506216	-1.61975	3.1253974	4.886466	1.7610686	CCC1=CC(=CC(=C1Cl)Br)Br	O=n1cc(Br)ccc1Br
-6.1668735	-1.491804	3.258043	4.6750693	1.4170263	CC1=CC(=C(C(=C1)Br)F)Br	Brc3ccc(N(c1ccccc1)c2ccc(Br)cc2)cc3
-6.920967	-1.2733401	4.002123	5.647627	1.645504	CC1=C(C=CN=C1Br)Br	CC1=C(C(=NC(=C1Br)C)C)Br
-6.12455	-2.4758701	2.4305015	3.6486797	1.2181783	C1=C(C2=NON=C2C(=C1)Br)Br	C1=C(C=C2C(=C1Br)C=NN2)Br
-5.9759383	-1.183908	3.0111132	4.7920303	1.7809172	CC1=C(C(=C(C=C1F)Br)N)Br	CN1C=C(C(=O)C(=C1)Br)Br
-5.708825	-1.888723	2.6232772	3.8201022	1.196825	COC1=C(C=C(C2=C1N=CC=C2)Br)Br	BrC4=CC5=C(SC(Br)=C5)S4
-5.904905	-1.3732167	3.0158546	4.531688	1.5158336	CC(C)(C)C1=CC(=C(C(=C1)Br)N)Br	C1=C(C2=NC=NN2C=C1Br)Br
-5.977484	-1.6798652	3.2073214	4.297619	1.0902975	C1=C(C(=CC(=C1F)Br)Br)N	C1=C(C(=C(C(=N1)N)Br)C(F)(F)F)Br
-5.6184645	-1.3892113	2.838919	4.2292533	1.3903344	C1=C(C(=C(C(=C1Br)F)Br)N)F	BrC%70=CC=C(Br)N%70C
-6.3008256	-2.245902	2.7115617	4.0549235	1.3433619	CN1C(=C(N=C1Br)C#N)Br	C1=C(N=CC2=NNC(=C21)Br)Br
-6.6105566	-1.34954	3.6025822	5.261017	1.6584346	C1=C(C=C(C=C1Br)Br)OC(F)F	C1=C(C=C(C=C1Br)Br)C(F)F
-7.1229935	-2.8388252	2.7748802	4.2841682	1.5092881	C1=C(C(=CC(=C1Br)F)Br)F	C1=C(C=NC(=C1Br)[N+](=O)[O-])Br
-6.117503	-0.94683397	3.4822376	5.170669	1.6884315	C1=CC(=C(C(=C1)Br)F)Br	Brc1cc(I)c(Br)cc1I
-6.463624	-2.94282	2.1636353	3.520804	1.3571687	CC1=CC(=C(C(=C1[N+](=O)[O-])Br)N)Br	BrC1=C(N=C(C)C(C)=N2)C2=C(Br)C2=NC(C)=C(C)N=C12
-5.9846087	-2.1360884	2.632228	3.8485203	1.2162924	C1=C(C=C(C(=C1Br)F)Br)N	CC(=O)C1=C(SC(=C1)Br)Br
-5.9374604	-1.5656333	2.8700054	4.371827	1.5018218	C1=C(C=C(C(=C1Br)N)C#N)Br	BrC1=NC2=CC=C(Br)C=C2O1
-6.6379433	-2.0246766	3.1996481	4.613267	1.4136188	C1=C(C=NC(=N1)Br)Br	COC1=CC(=NC(=C1)Br)Br
-6.5623302	-1.1746597	3.6941473	5.3876705	1.6935232	CC1=C(C=C(C(=C1Cl)Br)Cl)Br	Oc1ccc(Br)cc1Br
-6.1219435	-1.6997685	2.839817	4.422175	1.5823579	C1=C(C=NN=C1Br)Br	CC1=C(N=C(N1C)Br)Br
-6.575054	-2.9925675	1.8701038	3.5824866	1.7123828	C1=CC=C(C=C1)C(=O)NC2=C(C=CC(=C2)Br)Br	C1=C(C=C2C(=C1Br)NC(=O)C2=O)Br
-6.1016507	-1.8760948	3.02882	4.225556	1.1967359	Cc3ccc(c2ccc1cc(Br)cc(Br)c1n2)cc3	C1=CC2=C(C=C1Br)C(=CO2)Br
-6.6263156	-1.298986	3.7769804	5.3273296	1.5503492	CC1=C(C=CC(=C1)Br)Br	C1=C(C=C(C(=C1Cl)Br)F)Br
-6.7397237	-1.3964754	3.7448874	5.3432484	1.598361	CCC1=C(C=C(C=N1)Br)Br	C1=C(C=C(C(=C1Br)F)Cl)Br
-6.1355233	-2.182423	2.7514725	3.9531002	1.2016277	CN1C=C(C(=O)C(=C1)Br)Br	BrC1=CC=C(C(C=CC(Br)=C2)=C2B2C3=CC=C(C#N)C=C3)C2=C1
-5.720998	-1.6186714	2.8046033	4.1023264	1.297723	CN(CC1=CC(=CC(=C1N)Br)Br)C2CCCCC2	C1=CC2=C(C=C1Br)SC(=N2)Br
-6.683783	-2.6908846	2.9986858	3.9928985	0.9942126	C1=C(C=C2C(=C1Br)N=C(S2)Cl)Br	C1=C2C=C(C=NC2=C(C=C1[N+](=O)[O-])Br)Br
-6.561642	-3.0652475	2.0428302	3.4963946	1.4535644	C1=CC2=C(C=C1Br)C(=O)C(=O)C3=C2C=CC(=C3)Br	C1=CC2=C(C=CN=C2C=C1Br)Br
-6.4322376	-1.7842412	3.3012228	4.6479964	1.3467736	COc1c(Br)cc(Cl)cc1Br	C1=CC(=NC(=C1F)Br)Br
-5.919769	-1.9905384	2.6893392	3.9292305	1.2398913	CC1=C(C=C2C(=CNC2=N1)Br)Br	O=C%51C%52=C(Br)SC(Br)=C%52C(C%51)=O
-6.8735847	-1.8209691	3.6993997	5.0526156	1.3532159	C1=C(C=C(C=C1Br)Br)OC(F)(F)F	C1=CC(=C(C(=C1F)Br)F)Br
-6.6759543	-2.6996136	2.8045878	3.9763408	1.1717529	C1=C(C(=CN=C1Br)Br)[N+](=O)[O-]	BrCc1ccc(CBr)cc1
-6.5549817	-1.3709047	3.6114485	5.1840773	1.5726287	C1=CC(=C(C=C1Br)F)Br	CC1=C(C=CC(=C1F)Br)Br
-6.253123	-1.9995501	2.9487364	4.2535725	1.304836	COC1=C(C=C(C=C1Br)F)Br	C1(=C(N=C(C(=N1)Cl)Br)Br)N
-6.148652	-2.4029033	2.6199589	3.7457488	1.1257899	C1=C(C=C(C(=C1Br)N)C(F)(F)F)Br	C1=C(C(=CN=C1Br)Br)C=O
-6.3560905	-1.930208	2.985957	4.4258823	1.4399254	C1=C(N=C(S1)Br)Br	BrC#CBr
-5.2889953	-1.9452713	2.4138727	3.343724	0.9298513	C1=CC2=C(C=CC(=C2)Br)C=C1Br	C1=C(SC2=C1SC3=C2SC(=C3)Br)Br
-6.5013323	-1.4316137	3.5835762	5.0697184	1.4861422	C1=CC(=C(C(=C1Cl)Br)Cl)Br	C1=C(C2=C(S1)C(=CS2)Br)Br
-7.2152524	-2.8561735	2.8647099	4.359079	1.494369	C1(=C(C(=C(C(=C1F)F)Br)F)F)C2=C(C(=C(C(=C2F)F)Br)F)F	C1=CC(=NC(=C1C=O)Br)Br
-6.146958	-1.7064171	3.0951407	4.440541	1.3454001	CC1=C(C=CC(=C1)Br)Br	CC1=CN2C=C(N=C(C2=N1)Br)Br
-6.548867	-1.5761472	3.633097	4.97272	1.3396232	C1=C(C(=CC(=C1Br)Cl)Br)Cl	C1=CC=C(C=C1)COC2=C(C=C(C=N2)Br)Br
-5.780482	-1.368208	3.0886471	4.412274	1.3236268	C1=CC(=C(C=C1Br)C(F)(F)F)Br	C1CCN(CC1)C2=CC(=CC(=C2)Br)Br
-6.2640653	-1.3132422	3.5143952	4.950823	1.4364276	COC1=C(C=C(C=C1)Br)Br	C1=C(C=C(C(=C1Br)Cl)F)Br
-5.823503	-1.9471376	2.5042148	3.8763654	1.3721507	C1=C(N=C(C(=N1)Br)N)Br	BrC%70=CC=C(Br)N%70C
-6.3249454	-2.442925	2.5694842	3.8820205	1.3125362	C1=CN2C(=N1)C(=CC(=N2)Br)Br	C1=C(N=C(S1)Br)Br
-5.6711125	-0.9352304	3.1681023	4.7358823	1.56778	COC1=CC(=C(C=C1Br)Br)F	CCN1C2=C(C=C(C=C2)Br)C3=C1C=CC(=C3)Br
-7.172759	-2.1394265	3.413598	5.033333	1.6197348	CN1C(=NC(=N1)Br)Br	C1=C(C(=CN=C1Br)Br)C(F)(F)F
-6.0452747	-1.3353336	3.2013807	4.709941	1.5085602	CC1=C(C(=NC=C1Br)F)Br	CC1=CC(=NC(=C1N)Br)Br
-6.323832	-3.6641738	1.9067702	2.6596582	0.75288796	CC(C)OC1=C(C=C(C=C1Br)F)Br	C12=C(C3=NSN=C3C(=C1N=S=N2)Br)Br
-5.773224	-1.3664317	3.0854018	4.406792	1.3213904	COC1=C(C(=CC(=N1)Br)Br)N	COC1=C(C=C(C=N1)Br)Br
-5.878107	-3.4458854	1.7917045	2.4322217	0.6405171	C1=C(C=C(C(=C1Br)N)C#N)Br	C12=C(C3=NSN=C3C(=C1N=S=N2)Br)Br
-5.8601756	-1.4033483	3.1492298	4.456827	1.3075974	C1=C(C(=CC(=C1F)Br)Br)N	BrC1=CC=C(C(C=CC(Br)=C2)=C2B2C3=CC=CC=C3)C2=C1
-5.9307656	-1.1670604	3.30404	4.7637053	1.4596653	C1=CC(=C(C=C1Br)CC#N)Br	CC1=C(SC(=C1Br)C)Br
-6.4192004	-2.896844	2.3786898	3.5223565	1.1436667	C1=C(N=C(C2=NC=NN21)Br)Br	O=CC%73=CC(S%74)=C(S%73)C%75=C%74C(Br)=C(C(SC(C=O)=C%76)=C%76S%77)C%77=C%75Br
-6.4243693	-3.0452836	1.9015249	3.3790858	1.4775609	CC(=O)C1=NC(=CN=C1Br)Br	O=C1N(C)C2=CC(Br)=CC=C2/C1=C/C=C1C2=CC=C(Br)C=C2N(C)C/1=O
-6.652952	-2.3195767	3.115852	4.3333755	1.2175233	C1=CN=CC2=C1C(=CC(=N2)Br)Br	CCC1=CC(=CC(=C1Cl)Br)Br
-5.7743535	-1.7279953	2.782404	4.046358	1.2639542	C1=C(C(=C(C(=C1F)Br)F)Br)F	C1=CC2=C(N=C(C=C2C=C1Br)N)Br
-6.0680494	-1.5673106	3.236154	4.500739	1.264585	C1=C(C=C(C(=C1Br)F)Br)N	O=S(OC)(C1=CC(Br)=CC=C1C1=CC=C(Br)C=C1S(OC)(=O)=O)=O
-5.7884154	-1.4844823	3.1855252	4.303933	1.118408	COC1=CC(=C(C=C1Br)Br)OC	COc1cc(Br)c(Br)cc1OC
-6.2964	-2.7107716	2.4301682	3.5856285	1.1554604	C1=C(C=C(C=C1Br)Br)C(=O)Cl	CN%66C(C%67=CC%68=C(Br)SC(Br)=C%68C=C%67C%66=O)=O
-6.866137	-1.7108982	3.5883517	5.155239	1.5668874	C1=C(C=C(C(=C1Br)F)C#N)Br	CC1=C(C=C(C=N1)Br)Br
-6.328919	-2.1506052	3.077827	4.1783137	1.1004868	C1=CC(=C2C(=C1Br)N=C(S2)Cl)Br	Brc1ccccc1c2ccccc2Br
-6.439726	-1.6108845	3.3860254	4.828841	1.4428158	COC1=CC(=C(C(=C1)Br)Cl)Br	Brc2cccc(c1cccc(Br)n1)n2
-6.345741	-2.0095305	2.8484926	4.3362103	1.4877176	C1=CC(=C(C=C1Br)F)Br	C1=C(C(=C(N=C1C(F)(F)F)Br)N)Br
-6.4783797	-2.5622315	2.648111	3.9161482	1.2680371	C1=CC(=C(C=C1Br)Br)C=O	BrC%28=NC%29=C(N=C(Br)S%29)S%28
-5.4915614	-2.0637605	2.347141	3.427801	1.0806599	C1=CC2=C(C=CN=C2C(=C1)Br)Br	BrC(S%16)=CC%17=C%16C(SC(Br)=C%18)=C%18N%17C
-6.427648	-2.7383444	2.7716517	3.6893036	0.9176519	C1=C(C=C(N=C1Br)Br)[N+](=O)[O-]	CC1=C(N=C(S1)Br)Br
-5.951251	-1.6612539	3.0590258	4.289997	1.2309713	CC1=CC(=CC(=C1)Br)Br	CC1=C(N=C(S1)Br)Br
-5.975613	-1.4361448	3.1815753	4.5394683	1.357893	C1=C(C(=NC(=C1Br)Cl)N)Br	C1=CC2=C(C(=C1)Br)SC3=C2C=CC=C3Br
-6.982771	-2.881902	2.4831765	4.100869	1.6176927	C1=CC(=C(C(=C1)Br)C#N)Br	BrC%93=NN=C(Br)C=N%93
-6.150151	-1.659641	3.0217276	4.49051	1.4687824	CC1=C(N=C(C(=N1)N)Br)Br	C1=CC(=C(C(=C1)Br)CN)Br
-5.8021717	-1.4186075	2.8785017	4.383564	1.5050623	C1=CN=C(C=C1Br)Br	C1CCN(C1)C2=CC(=CC(=C2)Br)Br
-7.1321206	-2.3033168	3.2167194	4.828804	1.6120846	C1=C(C=C(C(=C1Cl)Br)F)Br	C1=CN=C(N=C1Br)Br
-6.1237135	-1.1712453	3.2828858	4.952468	1.6695821	C1=C(C(=C(C(=C1Br)N)Br)F)F	CCC1=C(C=CC(=C1)Br)Br
-6.2439423	-2.2918441	3.175911	3.9520981	0.7761872	C1=CC(=C(C=C1Br)S)Br	C1=C(C=C(C=C1Br)Br)C(=O)Cl
-6.776519	-1.5793357	3.7574747	5.197183	1.4397085	C1=CC(=C(C=C1Br)C(F)(F)F)Br	CC1=C(C=CC(=C1F)Br)Br
-7.065036	-3.006991	2.3046813	4.058045	1.7533636	C1=C(N=C(C(=N1)Br)C=O)Br	COC(=O)C1=C(C=C(C=C1)Br)Br
-6.449165	-1.6901786	3.3536189	4.7589865	1.4053676	C1=CN2C(=NC(=N2)Br)C=C1Br	COC1=C(C(=NC=C1Br)OC)Br
-6.046957	-2.1125522	2.7834074	3.9344049	1.1509974	C1=C(C2=NNC(=C2C=N1)Br)Br	C1=CC2=C(C=CC(=C2)Br)C=C1Br
-5.8976407	-1.3400967	3.191218	4.5575438	1.3663259	C1(=C(C(=C(C(=C1Br)Cl)F)Cl)Br)N	CC1=C(N=C(N1C)Br)Br
-5.5812554	-1.271205	2.905464	4.3100505	1.4045866	COC1=C(C=C(C(=C1)N)Br)Br	C1=CN2C=C(C=C(C2=N1)Br)Br
-5.8453965	-1.3375449	3.267332	4.5078516	1.2405195	C1=C(C2=C(S1)C(=CS2)Br)Br	C1=C(C=C2C(=C1Br)C=NN2)Br
-6.7154284	-2.5819464	2.8766034	4.133482	1.2568786	C1=C(N2C=C(N=C(C2=N1)Br)Br)Cl	C1=C(C=NC(=C1Br)C#N)Br
-6.8651032	-1.9221209	3.6290553	4.942982	1.3139269	C1=CC(=C(C=C1OC(F)(F)F)Br)Br	[C-]#[N+]c1ccc(Br)cc1Br
-6.197366	-2.142488	2.6952515	4.054878	1.3596268	C1(=C(N=C(N1)Br)Br)C(F)(F)F	C1(=C(N=C(C(=N1)Cl)Br)Br)N
-6.9170403	-3.0708368	2.9037528	3.8462036	0.94245076	COCN1C(=NC(=N1)Br)Br	C1(=C(C2=NSN=C2C(=C1F)Br)Br)F
-6.5928073	-2.6752439	2.8157063	3.9175634	1.1018572	C1=C(C=C2C(=C1Br)N=CN=C2Cl)Br	BrC#CC#CBr
-6.121752	-1.6222467	3.3168533	4.499505	1.1826518	CC(=O)NC1=C(C=CC(=C1)Br)Br	BrC(C=C1)=CC2=C1C(C1=CC=CC=C1C(OC)=O)C(C=CC(Br)=C1)=C1O2
-6.1433134	-1.9011234	3.0647566	4.24219	1.1774333	COC1=C(C=CC(=C1)Br)Br	C1=CC(=CC2=C1C=CC(=N2)Br)Br
-6.1713233	-1.8491607	3.1868594	4.3221626	1.1353033	C1=CC=C(C=C1)OC2=CC(=CC(=C2)Br)Br	BrC1=CC=C(C(C=CC(Br)=C2)=C2B2C3=CC=C(C#N)C=C3)C2=C1
-6.0697603	-2.329329	2.5748763	3.7404313	1.165555	C1=C(C(=C(C(=N1)Br)N)N)Br	C1=C(C=C(N=C1Br)Br)C=O
-5.5336566	-1.4609753	2.6638699	4.0726814	1.4088116	C1CC2=C(C(=CC(=N2)Br)Br)NC1	C1=C(OC(=C1)Br)Br
-5.888889	-1.3426512	2.9425724	4.5462375	1.6036651	C1=C(C=C2C(=C1Br)C(=NN2)N)Br	CC1=C(C(=NC=C1Br)Cl)Br
-6.046276	-2.5560775	2.5231693	3.4901986	0.96702933	C1=CN=CC2=C1C(=CC(=N2)Br)Br	BrC(S6)=CC7=C6C(SC(Br)=C8)=C8S7
-6.690613	-2.738358	3.0079277	3.9522548	0.9443271	C1=C2C(=CC(=C1Br)Br)C(=O)OC2=O	C1=C(C(=CN=C1Br)Br)N
-5.773222	-1.3317904	3.164404	4.4414315	1.2770276	CC1=CC(=C(C=C1Br)Br)N	C1=CC(=NC=C1Br)C2=NC=C(C=C2)Br
-6.0859413	-1.8046838	3.0834298	4.2812576	1.1978278	C1(=C(C(=C(C(=C1Br)Cl)F)Cl)Br)N	C1=CC2=C(C=C1Br)SC3=C2C=CC(=C3)Br
-6.0837073	-1.5031309	3.1506267	4.5805764	1.4299498	CC1=C(N=C(C=C1)Br)Br	C1=CC2=C(C(=C1)Br)SC3=C2C=CC=C3Br
-6.4656343	-2.8668594	2.4847775	3.598775	1.1139975	C1=C(C(=CN=C1Br)[N+](=O)[O-])Br	C1=CN=C(C(=C1Br)N)Br
-6.0632915	-1.2636716	3.3756168	4.7996197	1.4240029	C1=C(C=C(C(=C1Br)F)Br)N	C1=CC=C(C=C1)C2=C(C=C(C=C2)Br)Br
-6.596205	-1.3860657	3.834404	5.2101393	1.3757353	C1=CC=C(C=C1)C2=C(C=C(C=C2)Br)Br	CC1=C(C=C(C(=C1Cl)Br)Cl)Br
-6.738809	-1.4169065	3.7474537	5.3219028	1.5744491	CC1=CC(=C(C=C1Br)Cl)Br	C1=C(C=C(C(=C1Br)F)Cl)Br
-5.9403243	-1.2128431	3.234635	4.7274814	1.4928463	CC(C)(C)C1=CC(=C(C(=C1)Br)Cl)Br	CN1C=C(N=C1Br)Br
-6.3027744	-1.294964	3.3922286	5.0078106	1.615582	C1=C(C(=C(C(=C1Br)Cl)Cl)N)Br	CC1=C(C(=NC=C1Br)C)Br
-5.955633	-0.9251715	3.4292974	5.030462	1.6011643	C1=CC(=C(C(=C1F)Br)F)Br	CC1=C(C=CC(=C1Br)N)Br
-5.962575	-1.9140712	2.7926722	4.048504	1.2558317	COC1=NC=C(C2=NNC(=C21)Br)Br	Brc1cc(I)c(Br)cc1I
-5.6720524	-1.3193825	2.8975894	4.3526697	1.4550803	C1=CC=C(C(=C1)Br)Br	C1=C(C=C2C(=C1Br)C(=NN2)N)Br
-6.412382	-1.4762274	3.2143965	4.936155	1.7217584	C1(=C(C(=C(C(=C1Br)F)F)Br)F)F	CS(=O)(=O)C1=CC(=C(C(=C1)Br)N)Br
-6.165719	-2.2337348	2.7113237	3.9319842	1.2206604	C1CCOC(C1)N2C(=NC(=N2)Br)Br	O=C(Br)C%78=CC(S%79)=C(S%78)C%80=C%79C=C(C(SC(C(Br)=O)=C%81)=C%81S%82)C%82=C%80
-6.284705	-2.854051	2.092439	3.430654	1.3382151	CC1=C(C=CC(=C1[N+](=O)[O-])Br)Br	O=C1N(C)C2=CC(Br)=CC=C2/C1=C/C=C1C2=CC=C(Br)C=C2N(C)C/1=O
-6.677392	-1.6259546	3.6310587	5.0514374	1.4203787	CC1=CC(=C(C=C1Br)Cl)Br	C1=CN=C(C=C1Br)Br
-5.809128	-2.5216045	2.3307223	3.2875233	0.95680094	C1=C(C(=CN=C1Br)Br)C=O	COC%31=C%32C(C=C(Br)S%32)=C(OC)C%33=C%31C=C(Br)S%33
-7.026122	-2.6340663	3.0551496	4.3920555	1.336906	CC(C)OC1=C(C=C(C=C1Br)F)Br	C1(=C(NN=C1Br)Br)[N+](=O)[O-]
-5.8291473	-2.589093	2.0029037	3.2400544	1.2371507	C1=C(SC(=N1)Br)Br	BrC%61=C%62C(F)=CSC%62=C(Br)S%61
-5.87812	-2.4058025	2.4778118	3.4723175	0.99450564	C1=CC=C(C=C1)C2=NC3=C(C=CC(=C3S2)Br)Br	BrC%28=NC%29=C(N=C(Br)S%29)S%28
-6.8186116	-3.053263	2.4946363	3.7653487	1.2707124	C1=CN=C(C(=C1Br)[N+](=O)[O-])Br	C1=C(SC(=C1C=O)Br)Br
-6.3482585	-2.0976577	3.2010632	4.250601	1.0495377	C1=CC2=C(C=C1Br)S(=O)(=O)C3=C2C=CC(=C3)Br	CC(C)OC1=C(C=C(C=C1Br)F)Br
-6.1883993	-1.9439284	2.9760916	4.244471	1.2683794	C1C2=CC(=CC(=C2NC1=O)Br)Br	C1=CC2=C(C=CN=C2C(=C1)Br)Br
-6.0977626	-2.870215	2.3604383	3.2275476	0.8671093	C1=CC=C(C=C1)C(=S)NC2=C(C=CC(=C2)Br)Br	C1=C2C=C(C=NC2=C(C=C1[N+](=O)[O-])Br)Br
-5.782116	-2.1866899	2.7374284	3.595426	0.85799766	C1=C2C=C(SC2=CC3=C1SC(=C3)Br)Br	C1=C(C=C(C=C1Br)Br)C=O
-7.455454	-2.811717	3.244506	4.643737	1.399231	C1=C(C(=C(C(=C1Br)F)[N+](=O)[O-])Br)F	C1=C(C(=CC(=C1Br)F)Br)C#N
-5.7226233	-2.7510834	1.9504867	2.97154	1.0210533	C1=CC(=C2C(=C1Br)C=CN2)Br	C1=CC2=C(C=C1Br)C(=O)C(=O)C3=C2C=CC(=C3)Br
-6.2066936	-2.4759655	2.5622075	3.7307281	1.1685207	C1=CC2=C(C=C1Br)N=C(S2)Br	CC1=NC2=C(N=C1C)C(Br)=CC=C2Br
-6.08273	-2.0230706	2.6453404	4.059659	1.4143186	COC1=C(C=C(C=C1Br)F)Br	CC(C)(C)N=[N+](C1=CC(=CC(=C1N)Br)Br)[O-]
-5.6572204	-1.5921454	3.2347896	4.065075	0.8302853	C1=CC(=C(C=C1Br)Br)N	C1=C(C=C(C(=C1Br)N)OC(F)(F)F)Br
-6.3832865	-2.1406512	3.169516	4.2426353	1.0731192	CC1=C(C(=C(C=C1)Br)C)Br	FC%71=NC%72C(Br)=CC=C(Br)C%72N=C%71F
-5.8847685	-1.0265489	3.3259892	4.8582196	1.5322304	C1=C(C(=C(C(=C1Br)Cl)Br)N)F	C1=CNC2=C(C=C(C=C21)Br)Br
-6.6410775	-1.6813637	3.6195421	4.959714	1.3401718	[C-]#[N+]c1ccc(Br)cc1Br	Brc3ccc(c2ccc(c1ccc(Br)cc1)cc2)cc3
-6.090055	-2.9573884	2.0041752	3.1326666	1.1284914	C1=C(C2=NNC(=C2C=N1)Br)Br	O=C1N(C)C2=CC(Br)=CC=C2/C1=C1C2=CC=C(Br)C=C2N(C)C/1=O
-6.128473	-1.3458602	3.3900976	4.782613	1.3925152	CC1=C(C=CC(=C1)Br)Br	CC%45(OC)C%46=C(C=CC(Br)=C%46)C%47=C%45C=C(Br)C=C%47
-6.1494393	-2.272319	2.913128	3.8771203	0.96399236	CC1=C(C=CC(=C1[N+](=O)[O-])Br)Br	C1=CC=C(C=C1)N2C3=C(C=CC(=C3)Br)C4=C2C=C(C=C4)Br
-5.858867	-1.9911909	2.5908499	3.8676763	1.2768264	C1=C(N=CC2=NNC(=C21)Br)Br	CN(C)C1=NC=C(N=C1Br)Br
-5.9263086	-1.8719316	2.5495143	4.054377	1.5048628	CC(=O)C1=CC(=CC(=C1N)Br)Br	O=S3(=O)c1ccc(Br)cc1c2cc(Br)ccc23
-7.233442	-2.7174382	2.8381696	4.5160036	1.677834	C1=CC(=NN=C1Br)Br	C1=CN=C(C(=C1Br)C#N)Br
-6.3931336	-2.6940734	2.5920374	3.6990602	1.1070228	CC1=C(C(=NC=C1Br)Br)[N+](=O)[O-]	CCC1=CC(=C(C(=C1)Br)N)Br
-7.356588	-2.5961673	3.2046452	4.760421	1.5557756	CC1=C(C=CN=C1Br)Br	C1=C(C(=C(C(=C1F)Br)[N+](=O)[O-])Br)F
-6.5847383	-1.6919427	3.1396852	4.8927956	1.7531104	C1=CC(=C(C(=C1Br)Cl)Cl)Br	O=n1cc(Br)ccc1Br
-6.6493673	-1.8114136	3.3721724	4.8379536	1.4657812	C1=CC2=NC(=NN2C=C1Br)Br	[C-]#[N+]C1=C(C=C(C=C1Br)F)Br
-7.0948267	-2.5908852	3.104305	4.5039415	1.3996365	C1=C(C(=NC=C1Br)Br)F	[O-][N+](=O)c1cc(Br)ccc1Br
-6.191067	-1.4199994	3.5759585	4.7710676	1.1951091	CC1=CC(=C(C(=C1)Br)C)Br	BrC(C=C1)=CC2=C1C(C1=CC=CC=C1C(OC)=O)C(C=CC(Br)=C1)=C1O2
-6.602924	-2.0282836	3.0840318	4.5746403	1.4906085	C1=CC(=NC(=C1F)Br)Br	C1=CC2=NC(=NN2C(=C1)Br)Br
-5.4282513	-1.0907099	3.0163226	4.3375416	1.321219	C1C2=C(C=CC(=C2)Br)C3=C1C=C(C=C3)Br	CC1=C(N=C(N1)Br)Br
-6.248083	-2.5530176	2.334104	3.6950655	1.3609614	CC1=C(C(=CC(=C1[N+](=O)[O-])Br)Br)N	C1(=NN=C(S1)Br)Br
-6.1332445	-2.5686555	2.5106745	3.564589	1.0539145	C1=C(C=C(C(=C1Br)N)OC(F)F)Br	C(=O)C1=C(N=C(S1)Br)Br
-6.3717494	-2.3634171	2.6190996	4.0083323	1.3892326	C1=C(NC(=N1)Br)Br	CC1=CC(=NN=C1Br)Br
-6.673819	-3.4103596	2.5208955	3.2634594	0.74256396	C1=C(C(=C(C=N1)Br)C=O)Br	C1=C(C2=NSN=C2C(=C1F)Br)Br
-6.117291	-1.8192723	2.8331244	4.2980185	1.464894	C1C2=CC(=CC(=C2NC1=O)Br)Br	BrC#CBr
-5.9223084	-1.4547987	3.0700414	4.4675097	1.3974683	COC1=C(C=C(C=C1Br)C(=NO)N)Br	C1=C(C=C(C(=C1Br)N)C#N)Br
-5.9924765	-1.3167858	3.1469057	4.6756907	1.528785	C1=C(C=C(C(=C1Br)N)C(F)(F)F)Br	C1=C(C=C(C(=C1F)Br)F)Br
-5.821996	-2.586464	2.2017794	3.2355323	1.0337529	BrC(C=C1)=CC2=C1C(C1=CC=CC=C1C(OC)=O)C(C=CC(Br)=C1)=C1O2	O=C1N(C)C(C2=CC=C(Br)C=C2)=C2C1=C(C1=CC=C(Br)C=C1)N(C)C2=O
-5.953006	-2.2774558	2.8271205	3.67555	0.84842944	C1=C(C=C(C=C1Br)Br)C(=O)Cl	C1=CC2=C(N=C(C=C2C=C1Br)N)Br
-6.22322	-1.826784	2.8931718	4.3964357	1.503264	C1=C(C(=C(C(=C1Br)Cl)Cl)N)Br	C1=CC(=NN=C1Br)Br
-6.0351624	-2.3139532	2.6374881	3.7212093	1.0837212	CC1=CC(=C(C(=C1[N+](=O)[O-])Br)I)Br	C1=CC2=C(N=C(C=C2C=C1Br)N)Br
-5.8797274	-1.231121	3.2948308	4.6486063	1.3537755	COC1=C(C=C(C(=C1Br)N)Cl)Br	CC1=C(SC(=C1Br)C)Br
-6.68303	-2.1799989	3.3279216	4.5030313	1.1751096	C1=C(C=C(C(=C1Br)N=C=S)OC(F)(F)F)Br	O=C(O)c1cc(Br)cc(Br)c1
-6.6699123	-2.0348296	3.1712775	4.6350827	1.4638052	C1=C(C=C(C(=C1Br)F)C#N)Br	C1=CC2=C(C=CN=C2C(=C1)Br)Br
-6.19696	-2.3196666	2.719212	3.8772933	1.1580813	COC1=C(C=C(C=N1)Br)Br	C1=C(SC(=C1C=O)Br)Br
-5.888037	-2.1928942	2.52006	3.695143	1.1750829	CC1=NC(=CC(=C1)Br)Br	BrC%61=C%62C(F)=CSC%62=C(Br)S%61
-7.374696	-2.824778	2.967105	4.5499177	1.5828128	C1=C(C=C(C=C1Br)Br)C(F)F	C1=CN=C(C(=C1Br)[N+](=O)[O-])Br
-6.6214213	-2.7176352	2.6065264	3.9037862	1.2972598	C1=C(C(=CC(=C1Br)Cl)Br)Cl	O=S1(=O)C(Br)=CC=C1Br
-6.4415827	-1.9003446	2.8031058	4.541238	1.738132	CC(C)OC1=CC(=CC(=C1)Br)Br	CC1=CC(=NN=C1Br)Br
-6.252475	-2.3246787	2.6429594	3.9277961	1.2848368	C1=CC(=C(C(=C1Br)F)F)Br	C1=C(N=C(C(=N1)Br)N)Br
-6.4464245	-2.4825768	2.9422414	3.9638476	1.0216062	C1=CC2=C(C=C1Br)SC(=N2)Br	C1=CC(=NC(=C1Br)Cl)Br
-6.205053	-1.966748	2.9653542	4.238305	1.2729509	CC1=C(C=C(C=C1)Br)Br	CC(=O)C1=C(SC(=C1)Br)Br
-6.0726075	-1.7423521	3.20263	4.3302555	1.1276255	CC1=CC(=C(C(=C1N)Br)Cl)Br	C1=CC2=C(C=C(C=C2N=C1)Br)Br
-6.825725	-2.5497582	3.121538	4.2759666	1.1544287	COc1c(Br)cc(N(=O)=O)c(C)c1Br	COC1=C(C=C(C=C1)Br)Br
-6.297593	-1.8819035	3.1023955	4.4156895	1.3132939	C1=CC(=C(C(=C1Br)Cl)Cl)Br	C1=CSC(=C1Br)C2=C(C=CS2)Br
-6.700438	-1.5744494	3.6732917	5.1259885	1.4526968	CC1=C(C=C(C(=N1)C)Br)Br	CC1=NC(=CC(=C1)Br)Br
-5.9340243	-2.3125808	2.5257444	3.6214435	1.0956991	CC1=C(C=C(C=C1N)Br)Br	O=CC%73=CC(S%74)=C(S%73)C%75=C%74C(Br)=C(C(SC(C=O)=C%76)=C%76S%77)C%77=C%75Br
-6.1610847	-2.3770766	2.6570706	3.784008	1.1269374	C1=C(C(=CC(=C1Br)F)Br)[N+](=O)[O-]	CCOC1=C(N=C(C(=C1)N)Br)Br
-6.708256	-3.082962	2.9612203	3.6252937	0.66407347	C1(=C(C2=NSN=C2C(=C1F)Br)Br)F	BrC(C=N1)=CC2=C1C(N=CC(Br)=C1)=C1C1=NSN=C21
-5.868169	-1.1325482	3.2163558	4.7356205	1.5192647	C1=C(C=C(C(=C1Br)N)Br)OC(F)F	CC1=CC(=CC(=C1)Br)Br
-5.6009135	-1.9445487	2.5762763	3.656365	1.0800886	C1=CC(=C(C(=C1Br)N)N)Br	BrC%90=C(F)C%91=C(C(SC(Br)=C%92F)=C%92S%91)S%90
-6.2513437	-1.3049049	3.5450454	4.946439	1.4013934	C1CCOC(C1)COC2=C(C=C(C=C2)Br)Br	Fc1cc(Br)c(Br)cc1F
-6.2787013	-2.0954669	3.0923574	4.183234	1.0908768	C1=CC(=C(C=C1Br)N=C=S)Br	C1=CC2=C(C=C1Br)N=C(S2)Br
-5.7276254	-1.476706	2.9666092	4.2509193	1.2843101	C1=CC(=C(C=C1Br)N=C=S)Br	CC1=C(N=C(N1)Br)Br
-6.279918	-1.5006782	3.4530888	4.77924	1.3261514	C1C2=C(C=CC(=C2)Br)C3=C1C=C(C=C3)Br	CC1=C(C=CN=C1Br)Br
-6.0702295	-1.4766259	2.9881208	4.5936036	1.6054828	CC1=C(C(=C(C=C1Cl)Br)N)Br	C1=CC2=NC(=NN2C(=C1)Br)Br
-6.0559664	-2.5741954	2.537291	3.481771	0.94447994	CC1=CC(=C(C=C1Br)Br)OC	BrC1=C(N=C(C)C(C)=N2)C2=C(Br)C2=NC(C)=C(C)N=C12
-6.003828	-1.9566827	2.8007307	4.0471454	1.2464147	COC1=C(C=C(C2=C1N=CC=C2)Br)Br	O=S3(=O)c1ccc(Br)cc1c2cc(Br)ccc23
-6.8674192	-2.735787	2.682831	4.1316323	1.4488013	C1=C(C(=C(N=C1Br)Br)[N+](=O)[O-])N	N#CCS(=O)(C1=CC(Br)=CC=C1Br)=O
-5.9283757	-1.3960913	3.0908964	4.5322843	1.4413879	C1=CC(=C(C=C1Br)Br)CC#N	BrC1=C2OC(C)C(C)OC2=C(Br)S1
-6.3288097	-2.5931168	2.65438	3.735693	1.0813129	C1=CC2=NC(=NC=C2C=C1Br)Br	C1=C(N=C(C(=N1)Br)N)Br
-5.678988	-1.0780748	3.3130853	4.600913	1.2878277	CC1=CC(=C(C=C1Br)N)Br	COC1=CC(=C(C=C1Br)Br)OC
-6.121278	-2.0822222	2.6886787	4.039056	1.3503771	C1=CC2=C(C(=C1)Br)N=C(C=C2)Br	CN1C=C(C(=O)C(=C1)Br)Br
-6.6546764	-2.7577546	2.3346376	3.8969219	1.5622842	BrC%93=NN=C(Br)C=N%93	Brc2cccc(c1cccc(Br)n1)n2
-5.834134	-1.69121	2.665189	4.1429243	1.4777353	C1COC2=C(SC(=C2O1)Br)Br	CC1=CC(=C(N=C1Br)C)Br
-6.499137	-2.7481008	2.540451	3.7510362	1.2105851	C1=C(NC(=N1)Br)Br	C1=C(C=C(N=C1Br)Br)C=O
-6.482314	-2.8678336	2.579028	3.6144805	1.0354526	C1=C(C2=NNC(=C2C=N1)Br)Br	C1=C2C=C(C=NC2=C(C=C1[N+](=O)[O-])Br)Br
-6.3974175	-2.5313663	2.6268368	3.8660512	1.2392144	C1=C(C(=NC=C1Br)Br)C(F)(F)F	CC(=O)C1=C(SC(=C1)Br)Br
-6.347469	-1.419467	3.5194821	4.928002	1.4085197	CC1=C(C(=NC(=C1Br)C)C)Br	CC%45(OC)C%46=C(C=CC(Br)=C%46)C%47=C%45C=C(Br)C=C%47
-6.137516	-3.5947447	1.9360712	2.5427713	0.6067002	C1=CN2C(=N1)C(=CC(=N2)Br)Br	C1=CC2=C(C3=NSN=C3C(=C2C=C1)Br)Br
-6.398813	-2.8659658	2.3358097	3.532847	1.1970372	C1(=C(SC(=C1[N+](=O)[O-])Br)Br)[N+](=O)[O-]	CN(C)C1=NC=C(N=C1Br)Br
-6.1765056	-1.3697433	3.427332	4.806762	1.3794303	CCC1=C(C=CC(=C1)Br)Br	CC%45(OC)C%46=C(C=CC(Br)=C%46)C%47=C%45C=C(Br)C=C%47
-5.778693	-1.4520953	2.7976441	4.326598	1.528954	C1=C(C=C(C(=C1F)Br)F)Br	C1=C(C=C2C(=C1Br)C(=NN2)N)Br
-5.286961	-0.75655985	3.1552346	4.530401	1.3751667	C1=CNC2=C(C=C(C=C21)Br)Br	C1CC2=CC(=CC(=C2NC1)Br)Br
-7.1895666	-2.2289906	3.4984114	4.960576	1.4621646	C1=C(C=C(C(=C1Br)C#N)F)Br	O=C(O)c1cc(Br)cc(Br)c1
-5.873735	-1.8796428	2.8396544	3.994092	1.1544375	C1=CC2=C(C=CC3=C2C4=C1C=CC(=C4C=C3)Br)Br	COC1=C(C=C(C(=C1Br)N)Cl)Br
-6.4585004	-2.403789	2.8325808	4.0547113	1.2221305	C1=CC(=C(C=C1OC(F)(F)F)Br)Br	FC%71=NC%72C(Br)=CC=C(Br)C%72N=C%71F
-6.998414	-2.923155	2.783718	4.075259	1.2915411	CC1=CC(=C(C(=C1)Br)Cl)Br	O=C%57C%58=C(Br)SC(Br)=C%58C(C%57(F)F)=O
-7.0165596	-2.818357	2.7803502	4.1982026	1.4178524	C1=C(C=C(C(=C1Br)F)C=O)Br	C12=C(SC(=C1C(=O)OC2=O)Br)Br
-6.0145226	-1.9694023	2.5519888	4.0451202	1.4931314	CC(=O)C1=CC(=CC(=C1N)Br)Br	C1=C(C=NC(=N1)Br)Br
-6.792992	-2.2838645	2.7699733	4.5091276	1.7391543	CC(C)C1=CC(=CC(=C1Cl)Br)Br	C1=CC(=C(C=C1Br)Br)C=O
-5.7293434	-1.179253	3.2224493	4.5500903	1.327641	CC1=CC(=C(C(=C1)Br)[N+]#[C-])Br	CC1=CC(=CC(=C1N)Br)Br
-6.0725865	-2.05545	2.8026597	4.0171366	1.2144768	C1=CC(=C(C=C1Br)S)Br	BrC%94=NC=CC(/C=C/Br)=N%94
-6.471778	-2.2730849	2.9235692	4.1986933	1.2751241	C1=CC2=NC(=NC=C2C=C1Br)Br	N#CCS(=O)(C1=CC(Br)=CC=C1Br)=O
-7.0262856	-1.5467879	3.9107356	5.479498	1.5687623	C1=C(C=C(C(=C1Cl)Br)F)Br	CC1=C(C(=NC=C1Br)Cl)Br
-5.9358625	-1.477482	2.8954358	4.4583807	1.5629449	CC(=O)NC1=C(C=CC(=C1)Br)Br	CN1C=C(C=C(C1=O)Br)Br
-6.649483	-2.3966804	2.5735893	4.252803	1.6792135	CC1=CC(=CC(=C1F)Br)Br	BrC%93=NN=C(Br)C=N%93
-5.998386	-2.869647	2.2912092	3.1287389	0.83752966	O=C(Br)C%78=CC(S%79)=C(S%78)C%80=C%79C=C(C(SC(C(Br)=O)=C%81)=C%81S%82)C%82=C%80	BrC%93=NN=C(Br)C=N%93
-6.6879487	-2.2079546	2.9051962	4.479994	1.5747976	C1COC2=CC(=CC(=C2C1=O)Br)Br	Cc1cc(Br)cc(Br)c1[N+]#[C-]
-5.3718257	-1.7222662	2.5433965	3.6495595	1.106163	CC1=C(C=C(C(=O)N1C)Br)Br	BrC(S%16)=CC%17=C%16C(SC(Br)=C%18)=C%18N%17C
-6.015457	-1.2888217	3.2948287	4.7266355	1.4318068	CCC1=CC(=CC(=C1Cl)Br)Br	CC1=C(C=C(S1)Br)Br
-5.890837	-1.2824824	2.997299	4.6083546	1.6110556	CC1=C(C(=C(C=C1F)Br)N)Br	C1=C(C(=C(C(=N1)Br)N)N)Br
-6.3252535	-2.3103924	2.6920462	4.014861	1.322815	CC1=C(C=CC(=C1[N+](=O)[O-])Br)Br	CC1=C(C=C(C(=O)N1C)Br)Br
-5.5984645	-0.85606456	3.180809	4.7424	1.5615911	C1=C(C=C(C=C1Br)Br)CC#N	BrC%70=CC=C(Br)N%70C
-7.203516	-2.910628	2.9637027	4.2928877	1.329185	COc1c(Br)cc(N(=O)=O)c(C)c1Br	C1=C(C(=C(C=N1)Br)C#N)Br
-7.0622478	-2.5207083	2.8706834	4.541539	1.6708558	COCN1C(=NC(=N1)Br)Br	C1=CN=C(C(=C1Br)C=O)Br
-6.1662917	-1.5031905	3.0696287	4.663101	1.5934725	C1=C(C(=C(C(=C1Br)F)C#N)N)Br	C1=C(C=C(C=C1Br)Br)C#N
-6.037219	-2.4420645	2.4163325	3.5951545	1.178822	C1=CC(=C(C=C1Br)S)Br	BrC1=CC=C(Br)S1(=O)=O
-6.042657	-1.4181976	3.2229967	4.6244593	1.4014626	C1=C(C=C(C(=C1Br)N)OC(F)F)Br	C1=C(C(=C(C(=C1Br)Cl)Cl)N)Br
-5.9404316	-1.6503189	3.34332	4.2901125	0.9467926	C1=CC(=C(C=C1Br)Br)S	O=S3(=O)c1ccc(Br)cc1c2cc(Br)ccc23
-6.569807	-2.5517507	2.648635	4.0180564	1.3694215	C1=CN2C(=CN=C(C2=N1)Br)Br	C1(=C(C(=C(C(=C1F)F)Br)F)F)C2=C(C(=C(C(=C2F)F)Br)F)F
-6.6806865	-2.7224607	2.8570294	3.9582257	1.1011963	C1=C(C=C(N=C1Br)Br)[N+](=O)[O-]	C1=CC2=C(C(=C1)Br)OC3=C2C=CC=C3Br
-6.733708	-1.7029939	3.4157262	5.030714	1.6149879	C1(=C(N=C(N1)Br)Br)C(F)(F)F	COCN1C(=NC(=N1)Br)Br
-5.9241166	-1.8709351	2.7843888	4.0531816	1.2687929	C1=C(SC(=N1)Br)Br	C1CCOC(C1)COC2=C(C=C(C=C2)Br)Br
-6.6793985	-1.7760767	3.3462965	4.9033217	1.5570252	C1=CC(=NC(=C1Br)Cl)Br	C1=C(C(=C(C(=N1)Cl)Br)N)Br
-7.0382347	-2.8535254	2.8311243	4.1847095	1.3535852	C1=CC(=C(C=C1Br)Br)[N+](=O)[O-]	C1=CC=C2C(=C1)C(=NC(=N2)Br)Br
-6.354039	-1.8173444	3.0749245	4.5366945	1.46177	C1=C(N=C(C(=N1)Br)N)Br	CC1=C(C(=NC=C1Br)C)Br
-5.9915996	-1.4541061	3.1204884	4.5374937	1.4170053	C1=CC(=C(C=C1Br)N)Br	C1=CN=C(C=C1Br)C2=NC=CC(=C2)Br
-6.796824	-2.9330096	3.0187593	3.8638144	0.8450551	C1=CC(=C(C=C1Br)Br)Cl	C1(=C(C2=NSN=C2C(=C1F)Br)Br)F
-6.5269685	-2.1904557	3.2670155	4.3365126	1.0694971	C1=CC2=C(C=CN=C2C3=NC=CC(=C31)Br)Br	O=S3(=O)c1ccc(Br)cc1c2cc(Br)ccc23
-6.924311	-2.1451645	3.341998	4.7791467	1.4371486	CC1=CC(=NC(=C1)Br)Br	C1=C(C(=CN=C1Br)Br)C(F)(F)F
-6.4529433	-1.9473604	3.2612517	4.505583	1.2443311	CC1=CC(=C(C=C1Br)Cl)Br	C1=CC2=C(C=C1Br)N=C(S2)Br
-5.7922406	-0.8794154	3.3230615	4.912825	1.5897636	CC1=CC(=C(C=C1Br)Br)N	C1=C(C=C(C=C1Br)Br)CC#N
-6.7966566	-2.6845803	2.8343956	4.1120763	1.2776806	C1=C(C=C2C(=C1Br)N=CN=C2Cl)Br	BrC%94=NC=CC(/C=C/Br)=N%94
-7.1132145	-2.6257164	3.1221962	4.4874983	1.3653021	C1=CC(=C(C(=C1)Br)[N+](=O)[O-])Br	C1=C(C(=CC(=C1Br)Cl)Br)Cl
-6.1816616	-1.8260686	2.7338202	4.3555927	1.6217725	C1=C(C=NN=C1Br)Br	C1=C(C=C(C(=C1Br)N)Br)OC(F)F
-6.5872836	-1.264935	3.6415102	5.3223486	1.6808383	C1=C(C=C(C(=C1Br)F)Br)F	CCC1=CC(=CC(=C1)Br)Br
-6.679636	-1.5020254	3.46941	5.1776104	1.7082005	C1=C(C=C(C(=C1Br)F)F)Br	C1=C(C(=C(C(=N1)Cl)Br)N)Br
-5.660885	-1.99979	2.5158813	3.661095	1.1452136	C1=CC=C2C(=C1)C(=C3C=CC=CC3=C2Br)Br	C1COCCC12C3=C(C=CC(=C3)Br)C4=C2C=C(C=C4)Br
-6.067585	-2.886245	2.3238072	3.18134	0.85753274	CC1=C(C=CC(=C1Br)N)Br	O=C(N1)C2=C3C(C4=C(Br)C=C3C1=O)=C(C1=C3C(C5=CC=C34)=C(C(NC5=O)=O)C=C1Br)C=C2
-5.850151	-2.1262767	2.5860293	3.7238743	1.137845	C1=CC2=C(N=C(C=C2C=C1Br)N)Br	C1=C(C(=CN=C1Br)Br)F
-6.0595202	-1.4880716	3.2310722	4.571449	1.3403766	C1=CC=C2C(=C1)C(=CC=C2Br)Br	C1=C(C(=C(C(=C1Br)F)Br)N)Cl
-6.304634	-2.6376061	2.5435877	3.667028	1.1234403	C1=C(C=C(C(=C1Br)N=C=S)OC(F)(F)F)Br	C1=CC2=C(C=C1Br)C3=CC(=CC(=C3N2)[N+](=O)[O-])Br
-6.479915	-2.532199	2.9328885	3.9477162	1.0148277	C1=CC=C(C=C1)C2=C(C=C(C=C2)Br)Br	C12=C(SC(=C1C(=O)OC2=O)Br)Br
-6.0737076	-1.5663717	2.91101	4.5073357	1.5963256	C1=CC2=NC(=NN2C=C1Br)Br	C1=C(C=C(C(=C1Br)N)Br)C(F)(F)F
-6.6623588	-3.240011	2.0383825	3.4223478	1.3839653	C1=CC2=C(C=C1Br)C(=O)C(=O)C3=C2C=CC(=C3)Br	C1=C2C=C(C=NC2=C(C=C1[N+](=O)[O-])Br)Br
-5.930675	-1.4750904	2.948993	4.4555845	1.5065916	C1=C(C2=NC=C(N2C=C1Cl)Br)Br	CC1=CC(=C(C=C1Br)C)Br
-6.440934	-1.7602291	3.3872647	4.680705	1.2934403	C1=C(C=C(C=C1Br)Br)OC(F)(F)F	C1CC(=O)NC2=C(C=C(C=C21)Br)Br
-5.648424	-1.4035494	2.8614569	4.244875	1.3834181	CN1C=C(N=C1Br)Br	CC1=C(N=C(S1)Br)Br
-5.944547	-1.9060383	3.1094854	4.038509	0.9290235	C1=CC2=CC(=CC3=C2C4=C(C=C3)C=C(C=C41)Br)Br	C1=CC(=C(C=C1Br)Br)N=C=S
-6.232534	-2.5706177	2.6273143	3.6619163	1.0346019	CC1=C(C(=NC=C1Br)Br)[N+](=O)[O-]	CC1=CC(=C(C(=C1N)Br)F)Br
[truncated: 347,169 more rows]
