# Supplementary material for: Mapping binary copolymer property space with neural networks
Source: Chem Sci. 2019 Apr 1;10(19):4973–84. doi: 10.1039/c8sc05710a (PMC6530542; doi:10.1039/c8sc05710a)
Supplement: Supplementary file 3 [file SC-010-C8SC05710A-s003.csv]

TRIMER	Excitation Energy (eV)	IP (eV)	EA (eV)	Calib. IP (eV)	Calib. EA (eV)	Calib. Excitation Energy (eV)
[H]C1=C([H])C(C2C([H])=C(F)C(=C([H])C=2Cl)C2=C([H])C([H])=C3C(=C2[H])C([H])([H])C(=O)N3[H])=C2C(=C1[H])C([H])([H])C(=O)N2[H]	3.4054800000000003	6.352397	1.4813679999999998	6.33028127	0.6680585599999995	3.3713484000000005
[H]C1=C([H])C(C2=C([H])C(Cl)=C(C([H])=C2F)C2=C([H])C([H])=C3C(=C2[H])C([H])([H])C(=O)N3[H])=C2C(=C1[H])C([H])([H])C(=O)N2[H]	3.3681300000000003	6.319819000000002	1.484588	6.3006352900000016	0.6710209599999999	3.3403479000000003
[H]C1=NC(C#N)=C(C2C([H])=C3C(=O)C(=O)N([H])C3=C(C3=NC(C#N)=C([H])N3C([H])([H])[H])C=2[H])N1C([H])([H])[H]	1.88575	6.585175	3.063124	6.542109249999999	2.12327408	2.1099725
[H]C1=NC(C#N)=C(C2C([H])=C(C3=NC(C#N)=C([H])N3C([H])([H])[H])C([H])=C3C(=O)C(=O)N([H])C=23)N1C([H])([H])[H]	1.8633400000000002	6.608288999999999	3.064964	6.563142989999999	2.1249668799999997	2.0913722000000003
[H]C(=O)C1=C([H])C(C2N=C([H])C3=C([H])C([H])=C([H])C([H])=C3N=2)=C([H])C(C2=NC([H])=NC3=C([H])C([H])=C([H])C([H])=C23)=C1OC([H])(C([H])([H])[H])C([H])([H])[H]	2.84523	6.6948300000000005	2.420412	6.6418953	1.5319790399999995	2.9063409
[H]C(=O)C1=C([H])C(C2=NC([H])=NC3=C([H])C([H])=C([H])C([H])=C23)=C([H])C(C2N=C([H])C3=C([H])C([H])=C([H])C([H])=C3N=2)=C1OC([H])(C([H])([H])[H])C([H])([H])[H]	2.88673	6.684456	2.40422	6.6324549600000005	1.5170823999999996	2.9407859000000003
[H]C(=O)C1=C([H])C([H])=C([H])C(=C1[H])C1C([H])=C(Cl)C(F)=C(C2C([H])=C([H])C([H])=C([H])C=2C([H])=O)C=1N([H])[H]	2.88009	6.267039	2.13926	6.25260549	1.2733192000000004	2.9352747
[H]C(=O)C1=C([H])C([H])=C([H])C(=C1[H])C1=C(F)C(Cl)=C([H])C(C2C([H])=C([H])C([H])=C([H])C=2C([H])=O)=C1N([H])[H]	2.75725	6.2587579999999985	2.137604	6.245069779999999	1.2717956800000003	2.8333175
[H]C1=C(F)C([H])=C(C(F)=C1C1C([H])=C(C(=O)Cl)C(=C([H])C=1C(=O)Cl)C1C(F)=C([H])C([H])=C(F)C=1[N+](=O)[O-])[N+](=O)[O-]	3.17972	7.770722999999999	3.4307559999999997	7.620957929999999	2.4614955199999997	3.1839676000000003
[H]C1=C(F)C([H])=C(C(F)=C1C1=C([H])C(C(=O)Cl)=C(C([H])=C1C(=O)Cl)C1C(F)=C([H])C([H])=C(F)C=1[N+](=O)[O-])[N+](=O)[O-]	3.0427699999999995	7.792654	3.4096879999999996	7.64091514	2.4421129599999993	3.0702990999999997
[H]C1=NC([H])=C(C(C2=NC([H])=C(C3=NC([H])=C(C([H])=C3[H])[N+](=O)[O-])C(=N2)C([H])([H])[H])=C1[H])[N+](=O)[O-]	2.86515	7.244561	3.14298	7.1421505100000005	2.1967416	2.9228745
[H]C1=NC([H])=C(C(=C1[H])C1C(=NC(=NC=1[H])C1=NC([H])=C(C([H])=C1[H])[N+](=O)[O-])C([H])([H])[H])[N+](=O)[O-]	2.82946	7.393437	3.1229240000000003	7.277627669999999	2.17829008	2.8932518000000003
[H]C1=C([H])C(=C(C2C([H])=C([H])C(=C(Cl)C=2F)C2=C([H])C(=C([H])C(=C2[H])C([H])([H])C([H])([H])[H])C([H])([H])C([H])([H])[H])C(=C1[H])C([H])([H])C([H])([H])[H])C([H])([H])C([H])([H])[H]	3.68104	6.733414	1.209048	6.6770067399999995	0.41752416000000014	3.6000632
[H]C1=C([H])C(=C(C2C([H])=C([H])C(=C(F)C=2Cl)C2=C([H])C(=C([H])C(=C2[H])C([H])([H])C([H])([H])[H])C([H])([H])C([H])([H])[H])C(=C1[H])C([H])([H])C([H])([H])[H])C([H])([H])C([H])([H])[H]	3.75159	6.707661	1.2037120000000003	6.65357151	0.4126150400000004	3.6586197
[H]C1=NC(OC([H])([H])[H])=C(C([H])=C1C1C([H])=C([H])C([H])=C(OC([H])([H])[H])C=1[H])C1C([H])=C([H])C([H])=C([H])C=1OC([H])([H])[H]	3.33908	6.05328	1.260752	6.0580848	0.46509184000000037	3.3162364
[H]C1=NC(OC([H])([H])[H])=C(C([H])=C1C1C([H])=C([H])C([H])=C([H])C=1OC([H])([H])[H])C1C([H])=C([H])C([H])=C(OC([H])([H])[H])C=1[H]	3.3249699999999995	6.095049	1.2088640000000002	6.09609459	0.4173548800000004	3.3045250999999998
[H]C1C([H])=C([H])C(C2=C([H])C(F)=C(C([H])=C2F)C2C([H])=C([H])C(C(=O)OC([H])([H])[H])=C([H])C=2[H])=C(C(=O)OC([H])([H])[H])C=1[H]	3.62294	6.936344	2.013496	6.8616730399999994	1.1576163199999998	3.5518402
[H]C1C([H])=C([H])C(C2C([H])=C(F)C(=C([H])C=2F)C2C([H])=C([H])C(C(=O)OC([H])([H])[H])=C([H])C=2[H])=C(C(=O)OC([H])([H])[H])C=1[H]	3.57812	6.9325220000000005	1.982308	6.85819502	1.12892336	3.5146396
[H]C1C([H])=C([H])C(=C(N=C=S)C=1[H])C1C([H])=C2SC(Cl)=NC2=C(C=1[H])C1C([H])=C([H])C([H])=C(N=C=S)C=1[H]	3.30837	6.385521	2.084612	6.36042411	1.2230430399999994	3.2907471
[H]C1C([H])=C([H])C(=C(N=C=S)C=1[H])C1C([H])=C(C([H])=C2SC(Cl)=NC=12)C1C([H])=C([H])C([H])=C(N=C=S)C=1[H]	3.2942599999999995	6.3789690000000006	2.11488	6.35446179	1.2508895999999998	3.2790358
[H]C1N=C2C([H])=C(C([H])=C([H])C2=C([H])C=1[H])C1C([H])=C(C([H])=C(Cl)C=1Cl)C1C([H])=C([H])N=C2C([H])=C([H])C([H])=C([H])C=12	3.2461199999999995	6.658157000000001	2.008068	6.608522870000001	1.1526225600000002	3.2390795999999997
[H]C1N=C2C([H])=C(C([H])=C([H])C2=C([H])C=1[H])C1C([H])=C(Cl)C(Cl)=C(C=1[H])C1C([H])=C([H])N=C2C([H])=C([H])C([H])=C([H])C=12	3.3839	6.673081	2.054712	6.622103709999999	1.1955350400000002	3.3534370000000004
[H]C1=NC(C#N)=C(C([H])=C1C1C([H])=C([H])C([H])=C([H])C=1C([H])(C([H])([H])[H])C([H])([H])[H])C1C([H])=C([H])C([H])=C(C=1[H])C([H])(C([H])([H])[H])C([H])([H])[H]	3.5474099999999997	6.806305	2.006596	6.74333755	1.1512683199999998	3.4891503
[H]C1=NC(C#N)=C(C([H])=C1C1C([H])=C([H])C([H])=C(C=1[H])C([H])(C([H])([H])[H])C([H])([H])[H])C1C([H])=C([H])C([H])=C([H])C=1C([H])(C([H])([H])[H])C([H])([H])[H]	3.62294	6.7976600000000005	1.971912	6.735470600000001	1.11935904	3.5518402
[H]C(=O)C1=C([H])C([H])=C([H])C(=C1[H])C1=C(SC(C2C([H])=C([H])C([H])=C([H])C=2C([H])=O)=C1C([H])([H])[H])C([H])([H])[H]	2.8037300000000003	6.029074	1.97412	6.036057339999999	1.1213904000000001	2.8718959
[H]C(=O)C1=C([H])C([H])=C([H])C(=C1[H])C1SC(=C(C2C([H])=C([H])C([H])=C([H])C=2C([H])=O)C=1C([H])([H])[H])C([H])([H])[H]	2.65765	6.047729	2.0116560000000003	6.05303339	1.15592352	2.7506494999999997
[H]C1=C([H])C(=C(C(Cl)=C1C1C([H])=C(C([H])=C(F)C=1Cl)C1=C([H])C([H])=C(Cl)C(=C1N([H])[H])C([H])([H])[H])C([H])([H])[H])N([H])[H]	3.40797	6.164846000000002	1.3263479999999994	6.1596098600000015	0.5254401599999996	3.3734151000000003
[H]C1=C([H])C(=C(C(Cl)=C1C1C([H])=C(F)C(Cl)=C(C=1[H])C1=C([H])C([H])=C(Cl)C(=C1N([H])[H])C([H])([H])[H])C([H])([H])[H])N([H])[H]	3.3241400000000003	6.192783	1.368576	6.185032530000001	0.5642899200000002	3.3038362
[H]C1=NC([H])=C(C2=C([H])C(=C(C3=NC([H])=C([H])C(=C3[N+](=O)[O-])C([H])([H])[H])C([H])=C2C([H])([H])[H])[N+](=O)[O-])C(=C1[N+](=O)[O-])C([H])([H])[H]	2.99878	7.47015	2.900744	7.347436500000001	1.9738844799999997	3.0337874000000005
[H]C1=NC([H])=C(C2C([H])=C(C(C3=NC([H])=C([H])C(=C3[N+](=O)[O-])C([H])([H])[H])=C([H])C=2[N+](=O)[O-])C([H])([H])[H])C(=C1[N+](=O)[O-])C([H])([H])[H]	3.03364	7.537217	3.0022200000000003	7.40846747	2.0672424000000005	3.0627212000000004
[H]C1=NC(=C([H])N=C1Cl)C1C([H])=C2SC(Cl)=NC2=C(C2=NC([H])=C([H])N=C2Cl)C=1[H]	3.14901	6.8475280000000005	2.541944	6.780850480000001	1.64378848	3.1584783000000005
[H]C1=NC(=C([H])N=C1Cl)C1C([H])=C(C2=NC([H])=C([H])N=C2Cl)C([H])=C2SC(Cl)=NC=12	3.19715	6.79311	2.461076	6.731330100000001	1.5693899199999999	3.1984345000000003
[H]C(=O)C1C(=NC([H])=C([H])C=1[H])C1=C([H])C(C2C([H])=C([H])N=C([H])C=2C([H])=O)=C2C(=C1[H])C(C(=O)N2[H])(C([H])([H])[H])C([H])([H])[H]	2.5215300000000003	6.593456	2.353988	6.54964496	1.4708689599999998	2.6376699000000006
[H]C(=O)C1C(=NC([H])=C([H])C=1[H])C1C([H])=C(C([H])=C2C=1N([H])C(=O)C2(C([H])([H])[H])C([H])([H])[H])C1C([H])=C([H])N=C([H])C=1C([H])=O	2.8112	6.612292999999999	2.267784	6.566786629999999	1.3915612799999995	2.878096
[H]C1=NC([H])=C(C2=NSN=C12)C1C([H])=C([H])C(C2=NC([H])=C([H])C3=NSN=C32)=C([H])C=1N([H])[H]	2.27585	5.905405	3.2082080000000004	5.92351855	2.25675136	2.4337555
[H]C1=NC([H])=C(C2=NSN=C12)C1C([H])=C([H])C(C2=NC([H])=C([H])C3=NSN=C32)=C(C=1[H])N([H])[H]	2.43355	5.967467	3.296528	5.97999497	2.3380057599999997	2.5646465000000003
[H]C1=C([H])C(C2=NC(C3C([H])=C([H])C([H])=C([H])C=3N([H])[H])=C(S2)C([H])([H])[H])=C([H])C(=C1[H])N([H])[H]	2.78215	5.631586	1.5070359999999998	5.6743432600000006	0.6916731199999999	2.8539845
[H]C1=C([H])C(=C([H])C(=C1[H])N([H])[H])C1N=C(SC=1C([H])([H])[H])C1C([H])=C([H])C([H])=C([H])C=1N([H])[H]	2.79543	5.614933000000001	1.5674799999999998	5.65918903	0.7472816	2.8650069
[H]C1=NC(=C(C2=NC([H])=C([H])C3=C([H])C([H])=C([H])C([H])=C23)C([H])=C1C1N=C([H])C2=C([H])C([H])=C([H])C([H])=C2C=1[H])N([H])[H]	2.9606	5.942897	1.7365759999999997	5.95763627	0.9028499199999995	3.002098
[H]C1=NC(=C(C([H])=C1C1=NC([H])=C([H])C2=C([H])C([H])=C([H])C([H])=C12)C1N=C([H])C2=C([H])C([H])=C([H])C([H])=C2C=1[H])N([H])[H]	2.80871	5.866548000000001	1.7291239999999997	5.888158680000001	0.8959940799999995	2.8760293
[H]C1=C([H])C(=C(C#N)C(F)=C1C1=C(Cl)N=C(C(=C1[H])C1=C([H])C([H])=C(F)C(C#N)=C1N([H])[H])N([H])[H])N([H])[H]	2.97056	6.051551	1.521204	6.05651141	0.7047076800000003	3.0103648
[H]C1=C([H])C(=C(C#N)C(F)=C1C1C(=NC(Cl)=C(C=1[H])C1=C([H])C([H])=C(F)C(C#N)=C1N([H])[H])N([H])[H])N([H])[H]	3.0851	6.110064	1.5739200000000002	6.109758240000001	0.7532063999999998	3.1054330000000006
[H]C1=C([H])C([H])=C(C(=S)N([H])C2C([H])=C(C([H])=C([H])C=2[H])C2C([H])=C(Cl)C(=C(C=2Cl)C2C([H])=C([H])C([H])=C([H])C=2N([H])C(=S)C2C([H])=C([H])C([H])=C([H])C=2[H])N([H])[H])C([H])=C1[H]	2.26838	6.0112380000000005	2.244232	6.01982658	1.3698934399999994	2.4275554
[H]C1=C([H])C([H])=C(C(=S)N([H])C2C([H])=C(C([H])=C([H])C=2[H])C2C(Cl)=C(C([H])=C(Cl)C=2N([H])[H])C2C([H])=C([H])C([H])=C([H])C=2N([H])C(=S)C2C([H])=C([H])C([H])=C([H])C=2[H])C([H])=C1[H]	2.31901	6.1270809999999996	2.328504	6.1252437099999995	1.44742368	2.4695783000000002
[H]C1N=C(C(Cl)=C([H])C=1C1C([H])=C(C(=O)Cl)C([H])=C([H])C=1C(=O)Cl)C1=C([H])C(C(=O)Cl)=C([H])C([H])=C1C(=O)Cl	3.32995	7.4119100000000016	3.0884240000000003	7.294438100000002	2.14655008	3.3086585
[H]C1N=C(C(Cl)=C([H])C=1C1=C([H])C(C(=O)Cl)=C([H])C([H])=C1C(=O)Cl)C1C([H])=C(C(=O)Cl)C([H])=C([H])C=1C(=O)Cl	3.09921	7.416368999999999	3.298	7.298495789999999	2.33936	3.1171443
[H]C1=NN=C(C([H])=C1C1C([H])=C([H])N=C(C=1[H])N([H])[H])C1N=C(C([H])=C([H])C=1[H])N([H])[H]	2.7614	6.297433	2.1273	6.28026403	1.2623160000000002	2.8367620000000002
[H]C1=NN=C(C([H])=C1C1N=C(C([H])=C([H])C=1[H])N([H])[H])C1C([H])=C([H])N=C(C=1[H])N([H])[H]	2.85021	6.31081	2.064648	6.2924371	1.20467616	2.9104743
[H]C1N=C(OC([H])([H])[H])C(C2=NC([H])=C(C([H])=C2C(F)(F)F)C2=C([H])N=C(OC([H])([H])[H])C([H])=C2OC([H])([H])[H])=C(OC([H])([H])[H])C=1[H]	3.42457	6.722221	1.845412	6.666821110000001	1.0029790399999996	3.3871931
[H]C1N=C(OC([H])([H])[H])C(=C(OC([H])([H])[H])C=1[H])C1=C([H])N=C(C2=C([H])N=C(OC([H])([H])[H])C([H])=C2OC([H])([H])[H])C(=C1[H])C(F)(F)F	3.52085	6.816315	1.9793639999999997	6.75244665	1.1262148799999991	3.4671054999999997
[H]C1SC(C2=NC(=NN2C([H])([H])OC([H])([H])[H])C2SC([H])=C(C(=O)C([H])([H])[H])C=2[H])=C(C(=O)C([H])([H])[H])C=1[H]	2.7198999999999995	6.430293	2.1792800000000003	6.40116663	1.3101376	2.8023169999999995
[H]C1SC(C2=NN(C(=N2)C2SC([H])=C(C(=O)C([H])([H])[H])C=2[H])C([H])([H])OC([H])([H])[H])=C(C(=O)C([H])([H])[H])C=1[H]	2.8693	6.52466	2.222888	6.4870406	1.3502569600000003	2.9263190000000003
[H]C1=C([H])C(=C([H])C(=C1N=C=S)C1=C(F)C([H])=C(F)C([H])=C1N([H])[H])C1C(F)=C([H])C(=C([H])C=1F)N([H])[H]	3.3623199999999995	6.028983	1.589836	6.035974530000001	0.7678491200000002	3.3355255999999995
[H]C1=C([H])C(=C([H])C(=C1N=C=S)C1C(F)=C([H])C(=C([H])C=1F)N([H])[H])C1=C(F)C([H])=C(F)C([H])=C1N([H])[H]	3.37892	6.066293	1.6361119999999998	6.069926629999999	0.8104230399999999	3.3493036
[H]C1N=C(OC([H])([H])[H])C2C(=NN([H])C=2C2C([H])=C([H])C(F)=C([H])C=2[H])C=1C1C([H])=C([H])C([H])=C([H])C=1F	2.89171	6.126989999999998	1.82278	6.125160899999998	0.9821575999999999	2.9449193
[H]C1N=C(OC([H])([H])[H])C2C(=NN([H])C=2C2C([H])=C([H])C([H])=C([H])C=2F)C=1C1C([H])=C([H])C(F)=C([H])C=1[H]	2.92491	6.149376	1.7828519999999997	6.14553216	0.9454238399999992	2.9724753
[H]C(=O)C1C(=NC([H])=C([H])C=1C1=C([H])N=C(F)C([H])=C1C([H])([H])[H])C1C(F)=NC([H])=C([H])C=1C([H])([H])[H]	2.5123999999999995	7.087222	2.4999	6.99897202	1.6051079999999995	2.630092
[H]C(=O)C1C(=NC([H])=C([H])C=1C1C(F)=NC([H])=C([H])C=1C([H])([H])[H])C1=C([H])N=C(F)C([H])=C1C([H])([H])[H]	2.67342	7.104875999999999	2.511216	7.0150371599999986	1.6155187199999999	2.7637386000000004
[H]C1=C([H])C(C2C([H])=C(C([H])=C(C=2N([H])[H])[N+]([O-])=NC(C([H])([H])[H])(C([H])([H])[H])C([H])([H])[H])C2C([H])=C([H])C([H])=C(C=2C([H])([H])[H])[N+](=O)[O-])=C(C(=C1[H])C([H])([H])[H])[N+](=O)[O-]	2.6070199999999994	6.389069999999999	2.431084	6.3636536999999995	1.54179728	2.7086265999999997
[H]C1=C([H])C(C2=C([H])C(C3C([H])=C([H])C([H])=C(C=3C([H])([H])[H])[N+](=O)[O-])=C(C(=C2[H])[N+]([O-])=NC(C([H])([H])[H])(C([H])([H])[H])C([H])([H])[H])N([H])[H])=C(C(=C1[H])C([H])([H])[H])[N+](=O)[O-]	2.54394	6.362316000000001	2.4458960000000003	6.339307560000001	1.5554243200000002	2.6562702000000002
[H]C(=O)C1=C([H])C(=C([H])C(=C1OC([H])(C([H])([H])[H])C([H])([H])[H])C1C([H])=C(C(=C([H])C=1F)N([H])[H])C([H])([H])[H])C1C(F)=C([H])C([H])=C(C=1N([H])[H])C([H])([H])[H]	2.67176	6.07239	1.9514880000000001	6.075474900000001	1.1005689600000004	2.7623608
[H]C(=O)C1=C([H])C(=C([H])C(=C1OC([H])(C([H])([H])[H])C([H])([H])[H])C1C(F)=C([H])C([H])=C(C=1N([H])[H])C([H])([H])[H])C1C([H])=C(C(=C([H])C=1F)N([H])[H])C([H])([H])[H]	2.7381599999999997	6.034716	1.999236	6.041191560000001	1.1444971199999996	2.8174728
[H]C1C([H])=C([H])C(=C(N=C=S)C=1[H])C1=C([H])C(F)=C(C([H])=C1[N+](=O)[O-])C1C([H])=C([H])C([H])=C(N=C=S)C=1[H]	3.08427	6.687914	2.6344959999999995	6.63560174	1.7289363199999994	3.1047441000000005
[H]C1C([H])=C([H])C(=C(N=C=S)C=1[H])C1C([H])=C(C(=C([H])C=1F)C1C([H])=C([H])C([H])=C(N=C=S)C=1[H])[N+](=O)[O-]	2.79294	6.669623	2.634404	6.6189569299999995	1.72885168	2.8629402000000006
[H]C1=NC2C([H])=C(C3=NC(=NN3[H])C3=NC4C([H])=C([H])C([H])=C([H])C=4C([H])=C3[H])C([H])=C([H])C=2C([H])=C1[H]	3.1066800000000003	6.60019	2.0631759999999995	6.555772899999999	1.2033219199999996	3.1233444000000006
[H]C1=NC2C([H])=C(C3=NN([H])C(=N3)C3=NC4C([H])=C([H])C([H])=C([H])C=4C([H])=C3[H])C([H])=C([H])C=2C([H])=C1[H]	3.09257	6.6220300000000005	1.975132	6.5756473	1.1223214400000003	3.1116330999999997
[H]C1=NN2C(=N1)C(=NC(C1C([H])=C([H])C(=C([H])C=1F)[N+](=O)[O-])=C2[H])C1C(F)=C([H])C([H])=C([H])C=1[N+](=O)[O-]	2.89586	7.2571189999999985	2.97048	7.153578289999999	2.0380415999999997	2.9483638
[H]C1=NN2C(=N1)C(=NC(C1C(F)=C([H])C([H])=C([H])C=1[N+](=O)[O-])=C2[H])C1C([H])=C([H])C(=C([H])C=1F)[N+](=O)[O-]	2.9464900000000003	7.283144999999998	2.973792	7.177261949999998	2.04108864	2.9903867
[H]C(=O)C1C([H])=C([H])C(=C([H])C=1[H])C1C([H])=C2OC(F)(F)OC2=C(C2C([H])=C([H])C([H])=C([H])C=2C([H])=O)C=1N([H])[H]	2.7149199999999998	6.245836	2.279744	6.23331076	1.4025644799999997	2.7981835999999998
[H]C(=O)C1C([H])=C([H])C(=C([H])C=1[H])C1=C2OC(F)(F)OC2=C([H])C(C2C([H])=C([H])C([H])=C([H])C=2C([H])=O)=C1N([H])[H]	2.6286	6.2418320000000005	2.269256	6.22966712	1.3929155199999999	2.726538
[H]C1N=C(C(F)=C([H])C=1C1C([H])=C(OC(F)(F)F)C([H])=C([H])C=1[H])C1C([H])=C([H])C(OC(F)(F)F)=C([H])C=1[H]	3.40797	6.793292	1.969336	6.73149572	1.1169891200000004	3.3734151000000003
[H]C1N=C(C(F)=C([H])C=1C1C([H])=C([H])C(OC(F)(F)F)=C([H])C=1[H])C1C([H])=C(OC(F)(F)F)C([H])=C([H])C=1[H]	3.40797	6.800389999999999	1.937412	6.737954899999999	1.0876190399999999	3.3734151000000003
[H]C1=NN=C(C2=NN(C(=N2)C2C([H])=NN=C([H])C=2[H])C2([H])OC([H])([H])C([H])([H])C([H])([H])C2([H])[H])C([H])=C1[H]	2.67342	6.960641000000001	2.2437720000000003	6.88378331	1.36947024	2.7637386000000004
[H]C1=NN=C(C2=NC(=NN2C2([H])OC([H])([H])C([H])([H])C([H])([H])C2([H])[H])C2C([H])=NN=C([H])C=2[H])C([H])=C1[H]	2.53481	6.934251	2.2481880000000003	6.859768409999999	1.3735329600000004	2.6486923
[H]C1N=C(Cl)C(=NC=1C1C([H])=C([H])C([H])=C([H])C=1[N+](=O)[O-])C1C([H])=C([H])C([H])=C(C=1[H])[N+](=O)[O-]	3.13158	7.198424	2.8513399999999995	7.100165840000001	1.9284327999999995	3.1440114
[H]C1N=C(Cl)C(=NC=1C1C([H])=C([H])C([H])=C(C=1[H])[N+](=O)[O-])C1C([H])=C([H])C([H])=C([H])C=1[N+](=O)[O-]	3.14071	7.210617999999999	2.894672	7.111262379999999	1.9682982399999998	3.1515893000000004
[H]C1=NC(C2C([H])=C(C#N)C(F)=C(C3=NC([H])=C(N3[H])C(F)(F)F)C=2[H])=C(N1[H])C(F)(F)F	3.17391	6.685002000000001	1.8269200000000003	6.632951820000001	0.9859664000000006	3.1791453
[H]C1=NC(C2C([H])=C(C3=NC([H])=C(N3[H])C(F)(F)F)C([H])=C(C#N)C=2F)=C(N1[H])C(F)(F)F	3.13158	6.69574	1.786072	6.6427233999999995	0.9483862399999996	3.1440114
[H]C1=NC(=C(N=C1Cl)N([H])[H])C1=C(C(=NN1[H])C1=NC([H])=C(N=C1Cl)N([H])[H])[N+](=O)[O-]	2.8029	6.953542999999999	2.887588	6.877324129999999	1.96178096	2.871207
[H]C1=NC(C2=NN([H])C(C3=NC([H])=C(N=C3Cl)N([H])[H])=C2[N+](=O)[O-])=C(N=C1Cl)N([H])[H]	2.65765	7.034624000000001	3.0210799999999995	6.951107840000001	2.0845936	2.7506494999999997
[H]C1=C([H])C(=C(Cl)C(=C1[H])C([H])([H])C([H])([H])[H])C1C([H])=C(Cl)C(=C(C=1F)C1=C([H])C([H])=C(Cl)C(=C1[H])C([H])([H])C([H])([H])[H])N([H])[H]	3.4038199999999996	6.24802	1.2656279999999995	6.235298200000001	0.46957775999999907	3.3699706
[H]C1=C([H])C(=C(Cl)C(=C1[H])C([H])([H])C([H])([H])[H])C1C(F)=C(C([H])=C(Cl)C=1N([H])[H])C1=C([H])C([H])=C(Cl)C(=C1[H])C([H])([H])C([H])([H])[H]	3.39718	6.2511139999999985	1.2894560000000004	6.238113739999998	0.4914995200000005	3.3644594000000003
[H]C1N=C(C([H])=C2C([H])=C(C3=NC([H])=C(C4N=C(C([H])=C5C([H])=C([H])C([H])=C([H])C=45)N([H])[H])C(=C3[H])N([H])[H])C([H])=C([H])C=12)N([H])[H]	2.69915	5.733961	1.7828519999999997	5.76750451	0.9454238399999992	2.7850945
[H]C1N=C(C([H])=C2C([H])=C(C([H])=C([H])C=12)C1=C([H])N=C(C([H])=C1N([H])[H])C1N=C(C([H])=C2C([H])=C([H])C([H])=C([H])C=12)N([H])[H])N([H])[H]	2.67093	5.711848000000001	1.894448	5.74738168	1.0480921599999995	2.7616719
[H]C1=C([H])C(=C([H])C(C2=C([H])C(Cl)=C(C([H])=C2F)C2=C([H])C(=C([H])C([H])=C2C([H])([H])[H])N([H])[H])=C1N([H])[H])C([H])([H])[H]	3.3955199999999994	5.934069999999999	1.1897279999999997	5.949603699999999	0.39974975999999973	3.3630815999999997
[H]C1=C([H])C(=C([H])C(C2C([H])=C(F)C(=C([H])C=2Cl)C2=C([H])C(=C([H])C([H])=C2C([H])([H])[H])N([H])[H])=C1N([H])[H])C([H])([H])[H]	3.36315	5.908681	1.0964400000000003	5.92649971	0.31392480000000056	3.3362145
[H]C(=O)C1C([H])=C([H])C(=C([H])C=1C1C([H])=C([H])C([H])=C([H])C=1N([H])[H])C1C([H])=C([H])C([H])=C(C=1[H])N([H])[H]	2.91744	5.9711979999999985	1.991784	5.983390179999999	1.1376412799999995	2.9662752
[H]C(=O)C1C([H])=C([H])C(=C([H])C=1C1C([H])=C([H])C([H])=C(C=1[H])N([H])[H])C1C([H])=C([H])C([H])=C([H])C=1N([H])[H]	2.87926	6.020065	2.041556	6.027859149999999	1.18343152	2.9345858
[H]C1C([H])=C([H])C(C2=NN3C(=N2)C([H])=C(C([H])=C3[H])C2C([H])=C([H])C([H])=C(N=C=S)C=2[H])=C(N=C=S)C=1[H]	3.17889	6.379333	1.874668	6.35479303	1.0298945599999998	3.1832787000000002
[H]C1C([H])=C([H])C(=C(N=C=S)C=1[H])C1=C([H])C2=NC(=NN2C([H])=C1[H])C1C([H])=C([H])C([H])=C(N=C=S)C=1[H]	3.23118	6.3259159999999985	1.927016	6.306183559999999	1.07805472	3.2266794
[H]C1C(=O)N(C([H])=C(C=1[H])C1=C([H])C(=C(F)C(C#N)=C1N([H])[H])C1C(=O)N(C([H])=C([H])C=1[H])C([H])([H])[H])C([H])([H])[H]	2.75559	5.941077	1.6311440000000001	5.95598007	0.8058524799999995	2.8319397000000004
[H]C1C(=O)N(C([H])=C(C=1[H])C1C([H])=C(C2C(=O)N(C([H])=C([H])C=2[H])C([H])([H])[H])C(=C(C#N)C=1F)N([H])[H])C([H])([H])[H]	2.9855	5.956456	1.4812759999999998	5.96997496	0.6679739199999997	3.022765
[H]C1=NN2C(=N1)C(=NC(C1=C([H])C([H])=C(C(=C1[H])C([H])([H])[H])[N+](=O)[O-])=C2[H])C1C([H])=C([H])C([H])=C(C=1[N+](=O)[O-])C([H])([H])[H]	2.8527	7.095047999999999	2.85502	7.006093679999999	1.9318184	2.912541
[H]C1=NN2C(=N1)C(=NC([H])=C2[H])C1=C([H])C(C2N=C([H])C3=NC([H])=NN3C=2[H])=C(C(=C1[H])C([H])([H])[H])[N+](=O)[O-]	3.13822	7.052823999999998	2.64986	6.967669839999999	1.7430711999999997	3.1495226
[H]C1=NC2=C(C([H])=C(OC([H])([H])[H])C(C3C(=NC(F)=C([H])C=3[H])C([H])([H])[H])=C2C([H])=C1[H])C1=C(F)N=C(C([H])=C1[H])C([H])([H])[H]	2.87677	6.318363	1.969428	6.29931033	1.1170737599999994	2.9325191000000004
[H]C1=NC2C(C([H])=C1[H])=C([H])C(OC([H])([H])[H])=C([H])C=2C1C(=NC(F)=C(C=1[H])C1C(OC([H])([H])[H])=C([H])C([H])=C2N=C([H])C([H])=C([H])C=12)C([H])([H])[H]	2.8991800000000003	6.323732	2.0127599999999997	6.304196119999999	1.1569391999999992	2.9511194000000005
[H]C(=O)C1=C([H])C(=C([H])C([H])=C1F)C1N=C(SC=1C([H])([H])[H])C1C([H])=C([H])C([H])=C(C([H])=O)C=1F	2.93321	6.430293	2.1924360000000003	6.40116663	1.3222411200000002	2.9793643000000003
[H]C(=O)C1=C([H])C(C2=NC(C3C([H])=C([H])C([H])=C(C([H])=O)C=3F)=C(S2)C([H])([H])[H])=C([H])C([H])=C1F	2.8369299999999997	6.432841000000001	2.194092	6.403485310000001	1.3237646400000003	2.8994519
[H]C1=NC([H])=C(C2=NN(C(C3=NC([H])=C([H])C([H])=C3Cl)=C2[N+](=O)[O-])C([H])([H])[H])C([H])=C1Cl	3.35983	7.396167	2.7069	7.28011197	1.7955480000000001	3.3334589
[H]C1=NC([H])=C(C([H])=C1Cl)C1=C(C(=NN1C([H])([H])[H])C1=NC([H])=C([H])C([H])=C1Cl)[N+](=O)[O-]	3.3623199999999995	7.522566	2.722356	7.39513506	1.8097675199999999	3.3355255999999995
[H]SC1C([H])=C(C([H])=C([H])C=1C1=C([H])C([H])=C(F)C(=C1[H])C([H])([H])[H])C1C([H])=C([H])C([H])=C(C=1F)C([H])([H])[H]	3.35651	6.042542	1.074084	6.04831322	0.2933572799999995	3.3307033
[H]SC1C([H])=C(C([H])=C([H])C=1C1C([H])=C([H])C([H])=C(C=1F)C([H])([H])[H])C1=C([H])C([H])=C(F)C(=C1[H])C([H])([H])[H]	3.36315	6.0389930000000005	1.1183360000000002	6.045083630000001	0.33406911999999966	3.3362145
[H]C1=C(Cl)C(=C([H])C(=C1C1=NC(C2C(=C([H])C([H])=C(Cl)C=2C([H])([H])[H])N([H])[H])=C([H])N1C([H])([H])[H])N([H])[H])C([H])([H])[H]	3.16146	5.7664480000000005	0.990088	5.7970676800000005	0.2160809600000002	3.1688118000000003
[H]C1=C(Cl)C(=C([H])C(=C1C1N=C(C2C(=C([H])C([H])=C(Cl)C=2C([H])([H])[H])N([H])[H])N(C=1[H])C([H])([H])[H])N([H])[H])C([H])([H])[H]	3.06933	5.7576209999999985	0.9699399999999994	5.789035109999999	0.1975447999999993	3.0923439000000004
[H]C1=NC2=C(C([H])=NN2C([H])=C1[H])C1=NC([H])=C(C(F)=C1[H])C1C([H])=NC2=C([H])C([H])=NN2C=1[H]	2.69251	6.107061	1.941184	6.10702551	1.0910892799999994	2.7795833
[H]C1=NC2=C(C([H])=NN2C([H])=C1[H])C1=C([H])N=C(C([H])=C1F)C1C([H])=NC2=C([H])C([H])=NN2C=1[H]	2.78464	6.1616610000000005	1.8696079999999995	6.156711510000001	1.0252393599999996	2.8560512000000005
[H]C1=C([H])C(=C(F)C(F)=C1OC([H])([H])[H])C1C([H])=C(C([H])=C(C#N)C=1OC([H])([H])[H])C1=C([H])C([H])=C(F)C(F)=C1OC([H])([H])[H]	3.23533	6.465601	1.6532239999999998	6.43329691	0.8261660800000001	3.2301238999999997
[H]C1=C([H])C(=C(F)C(F)=C1OC([H])([H])[H])C1C([H])=C(C#N)C(OC([H])([H])[H])=C(C=1[H])C1=C([H])C([H])=C(F)C(F)=C1OC([H])([H])[H]	3.28264	6.370415	1.615504	6.34667765	0.7914636799999997	3.2693912
[H]C1=NC([H])=C(C(F)=C1[H])C1C([H])=C([H])C(C2=NC([H])=C([H])C(F)=C2[H])=C([H])C=1N([H])C(=S)C([H])([H])[H]	2.40201	5.956729	2.182316	5.97022339	1.3129307199999998	2.5384683000000003
[H]C1=NC([H])=C(C(F)=C1[H])C1C([H])=C([H])C(C2=NC([H])=C([H])C(F)=C2[H])=C(C=1[H])N([H])C(=S)C([H])([H])[H]	2.60204	5.965738	2.168884	5.97842158	1.30057328	2.7044932000000004
[H]C1=NC(=C(F)C([H])=C1[H])C1=C([H])N=C2C(C3=NC([H])=C(F)C([H])=C3[H])=C([H])C(Cl)=C([H])N21	2.7970900000000003	6.149831	1.7945360000000001	6.14594621	0.9561731199999999	2.8663847000000002
[H]C1=NC(=C(F)C([H])=C1[H])C1C2=NC([H])=C(C3=NC([H])=C(F)C([H])=C3[H])N2C([H])=C(Cl)C=1[H]	2.7730200000000003	6.190053	1.94652	6.18254823	1.0959984	2.8464066000000003
[H]C1=NC(=C(C2=NC([H])=C(C3=NC(=C([H])N3[H])[N+](=O)[O-])C(=N2)C([H])([H])[H])N1[H])[N+](=O)[O-]	2.9357	7.130719999999999	2.737812	7.038555199999999	1.8239870399999996	2.9814310000000006
[H]C1=NC(=C(C2C(=NC(=NC=2[H])C2=NC(=C([H])N2[H])[N+](=O)[O-])C([H])([H])[H])N1[H])[N+](=O)[O-]	2.76472	7.099052	2.981244	7.00973732	2.04794448	2.8395176
[H]C1C([H])=C([H])C2=C(C=1[H])C1=C([H])C(=C([H])C(=C1N2[H])[N+](=O)[O-])C1C([H])=C(C([H])=C(F)C=1N([H])[H])C1C([H])=C([H])C2=C(C=1[H])C1=C([H])C([H])=C([H])C(=C1N2[H])[N+](=O)[O-]	2.6037	5.797297	2.4220680000000003	5.82514027	1.5335025600000005	2.705871
[H]C1C([H])=C([H])C2=C(C=1[H])C1=C([H])C(=C([H])C(=C1N2[H])[N+](=O)[O-])C1C([H])=C(F)C(=C(C=1[H])C1C([H])=C([H])C2=C(C=1[H])C1=C([H])C([H])=C([H])C(=C1N2[H])[N+](=O)[O-])N([H])[H]	2.56967	5.773637000000001	2.435132	5.80360967	1.54552144	2.6776261000000003
[H]C1N=C(C([H])=C(C=1C1C([H])=C([H])C([H])=C([H])C=1C#N)[N+](=O)[O-])C1C([H])=C([H])C([H])=C(C#N)C=1[H]	2.95645	7.153105999999998	2.982348	7.058926459999999	2.04896016	2.9986535
[H]C1N=C(C([H])=C(C=1C1C([H])=C([H])C([H])=C(C#N)C=1[H])[N+](=O)[O-])C1C([H])=C([H])C([H])=C([H])C=1C#N	2.95147	7.144006	2.98152	7.05064546	2.0481984	2.9945201
[H]C1=NC(C2C(=NC(F)=C(C3=NC([H])=C(C(=C3[H])C([H])([H])[H])N([H])[H])C=2[H])C([H])([H])[H])=C(C(=C1[H])C([H])([H])[H])N([H])[H]	3.0045900000000003	6.144189	1.403168	6.1408119899999996	0.5961145600000002	3.0386097000000003
[H]C1=NC(C2=C(F)N=C(C(C3=NC([H])=C(C(=C3[H])C([H])([H])[H])N([H])[H])=C2[H])C([H])([H])[H])=C(C(=C1[H])C([H])([H])[H])N([H])[H]	3.17889	6.118982	1.4970999999999997	6.11787362	0.6825319999999993	3.1832787000000002
[H]C1=NC2=C(C([H])=C(OC([H])([H])[H])C(C3C([H])=C([H])C([H])=C(C=3[H])C([H])([H])[H])=C2C([H])=C1[H])C1C([H])=C([H])C([H])=C([H])C=1C([H])([H])[H]	2.91578	6.026707999999998	1.7932480000000002	6.033904279999998	0.9549881600000001	2.9648974
[H]C1=NC2=C(C([H])=C(OC([H])([H])[H])C(=C2C([H])=C1[H])C1C([H])=C([H])C([H])=C([H])C=1C([H])([H])[H])C1C([H])=C([H])C([H])=C(C=1[H])C([H])([H])[H]	2.8684699999999994	6.013604000000001	1.7992280000000005	6.0219796400000005	0.9604897599999997	2.9256300999999993
[H]C1=NC([H])=C([H])C(C2=C([H])C(F)=C(C3=NC([H])=C([H])C([H])=C3C([H])([H])[H])C([H])=C2F)=C1C([H])([H])[H]	3.69349	6.9327950000000005	1.559936	6.858443450000001	0.7403411200000001	3.6103967000000003
[H]C1=NC([H])=C([H])C(C2C([H])=C(F)C(C3=NC([H])=C([H])C([H])=C3C([H])([H])[H])=C([H])C=2F)=C1C([H])([H])[H]	3.73167	6.944534	1.5728159999999995	6.86912594	0.7521907199999998	3.6420861
[H]C1C2=NN([H])C(C3C(F)=C(C([H])=C(F)C=3N([H])[H])C3C([H])=C([H])C4=NN([H])C([H])=C4C=3[H])=C2C([H])=C([H])C=1[H]	2.84606	5.680999	1.4555159999999998	5.719309089999999	0.6442747199999994	2.9070298
[H]C1C2=NN([H])C(C3C([H])=C(F)C(=C(C=3F)C3C([H])=C([H])C4=NN([H])C([H])=C4C=3[H])N([H])[H])=C2C([H])=C([H])C=1[H]	2.9606	5.7865590000000005	1.5353719999999995	5.815368690000001	0.7177422399999998	3.002098
[H]C1C(=NC(=C(F)C=1[H])C1=C([H])C(=C([H])C([H])=C1C([H])([H])[H])[N+](=O)[O-])C1C([H])=C(C([H])=C([H])C=1[N+](=O)[O-])C([H])([H])[H]	3.2527599999999994	7.027162	2.44332	6.94431742	1.5530543999999997	3.2445907999999997
[H]C1C(=NC(=C(F)C=1[H])C1C([H])=C(C([H])=C([H])C=1[N+](=O)[O-])C([H])([H])[H])C1=C([H])C(=C([H])C([H])=C1C([H])([H])[H])[N+](=O)[O-]	3.0585400000000003	7.0571920000000015	2.532836	6.971644720000001	1.6354091200000003	3.0833882000000004
[H]C1=C([H])C(=C(C2C([H])=C(C([H])=C(C=2[N+](=O)[O-])C([H])([H])[H])C2=C([H])C(=C([H])C(=C2[H])C([H])([H])[H])C([H])([H])[H])C(=C1[H])C([H])([H])[H])C([H])([H])[H]	3.1697599999999997	6.808853000000001	2.308632	6.745656230000001	1.4291414399999995	3.1757008
[H]C1=C([H])C(=C(C2=C([H])C(C3=C([H])C(=C([H])C(=C3[H])C([H])([H])[H])C([H])([H])[H])=C(C(=C2[H])C([H])([H])[H])[N+](=O)[O-])C(=C1[H])C([H])([H])[H])C([H])([H])[H]	3.13822	6.753343000000001	2.397596	6.695142130000001	1.51098832	3.1495226
[H]C1=NC2=C([H])C(=C([H])C(C3C([H])=C(F)C(F)=C([H])C=3[H])=C2C([H])=C1[H])C1C([H])=C([H])C([H])=C(F)C=1F	3.3033900000000003	6.5772580000000005	1.913676	6.534904780000001	1.06578192	3.2866137
[H]C1=NC2=C([H])C(=C([H])C(C3C([H])=C([H])C([H])=C(F)C=3F)=C2C([H])=C1[H])C1C([H])=C(F)C(F)=C([H])C=1[H]	3.34821	6.5840830000000015	1.908524	6.541115530000002	1.06104208	3.3238143
[H]C1=NC(C2=C([H])C(C3=NC([H])=C(C(=C3[H])C([H])([H])[H])N([H])[H])=C(F)C(F)=C2OC([H])([H])[H])=C(C(=C1[H])C([H])([H])[H])N([H])[H]	3.1000400000000004	5.977568	1.3528439999999993	5.98918688	0.5498164799999996	3.1178332000000006
[H]C1=NC(C2C([H])=C(C3=NC([H])=C(C(=C3[H])C([H])([H])[H])N([H])[H])C(OC([H])([H])[H])=C(F)C=2F)=C(C(=C1[H])C([H])([H])[H])N([H])[H]	3.1299200000000003	5.987123	1.4296639999999998	5.99788193	0.6204908799999993	3.1426336000000004
[H]C1N=C2C([H])=C([H])C(=C([H])C2=C([H])C=1[H])C1N=C(C([H])=C(C=1N([H])[H])C([H])([H])[H])C1C([H])=C([H])N=C2C([H])=C([H])C([H])=C([H])C=12	2.74065	5.917053	1.8651	5.93411823	1.0210919999999994	2.8195395000000003
[H]C1N=C2C([H])=C([H])C(C3=NC(C4C([H])=C([H])N=C5C([H])=C([H])C([H])=C([H])C=45)=C(C(=C3[H])C([H])([H])[H])N([H])[H])=C([H])C2=C([H])C=1[H]	2.93487	5.97502	1.8528640000000005	5.9868682	1.0098348800000005	2.9807421000000005
[H]C1=NC2C([H])=NC([H])=C([H])C=2C(=C1[H])C1C(=C(C2=NC3C([H])=NC([H])=C([H])C=3C([H])=C2[H])C([H])=C(Cl)C=1C([H])([H])[H])N([H])[H]	2.85021	6.185684999999999	2.260424	6.17857335	1.3847900800000001	2.9104743
[H]C1=NC2C([H])=NC([H])=C([H])C=2C(=C1[H])C1C([H])=C(Cl)C(=C(C2=NC3C([H])=NC([H])=C([H])C=3C([H])=C2[H])C=1N([H])[H])C([H])([H])[H]	2.88175	6.239466	2.245244	6.22751406	1.3708244799999996	2.9366525
[H]C1=NC([H])=C(C(=N1)C([H])([H])[H])C1=C([H])OC2C([H])=C([H])C(C3=NC([H])=C([H])C(=N3)C([H])([H])[H])=C([H])C=21	3.2917699999999988	6.314541	1.6012439999999994	6.29583231	0.7783444799999995	3.2769690999999987
[H]C1=NC([H])=C(C(=N1)C([H])([H])[H])C1C([H])=C([H])C2OC([H])=C(C3=NC([H])=C([H])C(=N3)C([H])([H])[H])C=2C=1[H]	3.14237	6.278778	1.716704	6.263287979999999	0.88456768	3.1529671
[H]C1=NN2C(=N1)C(=C([H])C([H])=C2[H])C1=C([H])N=C(C2C([H])=C([H])C3=NC([H])=NN3C=2[H])N1C([H])([H])[H]	3.03198	6.077668	1.530404	6.080277880000001	0.7131716799999994	3.0613434
[H]C1=NN2C(=N1)C(C1=NC([H])=C(C3C([H])=C([H])C4=NC([H])=NN4C=3[H])N1C([H])([H])[H])=C([H])C([H])=C2[H]	2.95728	5.978569	1.5783360000000002	5.99009779	0.7572691200000001	2.9993424
[H]C1=NC2C([H])=C([H])C(=C([H])C=2S1)C1N=C(C2=NC3C([H])=C([H])C([H])=C([H])C=3S2)C([H])=C([H])C=1N([H])[H]	2.85685	5.885021	1.91662	5.90496911	1.0684904	2.9159855000000006
[H]C1=NC2C([H])=C([H])C(=C([H])C=2S1)C1N=C(C2=NC3C([H])=C([H])C([H])=C([H])C=3S2)C([H])=C([H])C=1N([H])[H]	2.6128299999999998	5.729502	1.9708080000000001	5.76344682	1.11834336	2.7134489
[H]C(=O)C1C(F)=C(C([H])=C([H])C=1C1C([H])=C(C([H])=C2C([H])=C([H])C([H])=NC=12)[N+](=O)[O-])C1C([H])=NC2=C([H])C([H])=C(C([H])=C2C=1[H])[N+](=O)[O-]	2.86183	6.917234	2.86836	6.844282939999999	1.9440912	2.9201189000000003
[H]C(=O)C1C(F)=C(C([H])=C([H])C=1C1C([H])=NC2=C([H])C([H])=C(C([H])=C2C=1[H])[N+](=O)[O-])C1C([H])=C(C([H])=C2C([H])=C([H])C([H])=NC=12)[N+](=O)[O-]	2.85021	6.9177800000000005	2.873052	6.8447798	1.9484078399999998	2.9104743
[H]C1=NC([H])=C(F)C(=C1[H])C1=C(F)N=C(C2=NC([H])=C(F)C([H])=C2[H])N1C([H])([H])[H]	2.99214	6.47734	1.9536039999999997	6.4439794	1.1025156799999998	3.0282762
[H]C1=NC([H])=C(F)C(C2=NC(F)=C(C3=NC([H])=C(F)C([H])=C3[H])N2C([H])([H])[H])=C1[H]	2.93238	6.5217480000000005	1.9634479999999999	6.484390680000001	1.1115721599999997	2.9786754
[H]C1N=C2C(=C([H])C=1[H])C(C1=C([H])C(F)=C(C([H])=C1[N+](=O)[O-])C1=C([H])N=C3C(=C1[H])C([H])=C([H])N3[H])=C([H])N2[H]	2.87926	6.343115	2.475336	6.3218346499999996	1.58250912	2.9345858
[H]C1N=C2C(=C([H])C=1[H])C(C1C([H])=C(C(=C([H])C=1F)C1=C([H])N=C3C(=C1[H])C([H])=C([H])N3[H])[N+](=O)[O-])=C([H])N2[H]	2.2766800000000003	6.354763	2.441388	6.33243433	1.55127696	2.4344444000000003
[H]C1=C([H])C([H])=C(C2=NC3C(S2)=C(C([H])=C([H])C=3C2C([H])=C([H])C([H])=C([H])C=2N([H])[H])C2C([H])=C([H])C([H])=C(C=2[H])N([H])[H])C([H])=C1[H]	3.18636	5.778005	1.8780720000000004	5.8075845500000005	1.0330262399999999	3.1894788000000003
[H]C1=C([H])C([H])=C(C2=NC3C(S2)=C(C([H])=C([H])C=3C2C([H])=C([H])C([H])=C(C=2[H])N([H])[H])C2C([H])=C([H])C([H])=C([H])C=2N([H])[H])C([H])=C1[H]	3.11415	5.723587	1.84946	5.75806417	1.0067031999999996	3.1295445
[H]C1C([H])=C([H])C(C2=NN3C(=N2)C([H])=C(C([H])=C3[H])C2C([H])=C([H])C(N=C=S)=C([H])C=2[H])=C(N=C=S)C=1[H]	3.3291199999999987	6.311811	1.917908	6.29334801	1.0696753599999997	3.307969599999999
[H]C1C([H])=C([H])C(=C(N=C=S)C=1[H])C1=C([H])C2=NC(=NN2C([H])=C1[H])C1C([H])=C([H])C(N=C=S)=C([H])C=1[H]	3.31667	6.278232	1.9001520000000005	6.26279112	1.0533398400000005	3.2976361
[H]C1=NC([H])=C([H])C(C2=NC(=NC([H])=C2[H])C2=NC([H])=C([H])C([H])=C2N([H])[H])=C1N([H])[H]	2.3580200000000002	6.318272	2.1706319999999995	6.2992275200000005	1.3021814399999991	2.5019566000000006
[H]C1=NC([H])=C([H])C(C2=NC([H])=C([H])C(=N2)C2=NC([H])=C([H])C([H])=C2N([H])[H])=C1N([H])[H]	2.6103400000000003	6.267676	2.024168	6.25318516	1.1674345600000002	2.7113822000000005
[H]C1=NC2=C([H])C([H])=C(C([H])=C2C(Cl)=N1)C1=C2C(=NN1[H])C([H])=C([H])C(=C2[H])C1C([H])=C([H])C([H])=C2C(Cl)=NC([H])=NC=12	2.51406	6.087769000000001	2.583252	6.089469790000001	1.6817918399999998	2.6314698000000005
[H]C1=NC2=C([H])C([H])=C(C([H])=C2C(Cl)=N1)C1C([H])=C([H])C2=NN([H])C(C3C([H])=C([H])C([H])=C4C(Cl)=NC([H])=NC=34)=C2C=1[H]	2.7863	6.09696	2.488124	6.0978336	1.59427408	2.8574290000000007
[H]C1N=C(C(C2=C([H])C(C3=C([H])N=C(C([H])=C3C([H])([H])[H])C([H])([H])[H])=C(C(C(=O)C([H])([H])[H])=C2[H])N([H])C(=O)C([H])([H])[H])=C(C=1[H])C([H])([H])[H])C([H])([H])[H]	2.66014	6.675356000000002	2.116536	6.624173960000002	1.25241312	2.7527162
[H]C1N=C(C(C2C([H])=C(C([H])=C(C(=O)C([H])([H])[H])C=2N([H])C(=O)C([H])([H])[H])C2=C([H])N=C(C([H])=C2C([H])([H])[H])C([H])([H])[H])=C(C=1[H])C([H])([H])[H])C([H])([H])[H]	2.65931	6.7016550000000015	2.109544	6.648106050000001	1.24598048	2.7520273
[H]C1=C([H])C([H])=C(C2=NC3C(S2)=C([H])C([H])=C([H])C=3C2C([H])=C(OC([H])([H])[H])C(=C(C=2Cl)C2C([H])=C([H])C([H])=C3N=C(SC=23)C2C([H])=C([H])C([H])=C([H])C=2[H])N([H])[H])C([H])=C1[H]	3.20379	5.879743	2.003192	5.900166130000001	1.1481366399999997	3.2039457000000002
[H]C1=C([H])C([H])=C(C2=NC3C(S2)=C([H])C([H])=C([H])C=3C2C(Cl)=C(C([H])=C(OC([H])([H])[H])C=2N([H])[H])C2C([H])=C([H])C([H])=C3N=C(SC=23)C2C([H])=C([H])C([H])=C([H])C=2[H])C([H])=C1[H]	3.15233	5.865456	2.011564	5.88716496	1.1558388800000001	3.1612339
[H]C1=NC([H])=C(N=C1[H])C1C([H])=C(C(=C(C2=NC([H])=C([H])N=C2[H])C=1Cl)N([H])[H])C([H])([H])[H]	2.9257400000000002	6.098416	1.9341920000000004	6.09915856	1.0846566400000004	2.9731642000000003
[H]C1=NC([H])=C(N=C1[H])C1C(Cl)=C(C2=NC([H])=C([H])N=C2[H])C([H])=C(C=1N([H])[H])C([H])([H])[H]	2.88341	6.084402000000001	1.9552599999999998	6.08640582	1.1040391999999999	2.9380303000000003
[H]C1=C([H])C(C2C([H])=C([H])C(C3=C([H])C([H])=C4C(=C3[H])C([H])([H])C([H])([H])C([H])([H])N4[H])=C(C=2[H])C([H])([H])[H])=C2C(=C1[H])C([H])([H])C([H])([H])C([H])([H])N2[H]	3.20296	5.574074	0.8277080000000003	5.622007340000001	0.06669136000000009	3.2032568
[H]C1=C([H])C(C2C([H])=C([H])C(=C([H])C=2C([H])([H])[H])C2=C([H])C([H])=C3C(=C2[H])C([H])([H])C([H])([H])C([H])([H])N3[H])=C2C(=C1[H])C([H])([H])C([H])([H])C([H])([H])N2[H]	3.21873	5.5475020000000015	0.7705760000000001	5.597826820000002	0.01412992000000024	3.2163459000000003
[H]C1=C([H])C(=C2C([H])=C([H])N([H])C2=C1[H])C1C([H])=C(F)C(Cl)=C(C2C([H])=C([H])C([H])=C3C([H])=C([H])N([H])C=23)C=1N([H])[H]	3.07846	5.887205000000001	1.2275400000000003	5.90695655	0.43453680000000006	3.0999218000000006
[H]C1=C([H])C(C2=C(Cl)C(F)=C([H])C(C3C([H])=C([H])C([H])=C4C([H])=C([H])N([H])C=34)=C2N([H])[H])=C2C([H])=C([H])N([H])C2=C1[H]	3.0934	5.839976	1.2279080000000002	5.86397816	0.4348753600000004	3.112322
[H]C1=NC([H])=C(C([H])=C1N([H])[H])C1=C([H])N=C(C2=NC([H])=C([H])C([H])=C2N([H])[H])C([H])=C1[H]	2.72405	6.043907	1.9317080000000004	6.04955537	1.0823713600000007	2.8057615
[H]C1=NC([H])=C(C2=NC([H])=C(C3=NC([H])=C([H])C([H])=C3N([H])[H])C([H])=C2[H])C([H])=C1N([H])[H]	2.66761	5.938802	1.921864	5.95390982	1.0733148799999999	2.7589163
[H]C1=NC(=C([H])C2=NN([H])C([H])=C12)C1N=C(C2=C3C([H])=NC([H])=C([H])C3=NN2[H])C(=C([H])C=1OC([H])([H])[H])[N+](=O)[O-]	2.49497	6.5961859999999986	2.9912719999999995	6.552129259999999	2.0571702399999996	2.6156251
[H]C1=NC(C2=NC(=C(OC([H])([H])[H])C([H])=C2[N+](=O)[O-])C2=C3C([H])=NC([H])=C([H])C3=NN2[H])=C([H])C2=NN([H])C([H])=C12	2.3605099999999997	6.531758	3.031292	6.4934997800000005	2.09398864	2.5040233
[H]C1N=C(C([H])=C(C=1C1C([H])=C(Cl)C([H])=C([H])C=1Cl)C([H])([H])[H])C1=C([H])C(Cl)=C([H])C([H])=C1Cl	3.75574	6.75398	1.834188	6.6957218	0.99265296	3.6620642
[H]C1N=C(C([H])=C(C=1C1=C([H])C(Cl)=C([H])C([H])=C1Cl)C([H])([H])[H])C1C([H])=C(Cl)C([H])=C([H])C=1Cl	3.6578	6.7372359999999984	1.8807400000000003	6.680484759999999	1.0354808000000002	3.580774
[H]C1C(=O)N(C([H])=C(C=1[H])C1=C([H])C(C2C(=O)N(C([H])=C([H])C=2[H])C([H])([H])[H])=C(C(=C1[H])C(F)(F)F)N([H])[H])C([H])([H])[H]	2.91661	5.832969	1.3994879999999998	5.85760179	0.5927289599999996	2.9655863
[H]C1=C([H])C(C2C([H])=C(C(=O)N(C=2[H])C([H])([H])[H])C2=C([H])C([H])=C(C(=C2[H])C(F)(F)F)N([H])[H])=C(C(=C1[H])C(F)(F)F)N([H])[H]	2.79875	5.799936	1.4040879999999998	5.82754176	0.5969609599999997	2.8677625000000004
[H]C1=NC([H])=C(C([H])=C1C#N)C1=C([H])N=C2C(=C1[H])C(C1=NC([H])=C([H])C([H])=C1C#N)=C([H])N2[H]	3.00127	6.204249	1.900796	6.19546659	1.0539323199999995	3.0358541
[H]C1=NC([H])=C(C([H])=C1C#N)C1C2C(=NC([H])=C(C3=NC([H])=C([H])C([H])=C3C#N)C=2[H])N([H])C=1[H]	3.0070799999999998	6.2006999999999985	1.91386	6.192236999999999	1.0659511999999998	3.0406763999999997
[H]C1=NN([H])C2=C([H])C(=C([H])C([H])=C12)C1C([H])=C(C([H])=C([H])C=1[N+](=O)[O-])C1C([H])=C([H])C([H])=C2C=1C([H])=NN2[H]	2.90416	6.451678	2.4273119999999997	6.42062698	1.5383270399999995	2.9552528000000002
[H]C1=NN([H])C2=C([H])C(=C([H])C([H])=C12)C1C([H])=C([H])C(=C(C=1[H])C1C([H])=C([H])C([H])=C2C=1C([H])=NN2[H])[N+](=O)[O-]	2.9531300000000003	6.482163	2.450772	6.44836833	1.5599102399999998	2.9958979
[H]C1C2=NN([H])C(C3C([H])=C(C([H])=C([H])C=3OC(C([H])([H])[H])(C([H])([H])[H])C([H])([H])[H])C3C([H])=C([H])C4=NN([H])C([H])=C4C=3[H])=C2C([H])=C([H])C=1[H]	2.87843	5.8026659999999985	1.471708	5.830026059999999	0.6591713600000002	2.9338968999999997
[H]C1C2=NN([H])C(C3C([H])=C([H])C(OC(C([H])([H])[H])(C([H])([H])[H])C([H])([H])[H])=C(C=3[H])C3C([H])=C([H])C4=NN([H])C([H])=C4C=3[H])=C2C([H])=C([H])C=1[H]	2.9597700000000002	5.805032	1.476032	5.832179119999999	0.6631494399999998	3.0014091
[H]C1=NC(C#N)=C(C([H])=C1C1C([H])=C([H])C([H])=C([H])C=1N([H])[H])C1C([H])=C([H])C([H])=C(C=1[H])N([H])[H]	2.9805200000000003	6.068841	1.9582040000000005	6.07224531	1.1067476799999998	3.0186316000000004
[H]C1=NC(C#N)=C(C([H])=C1C1C([H])=C([H])C([H])=C(C=1[H])N([H])[H])C1C([H])=C([H])C([H])=C([H])C=1N([H])[H]	2.9689	6.065929	1.9620680000000004	6.06959539	1.11030256	3.0089870000000003
[H]C1N=C(C(C2C([H])=C([H])C([H])=C(C=2N([H])[H])C([H])([H])C([H])([H])[H])=C(C=1C1=C([H])C([H])=C(C(=C1[H])C([H])([H])C([H])([H])[H])N([H])[H])C(F)(F)F)N([H])[H]	3.3042199999999995	5.8832010000000015	1.8094400000000002	5.903312910000001	0.9698848	3.2873025999999994
[H]C1N=C(C(C2=C([H])C([H])=C(C(=C2[H])C([H])([H])C([H])([H])[H])N([H])[H])=C(C=1C1C([H])=C([H])C([H])=C(C=1N([H])[H])C([H])([H])C([H])([H])[H])C(F)(F)F)N([H])[H]	3.27932	5.835516999999999	1.823884	5.85992047	0.9831732799999999	3.2666356
[H]C1=NC(=C(F)C([H])=C1[H])C1C([H])=C(C2=NC([H])=C(F)C([H])=C2[H])C([H])=C(F)C=1Cl	3.5349599999999994	6.825688	1.9375959999999999	6.760976080000001	1.0877883199999996	3.4788167999999997
[H]C1=NC(=C(F)C([H])=C1[H])C1C([H])=C(F)C(Cl)=C(C2=NC([H])=C(F)C([H])=C2[H])C=1[H]	3.5582	6.7874680000000005	1.9076959999999998	6.726195880000001	1.0602803199999995	3.498106
[H]C1=C([H])C(=C([H])C2SC(=NC=21)C1=C(Cl)C(=C([H])C([H])=C1N([H])[H])C([H])([H])[H])C1C([H])=C(C(Cl)=C([H])C=1N([H])[H])C([H])([H])[H]	2.75393	5.947447	1.94422	5.96177677	1.0938824	2.8305619
[H]C1=C([H])C(=C([H])C2SC(=NC=21)C1C([H])=C(C(Cl)=C([H])C=1N([H])[H])C([H])([H])[H])C1=C(Cl)C(=C([H])C([H])=C1N([H])[H])C([H])([H])[H]	3.10502	5.993311	1.7735599999999998	6.003513010000001	0.9368751999999994	3.1219666000000004
[H]C1=C([H])C(Cl)=C(C([H])=C1F)C1C([H])=C(OC(F)(F)F)C([H])=C([H])C=1C1=C([H])C(Cl)=C([H])C([H])=C1F	3.70345	6.890025	1.828024	6.819522749999999	0.9869820799999998	3.6186635000000003
[H]C1=C([H])C(Cl)=C(C([H])=C1F)C1C([H])=C([H])C(OC(F)(F)F)=C([H])C=1C1=C([H])C(Cl)=C([H])C([H])=C1F	3.76736	6.813312	1.865928	6.74971392	1.02185376	3.6717088
[H]C1=NC(C2C([H])=C(C(=C(C3=NC([H])=C(C([H])=C3[H])C([H])([H])[H])C=2F)N([H])[H])C([H])([H])[H])=C(C([H])=C1[H])C([H])([H])[H]	3.2046200000000002	5.876922	1.2881679999999998	5.89759902	0.49031455999999984	3.2046346000000003
[H]C1=NC(C2C(F)=C(C3=NC([H])=C(C([H])=C3[H])C([H])([H])[H])C([H])=C(C=2N([H])[H])C([H])([H])[H])=C(C([H])=C1[H])C([H])([H])[H]	3.04111	5.837701	1.2729879999999998	5.86190791	0.47634895999999927	3.0689213000000004
[H]C1=NC([H])=C(N=C1C(=O)C([H])([H])[H])C1N=C(C2=NC([H])=C([H])N=C2C(=O)C([H])([H])[H])C2=NC([H])=C(Cl)N2C=1[H]	2.59872	6.7936559999999995	2.936348	6.731826959999999	2.00664016	2.7017376000000004
[H]C1=NC([H])=C(N=C1C(=O)C([H])([H])[H])C1=NC(C2=NC([H])=C([H])N=C2C(=O)C([H])([H])[H])=C([H])N2C1=NC([H])=C2Cl	2.46841	6.7973870000000005	2.81316	6.73522217	1.8933071999999997	2.5935803
[H]C1N=C2C(=NC=1[H])N([H])C([H])=C2C1=NC(=C(C([H])=C1[H])C1N=C2C(=NC=1[H])N([H])C([H])=C2[H])N([H])[H]	2.6269400000000003	5.889207	2.0328159999999995	5.90877837	1.1753907199999993	2.7251602000000004
[H]C1N=C2C(=NC=1[H])N([H])C([H])=C2C1C([H])=C([H])C(=NC=1N([H])[H])C1N=C2C(=NC=1[H])N([H])C([H])=C2[H]	2.64686	5.831512999999998	1.942748	5.856276829999999	1.0925281599999996	2.7416938
[H]C1C([H])=C([H])C(=C(OC([H])([H])[H])C=1[H])C1C([H])=C(C([H])=C([H])C=1N([H])[H])C1C([H])=C([H])C(OC([H])([H])[H])=C([H])C=1[H]	3.4088000000000003	5.598917	0.8231999999999999	5.6446144700000005	0.06254399999999993	3.374104
[H]C1C([H])=C([H])C(=C(OC([H])([H])[H])C=1[H])C1C([H])=C([H])C(=C(C=1[H])C1C([H])=C([H])C(OC([H])([H])[H])=C([H])C=1[H])N([H])[H]	3.39054	5.658795	0.8224640000000001	5.699103449999999	0.06186688000000018	3.3589482000000004
[H]C1=NC(=C(C2=NC([H])=C(C3=NC(=C([H])C([H])=C3[H])C([H])([H])[H])C([H])=C2C#N)C([H])=C1[H])C([H])([H])[H]	3.193	6.808033999999998	2.392996	6.744910939999999	1.50675632	3.19499
[H]C1=NC(=C(C([H])=C1[H])C1=C([H])N=C(C2=NC(=C([H])C([H])=C2[H])C([H])([H])[H])C(C#N)=C1[H])C([H])([H])[H]	3.14735	6.8098540000000005	2.4462639999999998	6.746567140000001	1.5557628799999996	3.1571005000000003
[H]C1=NC([H])=C(S1)C1C([H])=C(C2=NC([H])=C([H])S2)C([H])=C(C=1C([H])([H])[H])[N+](=O)[O-]	2.87013	6.558057000000001	2.500452	6.517431870000001	1.60561584	2.9270079000000004
[H]C1=NC([H])=C(S1)C1=C([H])C(C2=NC([H])=C([H])S2)=C(C(=C1[H])[N+](=O)[O-])C([H])([H])[H]	2.93902	6.612475	2.4950240000000004	6.56695225	1.60062208	2.9841866
[H]C1C([H])=C(OC([H])([H])[H])C(=C(C2=NC(=C(OC([H])([H])C([H])([H])[H])C([H])=C2N([H])[H])C2C([H])=C(OC([H])([H])[H])C(=C([H])C=2Cl)N([H])[H])C=1Cl)N([H])[H]	3.15565	5.813768	1.4936039999999997	5.84012888	0.6793156799999993	3.1639895000000005
[H]C1C([H])=C(OC([H])([H])[H])C(=C(C=1Cl)C1N=C(C2C([H])=C(OC([H])([H])[H])C(=C([H])C=2Cl)N([H])[H])C(=C([H])C=1OC([H])([H])C([H])([H])[H])N([H])[H])N([H])[H]	3.1639500000000003	5.812858	1.4343559999999995	5.83930078	0.6248075199999992	3.1708785000000006
[H]C1C([H])=C([H])C2C(C=1[H])=C([H])C1=NSN=C1C=2C1=C(Cl)C(F)=C([H])C(C2C3=NSN=C3C([H])=C3C([H])=C([H])C([H])=C([H])C=23)=C1N([H])[H]	1.9397	6.13336	3.428824	6.1309575999999995	2.45971808	2.1547510000000005
[H]C1C([H])=C([H])C2C(C=1[H])=C([H])C1=NSN=C1C=2C1=C(Cl)C(F)=C([H])C(C2C3=NSN=C3C([H])=C3C([H])=C([H])C([H])=C([H])C=23)=C1N([H])[H]	2.01855	6.162025	3.40564	6.15704275	2.4383888	2.2201965
[H]C1=NN2C(=N1)C(=C([H])C(C1C(F)=C([H])C([H])=C([H])C=1Cl)=C2[H])C1C([H])=C(F)C([H])=C(Cl)C=1[H]	3.52251	6.656155	1.7731000000000003	6.60670105	0.9364520000000001	3.4684833
[H]C1=NN2C(=N1)C(=C([H])C(C1C([H])=C(F)C([H])=C(Cl)C=1[H])=C2[H])C1C(F)=C([H])C([H])=C([H])C=1Cl	3.2253699999999994	6.5647910000000005	1.943484	6.52355981	1.0932052799999994	3.2218570999999994
[H]C1=C([H])C(F)=C(C(F)=C1[H])C1C([H])=C(C2C([H])=C([H])C(F)=C([H])C=2F)C(=C(C#N)C=1F)N([H])[H]	2.9431700000000003	6.298433999999999	1.515408	6.28117494	0.6993753599999994	2.9876311000000007
[H]C1=C([H])C(F)=C(C(F)=C1[H])C1=C([H])C(=C(F)C(C#N)=C1N([H])[H])C1C([H])=C([H])C(F)=C([H])C=1F	3.06352	6.308444000000001	1.491396	6.29028404	0.67728432	3.0875216
[H]C1=NN2C(=N1)C([H])=C([H])C([H])=C2C1C(F)=C(C2=NN3C(=N2)C([H])=C([H])C([H])=C3[H])C([H])=C([H])C=1[N+](=O)[O-]	3.07099	6.898852000000001	2.672216	6.82755532	1.7636387200000003	3.0937217000000006
[H]C1=NN2C(=N1)C([H])=C([H])C([H])=C2C1C([H])=C([H])C(=C(C2=NN3C(=N2)C([H])=C([H])C([H])=C3[H])C=1F)[N+](=O)[O-]	2.7672099999999995	6.916961	2.733212	6.84403451	1.81975504	2.8415843
[H]C1=NN2C(=N1)C([H])=C(C([H])=C2[H])C1C([H])=C([H])C(C2=NN3C(=N2)C([H])=C([H])C([H])=C3[H])=C(C=1[H])N([H])C(=O)C1C([H])=C([H])C([H])=C([H])C=1[H]	3.23035	6.477886	1.78552	6.44447626	0.9478783999999996	3.2259905
[H]C1=NN2C(=N1)C([H])=C(C([H])=C2[H])C1C([H])=C([H])C(C2=NN3C(=N2)C([H])=C([H])C([H])=C3[H])=C([H])C=1N([H])C(=O)C1C([H])=C([H])C([H])=C([H])C=1[H]	3.06435	6.436935999999998	1.926556	6.407211759999998	1.0776315199999997	3.0882105
[H]C1=NC2=C(C([H])=C([H])C(C3C([H])=C(Cl)C(=C([H])C=3OC([H])([H])[H])N([H])[H])=C2C([H])=C1[H])C1C(OC([H])([H])[H])=C([H])C([H])=C(Cl)C=1N([H])[H]	2.8850700000000002	6.062016000000001	1.9601360000000003	6.06603456	1.1085251200000004	2.9394081000000005
[H]C1=NC2=C(C([H])=C([H])C(=C2C([H])=C1[H])C1C(OC([H])([H])[H])=C([H])C([H])=C(Cl)C=1N([H])[H])C1C([H])=C(Cl)C(=C([H])C=1OC([H])([H])[H])N([H])[H]	3.0253400000000004	6.002957	1.910088	6.01229087	1.0624809600000003	3.0558322
[H]C1=NN2C(=N1)C(=NC(C1=C([H])N=C([H])C([H])=C1[N+](=O)[O-])=C2[H])C1=NC([H])=C([H])C(=C1[H])[N+](=O)[O-]	2.9597700000000002	7.219081000000001	3.0859400000000003	7.118963710000001	2.1442648	3.0014091
[H]C1=NN2C(=N1)C(=NC(C1=NC([H])=C([H])C(=C1[H])[N+](=O)[O-])=C2[H])C1=C([H])N=C([H])C([H])=C1[N+](=O)[O-]	2.70247	7.202336999999999	3.2715959999999997	7.103726669999999	2.31506832	2.7878501
[H]C1=NC2=C(C([H])=NN2C([H])=C1[H])C1=NC(C2C([H])=NC3=C([H])C([H])=NN3C=2[H])=C(S1)C([H])([H])[H]	2.56967	5.7203110000000015	1.80852	5.755083010000002	0.9690383999999996	2.6776261000000003
[H]C1=NC2=C(C([H])=NN2C([H])=C1[H])C1N=C(SC=1C([H])([H])[H])C1C([H])=NC2=C([H])C([H])=NN2C=1[H]	2.64935	5.836245	1.713024	5.8605829499999995	0.8811820799999994	2.7437605000000005
[H]C1=NC(=C([H])C2C1=NN([H])C=2C1C([H])=C(F)C(Cl)=C([H])C=1N([H])[H])C1=C(Cl)C(F)=C([H])C([H])=C1N([H])[H]	2.7497800000000003	6.105969	1.928672	6.10603179	1.07957824	2.8271174000000006
[H]C1=NC(=C([H])C2C1=NN([H])C=2C1=C(Cl)C(F)=C([H])C([H])=C1N([H])[H])C1C([H])=C(F)C(Cl)=C([H])C=1N([H])[H]	2.72737	6.112157	2.03346	6.11166287	1.1759832000000001	2.8085171000000004
[H]C1N=C2C(=C([H])C(Cl)=NN2C=1[H])C1N=C(C2=NC([H])=C([H])N2C=1[H])C1=C([H])N=C2C([H])=C([H])C(Cl)=NN21	2.28996	6.299981	2.6346800000000004	6.28258271	1.7291056000000005	2.4454668
[H]C1N=C2C(C3=NC(C4=C([H])N=C5C([H])=C([H])C(Cl)=NN54)=C([H])N4C3=NC([H])=C4[H])=C([H])C(Cl)=NN2C=1[H]	2.70081	6.484074	2.42722	6.45010734	1.5382424000000001	2.7864723000000002
[H]C1=NC(=C(C([H])=C1[H])C1C([H])=C([H])C(=C(F)C=1[H])C1C([H])=NC(=C([H])C=1[H])N([H])[H])N([H])[H]	3.22454	5.907043	1.171512	5.925009129999999	0.3829910399999994	3.2211682
[H]C1=NC(=C(C([H])=C1[H])C1C([H])=C([H])C(=C([H])C=1F)C1C([H])=NC(=C([H])C=1[H])N([H])[H])N([H])[H]	3.29841	5.900946	1.1463039999999998	5.91946086	0.35979968000000007	3.2824803000000005
[H]C(=O)C1C([H])=C(C([H])=C([H])C=1C1C([H])=C([H])N=C(C=1[H])N([H])[H])C1N=C(C([H])=C([H])C=1[H])N([H])[H]	2.82531	6.20889	2.057012	6.1996899	1.1976510399999993	2.8898073
[H]C(=O)C1C([H])=C(C([H])=C([H])C=1C1N=C(C([H])=C([H])C=1[H])N([H])[H])C1C([H])=C([H])N=C(C=1[H])N([H])[H]	2.8145199999999995	6.245836	2.060784	6.23331076	1.2011212799999997	2.8808515999999997
[H]C(=O)C1C(F)=C([H])C(=C([H])C=1C1C([H])=C(C([H])=C([H])C=1[N+](=O)[O-])N([H])[H])C1=C([H])C(=C([H])C([H])=C1N([H])[H])[N+](=O)[O-]	2.51904	6.571161	2.589324	6.5293565099999995	1.6873780799999998	2.6356032000000003
[H]C(=O)C1C(F)=C([H])C(=C([H])C=1C1=C([H])C(=C([H])C([H])=C1N([H])[H])[N+](=O)[O-])C1C([H])=C(C([H])=C([H])C=1[N+](=O)[O-])N([H])[H]	2.74646	6.6024650000000005	2.4769	6.55784315	1.583948	2.8243618
[H]C1=C(F)C(Cl)=C(C([H])=C1C1C([H])=C(OC([H])([H])[H])C(=C([H])C=1Cl)N([H])[H])C1C(Cl)=C([H])C([H])=C(OC([H])([H])[H])C=1N([H])[H]	3.21375	6.0486390000000005	1.2599239999999998	6.053861490000001	0.46433007999999987	3.2122125
[H]C1=C(F)C(Cl)=C(C([H])=C1C1C(Cl)=C([H])C([H])=C(OC([H])([H])[H])C=1N([H])[H])C1C([H])=C(OC([H])([H])[H])C(=C([H])C=1Cl)N([H])[H]	3.2527599999999994	6.020156	1.3453	6.02794196	0.5428759999999997	3.2445907999999997
[H]C1C([H])=C([H])C(=C(C#N)C=1[H])C1SC(=C([H])C=1C([H])([H])C([H])([H])C([H])([H])C([H])([H])[H])C1C([H])=C([H])C([H])=C(C#N)C=1[H]	2.55805	5.877650000000001	2.030056	5.898261500000001	1.17285152	2.6679815000000002
[H]C1C([H])=C([H])C(=C(C#N)C=1[H])C1SC(C2C([H])=C([H])C([H])=C(C#N)C=2[H])=C(C=1[H])C([H])([H])C([H])([H])C([H])([H])C([H])([H])[H]	2.68172	5.933342	1.96446	5.94894122	1.1125032	2.7706276
[H]C1N=C(OC([H])([H])[H])C2C(=NN([H])C=2C2C([H])=C(C([H])=C(F)C=2C#N)C2C3=NN([H])C([H])=C3C(=NC=2[H])OC([H])([H])[H])C=1[H]	2.80788	6.4364810000000015	2.41112	6.406797710000001	1.5234303999999996	2.8753404
[H]C1N=C(OC([H])([H])[H])C2C(=NN([H])C=2C2C([H])=C(F)C(C#N)=C(C=2[H])C2C3=NN([H])C([H])=C3C(=NC=2[H])OC([H])([H])[H])C=1[H]	2.77966	6.4271080000000005	2.4029320000000003	6.39826828	1.5158974400000003	2.8519178
[H]C1=C([H])C(=C([H])C(=C1[H])[N+](=O)[O-])C1C([H])=C(C([H])=C2SC(=NC=12)N([H])[H])C1C([H])=C([H])C([H])=C([H])C=1[N+](=O)[O-]	2.78962	6.105514	2.2863680000000004	6.1056177400000005	1.4086585600000001	2.8601846
[H]C1=C([H])C(=C([H])C(=C1[H])[N+](=O)[O-])C1C([H])=C2SC(=NC2=C(C=1[H])C1C([H])=C([H])C([H])=C([H])C=1[N+](=O)[O-])N([H])[H]	2.85602	6.132541000000002	2.3401880000000004	6.130212310000001	1.4581729600000002	2.9152966000000005
[H]C(=O)C1=C([H])C(=C([H])C([H])=C1OC([H])(C([H])([H])[H])C([H])([H])[H])C1C([H])=C([H])C(=C(OC([H])([H])[H])C=1[H])C1C([H])=C([H])C([H])=C(C([H])=O)C=1OC([H])(C([H])([H])[H])C([H])([H])[H]	2.89088	6.2092540000000005	1.978352	6.2000211400000005	1.1252838399999998	2.9442304000000004
[H]C(=O)C1=C([H])C(=C([H])C([H])=C1OC([H])(C([H])([H])[H])C([H])([H])[H])C1C([H])=C([H])C(=C([H])C=1OC([H])([H])[H])C1C([H])=C([H])C([H])=C(C([H])=O)C=1OC([H])(C([H])([H])[H])C([H])([H])[H]	2.68255	6.2760479999999985	1.970992	6.260803679999999	1.1185126399999996	2.7713165
[H]C1SC(=C(C=1[H])C1C(=NC(=C(C2SC(=C([H])C=2[H])C([H])([H])[H])C=1C([H])([H])[H])C([H])([H])[H])C([H])([H])[H])C([H])([H])[H]	3.59472	6.065747	1.1022359999999995	6.06942977	0.3192571199999996	3.5284176
[H]C1SC(=C(C=1[H])C1=C(N=C(C(C2SC(=C([H])C=2[H])C([H])([H])[H])=C1C([H])([H])[H])C([H])([H])[H])C([H])([H])[H])C([H])([H])[H]	3.5681599999999998	6.1038760000000005	1.110976	6.104127160000001	0.32729791999999946	3.5063728
[H]C1=NC([H])=C([H])C(=N1)C1C(=C(C2N=C([H])C([H])=C([H])N=2)C([H])=C(C=1C([H])([H])[H])C([H])([H])[H])N([H])[H]	2.74065	5.974292	1.6553399999999998	5.98620572	0.8281127999999995	2.8195395000000003
[H]C1=NC([H])=C([H])C(=N1)C1C([H])=C(C(=C(C2N=C([H])C([H])=C([H])N=2)C=1N([H])[H])C([H])([H])[H])C([H])([H])[H]	2.6452	5.9084080000000005	1.5983919999999996	5.926251280000001	0.7757206399999994	2.740316
[H]C1=NC(=C(C([H])=C1C1=C([H])N=C2C([H])=C([H])C(=C([H])N21)C([H])([H])[H])C1C2=NC([H])=C([H])N2C([H])=C(C=1[H])C([H])([H])[H])N([H])[H]	2.93238	5.572709	1.1782279999999998	5.62076519	0.3891697599999997	2.9786754
[H]C1=NC(=C(C([H])=C1C1C2=NC([H])=C([H])N2C([H])=C(C=1[H])C([H])([H])[H])C1=C([H])N=C2C([H])=C([H])C(=C([H])N21)C([H])([H])[H])N([H])[H]	2.88092	5.621576	1.2556000000000005	5.66523416	0.4603520000000003	2.9359636
[H]C1=NC(C2=C(F)N=C(C3=NC([H])=C(S3)C([H])([H])[H])N2C([H])([H])[H])=C(S1)C([H])([H])[H]	2.78962	5.7758210000000005	1.7098959999999996	5.805597110000001	0.8783043199999998	2.8601846
[H]C1=NC(C2=NC(F)=C(C3=NC([H])=C(S3)C([H])([H])[H])N2C([H])([H])[H])=C(S1)C([H])([H])[H]	2.94068	5.936890999999998	1.7296759999999998	5.952170809999998	0.8965019199999995	2.9855644000000003
[H]C1=NC(=C(F)C([H])=C1[H])C1C([H])=C(F)C(=C(C2=NC([H])=C(F)C([H])=C2[H])C=1C(F)(F)F)N([H])[H]	3.0792900000000003	6.304622	1.6440240000000002	6.28680602	0.8177020800000001	3.1006107000000007
[H]C1=NC(=C(F)C([H])=C1[H])C1=C(C(F)=C([H])C(C2=NC([H])=C(F)C([H])=C2[H])=C1C(F)(F)F)N([H])[H]	2.8344400000000003	6.265219	1.6417240000000002	6.25094929	0.8155860800000001	2.8973852000000004
[H]C1N=C(OC([H])([H])[H])C(=C(OC([H])([H])[H])C=1C1C(Cl)=C([H])C([H])=C(OC([H])([H])[H])C=1N([H])[H])C1C([H])=C(OC([H])([H])[H])C(=C([H])C=1Cl)N([H])[H]	3.4137800000000005	6.138091999999999	1.52102	6.135263719999999	0.7045383999999997	3.3782374000000006
[H]C1N=C(OC([H])([H])[H])C(=C(OC([H])([H])[H])C=1C1C([H])=C(OC([H])([H])[H])C(=C([H])C=1Cl)N([H])[H])C1C(Cl)=C([H])C([H])=C(OC([H])([H])[H])C=1N([H])[H]	3.38307	6.107789	1.5140279999999997	6.1076879900000005	0.6981057599999998	3.3527481000000003
[H]C1=NN([H])C(C2=C([H])C(C3=NN([H])C([H])=C3[N+](=O)[O-])=C(Cl)C(C#N)=C2N([H])[H])=C1[N+](=O)[O-]	2.6452	6.684547	2.678748	6.632537770000001	1.76964816	2.740316
[H]C1=NN([H])C(C2C([H])=C(C3=NN([H])C([H])=C3[N+](=O)[O-])C(=C(C#N)C=2Cl)N([H])[H])=C1[N+](=O)[O-]	2.6642900000000003	6.8318759999999985	2.7230920000000003	6.766607159999999	1.81044464	2.7561607000000006
[H]C1N=C(C2C([H])=C([H])C([H])=C3C([H])=C([H])N([H])C=23)C(=C(C=1[H])C1C([H])=C([H])C([H])=C2C=1C([H])=C([H])N2[H])N([H])[H]	2.90084	5.626399	1.3083159999999996	5.66962309	0.5088507199999999	2.9524972000000003
[H]C1=NC(=C(C([H])=C1[H])C1=C([H])C(C2C([H])=NC(=C([H])C=2[H])C([H])([H])[H])=C(C(=C1[H])[N+](=O)[O-])[N+]([O-])=NC(C([H])([H])[H])(C([H])([H])[H])C([H])([H])[H])C([H])([H])[H]	2.80041	5.612931	1.3552359999999997	5.657367209999999	0.5520171199999995	2.8691402999999998
[H]C1N=C2C(=NC=1C1C([H])=C(F)C(=C([H])C=1[H])C([H])([H])[H])C(C1C([H])=C([H])C([H])=C(F)C=1C([H])([H])[H])=C([H])N2[H]	2.92325	6.1670300000000005	1.918368	6.1615973	1.07009856	2.9710975
[H]C1N=C2C(=NC=1C1C([H])=C([H])C([H])=C(F)C=1C([H])([H])[H])C(C1C([H])=C(F)C(=C([H])C=1[H])C([H])([H])[H])=C([H])N2[H]	3.09423	6.327827	1.9479	6.307922570000001	1.0972679999999997	3.1130109
[H]C1=NC([H])=C(C2C3=NC([H])=C([H])N3N=C(C3=NC([H])=C([H])N3[H])C=2[H])N1[H]	2.5920799999999997	6.3571290000000005	2.364752	6.33458739	1.48077184	2.6962264
[H]C1=NC([H])=C(C2=NN3C(=NC([H])=C3[H])C(C3=NC([H])=C([H])N3[H])=C2[H])N1[H]	2.57797	6.335198	2.32326	6.31463018	1.4425992	2.6845151000000005
[H]C1=NC([H])=C2C(=N1)C([H])=C([H])C(=C2[H])C1N=C(C([H])=C(C2=NC([H])=C3C(=N2)C([H])=C([H])C([H])=C3[H])C=1[H])C([H])([H])[H]	2.68836	6.372417	2.2327320000000004	6.34849947	1.3593134400000002	2.7761388
[H]C1=NC2C(=NC([H])=C([H])C=2C2=C([H])C(C3C([H])=NC4C(=NC([H])=C([H])C=4[H])C=3[H])=C3C(=C2[H])C([H])([H])C(=O)N3[H])C([H])=C1[H]	2.79875	6.368958999999999	2.258952	6.3453526899999995	1.3834358399999998	2.8677625000000004
[H]C1=NC(C2C([H])=C(C(=O)N(C=2C([H])([H])[H])C([H])([H])[H])C2=NC([H])=C(N2C([H])([H])[H])C([H])([H])[H])=C(N1C([H])([H])[H])C([H])([H])[H]	2.9431700000000003	5.5598779999999985	1.3280040000000002	5.609088979999998	0.5269636799999997	2.9876311000000007
[H]C1=NC(C2C(=O)N(C(=C(C3=NC([H])=C(N3C([H])([H])[H])C([H])([H])[H])C=2[H])C([H])([H])[H])C([H])([H])[H])=C(N1C([H])([H])[H])C([H])([H])[H]	2.7730200000000003	5.5007280000000005	1.3584559999999994	5.555262480000001	0.554979519999999	2.8464066000000003
[H]C1=C([H])C(C2C([H])=C(C([H])=C([H])C=2C([H])([H])[H])C([H])([H])[H])=C(C([H])=C1C1=C([H])C(=C([H])C([H])=C1C([H])([H])[H])C([H])([H])[H])[N+](=O)[O-]	3.08427	6.684274	2.393456	6.63228934	1.5071795200000002	3.1047441000000005
[H]C1=C([H])C(C2=C([H])C(=C([H])C([H])=C2C([H])([H])[H])C([H])([H])[H])=C(C([H])=C1C1C([H])=C(C([H])=C([H])C=1C([H])([H])[H])C([H])([H])[H])[N+](=O)[O-]	3.03115	6.678086	2.383152	6.626658260000001	1.4976998400000001	3.0606545
[H]C1=NC(=C(C([H])=C1C1=C([H])N=C2C([H])=C([H])C([H])=C([H])N21)C1C([H])=C([H])C2=NC([H])=C([H])N2C=1[H])[N+](=O)[O-]	2.09325	6.31263	2.7698279999999995	6.2940933	1.8534417599999995	2.2821975
[H]C1=NC(=C(C([H])=C1C1C([H])=C([H])C2=NC([H])=C([H])N2C=1[H])C1=C([H])N=C2C([H])=C([H])C([H])=C([H])N21)[N+](=O)[O-]	2.4941400000000002	6.319	2.732568	6.2998899999999995	1.81916256	2.6149362000000007
[H]C1=C([H])C(C(=O)N([H])[H])=C(C([H])=C1C1=C([H])C(=C([H])C([H])=C1N([H])C(=O)C([H])([H])[H])[N+](=O)[O-])C1C([H])=C(C([H])=C([H])C=1[N+](=O)[O-])N([H])C(=O)C([H])([H])[H]	2.80622	7.0724800000000005	2.7707479999999998	6.9855568	1.8542881599999994	2.8739626000000005
[H]C1=C([H])C(C(=O)N([H])[H])=C(C([H])=C1C1C([H])=C(C([H])=C([H])C=1[N+](=O)[O-])N([H])C(=O)C([H])([H])[H])C1=C([H])C(=C([H])C([H])=C1N([H])C(=O)C([H])([H])[H])[N+](=O)[O-]	2.85021	7.011055000000002	2.679116	6.929660050000002	1.76998672	2.9104743
[H]C1=NC(=NC([H])=C1C1N=C([H])C(=C([H])C=1N([H])[H])C([H])([H])[H])C1=NC([H])=C(C([H])=C1C([H])([H])[H])N([H])[H]	2.69251	5.933433	1.8260919999999998	5.94902403	0.9852046400000001	2.7795833
[H]C1=NC(=NC([H])=C1C1=NC([H])=C(C([H])=C1C([H])([H])[H])N([H])[H])C1N=C([H])C(=C([H])C=1N([H])[H])C([H])([H])[H]	2.84855	6.0437249999999985	1.840536	6.049389749999999	0.99849312	2.9090965000000004
[H]C1=NC(=NC([H])=C1C1=C([H])C(Cl)=C([H])C([H])=C1F)C1C([H])=C(F)C([H])=C([H])C=1Cl	3.06352	6.790744	2.3905119999999997	6.72917704	1.5044710399999994	3.0875216
[H]C1=NC(=NC([H])=C1C1C([H])=C(F)C([H])=C([H])C=1Cl)C1=C([H])C(Cl)=C([H])C([H])=C1F	3.01953	6.781371000000001	2.4734040000000004	6.72064761	1.5807316800000004	3.0510099000000004
[H]C1N=C2C([H])=C([H])C(C3=NC(=C(C([H])=C3[H])C3=C([H])N=C4C([H])=C([H])C([H])=C([H])N43)C([H])([H])[H])=C([H])N2C=1[H]	2.96392	5.807307	1.3337079999999997	5.83424937	0.5322113599999998	3.0048536
[H]C1N=C2C([H])=C([H])C(C3C([H])=C([H])C(=NC=3C([H])([H])[H])C3=C([H])N=C4C([H])=C([H])C([H])=C([H])N43)=C([H])N2C=1[H]	2.91661	5.7856489999999985	1.4619559999999998	5.814540589999998	0.6501995199999993	2.9655863
[H]C1=C([H])C(C2C([H])=C([H])C(OC(F)(F)F)=C([H])C=2C2=C([H])C([H])=C(C(=C2[H])N([H])[H])C([H])([H])[H])=C(C(=C1[H])N([H])[H])C([H])([H])[H]	3.3399099999999997	5.961005999999999	1.895828	5.974115459999999	1.04936176	3.3169253
[H]C1=C([H])C(C2C([H])=C(OC(F)(F)F)C([H])=C([H])C=2C2=C([H])C([H])=C(C(=C2[H])N([H])[H])C([H])([H])[H])=C(C(=C1[H])N([H])[H])C([H])([H])[H]	3.3349300000000004	6.000591	1.693336	6.01013781	0.8630691199999996	3.3127919000000006
[H]C1N=C2C(=C([H])C(=C([H])N2C=1[H])C([H])([H])[H])C1C([H])=C(C([H])=C2OC([H])([H])C([H])([H])C([H])(C=12)N([H])[H])C1=C([H])N=C2C([H])=C([H])C(=C([H])N21)C([H])([H])[H]	2.78713	5.782737	1.2644320000000002	5.81189067	0.46847744	2.8581179
[H]C1N=C2C(=C([H])C(=C([H])N2C=1[H])C([H])([H])[H])C1C([H])=C2OC([H])([H])C([H])([H])C([H])(C2=C(C=1[H])C1=C([H])N=C2C([H])=C([H])C(=C([H])N21)C([H])([H])[H])N([H])[H]	2.9357	5.771362	1.1425319999999999	5.80153942	0.35632943999999966	2.9814310000000006
[H]C1=C([H])C([H])=C(C([H])=C1[H])C1C([H])=C([H])C(=C([H])C=1[H])C1C(Cl)=C(C([H])=C([H])C=1Cl)C1C([H])=C([H])C([H])=C([H])C=1C1C([H])=C([H])C([H])=C([H])C=1[H]	3.7333300000000005	6.549412	1.4320559999999998	6.509564920000001	0.62269152	3.6434639000000004
[H]C1=C([H])C([H])=C(C([H])=C1[H])C1C([H])=C([H])C(=C([H])C=1[H])C1C([H])=C([H])C(Cl)=C(C=1Cl)C1C([H])=C([H])C([H])=C([H])C=1C1C([H])=C([H])C([H])=C([H])C=1[H]	3.8951800000000008	6.6225760000000005	1.3192639999999995	6.57614416	0.5189228799999999	3.7777994000000006
[H]C1=C([H])C([H])=C(C(=S)N([H])C2C([H])=C(C3=NC(=C(C4C([H])=C([H])C([H])=C([H])C=4N([H])C(=S)C4C([H])=C([H])C([H])=C([H])C=4[H])N3[H])[N+](=O)[O-])C([H])=C([H])C=2[H])C([H])=C1[H]	2.11317	6.023523	2.790344	6.03100593	1.8723164800000003	2.2987311000000004
[H]C1=C([H])C([H])=C(C(=S)N([H])C2C([H])=C(C([H])=C([H])C=2[H])C2=C(N=C(C3C([H])=C([H])C([H])=C([H])C=3N([H])C(=S)C3C([H])=C([H])C([H])=C([H])C=3[H])N2[H])[N+](=O)[O-])C([H])=C1[H]	2.22439	6.232367999999999	2.869556	6.22105488	1.9451915199999998	2.3910437
[H]C1=NC2=C(C([H])=C(OC([H])([H])[H])C(=C2C([H])=C1[H])C1C([H])=C([H])C([H])=C(C(=O)C([H])([H])[H])C=1N([H])[H])C1=C([H])C([H])=C(C(C(=O)C([H])([H])[H])=C1[H])N([H])[H]	2.68089	5.905223	1.9502	5.92335293	1.0993839999999997	2.7699387000000004
[H]C1=NC2=C(C([H])=C(OC([H])([H])[H])C(C3=C([H])C([H])=C(C(C(=O)C([H])([H])[H])=C3[H])N([H])[H])=C2C([H])=C1[H])C1C([H])=C([H])C([H])=C(C(=O)C([H])([H])[H])C=1N([H])[H]	2.68089	5.886476999999999	1.907052	5.9062940699999995	1.0596878400000005	2.7699387000000004
[H]C1=C([H])C(=C(C(F)=C1[H])C1C(=C([H])C(=C([H])C=1C([H])([H])C([H])([H])[H])C1C([H])=C([H])C(=C([H])C=1F)[N+](=O)[O-])C([H])([H])C([H])([H])[H])[N+](=O)[O-]	3.04692	7.008507000000001	2.520692	6.927341370000001	1.62423664	3.0737436000000002
[H]C1=C([H])C(=C(C(F)=C1[H])C1=C([H])C(=C(C2C([H])=C([H])C(=C([H])C=2F)[N+](=O)[O-])C(=C1[H])C([H])([H])C([H])([H])[H])C([H])([H])C([H])([H])[H])[N+](=O)[O-]	2.93404	6.9478100000000005	2.682152	6.872107100000001	1.77277984	2.9800532000000004
[H]C1=NC([H])=C(C2=C(F)C(Cl)=C([H])C(C3=NC([H])=C([H])C(=C3[H])[N+](=O)[O-])=C2N([H])[H])C(=C1[H])[N+](=O)[O-]	2.30075	6.439939	2.981704	6.40994449	2.04836768	2.4544225
[H]C1=NC([H])=C(C2C([H])=C(Cl)C(F)=C(C3=NC([H])=C([H])C(=C3[H])[N+](=O)[O-])C=2N([H])[H])C(=C1[H])[N+](=O)[O-]	2.5314900000000002	6.499089	2.974988	6.46377099	2.04218896	2.6459367000000005
[H]C1=NC([H])=C(C2C([H])=C(C3=NC([H])=C([H])C(=C3[N+](=O)[O-])C([H])([H])[H])C([H])=C3C=2N([H])C(=O)C3(C([H])([H])[H])C([H])([H])[H])C(=C1[N+](=O)[O-])C([H])([H])[H]	2.87926	6.6126570000000005	2.670008	6.567117870000001	1.7616073600000002	2.9345858
[H]C1=NC([H])=C(C2=C([H])C(C3=NC([H])=C([H])C(=C3[N+](=O)[O-])C([H])([H])[H])=C3C(=C2[H])C(C(=O)N3[H])(C([H])([H])[H])C([H])([H])[H])C(=C1[N+](=O)[O-])C([H])([H])[H]	2.9365300000000003	6.710391	2.574052	6.65605581	1.6733278399999998	2.9821199000000007
[H]C1C([H])=C([H])C2=C(C=1[H])C1=C([H])C(C3=NN=C(C([H])=C3C([H])([H])[H])C3C([H])=C([H])C4=C(C=3[H])C3=C([H])C([H])=C([H])C(=C3N4[H])[N+](=O)[O-])=C([H])C(=C1N2[H])[N+](=O)[O-]	2.6128299999999998	6.299981	2.490976	6.28258271	1.59689792	2.7134489
[H]C1C([H])=C([H])C2=C(C=1[H])C1=C([H])C(C3=NN=C(C4C([H])=C([H])C5=C(C=4[H])C4=C([H])C([H])=C([H])C(=C4N5[H])[N+](=O)[O-])C(=C3[H])C([H])([H])[H])=C([H])C(=C1N2[H])[N+](=O)[O-]	2.63773	6.285694	2.50726	6.269581540000001	1.6118791999999997	2.7341159
[H]C1=NC(=C(C([H])=C1[H])C1C([H])=C(OC([H])([H])[H])C(=C(C=1[H])C1C([H])=NC(=C([H])C=1[H])C([H])([H])C([H])([H])[H])N([H])[H])C([H])([H])C([H])([H])[H]	3.25359	5.723769	1.0821799999999993	5.75822979	0.30080559999999945	3.2452797
[H]C1=NC(=C(C([H])=C1[H])C1C([H])=C(C([H])=C(OC([H])([H])[H])C=1N([H])[H])C1C([H])=NC(=C([H])C=1[H])C([H])([H])C([H])([H])[H])C([H])([H])C([H])([H])[H]	3.14984	5.739330000000002	1.055592	5.772390300000001	0.2763446399999996	3.1591672000000006
[H]C1=NC(C2C(=NC(Cl)=C(C3=NC([H])=C(N=C3Cl)N([H])[H])C=2[H])N([H])[H])=C(N=C1Cl)N([H])[H]	2.92906	6.203157	2.083232	6.19447287	1.2217734399999998	2.9759198000000007
[H]C1=NC(C2=C(Cl)N=C(C(C3=NC([H])=C(N=C3Cl)N([H])[H])=C2[H])N([H])[H])=C(N=C1Cl)N([H])[H]	2.81701	6.206615	2.187836	6.19761965	1.3180091200000001	2.8829183
[H]C1=NC(=C([H])S1)C1=C(F)C(F)=C([H])C(C2=NC([H])=C([H])S2)=C1N([H])[H]	2.69002	5.936618	1.790488	5.95192238	0.9524489599999999	2.7775166000000002
[H]C1=NC(=C([H])S1)C1C([H])=C(F)C(F)=C(C2=NC([H])=C([H])S2)C=1N([H])[H]	2.63607	5.944353	1.7751240000000001	5.95896123	0.9383140799999996	2.7327381000000006
[H]C1=C([H])C(=C(C([H])=C1C([H])([H])[H])C1=C([H])C(=C(Cl)C(=C1N([H])[H])C([H])([H])[H])C1=C([H])C(=C([H])C([H])=C1C([H])([H])[H])C([H])([H])[H])C([H])([H])[H]	3.47603	6.014605	0.8761920000000005	6.0228905500000005	0.11129663999999995	3.4299049000000004
[H]C1=C([H])C(=C(C([H])=C1C([H])([H])[H])C1C([H])=C(C2=C([H])C(=C([H])C([H])=C2C([H])([H])[H])C([H])([H])[H])C(=C(C=1Cl)C([H])([H])[H])N([H])[H])C([H])([H])[H]	3.55239	6.034625	0.8843800000000002	6.04110875	0.11882959999999976	3.4932837
[H]C1=NC([H])=C2C([H])=C(C([H])=C(C3C([H])=C([H])C(=C(C#N)C=3F)N([H])[H])N12)C1=C([H])C([H])=C(F)C(C#N)=C1N([H])[H]	2.68836	5.5412230000000005	1.501516	5.592112930000001	0.6865947199999995	2.7761388
[H]C1=NC([H])=C2C([H])=C(C([H])=C(C3=C([H])C([H])=C(F)C(C#N)=C3N([H])[H])N12)C1C([H])=C([H])C(=C(C#N)C=1F)N([H])[H]	2.60121	5.5658840000000005	1.4812759999999998	5.614554440000001	0.6679739199999997	2.7038043000000003
[H]C1=NC2=C(C([H])=C(OC([H])([H])[H])C(C3C([H])=C(Cl)C([H])=C([H])C=3Cl)=C2C([H])=C1[H])C1=C([H])C(Cl)=C([H])C([H])=C1Cl	2.83112	6.427927	2.047168	6.39901357	1.1885945600000003	2.8946296
[H]C1=NC2=C(C([H])=C(OC([H])([H])[H])C(C3=C([H])C(Cl)=C([H])C([H])=C3Cl)=C2C([H])=C1[H])C1C([H])=C(Cl)C([H])=C([H])C=1Cl	2.94234	6.468513	1.97412	6.43594683	1.1213904000000001	2.9869422000000005
[H]C1=C([H])C(=C([H])C(=C1F)C1C([H])=C([H])C(C(=O)N([H])[H])=C(C=1[H])C1=C([H])C(F)=C([H])C([H])=C1N([H])[H])N([H])[H]	3.0427699999999995	6.052006	1.4429119999999998	6.05692546	0.6326790399999993	3.0702990999999997
[H]C1=C([H])C(=C([H])C(=C1F)C1C([H])=C(C([H])=C([H])C=1C(=O)N([H])[H])C1=C([H])C(F)=C([H])C([H])=C1N([H])[H])N([H])[H]	3.09423	6.099690000000002	1.4296639999999998	6.100317900000001	0.6204908799999993	3.1130109
[H]C1C([H])=C([H])C(=C(C=1[H])C1=C([H])C(C(=O)Cl)=C(C([H])=C1C(=O)Cl)C1C([H])=C([H])C(=C([H])C=1[H])[N+](=O)[O-])[N+](=O)[O-]	3.07016	7.7092979999999995	3.3051760000000003	7.56506118	2.34596192	3.0930328000000005
[H]C1C([H])=C([H])C(=C(C=1[H])C1C([H])=C(C(=O)Cl)C(=C([H])C=1C(=O)Cl)C1C([H])=C([H])C(=C([H])C=1[H])[N+](=O)[O-])[N+](=O)[O-]	3.07099	7.750794000000001	3.280336	7.602822540000001	2.32310912	3.0937217000000006
[H]C1N=C(Cl)C(C2C([H])=C(C([H])=C(OC(F)(F)F)C=2N=C=S)C2=C([H])N=C(Cl)C([H])=C2N([H])[H])=C(C=1[H])N([H])[H]	3.26853	6.586449000000001	2.10476	6.54326859	1.2415792000000003	3.2576799000000003
[H]C1N=C(Cl)C(C2C([H])=C(OC(F)(F)F)C(N=C=S)=C(C=2[H])C2=C([H])N=C(Cl)C([H])=C2N([H])[H])=C(C=1[H])N([H])[H]	3.2046200000000002	6.577713	2.1215040000000003	6.5353188300000005	1.2569836800000003	3.2046346000000003
[H]C1=NC(C2C([H])=C(OC(F)(F)F)C(Cl)=C(C3=NC([H])=C(N3C([H])([H])[H])C([H])([H])[H])C=2[H])=C(N1C([H])([H])[H])C([H])([H])[H]	3.2726800000000003	6.117162	1.808244	6.11621742	0.9687844800000001	3.2611244000000004
[H]C1=NC(C2C([H])=C(C3=NC([H])=C(N3C([H])([H])[H])C([H])([H])[H])C([H])=C(OC(F)(F)F)C=2Cl)=C(N1C([H])([H])[H])C([H])([H])[H]	3.4021600000000003	6.158112	1.719556	6.15348192	0.88719152	3.3685928
[H]C(=O)C1=C([H])C(C2=NC([H])=C([H])C(=C2[H])C2C([H])=C([H])C([H])=C(C([H])=O)C=2F)=C([H])C([H])=C1F	3.13158	7.014877	2.188756	6.93313807	1.3188555199999996	3.1440114
[H]C(=O)C1=C([H])C(=C([H])C([H])=C1F)C1C([H])=C([H])N=C(C=1[H])C1C([H])=C([H])C([H])=C(C([H])=O)C=1F	3.1324099999999997	6.963553	2.18986	6.88643323	1.3198711999999997	3.1447003000000002
[H]C1N=C(OC([H])([H])[H])C2C(=NN([H])C=2C2=C([H])C(=C([H])C([H])=C2C([H])([H])[H])C([H])([H])[H])C=1C1C([H])=C(C([H])=C([H])C=1C([H])([H])[H])C([H])([H])[H]	3.06684	6.029438	1.6601239999999997	6.03638858	0.8325140799999993	3.0902772
[H]C1N=C(OC([H])([H])[H])C2C(=NN([H])C=2C2C([H])=C(C([H])=C([H])C=2C([H])([H])[H])C([H])([H])[H])C=1C1=C([H])C(=C([H])C([H])=C1C([H])([H])[H])C([H])([H])[H]	3.0685	6.010237	1.65074	6.01891567	0.8238807999999995	3.0916550000000003
[H]C1=C([H])C(=C2C(=NN([H])C2=C1[H])N([H])[H])C1C(F)=C(C([H])=C([H])C=1[N+](=O)[O-])C1=C([H])C([H])=C2C(=NN([H])C2=C1[H])N([H])[H]	2.53315	5.953544	2.611128	5.96732504	1.70743776	2.6473145000000002
[H]C1=C([H])C(C2C([H])=C([H])C(=C(C=2F)C2=C([H])C([H])=C3C(=NN([H])C3=C2[H])N([H])[H])[N+](=O)[O-])=C2C(=NN([H])C2=C1[H])N([H])[H]	2.30573	5.9398029999999995	2.603308	5.95482073	1.70024336	2.4585559000000003
[H]C1=C([H])C(C2C([H])=C([H])C(C3=C([H])C([H])=C(C(=C3[H])C([H])(C([H])([H])[H])C([H])([H])[H])N([H])[H])=C(C=2[H])N([H])[H])=C(C(=C1[H])C([H])(C([H])([H])[H])C([H])([H])[H])N([H])[H]	3.3424	5.647419999999999	0.8456480000000006	5.6887522	0.08319616000000085	3.318992
[H]C1=C([H])C(C2C([H])=C([H])C(=C([H])C=2N([H])[H])C2=C([H])C([H])=C(C(=C2[H])C([H])(C([H])([H])[H])C([H])([H])[H])N([H])[H])=C(C(=C1[H])C([H])(C([H])([H])[H])C([H])([H])[H])N([H])[H]	3.3589999999999995	5.529484	0.8354359999999996	5.58143044	0.07380111999999972	3.33277
[H]C1=C(Cl)C(=C([H])C(C2=C([H])C(=C(F)C(=C2[H])C([H])([H])[H])C2=C(Cl)C(=C([H])C([H])=C2N([H])[H])C([H])([H])[H])=C1N([H])[H])C([H])([H])[H]	3.1448599999999995	6.0915	1.140232	6.092865	0.35421343999999966	3.1550338
[H]C1=C(Cl)C(=C([H])C(C2C([H])=C(C([H])=C(C=2F)C([H])([H])[H])C2=C(Cl)C(=C([H])C([H])=C2N([H])[H])C([H])([H])[H])=C1N([H])[H])C([H])([H])[H]	3.21126	6.031895	1.0259679999999998	6.0386244499999995	0.24909055999999996	3.2101458000000003
[H]C1=C([H])C(C2N=C(C3=NC(=C([H])N3C=2[H])C([H])([H])[H])C2=C([H])C([H])=C3C(=C2[H])C([H])([H])C([H])([H])C(=O)N3[H])=C2C(=C1[H])C([H])([H])C([H])([H])C(=O)N2[H]	2.7946	6.1506500000000015	1.946244	6.146691500000001	1.0957444799999996	2.864318
[H]C1=C([H])C(C2=NC(C3=C([H])C([H])=C4C(=C3[H])C([H])([H])C([H])([H])C(=O)N4[H])=C([H])N3C2=NC(=C3[H])C([H])([H])[H])=C2C(=C1[H])C([H])([H])C([H])([H])C(=O)N2[H]	2.90997	6.203703	1.9059480000000004	6.19496973	1.0586721600000004	2.9600751
[H]C1N=C(C2C([H])=C(Cl)C(F)=C([H])C=2[H])C(=C(C=1C1C([H])=C([H])C([H])=C(Cl)C=1F)C([H])([H])[H])[N+](=O)[O-]	2.97969	7.310536	2.74324	7.20218776	1.8289808	3.0179427000000003
[H]C1N=C(C2C([H])=C([H])C([H])=C(Cl)C=2F)C(=C(C=1C1C([H])=C(Cl)C(F)=C([H])C=1[H])C([H])([H])[H])[N+](=O)[O-]	2.9846699999999995	7.310080999999999	2.709292	7.201773709999999	1.79774864	3.0220760999999996
[H]C1N=C(N=C2C([H])=C([H])C(=C([H])C=12)C1SC([H])=C(C(=O)C([H])([H])[H])C=1[H])C1SC([H])=C([H])C=1C(=O)C([H])([H])[H]	2.7356700000000003	6.314086	2.5817799999999997	6.29541826	1.6804375999999994	2.8154061000000006
[H]C1N=C(N=C2C([H])=C([H])C(=C([H])C=12)C1SC([H])=C([H])C=1C(=O)C([H])([H])[H])C1SC([H])=C(C(=O)C([H])([H])[H])C=1[H]	2.4816900000000004	6.185139	2.646364	6.1780764900000005	1.7398548800000002	2.6046027000000005
[H]C1N=C(OC([H])([H])[H])C2C(=NN([H])C=2C2=NC([H])=C(C3C4=NN([H])C([H])=C4C(=NC=3[H])OC([H])([H])[H])N2C([H])([H])[H])C=1[H]	2.6667799999999997	5.840067	1.808152	5.864060970000001	0.9686998399999993	2.7582274
[H]C1N=C(OC([H])([H])[H])C2C(=NN([H])C=2C2=C([H])N=C(C3C4=NN([H])C([H])=C4C(=NC=3[H])OC([H])([H])[H])N2C([H])([H])[H])C=1[H]	2.64354	5.726954	1.841088	5.76112814	0.99900096	2.7389381999999998
[H]C1=C([H])C(C(=O)Cl)=C([H])C(=C1[H])C1C([H])=C([H])C(C(=O)C([H])([H])[H])=C(C=1[H])C1C([H])=C([H])C([H])=C(C(=O)Cl)C=1[H]	3.0585400000000003	6.8866580000000015	2.411212	6.816458780000001	1.52351504	3.0833882000000004
[H]C1=C([H])C(C(=O)Cl)=C([H])C(=C1[H])C1C([H])=C(C([H])=C([H])C=1C(=O)C([H])([H])[H])C1C([H])=C([H])C([H])=C(C(=O)Cl)C=1[H]	3.01455	6.86773	2.402472	6.7992343	1.5154742399999996	3.0468764999999998
[H]C(=O)C1=C([H])C([H])=C([H])C(=C1[H])C1C([H])=C(C([H])=C(C=1Cl)C([H])([H])[H])C1C([H])=C([H])C([H])=C([H])C=1C([H])=O	2.8344400000000003	6.670078	2.071364	6.61937098	1.2108548800000003	2.8973852000000004
[H]C(=O)C1=C([H])C([H])=C([H])C(=C1[H])C1=C([H])C(=C(Cl)C(=C1[H])C([H])([H])[H])C1C([H])=C([H])C([H])=C([H])C=1C([H])=O	2.7356700000000003	6.6769940000000005	2.11534	6.625664540000001	1.2513128	2.8154061000000006
[H]C1=NC2C(OC([H])([H])[H])=C(C([H])=C([H])C=2C([H])=C1[H])C1C(=NC([H])=C(C2=C([H])C([H])=C(OC([H])([H])[H])C3N=C([H])C([H])=C([H])C=32)C=1C([H])([H])[H])N([H])[H]	2.8742799999999997	5.968013	1.7126560000000002	5.98049183	0.88084352	2.9304524
[H]C1=NC2C(OC([H])([H])[H])=C(C([H])=C([H])C=2C([H])=C1[H])C1=C([H])N=C(C(C2=C([H])C([H])=C(OC([H])([H])[H])C3N=C([H])C([H])=C([H])C=32)=C1C([H])([H])[H])N([H])[H]	2.8684699999999994	5.972563	1.6987639999999995	5.98463233	0.8680628799999992	2.9256300999999993
[H]C1=NC(C2=C([H])C(Cl)=C(C3=NC([H])=C(C([H])=C3[H])C([H])([H])[H])C([H])=C2F)=C(C([H])=C1[H])C([H])([H])[H]	3.5590300000000004	6.7018369999999985	1.7369440000000005	6.648271669999999	0.9031884799999998	3.4987949000000005
[H]C1=NC(C2C([H])=C(F)C(C3=NC([H])=C(C([H])=C3[H])C([H])([H])[H])=C([H])C=2Cl)=C(C([H])=C1[H])C([H])([H])[H]	3.6436900000000003	6.721857000000001	1.6848719999999997	6.666489870000001	0.8552822399999993	3.5690627000000004
[H]C1=C(Cl)C([H])=C(C(=C1Cl)C1=C([H])C(C2C(Cl)=C([H])C(=C([H])C=2Cl)N([H])[H])=C(C(=C1[H])C([H])([H])[H])N([H])[H])N([H])[H]	3.38058	5.892938	0.9578880000000004	5.91217358	0.18645696000000012	3.3506814
[H]C1=C(Cl)C([H])=C(C(=C1Cl)C1C([H])=C(C([H])=C(C=1N([H])[H])C([H])([H])[H])C1C(Cl)=C([H])C(=C([H])C=1Cl)N([H])[H])N([H])[H]	3.37394	5.9112290000000005	1.0105120000000003	5.92881839	0.2348710399999998	3.3451702
[H]C1=NC2=NN([H])C(C3C([H])=C(C([H])=C(F)C=3Cl)C3C([H])=NC4=NN([H])C([H])=C4C=3[H])=C2C([H])=C1[H]	2.90748	6.398898000000001	2.1168119999999995	6.3725971800000005	1.2526670399999995	2.9580084
[H]C1=NC2=NN([H])C(C3C([H])=C(F)C(Cl)=C(C=3[H])C3C([H])=NC4=NN([H])C([H])=C4C=3[H])=C2C([H])=C1[H]	2.93321	6.4492210000000005	2.088292	6.41839111	1.22642864	2.9793643000000003
[H]C1N=C(C([H])=C(C=1[H])C1=C([H])C(=C(Cl)C(=C1N([H])[H])C([H])([H])[H])C1N=C(C([H])=C([H])C=1[H])N([H])[H])N([H])[H]	3.15897	5.898853000000001	1.2666399999999998	5.917556230000001	0.4705087999999993	3.1667451
[H]C1N=C(C([H])=C(C=1[H])C1C([H])=C(C2N=C(C([H])=C([H])C=2[H])N([H])[H])C(=C(C=1Cl)C([H])([H])[H])N([H])[H])N([H])[H]	3.34323	5.9211480000000005	1.2121759999999997	5.93784468	0.42040191999999976	3.3196809000000003
[H]C1=C([H])C(=C(C2C([H])=C([H])C(=C(OC([H])(F)F)C=2[H])C2C([H])=C([H])C(=C([H])C=2C([H])([H])[H])N([H])[H])C(=C1[H])C([H])([H])[H])N([H])[H]	3.50923	5.905496	1.1744560000000002	5.92360136	0.3856995200000002	3.4574609
[H]C1=C([H])C(=C(C2C([H])=C([H])C(=C([H])C=2OC([H])(F)F)C2C([H])=C([H])C(=C([H])C=2C([H])([H])[H])N([H])[H])C(=C1[H])C([H])([H])[H])N([H])[H]	3.4469800000000004	5.844981	1.1334239999999998	5.86853271	0.3479500799999995	3.4057934000000003
[H]C1=C([H])C(C2=C(F)C([H])=C(F)C([H])=C2N([H])[H])=C(C(Cl)=C1C1C(F)=C([H])C(=C([H])C=1F)N([H])[H])C([H])([H])[H]	3.51255	6.165392	1.0767520000000002	6.16010672	0.2958118399999998	3.4602165
[H]C1=C([H])C(C2C(F)=C([H])C(=C([H])C=2F)N([H])[H])=C(C(Cl)=C1C1=C(F)C([H])=C(F)C([H])=C1N([H])[H])C([H])([H])[H]	3.48101	6.192783	1.100764	6.185032530000001	0.3179028800000001	3.4340383
[H]C1=C([H])C(=C([H])C(OC([H])([H])[H])=C1C1C(F)=C([H])C(=C(F)C=1[N+](=O)[O-])C1=C([H])C([H])=C(OC([H])([H])[H])C([H])=C1C([H])([H])[H])C([H])([H])[H]	2.90997	6.528664000000001	2.5229	6.490684240000001	1.6262679999999996	2.9600751
[H]C1=C([H])C(=C([H])C(OC([H])([H])[H])=C1C1C([H])=C(F)C(C2=C([H])C([H])=C(OC([H])([H])[H])C([H])=C2C([H])([H])[H])=C(C=1F)[N+](=O)[O-])C([H])([H])[H]	2.78215	6.48644	2.5327439999999997	6.4522604	1.6353244799999995	2.8539845
[H]C1=NC([H])=C(C2=C([H])N=C(C3=NC([H])=C([H])C(=C3[H])C(F)(F)F)C3=C([H])C([H])=C([H])C([H])=C23)C(=C1[H])C(F)(F)F	2.9431700000000003	6.575164999999999	2.393272	6.5330001499999995	1.50701024	2.9876311000000007
[H]C1=NC([H])=C(C2=NC([H])=C(C3=NC([H])=C([H])C(=C3[H])C(F)(F)F)C3=C([H])C([H])=C([H])C([H])=C23)C(=C1[H])C(F)(F)F	2.86515	6.5514139999999985	2.434488	6.511386739999999	1.54492896	2.9228745
[H]C1=C([H])C(C2N=C(C3=C([H])C([H])=C4OC([H])([H])C([H])([H])C4=C3[H])N(C=2[H])C([H])([H])[H])=C2OC([H])([H])C([H])([H])C2=C1[H]	3.15897	5.487897	0.814368	5.5435862700000005	0.05441856000000023	3.1667451
[H]C1=C([H])C(C2=NC(C3=C([H])C([H])=C4OC([H])([H])C([H])([H])C4=C3[H])=C([H])N2C([H])([H])[H])=C2OC([H])([H])C([H])([H])C2=C1[H]	3.20545	5.4981800000000005	0.9873279999999998	5.5529438	0.21354176000000002	3.2053235
[H]C1=C([H])C(=C([H])C(=C1Cl)C1C([H])=C(OC(F)(F)F)C(=C(C=1[H])C1=C([H])C(Cl)=C([H])C([H])=C1C([H])([H])[H])N([H])[H])C([H])([H])[H]	3.3515300000000003	6.11516	1.7160599999999997	6.1143956	0.8839751999999992	3.3265699000000004
[H]C1=C([H])C(=C([H])C(=C1Cl)C1C([H])=C(C([H])=C(OC(F)(F)F)C=1N([H])[H])C1=C([H])C(Cl)=C([H])C([H])=C1C([H])([H])[H])C([H])([H])[H]	3.31169	6.149467	1.7051119999999995	6.14561497	0.8739030400000001	3.2935027000000003
[H]C1=C([H])C(C(=O)OC([H])([H])[H])=C(C([H])=C1C1C([H])=C(F)C(=C([H])C=1C(F)(F)F)N([H])[H])C1=C(C(F)=C([H])C([H])=C1C(F)(F)F)N([H])[H]	3.1299200000000003	6.349667	1.915792	6.32779697	1.0677286399999995	3.1426336000000004
[H]C1=C([H])C(C(=O)OC([H])([H])[H])=C(C([H])=C1C1=C(C(F)=C([H])C([H])=C1C(F)(F)F)N([H])[H])C1C([H])=C(F)C(=C([H])C=1C(F)(F)F)N([H])[H]	3.1847	6.3930739999999995	1.9142279999999998	6.3672973399999995	1.0662897599999992	3.188101
[H]C1=NC([H])=C2C(=N1)C([H])=C([H])C(C1=NN(C(=N1)C1=NC([H])=C3C(=N1)C([H])=C([H])C([H])=C3[H])C([H])([H])C1C([H])=C([H])C([H])=C([H])C=1[H])=C2[H]	2.94234	6.656974000000001	2.2263839999999995	6.607446340000001	1.3534732799999993	2.9869422000000005
[H]C1=NC([H])=C2C(=N1)C([H])=C([H])C(C1=NC(=NN1C([H])([H])C1C([H])=C([H])C([H])=C([H])C=1[H])C1=NC([H])=C3C(=N1)C([H])=C([H])C([H])=C3[H])=C2[H]	2.9680699999999995	6.6032839999999995	2.311484	6.558588439999999	1.43176528	3.0082980999999998
[H]C1C([H])=C([H])C(=C(N=C=S)C=1[H])C1C([H])=C(C2C([H])=C([H])C(N=C=S)=C([H])C=2[H])C(=C([H])C=1OC([H])([H])[H])C([H])([H])[H]	3.5009300000000003	6.0642	1.5968280000000001	6.068021999999999	0.77428176	3.4505719000000004
[H]C1C([H])=C([H])C(=C(N=C=S)C=1[H])C1=C([H])C(=C(OC([H])([H])[H])C([H])=C1C([H])([H])[H])C1C([H])=C([H])C(N=C=S)=C([H])C=1[H]	3.51255	6.129993	1.5683999999999996	6.12789363	0.7481279999999995	3.4602165
[H]C1=C([H])C(=C(C([H])=C1C([H])([H])[H])C1C([H])=C(C([H])=C2C=1OC([H])([H])C2([H])[H])C1=C([H])C(=C([H])C([H])=C1C([H])([H])[H])C([H])([H])[H])C([H])([H])[H]	3.53579	5.909955	0.9193399999999999	5.92765905	0.15099280000000004	3.4795057000000003
[H]C1=C([H])C(=C(C([H])=C1C([H])([H])[H])C1=C([H])C(=C2OC([H])([H])C([H])([H])C2=C1[H])C1=C([H])C(=C([H])C([H])=C1C([H])([H])[H])C([H])([H])[H])C([H])([H])[H]	3.5548800000000003	5.923878	0.9467559999999996	5.94032898	0.17621551999999951	3.4953504000000004
[H]C(=O)C1=C([H])C(C2=NC(C3C([H])=C([H])C([H])=C(C([H])=O)C=3OC([H])(C([H])([H])[H])C([H])([H])[H])=C(N=C2Cl)N([H])[H])=C([H])C([H])=C1OC([H])(C([H])([H])[H])C([H])([H])[H]	2.88341	6.418826999999999	2.255456	6.390732569999999	1.3802195199999998	2.9380303000000003
[H]C(=O)C1=C([H])C(=C([H])C([H])=C1OC([H])(C([H])([H])[H])C([H])([H])[H])C1N=C(C(Cl)=NC=1N([H])[H])C1C([H])=C([H])C([H])=C(C([H])=O)C=1OC([H])(C([H])([H])[H])C([H])([H])[H]	2.85021	6.4559549999999986	2.275328	6.424519049999999	1.3985017599999998	2.9104743
[H]C1=C([H])C(=C(Cl)C([H])=C1F)C1C([H])=C(F)C(=C(C2=C([H])C([H])=C(Cl)C([H])=C2F)C=1N([H])[H])C([H])([H])[H]	3.16146	6.179588	1.245572	6.17302508	0.4511262399999998	3.1688118000000003
[H]C1=C([H])C(=C(Cl)C([H])=C1F)C1C(=C(C([H])=C(F)C=1C([H])([H])[H])C1=C([H])C([H])=C(Cl)C([H])=C1F)N([H])[H]	3.2062800000000005	6.211347	1.2621320000000005	6.20192577	0.46636144	3.2060124000000005
[H]C1=C([H])C(=C(C(F)=C1[H])C1C([H])=C(C([H])=C(C#N)C=1F)C1C([H])=C([H])C(=C([H])C=1F)[N+](=O)[O-])[N+](=O)[O-]	3.0070799999999998	7.4143669999999995	2.7682640000000003	7.29667397	1.8520028800000001	3.0406763999999997
[H]C1=C([H])C(=C(C(F)=C1[H])C1C([H])=C(C#N)C(F)=C(C=1[H])C1C([H])=C([H])C(=C([H])C=1F)[N+](=O)[O-])[N+](=O)[O-]	3.0253400000000004	7.347482	2.75198	7.23580862	1.8370216	3.0558322
[H]C1=C(Cl)N=C(C(=C1[H])C1C([H])=C([H])C(=C([H])C=1C#N)C1=C(Cl)N=C(C([H])=C1[H])N([H])[H])N([H])[H]	3.34323	6.2371	1.6833999999999998	6.2253609999999995	0.8539279999999998	3.3196809000000003
[H]C1=C(Cl)N=C(C(=C1[H])C1C([H])=C([H])C(=C(C#N)C=1[H])C1=C(Cl)N=C(C([H])=C1[H])N([H])[H])N([H])[H]	3.16561	6.2372819999999995	1.7522159999999998	6.22552662	0.9172387199999994	3.1722563
[H]C1=NN2C(=N1)C(=NC(C1N=C([H])C(=C([H])C=1OC([H])([H])[H])[N+](=O)[O-])=C2[H])C1=NC([H])=C(OC([H])([H])[H])C([H])=C1[N+](=O)[O-]	2.61615	6.868822	3.034328	6.80022802	2.09678176	2.7162045000000004
[H]C1=NN2C(=N1)C(=NC(C1=NC([H])=C(OC([H])([H])[H])C([H])=C1[N+](=O)[O-])=C2[H])C1N=C([H])C(=C([H])C=1OC([H])([H])[H])[N+](=O)[O-]	2.7057900000000004	6.8829270000000005	3.00498	6.813063570000001	2.0697816	2.7906057000000004
[H]C1=C([H])C(=C([H])C(C2C([H])=C(F)C(C#N)=C(C=2[H])C2=C([H])C(=C([H])C([H])=C2C([H])([H])[H])[N+](=O)[O-])=C1[N+](=O)[O-])C([H])([H])[H]	3.13822	7.313903	2.598064	7.2052517300000005	1.69541888	3.1495226
[H]C1=C([H])C(=C([H])C(C2C([H])=C(C([H])=C(F)C=2C#N)C2=C([H])C(=C([H])C([H])=C2C([H])([H])[H])[N+](=O)[O-])=C1[N+](=O)[O-])C([H])([H])[H]	3.03198	7.3322850000000015	2.62088	7.221979350000002	1.7164096	3.0613434
[H]C1=C([H])C(Cl)=C(C(Cl)=C1[H])C1C([H])=C(C(F)=C([H])C=1Cl)C1C([H])=C([H])C(Cl)=C([H])C=1Cl	3.9258900000000003	7.1225299999999985	1.5049199999999998	7.031102299999999	0.6897263999999996	3.8032887000000004
[H]C1=C([H])C(Cl)=C(C(Cl)=C1[H])C1=C([H])C(=C(Cl)C([H])=C1F)C1C([H])=C([H])C(Cl)=C([H])C=1Cl	3.8130099999999993	6.9775670000000005	1.609616	6.8991859700000004	0.7860467199999999	3.7095982999999997
[H]C1=NN2C(=N1)C([H])=C([H])C([H])=C2C1C([H])=C2C(N=C([H])N2[H])=C(C2=NN3C(=N2)C([H])=C([H])C([H])=C3[H])C=1N([H])[H]	2.66014	6.6177529999999996	2.31682	6.571755229999999	1.4366743999999998	2.7527162
[H]C1=NN2C(=N1)C([H])=C([H])C([H])=C2C1=C2N=C([H])N([H])C2=C([H])C(C2=NN3C(=N2)C([H])=C([H])C([H])=C3[H])=C1N([H])[H]	2.72405	6.183955999999999	2.085164	6.17699996	1.2235508799999995	2.8057615
[H]C1N=C(C([H])=C(C=1C1C([H])=C([H])C([H])=C2C=1C(=O)C(=O)N2[H])C([H])([H])[H])C1=C([H])C([H])=C2C(=O)C(=O)N([H])C2=C1[H]	1.8235	6.796932000000001	3.0387440000000003	6.73480812	2.10084448	2.0583050000000003
[H]C1N=C(C([H])=C(C=1C1=C([H])C([H])=C2C(=O)C(=O)N([H])C2=C1[H])C([H])([H])[H])C1C([H])=C([H])C([H])=C2C=1C(=O)C(=O)N2[H]	1.81022	6.7783679999999995	3.0427919999999995	6.7179148799999995	2.104568639999999	2.0472826000000004
[H]C1N=C(C([H])=C(C2=NC([H])=C(C([H])=C2C(F)(F)F)C2N=C(C([H])=C([H])C=2[H])N([H])[H])C=1[H])N([H])[H]	2.91578	6.311629	2.055448	6.29318239	1.19621216	2.9648974
[H]C1N=C(C([H])=C(C=1[H])C1=C([H])N=C(C2N=C(C([H])=C([H])C=2[H])N([H])[H])C(=C1[H])C(F)(F)F)N([H])[H]	2.91329	6.299708000000001	2.004572	6.282334280000001	1.1494062400000002	2.9628307
[H]C1=C(F)C(=C([H])C(=C1C1=C(Cl)N=C(C(=C1[H])C1C(=C([H])C([H])=C(F)C=1C([H])([H])[H])N([H])[H])N([H])[H])N([H])[H])C([H])([H])[H]	3.03696	6.089043	1.2763919999999995	6.09062913	0.47948063999999935	3.0654768000000003
[H]C1=C(F)C(=C([H])C(=C1C1C(=NC(Cl)=C(C=1[H])C1C(=C([H])C([H])=C(F)C=1C([H])([H])[H])N([H])[H])N([H])[H])N([H])[H])C([H])([H])[H]	3.21126	6.129538	1.1362759999999996	6.12747958	0.35057391999999954	3.2101458000000003
[H]C1C([H])=C(Cl)C(=C(C=1Cl)C1=C([H])C(C2C([H])=C(Cl)C(=C([H])C=2Cl)N([H])[H])=C(C(=C1[H])[N+]([O-])=NC([H])([H])[H])N([H])[H])N([H])[H]	2.53979	6.130448	2.15398	6.128307680000001	1.2868616	2.6528257
[H]C1C([H])=C(Cl)C(=C(C=1Cl)C1C([H])=C(C([H])=C(C=1N([H])[H])[N+]([O-])=NC([H])([H])[H])C1C([H])=C(Cl)C(=C([H])C=1Cl)N([H])[H])N([H])[H]	2.84523	6.15793	1.842284	6.1533163	1.00010128	2.9063409
[H]C1=NC(=C([H])C2C1=NN([H])C=2C1C([H])=C([H])C([H])=C(C=1N([H])[H])C([H])([H])C([H])([H])[H])C1=C([H])C([H])=C(C(=C1[H])C([H])([H])C([H])([H])[H])N([H])[H]	2.73484	5.597643	1.5749319999999996	5.6434551299999995	0.7541374399999992	2.8147172000000005
[H]C1=NC(=C([H])C2C1=NN([H])C=2[H])C1C([H])=C(C([H])=C(C=1N([H])[H])C([H])([H])C([H])([H])[H])C1=C2C(=NN1[H])C([H])=NC([H])=C2[H]	2.7448	5.597825	1.594252	5.64362075	0.7719118399999996	2.8229840000000004
[H]C(=O)C1C(F)=C(C([H])=C([H])C=1C1=NN=C(C([H])=C1[H])N([H])[H])C1C(=NN=C([H])C=1[H])N([H])[H]	2.77053	6.560422999999999	2.3319080000000003	6.519584929999999	1.45055536	2.8443399
[H]C(=O)C1C(F)=C(C2=NN=C(C([H])=C2[H])N([H])[H])C([H])=C([H])C=1C1C(=NN=C([H])C=1[H])N([H])[H]	2.77385	6.541404	2.3458919999999996	6.50227764	1.4634206399999998	2.8470955
[H]C(=O)C1C([H])=C([H])C(=NC=1C1=C([H])N=C([H])C([H])=C1OC([H])([H])[H])C1C([H])=NC([H])=C([H])C=1OC([H])([H])[H]	2.9464900000000003	6.980115	2.573224	6.90150465	1.6725660800000002	2.9903867
[H]C(=O)C1C([H])=C([H])C(=NC=1C1C([H])=NC([H])=C([H])C=1OC([H])([H])[H])C1=C([H])N=C([H])C([H])=C1OC([H])([H])[H]	2.88092	6.9622790000000006	2.5663240000000003	6.885273890000001	1.6662180800000002	2.9359636
[H]C1=C([H])C([H])=C(C(=O)N([H])C2C([H])=C(C([H])=C([H])C=2[H])C2C(F)=C([H])C(=C([H])C=2Cl)C2C([H])=C([H])C([H])=C([H])C=2N([H])C(=O)C2C([H])=C([H])C([H])=C([H])C=2[H])C([H])=C1[H]	3.34406	6.588450999999999	1.843296	6.545090409999999	1.0010323200000002	3.3203698
[H]C1=C([H])C([H])=C(C(=O)N([H])C2C([H])=C(C([H])=C([H])C=2[H])C2C([H])=C(F)C(=C(Cl)C=2[H])C2C([H])=C([H])C([H])=C([H])C=2N([H])C(=O)C2C([H])=C([H])C([H])=C([H])C=2[H])C([H])=C1[H]	3.4336999999999995	6.611383	1.8052080000000001	6.56595853	0.9659913600000003	3.3947709999999995
[H]C1=C([H])C(=C(Cl)C(=C1[H])C(F)(F)F)C1C([H])=C(C([H])=C(F)C=1C#N)C1=C([H])C([H])=C(Cl)C(=C1[H])C(F)(F)F	3.5839300000000005	7.200062000000001	2.2099159999999998	7.101656420000001	1.3383227199999999	3.5194619000000005
[H]C1=C([H])C(=C(Cl)C(=C1[H])C(F)(F)F)C1C([H])=C(F)C(C#N)=C(C=1[H])C1=C([H])C([H])=C(Cl)C(=C1[H])C(F)(F)F	3.57065	7.121438	2.2061439999999997	7.03010858	1.3348524799999995	3.5084395
[H]C1C(=NC(C2C([H])=C([H])C([H])=C(OC(F)(F)F)C=2N([H])[H])=C(C=1[H])N([H])[H])C1C([H])=C(OC(F)(F)F)C(=C([H])C=1[H])N([H])[H]	3.0792900000000003	5.7236780000000005	1.6510159999999998	5.75814698	0.82413472	3.1006107000000007
[H]C1C(=NC(C2C([H])=C(OC(F)(F)F)C(=C([H])C=2[H])N([H])[H])=C(C=1[H])N([H])[H])C1C([H])=C([H])C([H])=C(OC(F)(F)F)C=1N([H])[H]	2.8693	5.613021999999999	1.8329919999999997	5.657450019999999	0.9915526400000001	2.9263190000000003
[H]C1=NC(C2=NC([H])=C([H])C(C3=NC([H])=C(N=C3Cl)N([H])[H])=C2[H])=C(N=C1Cl)N([H])[H]	2.99214	6.513831	2.1710000000000003	6.477186209999999	1.3025200000000003	3.0282762
[H]C1=NC(C2C([H])=C([H])N=C(C3=NC([H])=C(N=C3Cl)N([H])[H])C=2[H])=C(N=C1Cl)N([H])[H]	2.7697	6.4665110000000015	2.2705439999999997	6.434125010000002	1.3941004799999996	2.843651
[H]C1=NC(OC([H])([H])[H])=C(C(=C1[H])C1C([H])=C([H])C2OC([H])=C(C3=NC(OC([H])([H])[H])=C(C([H])=C3[H])N([H])[H])C=2C=1[H])N([H])[H]	3.17308	5.7188550000000005	1.229012	5.75375805	0.43589103999999956	3.1784564
[H]C1=NC(OC([H])([H])[H])=C(C(=C1[H])C1=C([H])OC2C([H])=C([H])C(C3=NC(OC([H])([H])[H])=C(C([H])=C3[H])N([H])[H])=C([H])C=21)N([H])[H]	3.14818	5.682182	1.18154	5.72038562	0.3922167999999999	3.1577894000000004
[H]C1=NC([H])=C(S1)C1C([H])=NC2=NN([H])C(C3=NC([H])=C([H])S3)=C2C=1[H]	2.30822	5.963099	2.454912	5.97602009	1.56371904	2.4606226
[H]C1=NC([H])=C(S1)C1=C2C(N=C([H])C(C3=NC([H])=C([H])S3)=C2[H])=NN1[H]	2.26423	5.934069999999999	2.46172	5.949603699999999	1.5699823999999998	2.4241109
[H]C1C2=NN([H])C(C3C([H])=C([H])C4N=C(SC=4C=3[H])C3C([H])=C([H])C4=NN([H])C([H])=C4C=3[H])=C2C([H])=C([H])C=1[H]	2.6402200000000002	5.8364270000000005	2.18204	5.86074857	1.3126768000000002	2.7361826000000002
[H]C1C2=NN([H])C(C3=NC4C([H])=C([H])C(=C([H])C=4S3)C3C([H])=C([H])C4=NN([H])C([H])=C4C=3[H])=C2C([H])=C([H])C=1[H]	2.61698	5.7840110000000005	2.110188	5.81305001	1.24657296	2.7168934
[H]C1=NN2C(=N1)C(=NC([H])=C2[H])C1C([H])=C(C([H])=C(C=1N([H])[H])C([H])(C([H])([H])[H])C([H])([H])[H])C1=C([H])N=C([H])C2=NC([H])=NN21	2.65765	5.952088	1.989852	5.96600008	1.1358638399999998	2.7506494999999997
[H]C1=NN2C(=N1)C(=NC([H])=C2[H])C1=C([H])C(=C(C(=C1[H])C([H])(C([H])([H])[H])C([H])([H])[H])N([H])[H])C1=C([H])N=C([H])C2=NC([H])=NN21	2.47256	5.812403	1.948268	5.83888673	1.09760656	2.5970248000000002
[H]C1=NC([H])=C2C(=N1)C([H])=C([H])C(=C2[H])C1C([H])=C(N=C(C=1[H])C([H])([H])[H])C1=NC([H])=C2C(=N1)C([H])=C([H])C([H])=C2[H]	2.90499	6.5993710000000005	2.382416	6.555027610000001	1.49702272	2.9559417000000003
[H]C1=NC([H])=C2C(=N1)C([H])=C([H])C(=C2[H])C1N=C(C([H])=C(C2=NC([H])=C3C(=N2)C([H])=C([H])C([H])=C3[H])C=1[H])C([H])([H])[H]	2.8776	6.660341000000001	2.297592	6.6105103100000004	1.4189846399999997	2.9332080000000005
[H]C1=C([H])C(C2C([H])=C([H])C(=C([H])C=2OC([H])(F)F)C2C([H])=C(F)C(=C([H])C=2[H])C([H])([H])[H])=C(C(F)=C1[H])C([H])([H])[H]	3.6005300000000005	6.540039	1.3808119999999997	6.5010354900000005	0.57554704	3.5332399000000008
[H]C1=C([H])C(C2C([H])=C([H])C(=C(OC([H])(F)F)C=2[H])C2C([H])=C(F)C(=C([H])C=2[H])C([H])([H])[H])=C(C(F)=C1[H])C([H])([H])[H]	3.60468	6.59655	1.4062039999999998	6.5524605000000005	0.5989076799999999	3.5366844000000004
[H]C(=O)C1C([H])=C(C([H])=C([H])C=1C1C([H])=C(C(=C([H])C=1I)[N+](=O)[O-])C([H])([H])[H])C1C(I)=C([H])C([H])=C(C=1[N+](=O)[O-])C([H])([H])[H]	2.86017	6.85226	2.50772	6.7851566000000005	1.6123024	2.9187411
[H]C(=O)C1C([H])=C(C([H])=C([H])C=1C1C(I)=C([H])C([H])=C(C=1[N+](=O)[O-])C([H])([H])[H])C1C([H])=C(C(=C([H])C=1I)[N+](=O)[O-])C([H])([H])[H]	2.97886	6.858720999999999	2.49622	6.791036109999999	1.6017223999999999	3.0172538
[H]C1=NC(=C(S1)C1=C([H])C(C2=NC(=C([H])S2)C([H])([H])[H])=C(Cl)C(Cl)=C1N([H])[H])C([H])([H])[H]	2.75642	5.990308	2.036036	6.00078028	1.1783531199999997	2.8326286
[H]C1=NC(=C(S1)C1C([H])=C(C2=NC(=C([H])S2)C([H])([H])[H])C(=C(Cl)C=1Cl)N([H])[H])C([H])([H])[H]	2.75061	5.995222	1.958388	6.00525202	1.1069169600000004	2.8278063
[H]C1=NC(C2C([H])=C(C3=NC([H])=C(C(=C3[H])C([H])([H])[H])N([H])[H])C(=C(C#N)C=2F)N([H])[H])=C(C(=C1[H])C([H])([H])[H])N([H])[H]	2.90831	5.89403	1.5029880000000002	5.9131673	0.6879489599999999	2.9586973000000003
[H]C1=NC(C2=C([H])C(C3=NC([H])=C(C(=C3[H])C([H])([H])[H])N([H])[H])=C(F)C(C#N)=C2N([H])[H])=C(C(=C1[H])C([H])([H])[H])N([H])[H]	2.95894	5.824506	1.427088	5.849900460000001	0.6181209599999997	3.0007202
[H]C1=NC2C(C([H])=C1[H])=C([H])C([H])=C([H])C=2C1C([H])=C([H])N=C(C2C([H])=C([H])C([H])=C3N=C([H])C([H])=C([H])C=23)C=1N([H])[H]	3.01538	6.165028	1.8797279999999998	6.15977548	1.03454976	3.0475654
[H]C1=NC2C(C([H])=C1[H])=C([H])C([H])=C([H])C=2C1=NC([H])=C([H])C(C2C([H])=C([H])C([H])=C3N=C([H])C([H])=C([H])C=23)=C1N([H])[H]	2.78298	6.059195	1.955628	6.06346745	1.1043777600000002	2.8546734000000002
[H]C1=NC2C(=C([H])C([H])=C([H])C=2C([H])=C1[H])C1N=C(C(=O)N(C=1[H])C([H])([H])[H])C1=NC2C([H])=C([H])C([H])=C([H])C=2C([H])=C1[H]	2.70745	6.2155330000000015	2.20872	6.205735030000001	1.3372224	2.7919835
[H]C1=NC2C(C3=NC(C4=NC5C([H])=C([H])C([H])=C([H])C=5C([H])=C4[H])=C([H])N(C3=O)C([H])([H])[H])=C([H])C([H])=C([H])C=2C([H])=C1[H]	2.51323	6.131449	2.379932	6.12921859	1.4947374399999998	2.6307809000000004
[H]C1=NC2C([H])=C(C([H])=C([H])C=2C([H])=C1[H])C1C([H])=C([H])C(C2=NC3C([H])=C([H])C([H])=C([H])C=3C([H])=C2[H])=C([H])C=1C(F)(F)F	3.23367	6.589088	2.0183720000000003	6.545670080000001	1.1621022400000003	3.2287461000000004
[H]C1=NC2C([H])=C(C([H])=C([H])C=2C([H])=C1[H])C1C([H])=C([H])C(C2=NC3C([H])=C([H])C([H])=C([H])C=3C([H])=C2[H])=C(C=1[H])C(F)(F)F	3.22371	6.598279	2.05508	6.5540338899999995	1.1958735999999996	3.2204793
[H]C1=NC2=NN([H])C(C3=C([H])C([H])=C4C(C(=O)C(=O)N4C([H])([H])C([H])([H])[H])=C3[H])=C2C([H])=C1C1C([H])=C([H])C([H])=C2C(=O)C(=O)N(C=12)C([H])([H])C([H])([H])[H]	1.7014900000000002	6.419646	2.9552080000000003	6.39147786	2.02399136	1.9570367000000002
[H]C1=NC2=NN([H])C(=C2C([H])=C1C1=C([H])C([H])=C2C(C(=O)C(=O)N2C([H])([H])C([H])([H])[H])=C1[H])C1C([H])=C([H])C([H])=C2C(=O)C(=O)N(C=12)C([H])([H])C([H])([H])[H]	1.70813	6.399353	2.9681800000000003	6.3730112299999995	2.0359256	1.9625479000000001
[H]C1=C([H])C(=C(Cl)C(OC(F)(F)F)=C1[H])C1C(F)=C([H])C(=C([H])C=1F)C1C([H])=C(OC(F)(F)F)C(Cl)=C([H])C=1[H]	3.621280000000001	6.925333	1.970348	6.85165303	1.1179201599999997	3.5504624000000007
[H]C1=C([H])C(=C(Cl)C(OC(F)(F)F)=C1[H])C1C([H])=C(F)C(=C(F)C=1[H])C1C([H])=C(OC(F)(F)F)C(Cl)=C([H])C=1[H]	3.62211	6.8902980000000005	1.940172	6.81977118	1.09015824	3.5511513000000003
[H]C1=C([H])C(C2=C(C([H])=C([H])C(C3=C([H])C([H])=C4C(=C3[H])C([H])([H])C(=O)N4[H])=C2C([H])([H])[H])N([H])[H])=C2C(=C1[H])C([H])([H])C(=O)N2[H]	3.41295	5.774911	0.7684600000000001	5.80476901	0.01218319999999995	3.3775485
[H]C1=C([H])C(C2C([H])=C([H])C(=C(C3=C([H])C([H])=C4C(=C3[H])C([H])([H])C(=O)N4[H])C=2C([H])([H])[H])N([H])[H])=C2C(=C1[H])C([H])([H])C(=O)N2[H]	3.4154400000000003	5.73114	0.7771999999999997	5.7649374	0.020223999999999798	3.3796152000000004
[H]C1N=C2C(=C([H])C(Cl)=C([H])N2C=1[H])C1C([H])=C(C(=NC=1C([H])([H])[H])C([H])([H])[H])C1=C([H])N=C2C([H])=C([H])C(Cl)=C([H])N21	2.82448	6.113886	1.547516	6.11323626	0.7289147199999997	2.8891184
[H]C1N=C2C(=C([H])C(Cl)=C([H])N2C=1[H])C1C(=NC(=C(C=1[H])C1=C([H])N=C2C([H])=C([H])C(Cl)=C([H])N21)C([H])([H])[H])C([H])([H])[H]	2.80705	6.149831	1.587904	6.14594621	0.7660716799999996	2.8746514999999997
[H]C1C([H])=C([H])C(=C(C=1[H])C1=C([H])C(=C(F)C(=C1N([H])[H])C([H])([H])[H])C1C([H])=C([H])C(=C([H])C=1[H])N([H])[H])N([H])[H]	3.3291199999999987	5.551506	0.7939439999999998	5.60147046	0.03562847999999974	3.307969599999999
[H]C1C([H])=C([H])C(=C(C=1[H])C1C([H])=C(C2C([H])=C([H])C(=C([H])C=2[H])N([H])[H])C(=C(C=1F)C([H])([H])[H])N([H])[H])N([H])[H]	3.29509	5.661161	0.92164	5.70125651	0.15310880000000004	3.2797247
[H]C1=NC(=C(C([H])=C1C1C([H])=C([H])C([H])=C(C=1N([H])[H])C([H])([H])N(C([H])([H])[H])C1([H])C([H])([H])C([H])([H])C([H])([H])C([H])([H])C1([H])[H])C1=C([H])C([H])=C(C(=C1[H])C([H])([H])N(C([H])([H])[H])C1([H])C([H])([H])C([H])([H])C([H])([H])C([H])([H])C1([H])[H])N([H])[H])C([H])([H])C([H])([H])[H]	3.41793	5.939348000000001	1.1343439999999996	5.954406680000001	0.34879647999999985	3.3816819000000002
[H]C1=NC(=C(C([H])=C1C1=C([H])C([H])=C(C(=C1[H])C([H])([H])N(C([H])([H])[H])C1([H])C([H])([H])C([H])([H])C([H])([H])C([H])([H])C1([H])[H])N([H])[H])C1C([H])=C([H])C([H])=C(C=1N([H])[H])C([H])([H])N(C([H])([H])[H])C1([H])C([H])([H])C([H])([H])C([H])([H])C([H])([H])C1([H])[H])C([H])([H])C([H])([H])[H]	3.3092	5.866821	1.0199879999999997	5.88840711	0.2435889599999994	3.291436
[H]C1N=C(Cl)C(C2C([H])=C(F)C(F)=C(C=2[H])C2=C([H])N=C(Cl)C([H])=C2C([H])([H])[H])=C(C=1[H])C([H])([H])[H]	3.83044	6.98785	1.4966400000000002	6.9085435	0.6821088	3.7240652
[H]C1N=C(Cl)C(C2C([H])=C(C([H])=C(F)C=2F)C2=C([H])N=C(Cl)C([H])=C2C([H])([H])[H])=C(C=1[H])C([H])([H])[H]	3.82961	7.060650000000001	1.493144	6.9747915	0.67889248	3.7233763000000004
[H]C1=NC([H])=C(C2=NC([H])=C(C3=NC([H])=C([H])C4=NSN=C43)C(=N2)C([H])([H])[H])C2=NSN=C12	2.56884	6.894392999999999	3.613928	6.823497629999999	2.6300137599999998	2.6769372000000002
[H]C1=NC([H])=C(C2=NSN=C12)C1C(=NC(=NC=1[H])C1=NC([H])=C([H])C2=NSN=C12)C([H])([H])[H]	2.4509800000000004	6.8715519999999986	3.700684	6.802712319999999	2.7098292799999997	2.5791134000000007
[H]C1=NC([H])=C(C([H])=N1)C1C([H])=C([H])C2SC(=NC=2C=1[H])C1N=C([H])C([H])=C([H])N=1	3.0427699999999995	6.558057000000001	2.378736	6.517431870000001	1.4936371199999998	3.0702990999999997
[H]C1=NC([H])=C(C([H])=N1)C1=NC2C([H])=C(C3N=C([H])C([H])=C([H])N=3)C([H])=C([H])C=2S1	3.03613	6.535125	2.35868	6.49656375	1.4751856	3.0647879000000002
[H]C1=NC(C2C([H])=C([H])C3C([H])=C([H])C(=NC=3C=2[H])C2=NC([H])=C(N2[H])C([H])([H])[H])=C(N1[H])C([H])([H])[H]	2.87345	5.8610880000000005	1.726916	5.88319008	0.8939627200000002	2.9297635
[H]C1=NC(C2=NC3C([H])=C(C4=NC([H])=C(N4[H])C([H])([H])[H])C([H])=C([H])C=3C([H])=C2[H])=C(N1[H])C([H])([H])[H]	2.8825800000000004	5.834971	1.7399799999999999	5.85942361	0.9059815999999996	2.9373414
[H]C1N=C(C([H])=C(C=1[H])C1C([H])=C(C([H])=C(OC(F)(F)F)C=1Cl)C1N=C(C([H])=C([H])C=1[H])C([H])([H])[H])C([H])([H])[H]	3.5689900000000003	6.9730170000000005	1.9858960000000003	6.89504547	1.1322243200000006	3.5070617000000004
[H]C1N=C(C([H])=C(C=1[H])C1C([H])=C(OC(F)(F)F)C(Cl)=C(C=1[H])C1N=C(C([H])=C([H])C=1[H])C([H])([H])[H])C([H])([H])[H]	3.50259	6.8126750000000005	2.01966	6.749134250000001	1.1632872	3.4519497
[H]C(=O)C1=C([H])C(C2=NC3C([H])=C([H])C([H])=C([H])C=3C([H])=C2[H])=C([H])C(=C1OC([H])(C([H])([H])[H])C([H])([H])[H])C1C([H])=C([H])C2C([H])=C([H])C([H])=NC=2C=1[H]	2.98218	6.559058	2.13972	6.51834278	1.2737423999999997	3.0200094
[H]C(=O)C1=C([H])C(=C([H])C([H])=C1OC([H])(C([H])([H])[H])C([H])([H])[H])C1C([H])=C([H])C2C([H])=C([H])C(=NC=2C=1[H])C1C([H])=C([H])C([H])=C(C([H])=O)C=1OC([H])(C([H])([H])[H])C([H])([H])[H]	2.9913099999999995	6.5111919999999985	2.133004	6.474784719999999	1.2675636800000003	3.0275872999999995
[H]C1=C([H])C(=C([H])C(=C1[H])C(F)(F)F)C1C([H])=C(C([H])=C(C#N)C=1N([H])[H])C1C([H])=C([H])C([H])=C([H])C=1C(F)(F)F	3.06186	6.112521	1.467568	6.11199411	0.6553625599999995	3.0861438000000003
[H]C1=C([H])C(=C([H])C(=C1[H])C(F)(F)F)C1C([H])=C(C#N)C(=C(C=1[H])C1C([H])=C([H])C([H])=C([H])C=1C(F)(F)F)N([H])[H]	3.09257	6.1060599999999985	1.46122	6.106114599999999	0.6495223999999995	3.1116330999999997
[H]C1=NC(=C(OC([H])([H])C([H])([H])[H])C([H])=C1N([H])[H])C1C([H])=C(C(C2=NC([H])=C(OC([H])([H])C([H])([H])[H])C([H])=C2N([H])[H])=C([H])C=1C([H])([H])[H])C([H])([H])[H]	3.1514999999999995	5.784557	1.426628	5.813546870000001	0.6176977599999995	3.160545
[H]C1=NC(=C(OC([H])([H])C([H])([H])[H])C([H])=C1N([H])[H])C1=C([H])C(=C(C2=NC([H])=C(OC([H])([H])C([H])([H])[H])C([H])=C2N([H])[H])C([H])=C1C([H])([H])[H])C([H])([H])[H]	3.1432	5.751251	1.45662	5.78323841	0.6452903999999995	3.1536560000000002
[H]C1=NN=C(C2=C([H])C(C3=NN=C([H])C(=C3[H])C([H])([H])[H])=C3OC([H])([H])C([H])([H])C3=C2[H])C(=C1[H])C([H])([H])[H]	2.89005	6.098052	1.523688	6.09882732	0.70699296	2.9435415000000003
[H]C1=NN=C(C2C([H])=C(C3=NN=C([H])C(=C3[H])C([H])([H])[H])C([H])=C3C=2OC([H])([H])C3([H])[H])C(=C1[H])C([H])([H])[H]	2.84523	6.148739	1.5678479999999997	6.14495249	0.7476201599999994	2.9063409
[H]C1=NC([H])=C(C([H])=C1[H])C1C([H])=C([H])C(C2=NC([H])=C([H])C([H])=C2[H])=C(C=1[H])C([H])([H])C#N	3.36896	6.458138999999999	1.665644	6.4265064899999995	0.8375924799999996	3.3410368000000004
[H]C1=NC([H])=C(C([H])=C1[H])C1C([H])=C([H])C(C2=NC([H])=C([H])C([H])=C2[H])=C([H])C=1C([H])([H])C#N	3.3722800000000004	6.47006	1.693612	6.4373546	0.86332304	3.3437924000000003
[H]C1C(=O)N(C([H])=C(C=1[H])C1=C([H])C(C2C(=O)N(C([H])=C([H])C=2[H])C([H])([H])[H])=C2C(=C1[H])C([H])([H])C(=O)N2[H])C([H])([H])[H]	2.944	5.890663	1.42028	5.91010333	0.6118575999999996	2.98832
[H]C1C(=O)N(C([H])=C(C=1[H])C1C([H])=C(C([H])=C2C=1N([H])C(=O)C2([H])[H])C1C(=O)N(C([H])=C([H])C=1[H])C([H])([H])[H])C([H])([H])[H]	2.92159	5.904131	1.4145760000000005	5.92235921	0.6066099200000004	2.9697197
[H]C1=C([H])C(F)=C(C(F)=C1[H])C1C([H])=C(C([H])=C2SC(Cl)=NC=12)C1C([H])=C([H])C(F)=C([H])C=1F	3.3922	6.65297	1.934652	6.603802699999999	1.0850798399999997	3.3603259999999997
[H]C1=C([H])C(F)=C(C(F)=C1[H])C1C([H])=C2SC(Cl)=NC2=C(C=1[H])C1C([H])=C([H])C(F)=C([H])C=1F	3.3589999999999995	6.717397999999999	1.868412	6.66243218	1.0241390399999997	3.33277
[H]C1N=C(Cl)C(C2C([H])=C(F)C(=C([H])C=2F)C2=C([H])N=C(Cl)C([H])=C2N([H])[H])=C(C=1[H])N([H])[H]	3.4038199999999996	6.588997000000001	1.5314159999999999	6.54558727	0.7141027199999996	3.3699706
[H]C1N=C(Cl)C(C2=C([H])C(F)=C(C([H])=C2F)C2=C([H])N=C(Cl)C([H])=C2N([H])[H])=C(C=1[H])N([H])[H]	3.4660699999999998	6.573527	1.555244	6.531509570000001	0.7360244800000002	3.4216381
[H]C1=NC(=C([H])N=C1C1=NC([H])=C([H])N=C1N([H])[H])C1N=C(C([H])=NC=1[H])N([H])[H]	3.2394800000000004	6.035444	1.2216519999999995	6.0418540400000005	0.42911983999999936	3.2335684000000002
[H]C1=C([H])C(=C([H])C(=C1[H])C([H])([H])C#N)C1=C([H])C(C2C([H])=C([H])C([H])=C([H])C=2C([H])([H])C#N)=C(C(=C1[H])C(F)(F)F)N([H])[H]	3.19383	6.021884999999998	1.1876119999999997	6.029515349999999	0.39780303999999944	3.1956789000000003
[H]C1=NC(C2C([H])=C([H])N=C3C(C4=NC([H])=C(C([H])=C4C([H])([H])[H])N([H])[H])=C([H])C([H])=C([H])C=23)=C(C([H])=C1C([H])([H])[H])N([H])[H]	3.03696	5.977386	1.772364	5.98902126	0.9357748800000003	3.0654768000000003
[H]C1=NC(C2C3=NC([H])=C([H])C(C4=NC([H])=C(C([H])=C4C([H])([H])[H])N([H])[H])=C3C([H])=C([H])C=2[H])=C(C([H])=C1C([H])([H])[H])N([H])[H]	2.8551900000000003	6.017062	1.8328080000000002	6.02512642	0.9913833599999995	2.9146077000000004
[H]C1=NC([H])=C(F)C(=C1[H])C1=C([H])C(C2=NC([H])=C(F)C([H])=C2[H])=C(Cl)C(C#N)=C1N([H])[H]	2.96143	6.5070060000000005	1.946704	6.47097546	1.0961676799999998	3.0027869000000003
[H]C1=NC([H])=C(F)C(=C1[H])C1C([H])=C(C2=NC([H])=C(F)C([H])=C2[H])C(=C(C#N)C=1Cl)N([H])[H]	2.9025	6.465601	1.947992	6.43329691	1.0973526400000004	2.953875
[H]C1=C([H])C(=C(F)C(F)=C1OC([H])([H])[H])C1=C([H])C(F)=C(C([H])=C1[N+](=O)[O-])C1=C([H])C([H])=C(F)C(F)=C1OC([H])([H])[H]	2.81701	6.731685000000001	2.629252	6.6754333500000005	1.72411184	2.8829183
[H]C1=C([H])C(=C(F)C(F)=C1OC([H])([H])[H])C1C([H])=C(C(=C([H])C=1F)C1=C([H])C([H])=C(F)C(F)=C1OC([H])([H])[H])[N+](=O)[O-]	3.03945	6.77127	2.640476	6.7114557	1.73443792	3.0675435
[H]C1=NN2C(=N1)C(=NC(C1C([H])=C(C(=C([H])C=1F)N([H])[H])C([H])([H])[H])=C2[H])C1C(F)=C([H])C([H])=C(C=1N([H])[H])C([H])([H])[H]	2.78962	6.022249	1.9203	6.02984659	1.0718759999999996	2.8601846
[H]C1=NN2C(=N1)C(=NC(C1C(F)=C([H])C([H])=C(C=1N([H])[H])C([H])([H])[H])=C2[H])C1C([H])=C(C(=C([H])C=1F)N([H])[H])C([H])([H])[H]	2.7531	5.967194	1.807876	5.97974654	0.9684459199999997	2.829873
[H]C1=NC(F)=C(C2N=C(C(=NC=2[H])C2=NC(F)=C([H])N2C([H])([H])[H])N([H])[H])N1C([H])([H])[H]	2.50327	5.9757479999999985	2.158396	5.987530679999999	1.2909243200000002	2.6225141
[H]C1=NC(F)=C(C2=NC([H])=C(N=C2N([H])[H])C2=NC(F)=C([H])N2C([H])([H])[H])N1C([H])([H])[H]	2.33893	5.877832	2.255732	5.89842712	1.3804734400000003	2.4861119
[H]C1=NC2C(=C([H])C(=C([H])C=2C2C([H])=C([H])C([H])=C3SC(=NC=23)N([H])[H])[N+](=O)[O-])C([H])=C1C1C([H])=C2SC(=NC2=C([H])C=1[H])N([H])[H]	2.80041	6.1520150000000005	2.6669720000000003	6.147933650000001	1.7588142400000004	2.8691402999999998
[H]C1=NC2C(=C([H])C(=C([H])C=2C2C([H])=C3SC(=NC3=C([H])C=2[H])N([H])[H])[N+](=O)[O-])C([H])=C1C1C([H])=C([H])C([H])=C2SC(=NC=12)N([H])[H]	2.75393	6.127445	2.669364	6.12557495	1.7610148799999998	2.8305619
[H]C1=NC(C2C([H])=C([H])C(C3=NC([H])=C([H])N4C3=NC([H])=C4Cl)=C3C([H])=C([H])N([H])C=23)=C([H])N2C1=NC([H])=C2Cl	2.5356400000000003	5.898671	2.050664	5.91739061	1.1918108799999994	2.6493812000000005
[H]C1=NC(C2C([H])=C([H])C(C3=NC([H])=C([H])N4C3=NC([H])=C4Cl)=C3C=2C([H])=C([H])N3[H])=C([H])N2C1=NC([H])=C2Cl	2.61864	5.853808	1.991968	5.8765652799999994	1.1378105600000001	2.7182712
[H]C(=O)C1SC(=NC=1C1=C2N=C([H])N([H])C2=C([H])C([H])=C1N([H])[H])C1C([H])=C2C(N=C([H])N2[H])=C([H])C=1N([H])[H]	2.26755	6.0316220000000005	2.5237279999999997	6.03837602	1.6270297599999997	2.4268665
[H]C(=O)C1SC(=NC=1C1C([H])=C2C(N=C([H])N2[H])=C([H])C=1N([H])[H])C1=C2N=C([H])N([H])C2=C([H])C([H])=C1N([H])[H]	2.19866	5.945354	2.53946	5.95987214	1.6415031999999998	2.3696878
[H]C1=C([H])C([H])=C(C([H])=C1[H])C1C([H])=C([H])C(=C([H])C=1C1C([H])=C([H])C([H])=C(F)C=1Cl)C1C([H])=C([H])C([H])=C(Cl)C=1F	3.8395699999999993	6.425197	1.4436479999999996	6.39652927	0.6333561599999991	3.7316430999999994
[H]C1=C([H])C([H])=C(C([H])=C1[H])C1C([H])=C([H])C(=C([H])C=1C1C([H])=C([H])C([H])=C(Cl)C=1F)C1C([H])=C([H])C([H])=C(F)C=1Cl	3.7499300000000004	6.459322	1.476032	6.42758302	0.6631494399999998	3.6572419000000007
[H]C1=NC(=C(C2=C3OC(F)(F)OC3=C([H])C(C3=NC(=C([H])N3[H])[N+](=O)[O-])=C2N([H])[H])N1[H])[N+](=O)[O-]	2.21028	6.471971	2.523084	6.4390936100000005	1.6264372799999998	2.3793324
[H]C1=NC(=C(C2C([H])=C3OC(F)(F)OC3=C(C3=NC(=C([H])N3[H])[N+](=O)[O-])C=2N([H])[H])N1[H])[N+](=O)[O-]	2.4816900000000004	6.529574	2.581136	6.49151234	1.6798451199999995	2.6046027000000005
[H]C1N=C2C([H])=C([H])C(=C([H])C2=C([H])C=1[H])C1=C([H])C(=C(F)C(F)=C1OC([H])([H])[H])C1C([H])=C([H])N=C2C([H])=C([H])C([H])=C([H])C=12	3.16644	6.441668	1.994728	6.41151788	1.1403497600000003	3.1729452
[H]C1N=C2C([H])=C([H])C(=C([H])C2=C(C=1[H])C1=C([H])C([H])=C(F)C(F)=C1OC([H])([H])[H])C1C([H])=C([H])C(OC([H])([H])[H])=C(F)C=1F	3.1764	6.477431	1.970164	6.44406221	1.11775088	3.1812120000000004
[H]C1N=C(C([H])=C(C=1F)C1=C([H])C(Cl)=C([H])C([H])=C1Cl)C1C([H])=C(Cl)C([H])=C([H])C=1Cl	3.63041	6.998497	2.165112	6.918232270000001	1.2971030399999997	3.5580403
[H]C1N=C(C([H])=C(C=1F)C1C([H])=C(Cl)C([H])=C([H])C=1Cl)C1=C([H])C(Cl)=C([H])C([H])=C1Cl	3.6063400000000003	6.9973139999999985	2.049468	6.917155739999998	1.1907105600000003	3.5380622000000006
[H]C1=C([H])C([H])=C(C2=NC3C(S2)=C([H])C([H])=C([H])C=3C2=C([H])C(C3C([H])=C([H])C([H])=C4N=C(SC=34)C3C([H])=C([H])C([H])=C([H])C=3[H])=C(C(=C2[H])C(F)(F)F)N([H])[H])C([H])=C1[H]	3.027	5.944262	1.9681400000000002	5.9588784200000005	1.1158887999999996	3.0572100000000004
[H]C1=C([H])C([H])=C(C2=NC3C(S2)=C([H])C([H])=C([H])C=3C2C([H])=C(C([H])=C(C=2N([H])[H])C(F)(F)F)C2C([H])=C([H])C([H])=C3N=C(SC=23)C2C([H])=C([H])C([H])=C([H])C=2[H])C([H])=C1[H]	3.1506699999999994	5.910046	1.9597680000000004	5.92774186	1.10818656	3.1598561
[H]SC1=C([H])C([H])=C([H])C(C2=NC3=C(C(=C2[H])C2C([H])=C([H])C([H])=C([H])C=2S[H])N([H])C([H])([H])C([H])([H])C3([H])[H])=C1[H]	2.93985	5.690918	1.3261639999999997	5.72833538	0.525270879999999	2.9848755000000002
[H]SC1=C([H])C([H])=C([H])C(=C1[H])C1=C([H])C(=NC2=C1N([H])C([H])([H])C([H])([H])C2([H])[H])C1C([H])=C([H])C([H])=C([H])C=1S[H]	3.08593	5.775639	1.3264399999999998	5.80543149	0.5255247999999995	3.1061218999999998
[H]C1=NC2=C(C([H])=C([H])C(C3C([H])=C(OC(F)(F)F)C(=C([H])C=3[H])N([H])[H])=C2C([H])=C1[H])C1C([H])=C([H])C([H])=C(OC(F)(F)F)C=1N([H])[H]	2.95811	5.984575	1.9363080000000001	5.99556325	1.0866033599999998	3.0000313
[H]C1=NC2=C(C([H])=C([H])C(=C2C([H])=C1[H])C1C([H])=C([H])C([H])=C(OC(F)(F)F)C=1N([H])[H])C1C([H])=C(OC(F)(F)F)C(=C([H])C=1[H])N([H])[H]	2.88092	5.985303	1.9491880000000001	5.99622573	1.0984529600000004	2.9359636
[H]C1=NC(=C([H])C2C1=NN([H])C=2C1C([H])=C([H])C([H])=C2C=1C(=O)C(=O)N2[H])C1=C([H])C([H])=C2C(=O)C(=O)N([H])C2=C1[H]	1.84342	6.518836	3.134608	6.481740760000001	2.1890393599999998	2.0748386
[H]C1=NC(=C([H])C2C1=NN([H])C=2C1=C([H])C([H])=C2C(=O)C(=O)N([H])C2=C1[H])C1C([H])=C([H])C([H])=C2C=1C(=O)C(=O)N2[H]	1.90318	6.5324860000000005	3.249516	6.49416226	2.29475472	2.1244394
[H]C1=NC(C2C([H])=C(C3=NC([H])=C([H])N3C([H])([H])[H])C(=NC=2C([H])([H])[H])C([H])([H])[H])=C([H])N1C([H])([H])[H]	3.3556800000000004	5.985576	1.0712320000000002	5.99647416	0.29073344000000034	3.3300144000000005
[H]C1=NC(C2C(=NC(=C(C3=NC([H])=C([H])N3C([H])([H])[H])C=2[H])C([H])([H])[H])C([H])([H])[H])=C([H])N1C([H])([H])[H]	3.41046	5.977022	1.0433560000000002	5.98869002	0.2650875199999998	3.3754818
[H]C1=NC(=C(S1)C1=NN=C(C2=NC(=C([H])S2)C([H])([H])[H])C(=C1[H])C([H])([H])[H])C([H])([H])[H]	2.52983	6.3746920000000005	2.616924	6.35056972	1.7127700799999999	2.6445589000000003
[H]C1=NC(=C(S1)C1=NN=C(C2=NC(=C([H])S2)C([H])([H])[H])C([H])=C1C([H])([H])[H])C([H])([H])[H]	2.51323	6.404904	2.642224	6.3780626400000004	1.73604608	2.6307809000000004
[H]C1N=C2C(=C([H])C=1C1SC([H])=C(C(=O)C([H])([H])[H])C=1[H])C(C1SC([H])=C([H])C=1C(=O)C([H])([H])[H])=C([H])N2[H]	2.63441	5.746518999999998	1.942288	5.778932289999998	1.0921049599999995	2.7313603000000004
[H]C1N=C2C(=C([H])C=1C1SC([H])=C([H])C=1C(=O)C([H])([H])[H])C(C1SC([H])=C(C(=O)C([H])([H])[H])C=1[H])=C([H])N2[H]	2.5920799999999997	5.7856489999999985	1.9582040000000005	5.814540589999998	1.1067476799999998	2.6962264
[H]C1=NC(C2=NC3C([H])=NC([H])=C([H])C=3C(C3=NC([H])=C(F)C([H])=C3[H])=C2[H])=C(F)C([H])=C1[H]	3.01538	6.781097999999999	2.524464	6.720399179999999	1.6277068799999999	3.0475654
[H]C1=NC(=C(F)C([H])=C1[H])C1=C([H])C(=NC2C([H])=NC([H])=C([H])C=21)C1=NC([H])=C(F)C([H])=C1[H]	3.04028	6.8467090000000015	2.489504	6.780105190000001	1.59554368	3.0682324000000003
[H]C1=NC(C#N)=C(C2=C(C([H])=C(C(C3=NC(C#N)=C([H])N3C([H])([H])[H])=C2C([H])([H])[H])C([H])([H])[H])N([H])[H])N1C([H])([H])[H]	3.1689300000000005	6.016425	1.0772119999999994	6.02454675	0.2962350399999991	3.1750119000000003
[H]C1=NC(C#N)=C(C2C(=C([H])C(=C(C3=NC(C#N)=C([H])N3C([H])([H])[H])C=2C([H])([H])[H])N([H])[H])C([H])([H])[H])N1C([H])([H])[H]	3.3307800000000003	6.04782	1.1595519999999997	6.0531162	0.3719878399999992	3.3093474
[H]C1=NC([H])=C(C([H])=C1Cl)C1C([H])=C(C(C2=NC([H])=C([H])C([H])=C2Cl)=C([H])C=1F)N([H])[H]	3.0685	6.108426000000001	1.7558040000000001	6.108267660000001	0.9205396800000001	3.0916550000000003
[H]C1N=C(C(Cl)=C([H])C=1C1C([H])=C([H])C([H])=C([H])C=1Cl)C1C([H])=C([H])C(Cl)=C([H])C=1[H]	3.73831	6.805667999999999	1.8264599999999998	6.742757879999999	0.9855431999999995	3.6475973
[H]C1=C([H])C(F)=C(C(F)=C1[H])C1N=C(C([H])=C(C=1[H])C1C([H])=C(F)C([H])=C(F)C=1[H])N([H])[H]	3.02783	6.209345	1.7564479999999998	6.20010395	0.92113216	3.0578989
[H]C1=C([H])C(F)=C(C(F)=C1[H])C1C([H])=C(N=C(C=1[H])N([H])[H])C1C([H])=C(F)C([H])=C(F)C=1[H]	3.17308	6.2168980000000005	1.6511079999999998	6.206977180000001	0.8242193599999998	3.1784564
[H]C1N=C2C(=NC=1[H])N([H])C([H])=C2C1C([H])=C(SC=1C([H])([H])[H])C1N=C2C(=NC=1[H])N([H])C([H])=C2[H]	2.66263	5.670261	1.772088	5.70953751	0.9355209599999998	2.7547829000000004
[H]C1N=C2C(=NC=1[H])N([H])C([H])=C2C1SC(=C(C=1[H])C1N=C2C(=NC=1[H])N([H])C([H])=C2[H])C([H])([H])[H]	2.65516	5.759441000000002	1.8197439999999998	5.7906913100000015	0.9793644800000001	2.7485828000000003
[H]C1=NC2=C(C([H])=NN2C([H])=C1[H])C1C([H])=C([H])C(C2C([H])=NC3=C([H])C([H])=NN3C=2[H])=C(C=1[N+](=O)[O-])C([H])([H])[H]	2.7946	6.327918	2.2526040000000003	6.308005380000001	1.3775956799999998	2.864318
[H]C1=NC2=C(C([H])=NN2C([H])=C1[H])C1C([H])=C([H])C(C2C([H])=NC3=C([H])C([H])=NN3C=2[H])=C(C=1C([H])([H])[H])[N+](=O)[O-]	2.64354	6.302256	2.328136	6.28465296	1.4470851200000001	2.7389381999999998
[H]C1=NC([H])=C(C2C([H])=C([H])C(=NC=2C([H])([H])[H])C2=NC([H])=C([H])C(=C2[H])C(F)(F)F)C(=C1[H])C(F)(F)F	3.27185	6.8276900000000005	2.217552	6.762797900000001	1.3453478399999996	3.2604355000000003
[H]C1=NC([H])=C(C2=NC(=C(C3=NC([H])=C([H])C(=C3[H])C(F)(F)F)C([H])=C2[H])C([H])([H])[H])C(=C1[H])C(F)(F)F	3.3988400000000003	6.863543999999999	2.0068719999999995	6.79542504	1.1515222399999994	3.3658372000000005
[H]C(=O)C1C(F)=C(C([H])=C([H])C=1C1C(F)=C([H])C([H])=C([H])C=1F)C1C([H])=C(F)C([H])=C(F)C=1[H]	2.7365	6.88502	2.264104	6.8149682	1.3881756799999998	2.816095
[H]C(=O)C1C(F)=C(C([H])=C([H])C=1C1C([H])=C(F)C([H])=C(F)C=1[H])C1C(F)=C([H])C([H])=C([H])C=1F	2.8029	6.882016999999999	2.2699	6.812235469999999	1.3935079999999997	2.871207
[H]C1=C([H])C(C2=NC3=C(C(=C2[H])C2=C([H])C([H])=C(Cl)C([H])=C2F)N([H])C([H])([H])C([H])([H])C3([H])[H])=C(Cl)C([H])=C1F	2.95894	6.013148999999999	1.55598	6.02156559	0.7367016	3.0007202
[H]C1=C([H])C(=C(Cl)C([H])=C1F)C1=C([H])C(=NC2=C1N([H])C([H])([H])C([H])([H])C2([H])[H])C1=C([H])C([H])=C(Cl)C([H])=C1F	2.92906	6.045363	1.547332	6.05088033	0.72874544	2.9759198000000007
[H]C1=NC(C2C([H])=C([H])C(C3=NC([H])=C(C([H])=C3[H])C([H])([H])[H])=C(F)C=2Cl)=C(C([H])=C1[H])C([H])([H])[H]	3.67938	6.716488000000001	1.6633440000000004	6.661604080000001	0.8354764800000005	3.5986854000000004
[H]C1=NC(C2C([H])=C([H])C(C3=NC([H])=C(C([H])=C3[H])C([H])([H])[H])=C(Cl)C=2F)=C(C([H])=C1[H])C([H])([H])[H]	3.5731399999999995	6.724769	1.7176239999999998	6.66913979	0.8854140799999994	3.5105062
[H]C1=NC(F)=C(C2C([H])=C([H])C(=C(C3=NC(F)=C([H])N3C([H])([H])[H])C=2F)[N+](=O)[O-])N1C([H])([H])[H]	2.19119	6.710482000000001	2.84306	6.65613862	1.9208151999999998	2.3634877000000003
[H]C1=NC(F)=C(C2C(F)=C(C3=NC(F)=C([H])N3C([H])([H])[H])C([H])=C([H])C=2[N+](=O)[O-])N1C([H])([H])[H]	2.58046	6.7022010000000005	2.795588	6.648602910000001	1.8771409600000002	2.6865818
[H]C1=C([H])C(=C([H])C(=C1Cl)C1C([H])=C(C([H])=C([H])C=1[N+](=O)[O-])C1=C([H])C(Cl)=C([H])C([H])=C1C([H])([H])[H])C([H])([H])[H]	3.06518	6.8965770000000015	2.576996	6.825485070000001	1.6760363199999997	3.0888994
[H]C1=C([H])C(=C([H])C(=C1Cl)C1C([H])=C([H])C(=C(C=1[H])C1=C([H])C(Cl)=C([H])C([H])=C1C([H])([H])[H])[N+](=O)[O-])C([H])([H])[H]	3.09506	6.898670000000001	2.562276	6.827389700000001	1.6624939200000002	3.1136998
[H]C1=NN(C(=N1)C1C([H])=C([H])C(=NC=1C([H])([H])[H])C1=NN(C([H])=N1)C([H])([H])OC([H])([H])[H])C([H])([H])OC([H])([H])[H]	3.2527599999999994	6.722766999999998	1.90696	6.667317969999999	1.0596031999999997	3.2445907999999997
[H]C1=NN(C(=N1)C1=NC(=C(C2=NN(C([H])=N2)C([H])([H])OC([H])([H])[H])C([H])=C1[H])C([H])([H])[H])C([H])([H])OC([H])([H])[H]	3.49844	6.8101270000000005	1.7110000000000003	6.746815570000001	0.8793199999999999	3.4485052
[H]C(=O)C1=C([H])C(=C([H])C([H])=C1F)C1C([H])=C([H])N=C2C(=C([H])C([H])=C([H])C=12)C1C([H])=C([H])C([H])=C(C([H])=O)C=1F	3.02368	6.6177529999999996	2.23402	6.571755229999999	1.3604984	3.0544544
[H]C(=O)C1=C([H])C(=C([H])C([H])=C1F)C1C2=NC([H])=C([H])C(C3C([H])=C([H])C([H])=C(C([H])=O)C=3F)=C2C([H])=C([H])C=1[H]	3.08344	6.63477	2.222612	6.5872407	1.3500030399999998	3.1040552000000003
[H]C1=NC2=NC(=C([H])C([H])=C2C([H])=C1[H])C1C([H])=C(C([H])=C(C=1Cl)C([H])([H])C([H])([H])[H])C1=C([H])N=C2N=C([H])C([H])=C([H])C2=C1[H]	2.81701	6.8172250000000005	2.354356	6.753274750000001	1.47120752	2.8829183
[H]C1=NC2=NC(=C([H])C([H])=C2C([H])=C1[H])C1=C([H])C(=C(Cl)C(=C1[H])C([H])([H])C([H])([H])[H])C1=C([H])N=C2N=C([H])C([H])=C([H])C2=C1[H]	2.88175	6.7401480000000005	2.259964	6.68313468	1.38436688	2.9366525
[H]C1N=C(C([H])=C(C2C([H])=C(C(=C([H])C=2N([H])[H])C([H])([H])[H])C([H])([H])[H])C=1N([H])[H])C1C(=C([H])C([H])=C(C=1C([H])([H])[H])C([H])([H])[H])N([H])[H]	2.9257400000000002	5.967830999999999	1.3580879999999995	5.980326209999999	0.5546409599999995	2.9731642000000003
[H]C1N=C(C([H])=C(C2C(=C([H])C([H])=C(C=2C([H])([H])[H])C([H])([H])[H])N([H])[H])C=1N([H])[H])C1C([H])=C(C(=C([H])C=1N([H])[H])C([H])([H])[H])C([H])([H])[H]	3.1448599999999995	5.8549	1.1962599999999997	5.877559	0.40575919999999943	3.1550338
[H]C(=O)C1=C([H])C([H])=C([H])C(=C1F)C1C([H])=C(C#N)C(F)=C(C=1[H])C1C([H])=C([H])C([H])=C(F)C=1C([H])=O	2.7116	6.954362	2.3121280000000004	6.878069419999999	1.4323577600000004	2.7954280000000002
[H]C(=O)C1=C([H])C([H])=C([H])C(=C1F)C1C([H])=C(C([H])=C(C#N)C=1F)C1C([H])=C([H])C([H])=C(F)C=1C([H])=O	2.82614	7.02425	2.2937279999999998	6.9416675	1.4154297599999994	2.8904962000000003
[H]SC1=C([H])C([H])=C([H])C(C2=NC(C3C([H])=C([H])C([H])=C([H])C=3S[H])=C(N2[H])C([H])([H])[H])=C1[H]	2.93902	5.4491309999999995	1.0389400000000002	5.508309209999999	0.2610248000000004	2.9841866
[H]SC1=C([H])C([H])=C([H])C(=C1[H])C1N=C(C2C([H])=C([H])C([H])=C([H])C=2S[H])N([H])C=1C([H])([H])[H]	2.96392	5.4697879999999985	1.0233919999999994	5.527107079999999	0.2467206399999995	3.0048536
[H]C1=C([H])C(=C(C#N)C([H])=C1C1C([H])=C([H])C(=C(C=1F)C([H])([H])[H])N([H])[H])C1=C([H])C([H])=C(F)C(=C1N([H])[H])C([H])([H])[H]	3.19217	5.9613700000000005	1.504736	5.9744467000000006	0.6895571199999999	3.1943011
[H]C1=C([H])C(=C(C#N)C([H])=C1C1=C([H])C([H])=C(F)C(=C1N([H])[H])C([H])([H])[H])C1C([H])=C([H])C(=C(C=1F)C([H])([H])[H])N([H])[H]	3.14818	6.004777	1.470236	6.0139470699999995	0.6578171199999998	3.1577894000000004
[H]C1N=C(C([H])=C(C=1[H])C1C([H])=C([H])C(C2N=C(C([H])=C([H])C=2[H])N([H])[H])=C2C([H])=C([H])N([H])C=12)N([H])[H]	2.75808	5.612112000000001	1.4089639999999999	5.656621920000001	0.6014468800000001	2.8340064000000003
[H]C1N=C(C([H])=C(C=1[H])C1C([H])=C([H])C(C2N=C(C([H])=C([H])C=2[H])N([H])[H])=C2C=1C([H])=C([H])N2[H])N([H])[H]	2.81535	5.664892	1.3411600000000004	5.70465172	0.5390671999999999	2.8815405000000003
[H]C1N=C2C(=NC=1[H])N([H])C([H])=C2C1C([H])=C([H])N=C2C([H])=C(C([H])=C([H])C=12)C1N=C2C(=NC=1[H])N([H])C([H])=C2[H]	2.97886	6.242378	2.187192	6.23016398	1.3174166400000002	3.0172538
[H]C1N=C2C(=NC=1[H])N([H])C([H])=C2C1C([H])=C([H])C2C(=NC([H])=C([H])C=2C2N=C3C(=NC=2[H])N([H])C([H])=C3[H])C=1[H]	3.01621	6.287332	2.147816	6.27107212	1.2811907199999997	3.0482543
[H]C1=NN2C(=N1)C(=NC([H])=C2[H])C1C2=NC([H])=C([H])N2C([H])=C(C=1[H])C1=C([H])N=C([H])C2=NC([H])=NN21	2.60785	6.217626	2.362452	6.20763966	1.47865584	2.7093155
[H]C1=NN2C(=N1)C(=NC([H])=C2[H])C1C([H])=C(C2=NC([H])=C([H])N2C=1[H])C1=C([H])N=C([H])C2=NC([H])=NN21	2.5895900000000003	6.1998809999999995	2.342948	6.191491709999999	1.46071216	2.6941597
[H]C1=C([H])C(C(=O)Cl)=C([H])C(C2=NC3C([H])=C(C([H])=C([H])C=3S2)C2C([H])=C([H])C([H])=C(C(=O)Cl)C=2[H])=C1[H]	3.13905	6.638501	2.416732	6.59063591	1.5285934399999999	3.1502115
[H]C1=C([H])C(C(=O)Cl)=C([H])C(=C1[H])C1C([H])=C([H])C2SC(=NC=2C=1[H])C1C([H])=C([H])C([H])=C(C(=O)Cl)C=1[H]	3.13407	6.639502	2.4102919999999997	6.59154682	1.5226686399999996	3.1460781
[H]C1N=C(Cl)C(C2=C([H])C(=C(C([H])=C2C([H])([H])[H])C2=C([H])N=C(Cl)C([H])=C2N([H])[H])N([H])[H])=C(C=1[H])N([H])[H]	3.4569400000000003	5.99959	0.944732	6.009226900000001	0.17435343999999997	3.4140602000000007
[H]C1N=C(Cl)C(C2C([H])=C(C(=C([H])C=2N([H])[H])C2=C([H])N=C(Cl)C([H])=C2N([H])[H])C([H])([H])[H])=C(C=1[H])N([H])[H]	3.34572	6.024706	1.0924839999999998	6.03208246	0.31028527999999955	3.3217476
[H]C1=NC(=C(C2=NC3C([H])=C([H])C(=C([H])C=3S2)C2C([H])=NC(=C([H])C=2[H])[N+](=O)[O-])C([H])=C1[H])[N+](=O)[O-]	2.48335	6.906314	3.010776	6.83434574	2.0751139199999997	2.6059805000000003
[H]C1=NC(=C(C([H])=C1[H])C1C([H])=C([H])C2N=C(SC=2C=1[H])C1C([H])=NC(=C([H])C=1[H])[N+](=O)[O-])[N+](=O)[O-]	2.8883900000000002	6.872553	2.766792	6.8036232299999995	1.8506486400000002	2.9421637
[H]C1=NC2=C([H])C([H])=C([H])C([H])=C2C(=N1)C1C([H])=C([H])N=C2C([H])=C([H])C(C3N=C([H])C4=C([H])C([H])=C([H])C([H])=C4N=3)=C([H])C=12	2.73235	6.66662	2.6367960000000004	6.6162241999999996	1.7310523200000003	2.8126505
[H]C1=NC2=C([H])C([H])=C([H])C([H])=C2C(=N1)C1C([H])=C([H])C2=NC([H])=C([H])C(C3N=C([H])C4=C([H])C([H])=C([H])C([H])=C4N=3)=C2C=1[H]	2.76804	6.660158999999999	2.625572	6.61034469	1.7207262399999999	2.8422732
[H]C1N=C(C(C2N=C(C3=NC([H])=C(Cl)N3C=2[H])C2=C([H])N=C(C([H])=C2OC([H])([H])[H])N([H])[H])=C(OC([H])([H])[H])C=1[H])N([H])[H]	2.91578	6.254208	2.002916	6.2409292800000005	1.1478827200000001	2.9648974
[H]C1N=C(C(C2=NC(C3=C([H])N=C(C([H])=C3OC([H])([H])[H])N([H])[H])=C([H])N3C2=NC([H])=C3Cl)=C(OC([H])([H])[H])C=1[H])N([H])[H]	2.89752	6.2713160000000014	2.104852	6.2564975600000015	1.2416638400000002	2.9497416000000003
[H]C1=C([H])C(=C(OC([H])([H])[H])C(C#N)=C1[H])C1C([H])=C([H])C(=C([H])C=1C([H])([H])C#N)C1C([H])=C(C#N)C(OC([H])([H])[H])=C([H])C=1[H]	3.3340999999999994	6.4492210000000005	1.51274	6.41839111	0.6969208	3.3121029999999996
[H]C1=C([H])C(=C(OC([H])([H])[H])C(C#N)=C1[H])C1C([H])=C([H])C(C2C([H])=C(C#N)C(OC([H])([H])[H])=C([H])C=2[H])=C(C=1[H])C([H])([H])C#N	3.41129	6.464418	1.5301280000000002	6.43222038	0.7129177599999998	3.3761707000000003
[H]C1=C([H])C(=C(C2=C([H])C3=NC(=NN3C([H])=C2[H])C2C([H])=C([H])C(=C([H])C=2C([H])([H])[H])N([H])[H])C(=C1[H])C([H])([H])[H])N([H])[H]	3.00625	5.737965	1.155412	5.77114815	0.36817904000000024	3.0399875000000005
[H]C1=C([H])C(=C(C2=NN3C(=N2)C([H])=C(C([H])=C3[H])C2C([H])=C([H])C(=C([H])C=2C([H])([H])[H])N([H])[H])C(=C1[H])C([H])([H])[H])N([H])[H]	3.23118	5.785558	1.1184279999999998	5.81445778	0.3341537599999995	3.2266794
[H]C(=O)C1C([H])=C(C([H])=C([H])C=1C1=C([H])C([H])=C(C(=C1[H])C([H])(C([H])([H])[H])C([H])([H])[H])N([H])[H])C1C([H])=C([H])C([H])=C(C=1N([H])[H])C([H])(C([H])([H])[H])C([H])([H])[H]	2.81701	5.961824999999998	1.941644	5.974860749999999	1.0915124800000005	2.8829183
[H]C(=O)C1C([H])=C(C([H])=C([H])C=1C1C([H])=C([H])C([H])=C(C=1N([H])[H])C([H])(C([H])([H])[H])C([H])([H])[H])C1=C([H])C([H])=C(C(=C1[H])C([H])(C([H])([H])[H])C([H])([H])[H])N([H])[H]	2.7356700000000003	5.881563	1.906592	5.90182233	1.0592646399999994	2.8154061000000006
[H]SC1C([H])=C(C([H])=C([H])C=1C1=C([H])C(C([H])=O)=C([H])C([H])=C1C([H])=O)C1C([H])=C(C([H])=O)C([H])=C([H])C=1C([H])=O	2.69998	6.294339	2.7319240000000002	6.277448489999999	1.8185700800000002	2.7857834
[H]SC1C([H])=C(C([H])=C([H])C=1C1C([H])=C(C([H])=O)C([H])=C([H])C=1C([H])=O)C1=C([H])C(C([H])=O)=C([H])C([H])=C1C([H])=O	2.63109	6.2714979999999985	2.7361560000000003	6.2566631799999985	1.8224635200000003	2.7286047
[H]C1=C([H])C(C(=O)Cl)=C([H])C(C2=NN(C(=N2)C2C([H])=C([H])C([H])=C(C(=O)Cl)C=2[H])C2([H])OC([H])([H])C([H])([H])C([H])([H])C2([H])[H])=C1[H]	3.1764	7.092136	2.414248	7.00344376	1.5263081600000001	3.1812120000000004
[H]C1=C([H])C(C(=O)Cl)=C([H])C(C2=NC(=NN2C2([H])OC([H])([H])C([H])([H])C([H])([H])C2([H])[H])C2C([H])=C([H])C([H])=C(C(=O)Cl)C=2[H])=C1[H]	3.2179	7.029255	2.391432	6.94622205	1.5053174399999998	3.215657
[H]C1=C([H])C(C2C([H])=C3C(=NC=2C([H])([H])[H])N([H])C([H])=C3C2=C([H])C([H])=C(C(=C2[H])[N+](=O)[O-])C([H])([H])[H])=C(C(=C1[H])[N+](=O)[O-])C([H])([H])[H]	3.00044	6.306351	2.388672	6.28837941	1.50277824	3.0351652000000002
[H]C1=C([H])C(C2C3C(=NC(=C(C=3[H])C3=C([H])C([H])=C(C(=C3[H])[N+](=O)[O-])C([H])([H])[H])C([H])([H])[H])N([H])C=2[H])=C(C(=C1[H])[N+](=O)[O-])C([H])([H])[H]	2.65267	6.2308210000000015	2.39594	6.219647110000001	1.5094648	2.7465161
[H]C1C2=NC(=NN2C([H])=C(C=1[H])C1=C([H])C([H])=C(C([H])=C1C([H])([H])[H])N([H])[H])C1C([H])=C([H])C(=C([H])C=1N([H])[H])C([H])([H])[H]	3.17391	5.7083900000000005	1.1495240000000004	5.7442349	0.36276208000000043	3.1791453
[H]C1C2=NC(=NN2C([H])=C(C=1[H])C1C([H])=C([H])C(=C([H])C=1N([H])[H])C([H])([H])[H])C1=C([H])C([H])=C(C([H])=C1C([H])([H])[H])N([H])[H]	3.04775	5.642688	1.1481440000000005	5.68444608	0.3614924799999999	3.0744325000000003
[H]C1=C([H])C(C2C([H])=C(C([H])=C(C=2N([H])[H])C([H])([H])C([H])([H])[H])C2C([H])=C(F)C(=C([H])C=2[H])N([H])[H])=C(C(F)=C1[H])N([H])[H]	3.34406	5.6078350000000015	0.6973440000000002	5.652729850000002	-0.053243519999999656	3.3203698
[H]C1=C([H])C(C2=C([H])C(C3C([H])=C(F)C(=C([H])C=3[H])N([H])[H])=C(C(=C2[H])C([H])([H])C([H])([H])[H])N([H])[H])=C(C(F)=C1[H])N([H])[H]	3.43951	5.545045	0.711328	5.59559095	-0.0403782399999999	3.3995933000000003
[H]C1=NC([H])=C(N=C1C(=O)C([H])([H])[H])C1N=C(C(Cl)=NC=1[H])C1=NC([H])=C([H])N=C1C(=O)C([H])([H])[H]	2.40948	7.016788	3.136172	6.93487708	2.19047824	2.5446684
[H]C1=NC([H])=C(N=C1C(=O)C([H])([H])[H])C1=NC(C2=NC([H])=C([H])N=C2C(=O)C([H])([H])[H])=C([H])N=C1Cl	2.41031	7.038627999999999	3.0450000000000004	6.954751479999999	2.1066000000000003	2.5453573
[H]C1C([H])=C([H])C(=C(F)C=1[H])C1=C(C(F)=C([H])C(C2C([H])=C([H])C([H])=C(F)C=2[H])=C1C(F)(F)F)N([H])[H]	3.30007	6.232004	1.569136	6.22072364	0.7488051200000001	3.2838581
[H]C1C([H])=C([H])C(=C(F)C=1[H])C1C([H])=C(F)C(=C(C2C([H])=C([H])C([H])=C(F)C=2[H])C=1C(F)(F)F)N([H])[H]	3.2809800000000005	6.228364	1.5682159999999996	6.217411240000001	0.7479587199999997	3.2680134000000005
[H]C1=NN([H])C(=N1)C1C([H])=C2SC(Cl)=NC2=C(C2=NN([H])C([H])=N2)C=1[H]	3.19632	6.620847	2.101264	6.574570770000001	1.2383628799999995	3.1977456
[H]C1=NN([H])C(=N1)C1C([H])=C(C2=NN([H])C([H])=N2)C([H])=C2SC(Cl)=NC=12	3.22039	6.5863580000000015	2.037968	6.543185780000002	1.1801305599999994	3.2177237000000005
[H]C(=O)C1SC(=NC=1[H])C1C(Cl)=C(C([H])=C(OC([H])([H])[H])C=1N([H])[H])C1N=C([H])SC=1C([H])=O	2.54809	6.138183000000001	2.703956	6.1353465300000005	1.7928395199999998	2.6597147000000003
[H]C(=O)C1SC(=NC=1[H])C1C([H])=C(OC([H])([H])[H])C(=C(C=1Cl)C1N=C([H])SC=1C([H])=O)N([H])[H]	2.35636	6.082855	2.6457200000000003	6.08499805	1.7392624000000003	2.5005788000000004
[H]C1=C([H])C(C(=O)Cl)=C(C2=NC(C3=C([H])C(C(=O)Cl)=C([H])C([H])=C3C(=O)Cl)=C([H])N3C2=NC(=C3[H])C([H])([H])[H])C([H])=C1C(=O)Cl	2.6535	7.243742	3.497456	7.14140522	2.52285952	2.747205
[H]C1=C([H])C(C(=O)Cl)=C(C([H])=C1C(=O)Cl)C1N=C(C2=NC(=C([H])N2C=1[H])C([H])([H])[H])C1=C([H])C(C(=O)Cl)=C([H])C([H])=C1C(=O)Cl	2.64354	7.043724	3.2321279999999994	6.95938884	2.2787577599999995	2.7389381999999998
[H]C1C(=O)N(C([H])=C(C=1[H])C1C([H])=C(C(=C([H])C=1C([H])([H])[H])C1C(=O)N(C([H])=C([H])C=1[H])C([H])([H])[H])C([H])([H])[H])C([H])([H])[H]	3.11083	5.942351	1.2567960000000005	5.95713941	0.46145232000000025	3.1267889
[H]C1C(=O)N(C([H])=C(C=1[H])C1=C([H])C(=C(C([H])=C1C([H])([H])[H])C1C(=O)N(C([H])=C([H])C=1[H])C([H])([H])[H])C([H])([H])[H])C([H])([H])[H]	3.09755	5.932341	1.2235839999999998	5.94803031	0.43089727999999994	3.1157665000000003
[H]C1N=C(N=C2C([H])=C([H])C(=C([H])C=12)C1C([H])=C([H])C([H])=C2C=1C([H])=C([H])N2[H])C1=C([H])C([H])=C2C([H])=C([H])N([H])C2=C1[H]	2.84689	5.7275	1.9634479999999999	5.761625	1.1115721599999997	2.9077187
[H]C1N=C(N=C2C([H])=C([H])C(=C([H])C=12)C1=C([H])C([H])=C2C([H])=C([H])N([H])C2=C1[H])C1C([H])=C([H])C([H])=C2C=1C([H])=C([H])N2[H]	2.7116	5.754072	1.9491880000000001	5.78580552	1.0984529600000004	2.7954280000000002
[H]C1N=C(C(C2=C([H])C(C3=C([H])N=C(C([H])=C3C([H])([H])[H])C([H])([H])[H])=C3C(=O)C(=O)N([H])C3=C2[H])=C(C=1[H])C([H])([H])[H])C([H])([H])[H]	1.86085	6.798297	2.9575080000000002	6.73605027	2.02610736	2.0893055000000005
[H]C1N=C(C(C2C([H])=C(C([H])=C3C=2C(=O)C(=O)N3[H])C2=C([H])N=C(C([H])=C2C([H])([H])[H])C([H])([H])[H])=C(C=1[H])C([H])([H])[H])C([H])([H])[H]	1.7512900000000002	6.813403	2.960176	6.74979673	2.02856192	1.9983707000000002
[H]C1N=C(C([H])=C(C=1C1=C([H])C(C(=O)Cl)=C([H])C([H])=C1C(=O)Cl)C(F)(F)F)C1C([H])=C(C(=O)Cl)C([H])=C([H])C=1C(=O)Cl	3.16644	7.5722520000000015	3.1950520000000004	7.440349320000001	2.2446478400000003	3.1729452
[H]C1N=C(C([H])=C(C=1C1C([H])=C(C(=O)Cl)C([H])=C([H])C=1C(=O)Cl)C(F)(F)F)C1=C([H])C(C(=O)Cl)=C([H])C([H])=C1C(=O)Cl	3.2428	7.5480459999999985	3.234704	7.418321859999999	2.28112768	3.2363239999999998
[H]C1=C([H])C(C2C([H])=C(C([H])=C([H])C=2N([H])[H])C2=C([H])C([H])=C(C(=C2[H])[N+](=O)[O-])C([H])([H])[H])=C(C(=C1[H])[N+](=O)[O-])C([H])([H])[H]	2.90997	5.9939480000000005	2.352884	6.00409268	1.4698532799999997	2.9600751
[H]C1=C([H])C(C2C([H])=C([H])C(=C(C=2[H])C2=C([H])C([H])=C(C(=C2[H])[N+](=O)[O-])C([H])([H])[H])N([H])[H])=C(C(=C1[H])[N+](=O)[O-])C([H])([H])[H]	2.99297	5.993037999999999	2.3405560000000003	6.00326458	1.45851152	3.0289651
[H]C1=C([H])C(C2N=C(C([H])=C(C3=C([H])C([H])=C(C(=C3[H])C([H])([H])C([H])([H])[H])N([H])[H])C=2N([H])[H])C(F)(F)F)=C(C(=C1[H])C([H])([H])C([H])([H])[H])N([H])[H]	3.0344700000000002	6.017699	1.4814599999999998	6.02570609	0.6681431999999994	3.0634101000000005
[H]C1=C([H])C(C2=C([H])C(=NC(C3=C([H])C([H])=C(C(=C3[H])C([H])([H])C([H])([H])[H])N([H])[H])=C2N([H])[H])C(F)(F)F)=C(C(=C1[H])C([H])([H])C([H])([H])[H])N([H])[H]	2.9846699999999995	5.829511	1.4577239999999998	5.854455010000001	0.6463060799999996	3.0220760999999996
[H]C1=NC([H])=C(C([H])=C1[H])C1=C([H])C([H])=C([H])C2=NC(=NN21)C1=NC([H])=C([H])C([H])=C1[H]	2.92408	6.477157999999998	2.114236	6.443813779999999	1.25029712	2.9717864
[H]C1=NC([H])=C(C2=NN3C(=N2)C([H])=C([H])C([H])=C3C2=NC([H])=C([H])C([H])=C2[H])C([H])=C1[H]	3.04609	6.4882599999999995	1.977248	6.4539165999999994	1.1242681599999997	3.0730547
[H]C1=NC(C2C([H])=C(C3=NC([H])=C(C([H])=C3[H])C([H])([H])[H])C([H])=C3C(=O)C(=O)N(C=23)C([H])([H])C([H])([H])[H])=C(C([H])=C1[H])C([H])([H])[H]	1.7670599999999996	6.593547	2.904608	6.5497277700000005	1.97743936	2.0114598
[H]C1=NC(C2=C([H])C(C3=NC([H])=C(C([H])=C3[H])C([H])([H])[H])=C3C(C(=O)C(=O)N3C([H])([H])C([H])([H])[H])=C2[H])=C(C([H])=C1[H])C([H])([H])[H]	1.67244	6.5811709999999985	2.931748	6.538465609999999	2.00240816	1.9329252000000001
[H]C1=C([H])C(C(=O)C([H])([H])[H])=C(C([H])=C1C1C([H])=C(C(=C([H])C=1N([H])[H])C([H])([H])[H])C([H])([H])[H])C1C(=C([H])C([H])=C(C=1C([H])([H])[H])C([H])([H])[H])N([H])[H]	2.89005	5.948994	1.7227759999999999	5.96318454	0.8901539199999995	2.9435415000000003
[H]C1=C([H])C(C(=O)C([H])([H])[H])=C(C([H])=C1C1C([H])=C(C(=C([H])C=1N([H])[H])C([H])([H])[H])C([H])([H])[H])C1C(=C([H])C([H])=C(C=1C([H])([H])[H])C([H])([H])[H])N([H])[H]	2.92906	6.031986	1.6711639999999999	6.03870726	0.84267088	2.9759198000000007
[H]C1=NC2C([H])=C(C([H])=C([H])C=2S1)C1=C(C([H])=C([H])C(C2=NC3C([H])=C([H])C([H])=C([H])C=3S2)=C1C([H])([H])[H])C([H])([H])[H]	3.4461500000000003	6.427017	1.6590200000000002	6.3981854700000005	0.8314984000000001	3.4051045
[H]C1=NC2C([H])=C(C([H])=C([H])C=2S1)C1C([H])=C([H])C(=C(C2=NC3C([H])=C([H])C([H])=C([H])C=3S2)C=1C([H])([H])[H])C([H])([H])[H]	3.1639500000000003	6.402902	1.7579200000000001	6.37624082	0.9224864000000004	3.1708785000000006
[H]C(=O)C1C(=NC([H])=C([H])C=1C1N=C2N=C([H])C([H])=C([H])C2=C([H])C=1[H])C1=C([H])N=C2N=C([H])C([H])=C([H])C2=C1[H]	2.76306	6.9416220000000015	2.7968759999999997	6.866476020000001	1.8783259199999995	2.8381398
[H]C(=O)C1C(=NC([H])=C([H])C=1C1=C([H])N=C2N=C([H])C([H])=C([H])C2=C1[H])C1N=C2N=C([H])C([H])=C([H])C2=C([H])C=1[H]	2.56137	7.0330770000000005	2.94794	6.9497000700000005	2.0173048	2.6707371
[H]C1=C([H])C(=C([H])C(=C1Cl)C1C([H])=C([H])C(=C(C=1F)C1=C([H])C(Cl)=C([H])C([H])=C1C([H])([H])[H])N([H])[H])C([H])([H])[H]	3.5059099999999996	6.010055	0.9733440000000001	6.01875005	0.20067648000000027	3.4547052999999996
[H]C1=C([H])C(=C([H])C(=C1Cl)C1C(F)=C(C([H])=C([H])C=1N([H])[H])C1=C([H])C(Cl)=C([H])C([H])=C1C([H])([H])[H])C([H])([H])[H]	3.47188	6.026981	0.9999320000000004	6.03415271	0.22513744000000013	3.4264604
[H]C1=C([H])C(C2=NC(C#N)=C(C3C([H])=C([H])C([H])=C([H])C=3C([H])(C([H])([H])[H])C([H])([H])[H])N2C([H])([H])[H])=C([H])C(=C1[H])C([H])(C([H])([H])[H])C([H])([H])[H]	3.39718	6.349667	1.4621399999999998	6.32779697	0.6503687999999999	3.3644594000000003
[H]C1=C([H])C(=C([H])C(=C1[H])C([H])(C([H])([H])[H])C([H])([H])[H])C1=C(C#N)N=C(C2C([H])=C([H])C([H])=C([H])C=2C([H])(C([H])([H])[H])C([H])([H])[H])N1C([H])([H])[H]	3.44864	6.331285	1.39084	6.31106935	0.5847727999999996	3.4071712000000005
[H]C1=NC(=C([H])C2C1=NN([H])C=2C1=NC2C([H])=C([H])C([H])=C([H])C=2C([H])=C1[H])C1C([H])=C([H])C2C([H])=C([H])C([H])=NC=2C=1[H]	2.73484	6.117708	2.165572	6.11671428	1.2975262399999998	2.8147172000000005
[H]C1=NC(C2=NC3C([H])=C([H])C([H])=C([H])C=3C([H])=C2[H])=C([H])C2C1=NN([H])C=2C1C([H])=C([H])C2C([H])=C([H])C([H])=NC=2C=1[H]	2.78713	6.086131	2.18112	6.08797921	1.3118303999999998	2.8581179
[H]C1=NC(=C([H])C2=C([H])C([H])=C([H])C([H])=C12)C1C([H])=C(F)C(=C(C2=NC([H])=C([H])C3=C([H])C([H])=C([H])C([H])=C23)C=1[H])N([H])[H]	3.0436	5.884384	1.7082400000000002	5.90438944	0.8767807999999997	3.0709880000000003
[H]C1=NC(=C([H])C2=C([H])C([H])=C([H])C([H])=C12)C1C([H])=C(C2=NC([H])=C([H])C3=C([H])C([H])=C([H])C([H])=C23)C([H])=C(F)C=1N([H])[H]	2.71575	5.790836	1.7046519999999998	5.81926076	0.8734798399999999	2.7988725
[H]C1=NN([H])C(C2C([H])=C(C3=NN([H])C([H])=C3[N+](=O)[O-])C(=C([H])C=2OC([H])([H])[H])N([H])[H])=C1[N+](=O)[O-]	2.61947	6.165573999999999	2.43412	6.16027234	1.5445903999999997	2.7189601000000003
[H]C1=NN([H])C(C2=C([H])C(C3=NN([H])C([H])=C3[N+](=O)[O-])=C(OC([H])([H])[H])C([H])=C2N([H])[H])=C1[N+](=O)[O-]	2.65599	6.130266000000001	2.3688	6.12814206	1.484496	2.7492717000000004
[H]C1=C(Cl)N=C(C(=C1[H])C1C([H])=C([H])C(=C([H])C=1OC([H])([H])[H])C1=C(Cl)N=C(C([H])=C1[H])N([H])[H])N([H])[H]	3.35651	5.984393	1.2239519999999997	5.995397629999999	0.43123583999999937	3.3307033
[H]C1=C(Cl)N=C(C(=C1[H])C1C([H])=C([H])C(=C(OC([H])([H])[H])C=1[H])C1=C(Cl)N=C(C([H])=C1[H])N([H])[H])N([H])[H]	3.34157	6.051824	1.2703200000000001	6.05675984	0.4738943999999998	3.3183031
[H]C1=NN(C(=N1)C1C([H])=C(C2=NN(C([H])=N2)C2([H])OC([H])([H])C([H])([H])C([H])([H])C2([H])[H])C2C([H])=C([H])C([H])=NC=2C=1OC([H])([H])[H])C1([H])OC([H])([H])C([H])([H])C([H])([H])C1([H])[H]	2.84191	6.097505999999999	1.865928	6.09833046	1.02185376	2.9035853
[H]C1=NC2C(OC([H])([H])[H])=C(C3=NN(C(=N3)C3=C([H])C([H])=C(OC([H])([H])[H])C4N=C([H])C([H])=C([H])C=43)C3([H])OC([H])([H])C([H])([H])C([H])([H])C3([H])[H])C([H])=C([H])C=2C([H])=C1[H]	2.84191	6.1945120000000005	1.924164	6.18660592	1.0754308799999999	2.9035853
[H]C1C([H])=C([H])C(C2=C([H])C(=C(Cl)C([H])=C2F)C2C([H])=C([H])C(C(=O)OC([H])([H])[H])=C([H])C=2[H])=C(C(=O)OC([H])([H])[H])C=1[H]	3.5855900000000003	6.942895999999998	2.0134040000000004	6.867635359999999	1.15753168	3.5208397000000002
[H]C1C([H])=C([H])C(C2C([H])=C(C(F)=C([H])C=2Cl)C2C([H])=C([H])C(C(=O)OC([H])([H])[H])=C([H])C=2[H])=C(C(=O)OC([H])([H])[H])C=1[H]	3.72254	6.935434000000001	1.937228	6.860844940000001	1.0874497600000002	3.6345082
[H]C1=NC([H])=C([H])C2C1=C([H])C([H])=C([H])C=2C1N=C2C(=NC=1[H])N([H])C([H])=C2C1C([H])=C([H])C([H])=C2C([H])=C([H])N=C([H])C=12	2.78547	6.098052	2.091328	6.09882732	1.2292217599999997	2.8567401000000006
[H]C1=NC([H])=C([H])C2C1=C([H])C([H])=C([H])C=2C1C2=NC(=C([H])N=C2N([H])C=1[H])C1C([H])=C([H])C([H])=C2C([H])=C([H])N=C([H])C=12	2.83112	6.114523	2.0927999999999995	6.11381593	1.2305759999999992	2.8946296
[H]C1=NC([H])=C(C2N=C(C(=NC=2C([H])([H])[H])N([H])[H])C2=NC([H])=C([H])N2C([H])([H])[H])N1C([H])([H])[H]	2.83195	5.7990260000000005	1.6857920000000002	5.82671366	0.8561286399999997	2.8953185
[H]C1=NC([H])=C(C2=NC(C3=NC([H])=C([H])N3C([H])([H])[H])=C(N=C2N([H])[H])C([H])([H])[H])N1C([H])([H])[H]	2.7531	5.808580999999999	1.710172	5.835408709999999	0.8785582400000003	2.829873
[H]C1=NC([H])=C(C2=NC3C([H])=C([H])N=C(C4=NC([H])=C([H])C([H])=C4F)C=3S2)C([H])=C1F	2.80539	6.8668200000000015	2.83478	6.798406200000001	1.9131975999999997	2.8732737000000004
[H]C1=NC([H])=C(C2=NC([H])=C([H])C3N=C(SC=32)C2=NC([H])=C([H])C([H])=C2F)C([H])=C1F	2.7672099999999995	6.783555000000001	2.810308	6.722635050000001	1.8906833599999997	2.8415843
[H]C1=NC(=C([H])C2C1=NN([H])C=2C1=C([H])C([H])=C(F)C([H])=C1OC([H])([H])[H])C1C([H])=C([H])C(OC([H])([H])[H])=C([H])C=1F	2.81203	5.915597	1.7421879999999996	5.9327932699999995	0.9080129599999998	2.8787849000000003
[H]C1=NC(=C([H])C2C1=NN([H])C=2C1C([H])=C([H])C(OC([H])([H])[H])=C([H])C=1F)C1=C([H])C([H])=C(F)C([H])=C1OC([H])([H])[H]	2.80788	5.933160000000001	1.759944	5.948775600000001	0.9243484799999999	2.8753404
[H]C1=C([H])C(C2C([H])=C([H])C(=C(C=2[H])C2C([H])=C(OC([H])([H])[H])C(=C([H])C=2[H])N([H])[H])C([H])([H])[H])=C(C(OC([H])([H])[H])=C1[H])N([H])[H]	3.3208199999999994	5.638502	0.9184199999999992	5.68063682	0.15014639999999968	3.3010805999999997
[H]C1=C([H])C(C2C([H])=C(C([H])=C([H])C=2C([H])([H])[H])C2C([H])=C(OC([H])([H])[H])C(=C([H])C=2[H])N([H])[H])=C(C(OC([H])([H])[H])=C1[H])N([H])[H]	3.22288	5.624306	0.891832	5.66771846	0.12568543999999982	3.2197904
[H]C1=NC([H])=C(C(=N1)C([H])([H])[H])C1=C([H])N=C(OC([H])([H])[H])C(C2=NC([H])=C([H])C(=N2)C([H])([H])[H])=C1OC([H])([H])[H]	3.18968	6.578167999999999	1.8674	6.535732879999999	1.0232079999999995	3.1922344000000002
[H]C1=NC([H])=C(C(=N1)C([H])([H])[H])C1C(=NC([H])=C(C2=NC([H])=C([H])C(=N2)C([H])([H])[H])C=1OC([H])([H])[H])OC([H])([H])[H]	3.23118	6.646509	1.7137599999999995	6.5979231899999995	0.8818592000000001	3.2266794
[H]C1=NC2=C(C3C([H])=C([H])C([H])=C([H])C=3[N+](=O)[O-])C(=C(C([H])=C2N1[H])C1C([H])=C([H])C(=C([H])C=1[H])[N+](=O)[O-])N([H])[H]	2.23435	5.927791	2.431636	5.94388981	1.54230512	2.3993105000000003
[H]C1=NC2=C(C3C([H])=C([H])C(=C([H])C=3[H])[N+](=O)[O-])C(=C(C([H])=C2N1[H])C1C([H])=C([H])C([H])=C([H])C=1[N+](=O)[O-])N([H])[H]	2.29992	5.989762000000002	2.357668	6.0002834200000015	1.4742545599999999	2.4537336000000005
[H]C1=NC2C(OC([H])([H])[H])=C(C([H])=C([H])C=2C([H])=C1[H])C1=C(C(=NN1C([H])([H])[H])C1=C([H])C([H])=C(OC([H])([H])[H])C2N=C([H])C([H])=C([H])C=21)[N+](=O)[O-]	2.74397	6.4846200000000005	2.582424	6.450604200000001	1.6810300800000002	2.8222951000000003
[H]C1=NC2C(OC([H])([H])[H])=C(C3=NN(C(C4=C([H])C([H])=C(OC([H])([H])[H])C5N=C([H])C([H])=C([H])C=54)=C3[N+](=O)[O-])C([H])([H])[H])C([H])=C([H])C=2C([H])=C1[H]	2.6983199999999994	6.497724000000002	2.608828	6.462528840000001	1.70532176	2.7844055999999995
[H]C1=NC(=C([H])N=C1C1C([H])=C([H])C(=C([H])C=1F)N([H])[H])C1=C([H])C([H])=C(F)C([H])=C1N([H])[H]	2.93404	5.947538	1.8260919999999998	5.96185958	0.9852046400000001	2.9800532000000004
[H]C1=NC(=C([H])N=C1C1=C([H])C([H])=C(F)C([H])=C1N([H])[H])C1C([H])=C([H])C(=C([H])C=1F)N([H])[H]	2.85934	5.987123	1.831244	5.99788193	0.9899444800000001	2.9180522
[H]C1=NC([H])=C(C2=NN([H])C(C3C(=NC(Cl)=C([H])C=3[H])C([H])([H])[H])=C12)C1=C(Cl)N=C(C([H])=C1[H])C([H])([H])[H]	2.82365	6.528755	2.240092	6.4907670500000005	1.3660846400000004	2.8884295000000004
[H]C1=NC([H])=C(C2=NN([H])C(C3=C(Cl)N=C(C([H])=C3[H])C([H])([H])[H])=C12)C1C(=NC(Cl)=C([H])C=1[H])C([H])([H])[H]	2.83195	6.4979059999999995	2.236504	6.46269446	1.3627836799999997	2.8953185
[H]C1=NC([H])=C(F)C(=C1[H])C1C([H])=C(C#N)C(=C(C2=NC([H])=C(F)C([H])=C2[H])C=1[H])N([H])[H]	3.0187	6.189507	1.638688	6.18205137	0.8127929600000003	3.0503210000000003
[H]C1=NC([H])=C(F)C(=C1[H])C1C([H])=C(C2=NC([H])=C(F)C([H])=C2[H])C([H])=C(C#N)C=1N([H])[H]	2.9772	6.287058999999999	1.6589279999999995	6.270823689999999	0.8314137599999993	3.015876
[H]C1C(=NC(=C(C=1[H])C1=C([H])C([H])=C2C(=C1[H])C([H])([H])C([H])([H])C(=O)N2[H])N([H])[H])C1C([H])=C([H])C([H])=C2C=1N([H])C(=O)C([H])([H])C2([H])[H]	3.1954899999999995	5.968832	1.5159599999999998	5.981237119999999	0.6998831999999995	3.1970566999999996
[H]C1C(=NC(=C(C=1[H])C1C([H])=C([H])C([H])=C2C=1N([H])C(=O)C([H])([H])C2([H])[H])N([H])[H])C1=C([H])C([H])=C2C(=C1[H])C([H])([H])C([H])([H])C(=O)N2[H]	2.98799	5.949267	1.4432799999999997	5.9634329699999995	0.6330175999999996	3.0248317
[H]C1=NN(C(=N1)C1=NN2C(=N1)C([H])=C([H])C(C1=NN(C([H])=N1)C([H])([H])OC([H])([H])[H])=C2[H])C([H])([H])OC([H])([H])[H]	3.4419999999999997	6.674264000000001	1.6953599999999998	6.623180240000001	0.8649312	3.4016599999999997
[H]C1=NN(C(=N1)C1C([H])=C([H])C2=NC(=NN2C=1[H])C1=NN(C([H])=N1)C([H])([H])OC([H])([H])[H])C([H])([H])OC([H])([H])[H]	3.42125	6.723859000000001	1.780552	6.668311690000001	0.9433078400000001	3.3844375
[H]C1=NC([H])=C([H])C(=C1[H])C1=C(Cl)C([H])=C(C(C2=NC([H])=C([H])C([H])=C2[H])=C1Cl)N([H])[H]	3.3241400000000003	6.366411	1.5191799999999995	6.34303401	0.7028455999999998	3.3038362
[H]C1=NC([H])=C([H])C(=C1[H])C1=C(Cl)C(C2=NC([H])=C([H])C([H])=C2[H])=C(Cl)C([H])=C1N([H])[H]	2.99048	6.286785999999998	1.56656	6.270575259999998	0.7464351999999996	3.0268984000000003
[H]C1=NN2C(=N1)C(=NC([H])=C2[H])C1=NN=C(C([H])=C1C([H])([H])[H])C1=C([H])N=C([H])C2=NC([H])=NN21	2.8112	6.989033	2.8934759999999997	6.90962003	1.9671979199999994	2.878096
[H]C1=NN2C(=N1)C(=NC([H])=C2[H])C1=NN=C(C2=C([H])N=C([H])C3=NC([H])=NN32)C(=C1[H])C([H])([H])[H]	2.5788	6.940621000000001	3.096152	6.86556511	2.15365984	2.6852040000000006
[H]C1=C([H])C(C2N=C(C3=C([H])C([H])=C(C(=C3[H])N([H])[H])C([H])([H])[H])C(=C([H])C=2N([H])[H])C([H])([H])[H])=C(C(=C1[H])N([H])[H])C([H])([H])[H]	3.1241099999999995	5.709391	1.3521079999999994	5.74514581	0.549139359999999	3.1378112999999996
[H]C1=C([H])C(C2=NC(C3=C([H])C([H])=C(C(=C3[H])N([H])[H])C([H])([H])[H])=C(C([H])=C2C([H])([H])[H])N([H])[H])=C(C(=C1[H])N([H])[H])C([H])([H])[H]	3.27102	5.732414	1.3462199999999998	5.76609674	0.5437224	3.2597466
[H]C1=NC(=C([H])N=C1C1=NC([H])=C(N=C1N([H])[H])C([H])([H])[H])C1N=C([H])C(=NC=1C([H])([H])[H])N([H])[H]	2.43853	6.175948	2.43642	6.16971268	1.5467063999999997	2.5687799
[H]C1=NC(C2=NC([H])=C(N=C2N([H])[H])C([H])([H])[H])=C([H])N=C1C1N=C([H])C(=NC=1C([H])([H])[H])N([H])[H]	2.49082	6.242378	2.36972	6.23016398	1.4853424	2.6121806000000003
[H]C1N=C(C(F)=C([H])C=1C1C([H])=C([H])C([H])=C2C=1N([H])C(=O)C2([H])[H])C1=C([H])C([H])=C2C(=C1[H])C([H])([H])C(=O)N2[H]	3.01621	6.2208109999999985	1.78092	6.210538009999999	0.9436463999999996	3.0482543
[H]C1N=C(C(F)=C([H])C=1C1=C([H])C([H])=C2C(=C1[H])C([H])([H])C(=O)N2[H])C1C([H])=C([H])C([H])=C2C=1N([H])C(=O)C2([H])[H]	3.17308	6.268222	1.7347359999999998	6.253682019999999	0.9011571199999997	3.1784564
[H]C1=NC([H])=C(Cl)C(=C1[H])C1C([H])=C(C(=C(C2=NC([H])=C(Cl)C([H])=C2[H])C=1N([H])[H])[N+](=O)[O-])C([H])([H])[H]	2.29577	6.543315	2.650228	6.5040166500000005	1.7434097599999996	2.4502891
[H]C1=NC([H])=C(Cl)C(=C1[H])C1C(=C(C2=NC([H])=C(Cl)C([H])=C2[H])C([H])=C(C=1[N+](=O)[O-])C([H])([H])[H])N([H])[H]	2.3049	6.578896	2.604504	6.53639536	1.70134368	2.4578670000000002
[H]C1=C([H])C([H])=C2C(=NC(=NC2=C1[H])C1C([H])=C([H])C(=C(C#N)C=1Cl)N([H])[H])C1=C([H])C([H])=C(Cl)C(C#N)=C1N([H])[H]	2.6028700000000002	6.4256519999999995	2.4482880000000002	6.396943319999999	1.55762496	2.7051821000000005
[H]C1=C([H])C([H])=C2C(=NC(=NC2=C1[H])C1=C([H])C([H])=C(Cl)C(C#N)=C1N([H])[H])C1C([H])=C([H])C(=C(C#N)C=1Cl)N([H])[H]	2.59955	6.486167	2.511584	6.45201197	1.6158572800000002	2.7024265
[H]C1=NC([H])=C(C2=NSN=C12)C1SC(=C(C2=NC([H])=C([H])C3=NSN=C32)C=1C([H])([H])[H])C([H])([H])[H]	2.3713	6.121621	3.218144	6.12027511	2.2658924799999998	2.5129790000000005
[H]C1=NC([H])=C(C2=NSN=C12)C1=C(SC(C2=NC([H])=C([H])C3=NSN=C32)=C1C([H])([H])[H])C([H])([H])[H]	2.39869	6.026707999999998	3.275644	6.033904279999998	2.31879248	2.5357127000000004
[H]C1=NN([H])C2=C([H])C(=C([H])C([H])=C12)C1=C([H])N=C(C2C([H])=C([H])C([H])=C3C=2C([H])=NN3[H])N1C([H])([H])[H]	3.0759699999999994	5.7290470000000004	1.368576	5.763032770000001	0.5642899200000002	3.0978550999999994
[H]C1=NN([H])C2=C([H])C(C3=NC([H])=C(C4C([H])=C([H])C([H])=C5C=4C([H])=NN5[H])N3C([H])([H])[H])=C([H])C([H])=C12	3.17225	5.792655999999999	1.341436	5.820916959999999	0.5393211199999994	3.1777675
[H]C1=C([H])C(=C([H])C(OC([H])([H])[H])=C1C1C([H])=C2OC([H])([H])C([H])([H])C([H])(C2=C(C=1[H])C1=C([H])C([H])=C(OC([H])([H])[H])C([H])=C1C([H])([H])[H])N([H])[H])C([H])([H])[H]	3.5689900000000003	6.072844999999999	1.2082199999999998	6.0758889499999995	0.41676239999999964	3.5070617000000004
[H]C1=C([H])C(=C([H])C(OC([H])([H])[H])=C1C1C([H])=C(C([H])=C2OC([H])([H])C([H])([H])C([H])(C=12)N([H])[H])C1=C([H])C([H])=C(OC([H])([H])[H])C([H])=C1C([H])([H])[H])C([H])([H])[H]	3.4511300000000005	6.043634	1.2471359999999994	6.04930694	0.45256511999999915	3.4092379000000004
[H]C1C([H])=C([H])C(=C(N=C=S)C=1[H])C1N=C(C([H])=C(C=1[N+](=O)[O-])N([H])[H])C1C([H])=C([H])C(N=C=S)=C([H])C=1[H]	2.44434	6.6012819999999985	2.713984	6.556766619999999	1.8020652799999999	2.5736022
[H]C1C([H])=C([H])C(C2=NC(C3C([H])=C([H])C(N=C=S)=C([H])C=3[H])=C(C(=C2[H])N([H])[H])[N+](=O)[O-])=C(N=C=S)C=1[H]	2.59291	6.622758	2.722264	6.576309780000001	1.80968288	2.6969153
[H]C1N=C2C(=NC(C3C([H])=C(C([H])=C([H])C=3[N+](=O)[O-])N([H])C(=O)C([H])([H])[H])=C([H])N2C=1Cl)C1=C([H])C(=C([H])C([H])=C1N([H])C(=O)C([H])([H])[H])[N+](=O)[O-]	2.78796	6.866001	3.023196	6.797660909999999	2.08654032	2.8588068
[H]C1N=C2C(=NC(C3=C([H])C(=C([H])C([H])=C3N([H])C(=O)C([H])([H])[H])[N+](=O)[O-])=C([H])N2C=1Cl)C1C([H])=C(C([H])=C([H])C=1[N+](=O)[O-])N([H])C(=O)C([H])([H])[H]	2.69666	6.885111	2.968916	6.81505101	2.0366027200000003	2.7830278
[H]C1N=C(F)C(C2=NC(C3=C([H])N=C(F)C([H])=C3C([H])([H])[H])=C(C([H])=C2[H])N([H])[H])=C(C=1[H])C([H])([H])[H]	3.22371	6.154472	1.3612159999999998	6.15016952	0.55751872	3.2204793
[H]C1N=C(F)C(C2N=C(C([H])=C([H])C=2N([H])[H])C2=C([H])N=C(F)C([H])=C2C([H])([H])[H])=C(C=1[H])C([H])([H])[H]	3.22288	6.172308	1.3455760000000003	6.16640028	0.5431299200000002	3.2197904
[H]C1=C([H])C(C2C([H])=C(Cl)C(=C(C=2F)C2=C([H])C([H])=C(C(=C2[H])C([H])([H])N(C([H])([H])[H])C2([H])C([H])([H])C([H])([H])C([H])([H])C([H])([H])C2([H])[H])N([H])[H])N([H])[H])=C(C(=C1[H])C([H])([H])N(C([H])([H])[H])C1([H])C([H])([H])C([H])([H])C([H])([H])C([H])([H])C1([H])[H])N([H])[H]	3.2760000000000002	5.770725	0.8888879999999997	5.80095975	0.12297695999999991	3.2638800000000003
[H]C1=C([H])C(C2C(F)=C(C([H])=C(Cl)C=2N([H])[H])C2=C([H])C([H])=C(C(=C2[H])C([H])([H])N(C([H])([H])[H])C2([H])C([H])([H])C([H])([H])C([H])([H])C([H])([H])C2([H])[H])N([H])[H])=C(C(=C1[H])C([H])([H])N(C([H])([H])[H])C1([H])C([H])([H])C([H])([H])C([H])([H])C([H])([H])C1([H])[H])N([H])[H]	3.31335	5.771089	0.9301960000000004	5.80129099	0.16098032000000018	3.2948804999999997
[H]C1=NC([H])=C(S1)C1C([H])=C(C2=NC([H])=C([H])S2)C([H])=C(C=1C([H])([H])[H])N([H])[H]	2.76887	5.8483480000000005	1.723236	5.871596680000001	0.8905771199999997	2.8429621000000003
[H]C1=NC([H])=C(S1)C1=C([H])C(C2=NC([H])=C([H])S2)=C(C(=C1[H])N([H])[H])C([H])([H])[H]	2.8925400000000003	5.859723000000002	1.61992	5.881947930000002	0.7955264	2.9456082000000006
[H]C1=NN([H])C2C1=C(C([H])=C([H])C=2C1C([H])=C([H])C([H])=C2SC(=NC=12)C1C([H])=C([H])C([H])=C([H])C=1[H])C1C([H])=C([H])C([H])=C2N=C(SC=12)C1C([H])=C([H])C([H])=C([H])C=1[H]	2.80954	5.832058999999999	2.0209479999999997	5.856773689999999	1.1644721599999999	2.8767182
[H]C1=NN([H])C2C1=C(C([H])=C([H])C=2C1C([H])=C([H])C([H])=C2N=C(SC=12)C1C([H])=C([H])C([H])=C([H])C=1[H])C1C([H])=C([H])C([H])=C2SC(=NC=12)C1C([H])=C([H])C([H])=C([H])C=1[H]	2.76555	5.919328	2.050664	5.93618848	1.1918108799999994	2.8402065000000003
[H]C1=NC(=C([H])N=C1C1=C([H])C([H])=C(F)C(F)=C1OC([H])([H])[H])C1C([H])=C([H])C(OC([H])([H])[H])=C(F)C=1F	3.0253400000000004	6.502001	2.19722	6.46642091	1.3266423999999999	3.0558322
[H]C1=NC(=C([H])N=C1C1C([H])=C([H])C(OC([H])([H])[H])=C(F)C=1F)C1=C([H])C([H])=C(F)C(F)=C1OC([H])([H])[H]	3.04692	6.484255999999999	2.191976	6.4502729599999995	1.32181792	3.0737436000000002
[H]C1N=C(C([H])=C2C([H])=C(C([H])=C([H])C=12)C1=C([H])C(C2N=C(C([H])=C3C([H])=C([H])C([H])=C([H])C=23)N([H])[H])=C(C(=C1[H])[N+](=O)[O-])C([H])([H])[H])N([H])[H]	2.77053	5.902038	2.3734919999999997	5.92045458	1.48881264	2.8443399
[H]C1N=C(C([H])=C2C([H])=C(C([H])=C([H])C=12)C1C([H])=C(C([H])=C(C=1C([H])([H])[H])[N+](=O)[O-])C1N=C(C([H])=C2C([H])=C([H])C([H])=C([H])C=12)N([H])[H])N([H])[H]	2.78879	5.9165980000000005	2.3894079999999995	5.93370418	1.5034553599999994	2.8594957
[H]C1=C([H])C([H])=C(C2=NC3C(S2)=C(C([H])=C([H])C=3C2C([H])=C([H])C([H])=C3C([H])=C([H])N([H])C=23)C2=C([H])C([H])=C3C(=C2[H])C([H])=C([H])N3[H])C([H])=C1[H]	3.1697599999999997	5.698835	1.842008	5.73553985	0.9998473599999995	3.1757008
[H]C1=C([H])C([H])=C(C2=NC3C(S2)=C(C([H])=C([H])C=3C2=C([H])C([H])=C3C(=C2[H])C([H])=C([H])N3[H])C2C([H])=C([H])C([H])=C3C([H])=C([H])N([H])C=23)C([H])=C1[H]	3.07431	5.663709000000001	1.872184	5.7035751900000005	1.02760928	3.0964773
[H]C1=C([H])C(=C(F)C(F)=C1[H])C1C([H])=C([H])C(=C(C=1[H])C1C([H])=C(F)C(F)=C([H])C=1[H])C(F)(F)F	3.77815	7.002228	1.5638	6.92162748	0.7438960000000003	3.6806645000000002
[H]C1=C([H])C(=C(F)C(F)=C1[H])C1C([H])=C(C([H])=C([H])C=1C(F)(F)F)C1C([H])=C(F)C(F)=C([H])C=1[H]	3.7134099999999997	7.014239999999999	1.5399719999999997	6.9325584	0.7219742399999998	3.6269302999999997
[H]C1=NC([H])=C(C(F)=C1[H])C1C([H])=C(C2=NC([H])=C([H])C(F)=C2[H])C([H])=C(F)C=1C([H])([H])[H]	3.60966	6.730592999999999	1.691496	6.674439629999998	0.8613763199999998	3.5408178
[H]C1=NC([H])=C(C(F)=C1[H])C1C([H])=C(F)C(=C(C2=NC([H])=C([H])C(F)=C2[H])C=1[H])C([H])([H])[H]	3.5274900000000002	6.713758	1.7541479999999998	6.65911978	0.91901616	3.4726167000000006
[H]C1=NC(F)=C(C([H])=C1[H])C1C(I)=C(C([H])=C(C=1[N+](=O)[O-])C([H])([H])[H])C1C([H])=NC(F)=C([H])C=1[H]	3.2145799999999998	6.954635000000001	2.5229	6.87831785	1.6262679999999996	3.2129014
[H]C1=NC(F)=C(C([H])=C1[H])C1C([H])=C(C(=C(C=1I)C1C([H])=NC(F)=C([H])C=1[H])[N+](=O)[O-])C([H])([H])[H]	3.2386500000000003	6.921602	2.5012800000000004	6.848257820000001	1.6063776	3.2328795
[H]C1=NC(=C(S1)C1=NC(=C(C2=NC(=C([H])S2)C([H])([H])[H])C([H])=C1[H])N([H])[H])C([H])([H])[H]	2.53232	5.848985	2.1273	5.87217635	1.2623160000000002	2.6466256
[H]C1=NC(=C(S1)C1C([H])=C([H])C(=NC=1N([H])[H])C1=NC(=C([H])S1)C([H])([H])[H])C([H])([H])[H]	2.22439	5.625125	2.269532	5.66846375	1.3931694399999999	2.3910437
[H]C1N=C(C(C#N)=C([H])C=1C1=C(C([H])=C([H])C([H])=C1C([H])([H])[H])N([H])[H])C1C([H])=C([H])C(=C([H])C=1C([H])([H])[H])N([H])[H]	3.0851	5.933979	1.7556200000000002	5.94952089	0.9203704000000004	3.1054330000000006
[H]C1=NC([H])=C(C([H])=C1C#N)C1C([H])=C([H])C(=C(C2=NC([H])=C([H])C([H])=C2C#N)C=1C([H])([H])[H])N([H])[H]	3.12743	5.9939480000000005	1.7362079999999995	6.00409268	0.9025113599999992	3.1405669
[H]C1N=C2C(=NC=1[H])N([H])C([H])=C2C1=NC([H])=C(C([H])=C1[N+](=O)[O-])C1N=C2C(=NC=1[H])N([H])C([H])=C2[H]	2.77883	6.751614	2.752716	6.69356874	1.8376987199999997	2.8512289
[H]C1N=C2C(=NC=1[H])N([H])C([H])=C2C1=C([H])N=C(C2N=C3C(=NC=2[H])N([H])C([H])=C3[H])C(=C1[H])[N+](=O)[O-]	2.63607	6.752797	2.8216240000000004	6.6946452700000005	1.90109408	2.7327381000000006
[H]C1C2=NC(=NN2C([H])=C(C=1[H])C1C([H])=C([H])C([H])=C2C(=O)C(=O)N([H])C=12)C1=C([H])C([H])=C2C(C(=O)C(=O)N2[H])=C1[H]	1.87579	6.553780000000001	2.915096	6.5135398	1.9870883199999998	2.1017057000000006
[H]C1C2=NC(=NN2C([H])=C(C=1[H])C1=C([H])C([H])=C2C(C(=O)C(=O)N2[H])=C1[H])C1C([H])=C([H])C([H])=C2C(=O)C(=O)N([H])C=12	1.8965400000000003	6.549412	2.931748	6.509564920000001	2.00240816	2.1189282000000005
[H]C1=NC([H])=C(C2C([H])=C([H])C(C3=NC([H])=C([H])N3[H])=C([H])C=2F)N1[H]	2.61532	5.7211300000000005	1.6308679999999995	5.7558283	0.8055985599999991	2.7155156000000003
[H]C1=NC([H])=C(C2C([H])=C([H])C(C3=NC([H])=C([H])N3[H])=C(F)C=2[H])N1[H]	2.56801	5.70657	1.6232319999999998	5.7425787	0.7985734399999993	2.6762483
[H]C1=NC(C2C([H])=C([H])N=C(C3=NC([H])=C([H])N4C3=NC(=C4[H])C([H])([H])[H])C=2C([H])([H])[H])=C([H])N2C1=NC(=C2[H])C([H])([H])[H]	3.0211900000000003	6.585448	2.080564	6.54235768	1.2193188799999994	3.0523877000000006
[H]C1=NC(C2=NC([H])=C([H])C(C3=NC([H])=C([H])N4C3=NC(=C4[H])C([H])([H])[H])=C2C([H])([H])[H])=C([H])N2C1=NC(=C2[H])C([H])([H])[H]	2.97637	6.5129209999999995	1.9111	6.47635811	1.0634120000000005	3.0151871000000003
[H]C1=NC([H])=C(C2=NC(C3=NC([H])=C([H])C(=C3[N+](=O)[O-])C([H])([H])[H])=C([H])N2C([H])([H])[H])C(=C1[N+](=O)[O-])C([H])([H])[H]	2.95811	6.323276999999999	2.23402	6.303782069999999	1.3604984	3.0000313
[H]C1=NC([H])=C(C2N=C(C3=NC([H])=C([H])C(=C3[N+](=O)[O-])C([H])([H])[H])N(C=2[H])C([H])([H])[H])C(=C1[N+](=O)[O-])C([H])([H])[H]	3.01289	6.43639	2.029412	6.406714900000001	1.1722590400000001	3.0454987000000004
[H]C1=NC([H])=C([H])C(C2C([H])=C3SC(=NC3=C(C3=NC([H])=C([H])C([H])=C3C([H])([H])[H])C=2[H])N([H])[H])=C1C([H])([H])[H]	3.26106	6.110064	1.3106160000000004	6.109758240000001	0.5109667199999999	3.2514798000000003
[H]C1=NC([H])=C([H])C(C2C([H])=C(C3=NC([H])=C([H])C([H])=C3C([H])([H])[H])C([H])=C3SC(=NC=23)N([H])[H])=C1C([H])([H])[H]	3.41793	6.119892	1.2078520000000001	6.11870172	0.4164238400000002	3.3816819000000002
[H]C1=C(F)C(=C([H])C(Cl)=C1C1=C([H])C(C2C(Cl)=C([H])C([H])=C(F)C=2N([H])[H])=C2C(=C1[H])C([H])([H])C([H])([H])C(=O)N2[H])N([H])[H]	3.38473	6.175493	1.188072	6.16929863	0.3982262399999996	3.3541258999999997
[H]C1=C(F)C(=C([H])C(Cl)=C1C1C([H])=C(C([H])=C2C=1N([H])C(=O)C([H])([H])C2([H])[H])C1C(Cl)=C([H])C([H])=C(F)C=1N([H])[H])N([H])[H]	3.3581699999999994	6.230366	1.2256999999999998	6.2192330600000005	0.43284399999999934	3.3320811
[H]C1C([H])=C([H])C(=C(N=C=S)C=1[H])C1=C([H])C(C2C([H])=C([H])C([H])=C(N=C=S)C=2[H])=C(C(=C1[H])C([H])([H])N(C([H])([H])[H])C1([H])C([H])([H])C([H])([H])C([H])([H])C([H])([H])C1([H])[H])N([H])[H]	3.3009000000000004	5.801756	1.4473279999999995	5.82919796	0.6367417599999996	3.2845470000000003
[H]C1C([H])=C([H])C(=C(N=C=S)C=1[H])C1C([H])=C(C([H])=C(C=1N([H])[H])C([H])([H])N(C([H])([H])[H])C1([H])C([H])([H])C([H])([H])C([H])([H])C([H])([H])C1([H])[H])C1C([H])=C([H])C([H])=C(N=C=S)C=1[H]	3.37892	5.790381	1.4339879999999998	5.81884671	0.6244689599999997	3.3493036
[H]C1=NC2=C(C([H])=NN2C([H])=C1[H])C1=NC(C(=O)OC([H])([H])[H])=C(C2C([H])=NC3=C([H])C([H])=NN3C=2[H])N1[H]	2.51323	6.131176	2.0514919999999996	6.12897016	1.1925726399999999	2.6307809000000004
[H]C1=NC2=C(C([H])=NN2C([H])=C1[H])C1=C(N=C(C2C([H])=NC3=C([H])C([H])=NN3C=2[H])N1[H])C(=O)OC([H])([H])[H]	2.58378	6.203703	2.042568	6.19496973	1.1843625600000003	2.6893374000000003
[H]C1C([H])=C(F)C(=C(C=1F)C1C([H])=C(Cl)C(Cl)=C(C=1[H])C1C([H])=C(F)C(=C([H])C=1F)N([H])[H])N([H])[H]	3.3722800000000004	6.244471	1.4537679999999995	6.23206861	0.6426665599999994	3.3437924000000003
[H]C1C([H])=C(F)C(=C(C=1F)C1C([H])=C(C([H])=C(Cl)C=1Cl)C1C([H])=C(F)C(=C([H])C=1F)N([H])[H])N([H])[H]	3.3241400000000003	6.317361999999998	1.4405200000000002	6.298399419999998	0.6304784000000003	3.3038362
[H]C1C([H])=C([H])C(=C(Cl)C=1[H])C1C([H])=C([H])C(=C([H])C=1C([H])(C([H])([H])[H])C([H])([H])[H])C1C([H])=C([H])C(Cl)=C([H])C=1[H]	3.90265	6.495449000000002	1.0957040000000005	6.460458590000002	0.3132476799999999	3.7839995
[H]C1C([H])=C([H])C(=C(Cl)C=1[H])C1C([H])=C([H])C(C2C([H])=C([H])C(Cl)=C([H])C=2[H])=C(C=1[H])C([H])(C([H])([H])[H])C([H])([H])[H]	3.80056	6.536944999999999	1.1350799999999994	6.498219949999999	0.3494735999999996	3.6992648
[H]C1=C([H])C([H])=C(C([H])=C1[H])C1C([H])=C([H])C(=C([H])C=1C1=C(F)C([H])=C(F)C([H])=C1N([H])[H])C1C(F)=C([H])C(=C([H])C=1F)N([H])[H]	3.4461500000000003	5.973655	1.1228439999999995	5.9856260500000005	0.3382164799999998	3.4051045
[H]C1=C([H])C([H])=C(C([H])=C1[H])C1C([H])=C([H])C(=C([H])C=1C1C(F)=C([H])C(=C([H])C=1F)N([H])[H])C1=C(F)C([H])=C(F)C([H])=C1N([H])[H]	3.33576	6.034534	1.0948760000000002	6.04102594	0.3124859200000003	3.3134808000000002
[H]C1=NC([H])=C(C([H])=C1C(F)(F)F)C1C(=NC(=NC=1[H])C1=NC([H])=C([H])C([H])=C1C(F)(F)F)C([H])([H])[H]	3.00376	7.036171	2.5666919999999998	6.952515610000001	1.6665566399999996	3.0379208
[H]C1=NC([H])=C(C2=NC([H])=C(C3=NC([H])=C([H])C([H])=C3C(F)(F)F)C(=N2)C([H])([H])[H])C([H])=C1C(F)(F)F	2.99463	7.0375359999999985	2.481408	6.9537577599999985	1.58809536	3.0303429
[H]C1=NC(F)=C(C([H])=C1[H])C1C([H])=C(C([H])=C(C=1N([H])[H])C([H])([H])[H])C1C([H])=NC(F)=C([H])C=1[H]	3.23533	5.882109	1.1339759999999997	5.90231919	0.34845791999999953	3.2301238999999997
[H]C1=NC(F)=C(C([H])=C1C1C([H])=C([H])C([H])=C(C=1N([H])[H])C([H])([H])[H])C1=C([H])C([H])=C(C(=C1[H])C([H])([H])[H])N([H])[H]	3.13988	5.874465	1.1066519999999995	5.89536315	0.323319839999999	3.1509004000000003
[H]C1N=C(C([H])=C(C=1C1C([H])=C(C([H])=C([H])C=1F)N([H])[H])C([H])([H])[H])C1=C([H])C(F)=C([H])C([H])=C1N([H])[H]	2.99878	5.985849	1.4968240000000002	5.99672259	0.6822780799999997	3.0337874000000005
[H]C1N=C(C([H])=C(C=1C1=C([H])C(F)=C([H])C([H])=C1N([H])[H])C([H])([H])[H])C1C([H])=C(C([H])=C([H])C=1F)N([H])[H]	3.09423	5.9604599999999985	1.5070359999999998	5.973618599999998	0.6916731199999999	3.1130109
[H]C1=NC([H])=C(F)C(C2=NC([H])=C3C(=N2)C([H])=C([H])C(C2=NC([H])=C(F)C([H])=C2[H])=C3[H])=C1[H]	2.8850700000000002	6.799662	2.438996	6.737292419999999	1.5490763200000002	2.9394081000000005
[H]C1=NC([H])=C(F)C(=C1[H])C1C([H])=C([H])C2=NC(=NC([H])=C2C=1[H])C1=NC([H])=C(F)C([H])=C1[H]	2.84689	6.784374000000001	2.55188	6.72338034	1.6529296000000002	2.9077187
[H]C1N=C2C(C3=NC(C4=C([H])N=C5C([H])=C([H])C(=C([H])N54)C([H])([H])[H])=C(N3[H])C([H])([H])[H])=C([H])C(=C([H])N2C=1[H])C([H])([H])[H]	2.82863	5.2528440000000005	1.1164040000000002	5.329688040000001	0.33229168	2.8925629
[H]C1N=C2C(=C([H])C(=C([H])N2C=1[H])C([H])([H])[H])C1N=C(C2=C([H])N=C3C([H])=C([H])C(=C([H])N32)C([H])([H])[H])N([H])C=1C([H])([H])[H]	2.64354	5.233825	1.1906479999999997	5.312380750000001	0.4005961599999992	2.7389381999999998
[H]C(=O)C1C(F)=C(C([H])=C([H])C=1C1=NC([H])=C(N=C1Cl)N([H])[H])C1N=C([H])C(Cl)=NC=1N([H])[H]	2.7730200000000003	6.54195	2.457304	6.5027745	1.5659196800000004	2.8464066000000003
[H]C(=O)C1C(F)=C(C2=NC([H])=C(N=C2Cl)N([H])[H])C([H])=C([H])C=1C1N=C([H])C(Cl)=NC=1N([H])[H]	2.8278	6.5282089999999995	2.434948	6.4902701899999995	1.5453521599999998	2.891874
[H]C1OC2C([H])=C([H])C(=C([H])C=2C=1[H])C1C([H])=C([H])C2C([H])=C([H])C(=NC=2C=1[H])C1=C([H])OC2C([H])=C([H])C([H])=C([H])C=21	3.09506	6.107061	1.7891079999999997	6.10702551	0.9511793599999994	3.1136998
[H]C1OC2C([H])=C([H])C(C3=NC4C([H])=C(C([H])=C([H])C=4C([H])=C3[H])C3=C([H])OC4C([H])=C([H])C([H])=C([H])C=43)=C([H])C=2C=1[H]	3.15316	6.1967870000000005	1.778988	6.188676170000001	0.9418689599999999	3.1619228
[H]C1=NC(=C(C2=NC(C3=NC(=C([H])N3[H])[N+](=O)[O-])=C([H])N(C2=O)C([H])([H])[H])N1[H])[N+](=O)[O-]	2.30241	6.660158999999999	3.009856	6.61034469	2.0742675200000003	2.4558003
[H]C1=NC(=C(C2=NC(C3=NC(=C([H])N3[H])[N+](=O)[O-])=C([H])N(C2=O)C([H])([H])[H])N1[H])[N+](=O)[O-]	2.53398	6.670350999999999	2.82006	6.619619409999999	1.8996551999999998	2.6480034000000003
[H]C1=NC([H])=C(N=C1C(=O)C([H])([H])[H])C1=C(C(=NN1[H])C1=NC([H])=C([H])N=C1C(=O)C([H])([H])[H])[N+](=O)[O-]	2.42193	7.351304000000002	3.22118	7.239286640000001	2.2686856	2.5550019000000006
[H]C1=NC([H])=C(N=C1C(=O)C([H])([H])[H])C1=NN([H])C(C2=NC([H])=C([H])N=C2C(=O)C([H])([H])[H])=C1[N+](=O)[O-]	2.4775400000000003	7.315722999999999	3.354396	7.20690793	2.3912443199999998	2.6011582000000004
[H]C1=NC2C([H])=NC([H])=C([H])C=2C(=C1[H])C1C([H])=C(Cl)C(F)=C(C2=NC3C([H])=NC([H])=C([H])C=3C([H])=C2[H])C=1[H]	3.1440300000000003	6.842523	2.4378	6.77629593	1.5479760000000002	3.1543449000000003
[H]C1=NC2C([H])=NC([H])=C([H])C=2C(=C1[H])C1C([H])=C(C2=NC3C([H])=NC([H])=C([H])C=3C([H])=C2[H])C([H])=C(Cl)C=1F	3.17972	6.871097	2.4172839999999995	6.80229827	1.5291012799999995	3.1839676000000003
[H]C1=NC(F)=C(C2C([H])=C(C3=NC(F)=C([H])N3C([H])([H])[H])C([H])=C([H])C=2N=C=S)N1C([H])([H])[H]	3.06933	6.079943	1.7715360000000002	6.08234813	0.9350131199999998	3.0923439000000004
[H]C1=NC(F)=C(C2C([H])=C([H])C(N=C=S)=C(C3=NC(F)=C([H])N3C([H])([H])[H])C=2[H])N1C([H])([H])[H]	3.06186	6.068386	1.902636	6.07183126	1.0556251200000002	3.0861438000000003
[H]C1N=C2C(C3=NC(=C(C4=C([H])N=C5C([H])=C([H])C(=C([H])N54)C([H])([H])[H])N3C([H])([H])[H])C([H])([H])[H])=C([H])C(=C([H])N2C=1[H])C([H])([H])[H]	2.74646	5.424288	1.1674639999999998	5.485702079999999	0.3792668799999994	2.8243618
[H]C1N=C2C(=C([H])C(=C([H])N2C=1[H])C([H])([H])[H])C1=C(N=C(C2=C([H])N=C3C([H])=C([H])C(=C([H])N32)C([H])([H])[H])N1C([H])([H])[H])C([H])([H])[H]	2.79626	5.541678	1.2171439999999991	5.592526980000001	0.4249724799999992	2.8656958
[H]C(=O)C1C(=NC([H])=C([H])C=1[H])C1C([H])=C(C(=C([H])C=1[N+](=O)[O-])C1C([H])=C([H])N=C([H])C=1C([H])=O)N([H])C(=O)C([H])([H])[H]	2.69085	7.206886999999999	2.949596	7.107867169999999	2.01882832	2.7782055000000003
[H]C(=O)C1C(=NC([H])=C([H])C=1[H])C1=C([H])C(=C(C([H])=C1N([H])C(=O)C([H])([H])[H])C1C([H])=C([H])N=C([H])C=1C([H])=O)[N+](=O)[O-]	2.63109	7.259485000000001	2.975908	7.155731350000001	2.04303536	2.7286047
[H]C1=NC([H])=C(C2C(F)=C(C3=NC([H])=C([H])N4C3=NC([H])=C4[H])C([H])=C(F)C=2N([H])[H])N2C1=NC([H])=C2[H]	2.71824	6.079397	1.9536039999999997	6.0818512700000005	1.1025156799999998	2.8009392
[H]C1=NC([H])=C(C2C([H])=C(F)C(=C(C3=NC([H])=C([H])N4C3=NC([H])=C4[H])C=2F)N([H])[H])N2C1=NC([H])=C2[H]	2.78713	6.0871319999999995	1.928304	6.088890119999999	1.0792396799999997	2.8581179
[H]C1=NC([H])=C(C2=C(C(=C([H])C(C3=NC([H])=C([H])C(=C3[N+](=O)[O-])C([H])([H])[H])=C2[N+](=O)[O-])C([H])([H])[H])N([H])[H])C(=C1[N+](=O)[O-])C([H])([H])[H]	2.25676	6.644962	3.073244	6.596515419999999	2.13258448	2.4179108
[H]C1=NC([H])=C(C2C([H])=C(C(=C(C3=NC([H])=C([H])C(=C3[N+](=O)[O-])C([H])([H])[H])C=2[N+](=O)[O-])N([H])[H])C([H])([H])[H])C(=C1[N+](=O)[O-])C([H])([H])[H]	2.4401900000000003	6.649602999999999	3.0927480000000003	6.60073873	2.1505281600000004	2.5701577
[H]C1=C([H])C(=C([H])C(=C1Cl)C1=C([H])C(C2=C([H])C(Cl)=C([H])C([H])=C2C([H])([H])[H])=C(C(=C1[H])C([H])(C([H])([H])[H])C([H])([H])[H])N([H])[H])C([H])([H])[H]	3.35651	5.912321	0.91474	5.92981211	0.14676080000000002	3.3307033
[H]C1=C([H])C(=C([H])C(=C1Cl)C1C([H])=C(C([H])=C(C=1N([H])[H])C([H])(C([H])([H])[H])C([H])([H])[H])C1=C([H])C(Cl)=C([H])C([H])=C1C([H])([H])[H])C([H])([H])[H]	3.4735400000000003	5.929884	0.9411439999999996	5.94579444	0.17105247999999929	3.4278382
[H]C(=O)C1C([H])=C([H])C(=NC=1C1C(Cl)=C([H])C([H])=C(C=1Cl)C([H])([H])[H])C1C([H])=C(Cl)C([H])=C(Cl)C=1C([H])([H])[H]	2.82697	7.059558000000001	2.642132	6.973797780000001	1.73596144	2.8911851000000004
[H]C(=O)C1=C([H])N=C(C([H])=C1[H])C1C(Cl)=C([H])C(C2N=C([H])C([H])=C([H])C=2C([H])=O)=C(C=1Cl)C([H])([H])[H]	2.82614	7.071024	2.640844	6.9842318400000005	1.7347764799999998	2.8904962000000003
[H]C1=NN2C(=N1)C(=NC(C1C([H])=C(OC(F)(F)F)C(N=C=S)=C([H])C=1[H])=C2[H])C1C([H])=C([H])C([H])=C(OC(F)(F)F)C=1N=C=S	2.95479	6.684274	2.642224	6.63228934	1.73604608	2.9972757000000003
[H]C1=NN2C(=N1)C(=NC(C1C([H])=C([H])C([H])=C(OC(F)(F)F)C=1N=C=S)=C2[H])C1C([H])=C(OC(F)(F)F)C(N=C=S)=C([H])C=1[H]	2.82614	6.610928	2.57488	6.56554448	1.6740895999999998	2.8904962000000003
[H]C(=O)C1=C([H])C(C2=NC([H])=C([H])N2C([H])([H])[H])=C(C([H])=O)C([H])=C1C1N=C([H])N(C=1[H])C([H])([H])[H]	2.33146	6.320001	2.680772	6.30080091	1.77151024	2.4799118
[H]C(=O)C1=C([H])C(C2N=C([H])N(C=2[H])C([H])([H])[H])=C(C([H])=O)C([H])=C1C1=NC([H])=C([H])N1C([H])([H])[H]	2.51821	6.325825	2.6057919999999997	6.306100750000001	1.7025286399999997	2.6349143
[H]C1=C([H])C(=C(Cl)C(=C1[H])C([H])([H])[H])C1C([H])=C([H])C(N=C=S)=C(C=1[H])C1C([H])=C([H])C([H])=C(Cl)C=1C([H])([H])[H]	3.64203	6.4356620000000015	1.7271	6.406052420000002	0.8941319999999999	3.5676849
[H]C1=C([H])C(=C(Cl)C(=C1[H])C([H])([H])[H])C1C([H])=C(C([H])=C([H])C=1N=C=S)C1C([H])=C([H])C([H])=C(Cl)C=1C([H])([H])[H]	3.5731399999999995	6.462688999999999	1.660768	6.43064699	0.83310656	3.5105062
[H]C(=O)C1C(F)=C([H])C(=C([H])C=1C1C(OC([H])([H])[H])=C([H])C([H])=C2N=C([H])C([H])=C([H])C=12)C1C([H])=C(OC([H])([H])[H])C([H])=C2C([H])=C([H])C([H])=NC=12	2.78547	6.392619	2.387384	6.36688329	1.5015932799999998	2.8567401000000006
[H]C(=O)C1C(F)=C([H])C(=C([H])C=1C1C([H])=C(OC([H])([H])[H])C([H])=C2C([H])=C([H])C([H])=NC=12)C1C(OC([H])([H])[H])=C([H])C([H])=C2N=C([H])C([H])=C([H])C=12	2.6775700000000002	6.3812440000000015	2.470644	6.356532040000001	1.5781924800000002	2.7671831000000005
[H]C1=C([H])C(C2=NN([H])C(=N2)C2=C([H])C([H])=C(C(=C2[H])C([H])([H])N(C([H])([H])[H])C2([H])C([H])([H])C([H])([H])C([H])([H])C([H])([H])C2([H])[H])N([H])[H])=C(C(=C1[H])C([H])([H])N(C([H])([H])[H])C1([H])C([H])([H])C([H])([H])C([H])([H])C([H])([H])C1([H])[H])N([H])[H]	2.95728	5.807671	1.0207239999999995	5.83458061	0.24426607999999916	2.9993424
[H]C1=C([H])C(C2=NC(=NN2[H])C2=C([H])C([H])=C(C(=C2[H])C([H])([H])N(C([H])([H])[H])C2([H])C([H])([H])C([H])([H])C([H])([H])C([H])([H])C2([H])[H])N([H])[H])=C(C(=C1[H])C([H])([H])N(C([H])([H])[H])C1([H])C([H])([H])C([H])([H])C([H])([H])C([H])([H])C1([H])[H])N([H])[H]	3.09921	5.738784	0.9326800000000004	5.7718934399999995	0.1632655999999999	3.1171443
[H]C1=NC([H])=C(C2=NC([H])=C([H])C3N=C(SC=32)C2=NC([H])=C([H])C(=C2[H])N([H])[H])C(=C1[H])N([H])[H]	2.73235	6.4367540000000005	2.4016439999999997	6.40704614	1.5147124799999996	2.8126505
[H]C1=NC([H])=C(C2=NC3C([H])=C([H])N=C(C4=NC([H])=C([H])C(=C4[H])N([H])[H])C=3S2)C(=C1[H])N([H])[H]	2.78215	6.374600999999998	2.4653080000000003	6.350486909999999	1.5732833600000005	2.8539845
[H]C1=NC(=C([H])N=C1C1C([H])=C([H])C([H])=C(C=1N([H])[H])C([H])([H])N(C([H])([H])[H])C1([H])C([H])([H])C([H])([H])C([H])([H])C([H])([H])C1([H])[H])C1=C([H])C([H])=C(C(=C1[H])C([H])([H])N(C([H])([H])[H])C1([H])C([H])([H])C([H])([H])C([H])([H])C([H])([H])C1([H])[H])N([H])[H]	2.91661	5.872736	1.7600359999999995	5.89378976	0.9244331199999998	2.9655863
[H]C1=NC(=C([H])N=C1C1=C([H])C([H])=C(C(=C1[H])C([H])([H])N(C([H])([H])[H])C1([H])C([H])([H])C([H])([H])C([H])([H])C([H])([H])C1([H])[H])N([H])[H])C1C([H])=C([H])C([H])=C(C=1N([H])[H])C([H])([H])N(C([H])([H])[H])C1([H])C([H])([H])C([H])([H])C([H])([H])C([H])([H])C1([H])[H]	2.944	5.804941	1.7213040000000002	5.832096310000001	0.88879968	2.98832
[H]C1=NC2=C(C3C([H])=C([H])C([H])=C([H])C=3C([H])(C([H])([H])[H])C([H])([H])[H])C(=C(C([H])=C2N1[H])C1C([H])=C([H])C([H])=C(C=1[H])C([H])(C([H])([H])[H])C([H])([H])[H])N([H])[H]	3.0120599999999995	5.666347999999998	1.1442800000000002	5.705976679999998	0.35793759999999963	3.0448097999999995
[H]C1=NC2=C(C3C([H])=C([H])C([H])=C(C=3[H])C([H])(C([H])([H])[H])C([H])([H])[H])C(=C(C([H])=C2N1[H])C1C([H])=C([H])C([H])=C([H])C=1C([H])(C([H])([H])[H])C([H])([H])[H])N([H])[H]	2.98218	5.725953	1.1264320000000003	5.760217229999999	0.3415174400000005	3.0200094
[H]C1=NN([H])C(=N1)C1=C([H])C(=NC(C2=NN([H])C([H])=N2)=C1N([H])[H])C(F)(F)F	2.61449	6.508098	2.0654760000000003	6.47196918	1.2054379200000005	2.7148267
[H]C1N=C(C([H])=C(C2=NN([H])C(=N2)C2N=C(C([H])=C([H])C=2N([H])[H])C(F)(F)F)C=1N([H])[H])C(F)(F)F	2.72571	6.54741	2.044868	6.507743100000001	1.1864785600000003	2.8071393000000002
[H]C1=NC(C2N=C(C3=NC([H])=C([H])N4C3=NC([H])=C4Cl)N(C=2[H])C([H])([H])[H])=C([H])N2C1=NC([H])=C2Cl	2.89088	6.006779	1.7049279999999998	6.01576889	0.8737337599999995	2.9442304000000004
[H]C1=NC(C2=NC(C3=NC([H])=C([H])N4C3=NC([H])=C4Cl)=C([H])N2C([H])([H])[H])=C([H])N2C1=NC([H])=C2Cl	2.79294	6.006961	1.834004	6.01593451	0.9924836800000003	2.8629402000000006
[H]C1=C([H])C(=C(F)C(=C1[H])C([H])([H])[H])C1C([H])=C(C([H])=C2C=1C(=NN2[H])N([H])[H])C1C([H])=C([H])C([H])=C(F)C=1C([H])([H])[H]	2.92823	5.726954	1.3063839999999995	5.76112814	0.5070732799999993	2.9752309000000006
[H]C1=C([H])C(=C(F)C(=C1[H])C([H])([H])[H])C1=C([H])C(=C2C(=NN([H])C2=C1[H])N([H])[H])C1C([H])=C([H])C([H])=C(F)C=1C([H])([H])[H]	2.91661	5.714487	1.256704	5.749783170000001	0.4613676799999995	2.9655863
[H]C1=NC([H])=C(C2C([H])=C(C(=C(C3=NC([H])=C([H])N3[H])C=2I)[N+](=O)[O-])C([H])([H])[H])N1[H]	2.47173	6.446582	2.5436	6.41598962	1.6453119999999997	2.5963359
[H]C1=NC([H])=C(C2C(I)=C(C3=NC([H])=C([H])N3[H])C([H])=C(C=2[N+](=O)[O-])C([H])([H])[H])N1[H]	2.51572	6.4260160000000015	2.424092	6.397274560000001	1.53536464	2.6328476
[H]C1=NC(=NC([H])=C1C1C([H])=C([H])C([H])=C2N=C(Cl)SC=12)C1C([H])=C([H])C([H])=C2SC(Cl)=NC=12	2.80539	6.534852000000001	2.532468	6.496315320000001	1.63507056	2.8732737000000004
[H]C1=NC(=NC([H])=C1C1C([H])=C([H])C([H])=C2SC(Cl)=NC=12)C1C([H])=C([H])C([H])=C2N=C(Cl)SC=12	2.8859	6.5212020000000015	2.479384	6.483893820000001	1.58623328	2.940097
[H]C1=NC([H])=C2C([H])=C(C([H])=C([H])N12)C1C([H])=C(F)C(Cl)=C(C=1[H])C1=C([H])C([H])=C([H])C2=C([H])N=C([H])N21	2.5472599999999996	5.7497950000000015	1.6477039999999996	5.781913450000001	0.8210876799999998	2.6590257999999998
[H]C1=NC([H])=C2C([H])=C(C([H])=C(C3C([H])=C(F)C(Cl)=C([H])C=3[H])N12)C1C([H])=C([H])C([H])=C(F)C=1Cl	2.61781	5.7204929999999985	1.5991279999999994	5.755248629999999	0.7763977599999992	2.7175823
[H]C1=NN2C(=N1)C([H])=C(C([H])=C2[H])C1=C([H])C(C2=NN3C(=N2)C([H])=C([H])C([H])=C3[H])=C(F)C([H])=C1OC([H])([H])[H]	3.3009000000000004	6.200973	1.4192679999999998	6.1924854300000005	0.6109265599999993	3.2845470000000003
[H]C1=NN2C(=N1)C([H])=C(C([H])=C2[H])C1C([H])=C(C2=NN3C(=N2)C([H])=C([H])C([H])=C3[H])C(OC([H])([H])[H])=C([H])C=1F	3.31501	6.231822	1.3958080000000002	6.22055802	0.58934336	3.2962583
[H]C1=NC(F)=C(C([H])=C1C1=NC([H])=C([H])C([H])=C1N([H])[H])C1C([H])=C([H])N=C([H])C=1N([H])[H]	3.1672700000000003	6.334379	1.5007799999999998	6.313884890000001	0.6859175999999998	3.1736341
[H]C1=NC(F)=C(C2=NC([H])=C([H])C([H])=C2N([H])[H])C([H])=C1C1C([H])=C([H])N=C([H])C=1N([H])[H]	2.9365300000000003	6.301164	1.6220359999999996	6.28365924	0.7974731199999994	2.9821199000000007
[H]C1SC(C2C([H])=C(C(=C([H])C=2Cl)C2SC([H])=C(C=2[H])C([H])([H])C([H])([H])C([H])([H])C([H])([H])[H])C([H])([H])[H])=C(C=1[H])C([H])([H])C([H])([H])C([H])([H])C([H])([H])[H]	2.93985	5.918508999999999	1.62268	5.935443189999999	0.7980656000000002	2.9848755000000002
[H]C1SC(C2=C([H])C(Cl)=C(C([H])=C2C([H])([H])[H])C2SC([H])=C(C=2[H])C([H])([H])C([H])([H])C([H])([H])C([H])([H])[H])=C(C=1[H])C([H])([H])C([H])([H])C([H])([H])C([H])([H])[H]	3.01455	5.9681039999999985	1.5824759999999998	5.980574639999999	0.76107792	3.0468764999999998
[H]C(=O)C1=C([H])C(=C([H])C([H])=C1OC([H])(C([H])([H])[H])C([H])([H])[H])C1=C(F)C([H])=C(C(=C1F)C1C([H])=C([H])C([H])=C(C([H])=O)C=1OC([H])(C([H])([H])[H])C([H])([H])[H])N([H])[H]	2.82448	6.1353620000000015	1.959124	6.132779420000001	1.1075940800000001	2.8891184
[H]C(=O)C1=C([H])C(=C([H])C([H])=C1OC([H])(C([H])([H])[H])C([H])([H])[H])C1=C(F)C(=C(F)C([H])=C1N([H])[H])C1C([H])=C([H])C([H])=C(C([H])=O)C=1OC([H])(C([H])([H])[H])C([H])([H])[H]	2.6750800000000003	6.207343	1.99436	6.19828213	1.1400112	2.7651164
[H]C1N=C(C2C3=NSN=C3C([H])=C(F)C=2[H])C(=C([H])C=1C1C2=NSN=C2C([H])=C([H])C=1F)C(F)(F)F	2.73235	6.8568099999999985	3.2992879999999998	6.789297099999999	2.34054496	2.8126505
[H]C1N=C(C2C3=NSN=C3C([H])=C([H])C=2F)C(=C([H])C=1C1C2=NSN=C2C([H])=C(F)C=1[H])C(F)(F)F	2.70994	6.8223210000000005	3.30582	6.75791211	2.3465544	2.7940502
[H]C1=C([H])C(C2C(F)=C(C([H])=C(Cl)C=2N([H])[H])C2=C([H])C([H])=C(C(=C2[H])N([H])[H])C([H])([H])[H])=C(C(=C1[H])N([H])[H])C([H])([H])[H]	3.3606599999999998	5.870097	0.9939520000000002	5.89138827	0.21963583999999958	3.3341478
[H]C1=C([H])C(C2C([H])=C(Cl)C(=C(C=2F)C2=C([H])C([H])=C(C(=C2[H])N([H])[H])C([H])([H])[H])N([H])[H])=C(C(=C1[H])N([H])[H])C([H])([H])[H]	3.3623199999999995	5.880380000000001	0.9370959999999996	5.900745800000001	0.1673283199999993	3.3355255999999995
[H]C1=NN([H])C(C2=NC([H])=C(C3=NN([H])C([H])=C3[N+](=O)[O-])C([H])=C2Cl)=C1[N+](=O)[O-]	3.3340999999999994	7.424195	2.80994	7.30561745	1.8903448000000003	3.3121029999999996
[H]C1=NN([H])C(C2=C([H])N=C(C3=NN([H])C([H])=C3[N+](=O)[O-])C(Cl)=C2[H])=C1[N+](=O)[O-]	3.25525	7.460868	2.874248	7.33898988	1.9495081600000002	3.2466575000000004
[H]C1=NC(C2=C([H])C(C3=NC([H])=C([H])N4C3=NC([H])=C4[H])=C(C(C(=O)C([H])([H])[H])=C2[H])N([H])[H])=C([H])N2C1=NC([H])=C2[H]	2.64354	5.973746	1.832164	5.98570886	0.9907908799999996	2.7389381999999998
[H]C1=NC(C2C([H])=C(C3=NC([H])=C([H])N4C3=NC([H])=C4[H])C([H])=C(C(=O)C([H])([H])[H])C=2N([H])[H])=C([H])N2C1=NC([H])=C2[H]	2.42857	5.897761000000001	1.9697959999999999	5.91656251	1.1174123199999997	2.5605131000000005
[H]C1=C([H])C(=C([H])C(=C1OC([H])([H])[H])C1C(Cl)=C([H])C([H])=C(F)C=1N([H])[H])C1C([H])=C(F)C(=C([H])C=1Cl)N([H])[H]	3.4743699999999995	6.07512	0.922008	6.0779592000000005	0.15344735999999948	3.4285270999999997
[H]C1=C([H])C(=C([H])C(=C1OC([H])([H])[H])C1C(Cl)=C([H])C([H])=C(F)C=1N([H])[H])C1C([H])=C(F)C(=C([H])C=1Cl)N([H])[H]	3.40631	6.128901	0.947768	6.12689991	0.17714655999999973	3.3720373
[H]C1=NC([H])=C(C2=C([H])C(C3=NC([H])=C([H])C(=C3[H])C(F)(F)F)=C(Cl)C(C#N)=C2N([H])[H])C(=C1[H])C(F)(F)F	3.03364	6.46369	2.094548	6.4315579	1.23218416	3.0627212000000004
[H]C1=NC([H])=C(C2C([H])=C(C3=NC([H])=C([H])C(=C3[H])C(F)(F)F)C(=C(C#N)C=2Cl)N([H])[H])C(=C1[H])C(F)(F)F	3.02451	6.43093	1.914412	6.4017463	1.0664590399999998	3.0551433
[H]C(=O)C1C(F)=C([H])C(=C([H])C=1C1=NC([H])=C(Cl)C([H])=C1[H])C1=C([H])C([H])=NC([H])=C1Cl	2.65516	7.108242999999999	2.67792	7.018101129999999	1.7688863999999995	2.7485828000000003
[H]C(=O)C1C(F)=C([H])C(C2=NC([H])=C(Cl)C([H])=C2[H])=C([H])C=1C1=C([H])C([H])=NC([H])=C1Cl	2.68089	7.017971000000001	2.59926	6.935953610000001	1.6965192	2.7699387000000004
[H]C1N=C(C2C([H])=C(OC([H])([H])[H])C(=C([H])C=2[H])N([H])[H])C(=C([H])C=1C1C([H])=C([H])C([H])=C(OC([H])([H])[H])C=1N([H])[H])N([H])[H]	2.9274	5.535126	1.1632319999999998	5.5865646600000005	0.3753734399999997	2.9745420000000005
[H]C1N=C(C2C([H])=C([H])C([H])=C(OC([H])([H])[H])C=2N([H])[H])C(=C([H])C=1C1C([H])=C(OC([H])([H])[H])C(=C([H])C=1[H])N([H])[H])N([H])[H]	3.0602	5.483619999999999	1.1291919999999998	5.5396942	0.3440566399999998	3.084766
[H]C1=NN=C(C2=NC(=C(C3=NN=C([H])C(=C3[H])C([H])([H])[H])C([H])=C2[H])C([H])([H])[H])C(=C1[H])C([H])([H])[H]	2.89005	6.7092990000000015	2.094824	6.655062090000001	1.2324380799999997	2.9435415000000003
[H]C1=NN=C(C2C([H])=C([H])C(=NC=2C([H])([H])[H])C2=NN=C([H])C(=C2[H])C([H])([H])[H])C(=C1[H])C([H])([H])[H]	2.85021	6.682727000000001	2.229144	6.630881570000001	1.3560124799999995	2.9104743
[H]C(=O)C1SC(=NC=1C1=NC([H])=C([H])C([H])=C1C#N)C1=C([H])N=C([H])C(C#N)=C1[H]	2.7921099999999996	7.1078790000000005	3.340412	7.01776989	2.37837904	2.8622512999999996
[H]C(=O)C1SC(=NC=1C1=C([H])N=C([H])C(C#N)=C1[H])C1=NC([H])=C([H])C([H])=C1C#N	2.81286	7.088678	3.345012	7.00029698	2.38261104	2.8794738000000004
[H]C1=C([H])C(C2=NC(C3C([H])=C(OC([H])(F)F)C(=C([H])C=3[H])N([H])[H])=C(N=C2N([H])[H])C([H])([H])[H])=C(C(OC([H])(F)F)=C1[H])N([H])[H]	2.90499	5.8287830000000005	1.6723599999999998	5.853792530000001	0.8437711999999999	2.9559417000000003
[H]C1=C([H])C(C2N=C(C(=NC=2C([H])([H])[H])N([H])[H])C2C([H])=C(OC([H])(F)F)C(=C([H])C=2[H])N([H])[H])=C(C(OC([H])(F)F)=C1[H])N([H])[H]	2.7614	5.762716999999999	1.6061199999999998	5.79367247	0.7828303999999999	2.8367620000000002
[H]C1=NC(C2C([H])=C([H])C3N=C(SC=3C=2[H])C2=NC([H])=C([H])N3C2=NC(=C3[H])C([H])([H])[H])=C([H])N2C1=NC(=C2[H])C([H])([H])[H]	2.9257400000000002	6.225361	2.209732	6.214678510000001	1.3381534400000001	2.9731642000000003
[H]C1=NC(C2=NC3C([H])=C([H])C(C4=NC([H])=C([H])N5C4=NC(=C5[H])C([H])([H])[H])=C([H])C=3S2)=C([H])N2C1=NC(=C2[H])C([H])([H])[H]	2.7232199999999995	6.205341000000001	2.35546	6.196460310000001	1.4722231999999997	2.8050726
[H]C1C([H])=C([H])C(=C(C=1[H])C1N=C(C2C([H])=C([H])C(=C([H])C=2[H])C([H])([H])[H])C(=C([H])C=1N([H])[H])C([H])([H])[H])C([H])([H])[H]	3.1946600000000003	5.864546000000002	1.2266199999999996	5.886336860000002	0.4336903999999997	3.1963678000000004
[H]C1C([H])=C([H])C(=C(C2=NC(C3C([H])=C([H])C(=C([H])C=3[H])C([H])([H])[H])=C(C([H])=C2C([H])([H])[H])N([H])[H])C=1[H])C([H])([H])[H]	3.2768300000000004	5.926517	1.1772160000000005	5.94273047	0.38823872000000037	3.2645689000000004
[H]C1N=C2C(=C([H])C(Cl)=C([H])N2C=1[H])C1C([H])=C(C([H])=C([H])C=1C([H])([H])C#N)C1=C([H])N=C2C([H])=C([H])C(Cl)=C([H])N21	2.76887	6.093775	1.5954479999999998	6.09493525	0.7730121599999995	2.8429621000000003
[H]C1N=C2C(=C([H])C(Cl)=C([H])N2C=1[H])C1C([H])=C([H])C(=C(C=1[H])C1=C([H])N=C2C([H])=C([H])C(Cl)=C([H])N21)C([H])([H])C#N	2.8576799999999998	6.13609	1.5180759999999998	6.1334419	0.7018299199999998	2.9166744
[H]C(=O)C1C([H])=C(C([H])=C([H])C=1C1=C([H])C(C(=O)Cl)=C([H])C([H])=C1C(=O)Cl)C1C([H])=C(C(=O)Cl)C([H])=C([H])C=1C(=O)Cl	3.0045900000000003	7.324458999999999	3.135896	7.214857689999999	2.1902243199999996	3.0386097000000003
[H]C(=O)C1C([H])=C(C([H])=C([H])C=1C1C([H])=C(C(=O)Cl)C([H])=C([H])C=1C(=O)Cl)C1=C([H])C(C(=O)Cl)=C([H])C([H])=C1C(=O)Cl	2.87013	7.254389	3.104064	7.15109399	2.16093888	2.9270079000000004
[H]C1=C([H])C(C#N)=C([H])C(=C1F)C1C(I)=C(C([H])=C(C=1[N+](=O)[O-])C([H])([H])[H])C1=C([H])C(F)=C([H])C([H])=C1C#N	3.20296	7.00332	2.545348	6.9226212	1.64692016	3.2032568
[H]C1=C([H])C(C#N)=C([H])C(=C1F)C1C([H])=C(C(=C(C=1I)C1=C([H])C(F)=C([H])C([H])=C1C#N)[N+](=O)[O-])C([H])([H])[H]	3.1639500000000003	7.033987	2.495484	6.95052817	1.6010452799999997	3.1708785000000006
[H]C1=NC([H])=C([H])C2C1=C(C([H])=C([H])C=2C1C([H])=C([H])C(C(=O)N([H])[H])=C([H])C=1[H])C1C([H])=C([H])C([H])=C([H])C=1C(=O)N([H])[H]	3.18304	6.401719	1.815696	6.37516429	0.9756403200000001	3.1867232000000003
[H]C1=NC([H])=C([H])C2C1=C(C([H])=C([H])C=2C1C([H])=C([H])C([H])=C([H])C=1C(=O)N([H])[H])C1C([H])=C([H])C(C(=O)N([H])[H])=C([H])C=1[H]	3.17391	6.462871	1.848816	6.43081261	1.0061107199999997	3.1791453
[H]C1=NC(=C(C2=NC([H])=C(C(C3=NC(=C([H])C([H])=C3[H])N([H])[H])=C2[H])N([H])[H])C([H])=C1[H])N([H])[H]	3.0253400000000004	5.853262	1.45892	5.87606842	0.6474063999999995	3.0558322
[H]C1=NC(=C(C([H])=C1[H])C1=C([H])C(=NC([H])=C1N([H])[H])C1=NC(=C([H])C([H])=C1[H])N([H])[H])N([H])[H]	2.84357	5.720038	1.5610399999999998	5.75483458	0.7413567999999993	2.9049631000000002
[H]C1=C([H])C(C2=NC(C(=O)OC([H])([H])[H])=C(C3=C([H])C([H])=C(C(=C3[H])C([H])([H])[H])C([H])([H])[H])N2[H])=C(C(=C1[H])C([H])([H])[H])C([H])([H])[H]	3.3075400000000004	6.410182	1.4211080000000005	6.38286562	0.6126193600000001	3.2900582000000007
[H]C1=C([H])C(C2=C(N=C(C3=C([H])C([H])=C(C(=C3[H])C([H])([H])[H])C([H])([H])[H])N2[H])C(=O)OC([H])([H])[H])=C(C(=C1[H])C([H])([H])[H])C([H])([H])[H]	3.14237	6.368595	1.5772319999999995	6.34502145	0.7562534399999992	3.1529671
[H]C1=NN([H])C2C1=C([H])C(=C([H])C=2C1C([H])=C([H])C([H])=C2C(=O)C(=O)N([H])C=12)C1=C([H])C([H])=C2C(C(=O)C(=O)N2[H])=C1[H]	1.87081	6.289425	2.878112	6.27297675	1.95306304	2.0975723000000004
[H]C1=NN([H])C2C1=C([H])C(=C([H])C=2C1=C([H])C([H])=C2C(C(=O)C(=O)N2[H])=C1[H])C1C([H])=C([H])C([H])=C2C(=O)C(=O)N([H])C=12	1.88243	6.264036	2.876548	6.24987276	1.9516241599999997	2.1072169000000005
[H]C1=NC(=C(C([H])=C1[H])C1C([H])=C(C([H])=C2C=1N([H])C(=O)C2([H])[H])C1C([H])=NC(=C([H])C=1[H])[N+](=O)[O-])[N+](=O)[O-]	2.54394	6.639138000000001	2.701564	6.591215580000001	1.7906388799999995	2.6562702000000002
[H]C1=NC(=C(C([H])=C1[H])C1=C([H])C(C2C([H])=NC(=C([H])C=2[H])[N+](=O)[O-])=C2C(=C1[H])C([H])([H])C(=O)N2[H])[N+](=O)[O-]	2.39122	6.624851	2.75244	6.578214409999999	1.8374448	2.5295126000000003
[H]C(=O)C1=NC(=C([H])N=C1C1C([H])=C(C(=O)Cl)C([H])=C([H])C=1C(=O)Cl)C1=C([H])C(C(=O)Cl)=C([H])C([H])=C1C(=O)Cl	2.40616	7.395803	3.4557800000000003	7.279780730000001	2.4845176	2.5419128
[H]C(=O)C1=NC(=C([H])N=C1C1=C([H])C(C(=O)Cl)=C([H])C([H])=C1C(=O)Cl)C1C([H])=C(C(=O)Cl)C([H])=C([H])C=1C(=O)Cl	2.31486	7.4101810000000015	3.4479599999999997	7.292864710000002	2.4773232	2.4661338
[H]SC1=C([H])C([H])=C([H])C(=C1[H])C1=C2C([H])=NC(=C([H])C2=NN1[H])C1C([H])=C([H])C([H])=C([H])C=1S[H]	2.85934	5.9355259999999985	1.896196	5.950928659999999	1.0497003199999995	2.9180522
[H]SC1=C([H])C([H])=C([H])C(=C1[H])C1N=C([H])C2C(=NN([H])C=2C2C([H])=C([H])C([H])=C([H])C=2S[H])C=1[H]	2.97886	5.9013100000000005	1.870896	5.9197921000000004	1.0264243200000003	3.0172538
[H]C(=O)C1C(=NC([H])=C([H])C=1C1=NC([H])=C(C([H])=C1[H])[N+](=O)[O-])C1=C([H])C([H])=NC([H])=C1[N+](=O)[O-]	2.82365	7.39098	3.3266120000000003	7.2753917999999995	2.3656830400000004	2.8884295000000004
[H]C(=O)C1C(=NC([H])=C([H])C=1C1=C([H])C([H])=NC([H])=C1[N+](=O)[O-])C1=NC([H])=C(C([H])=C1[H])[N+](=O)[O-]	2.7381599999999997	7.3777849999999985	3.21106	7.263384349999999	2.2593752	2.8174728
[H]C1=C([H])C(C2=C([H])C(C3=C([H])C([H])=C(C(=C3[H])C([H])([H])[H])N([H])[H])=C(C(=C2[H])[N+](=O)[O-])C([H])([H])[H])=C(C(=C1[H])C([H])([H])[H])N([H])[H]	2.97222	6.002593	2.363464	6.01195963	1.4795868799999998	3.0117426000000003
[H]C1=C([H])C(C2C([H])=C(C([H])=C(C=2C([H])([H])[H])[N+](=O)[O-])C2=C([H])C([H])=C(C(=C2[H])C([H])([H])[H])N([H])[H])=C(C(=C1[H])C([H])([H])[H])N([H])[H]	3.02368	5.941168	2.344144	5.95606288	1.4618124799999999	3.0544544
[H]C1=C([H])C(C2C([H])=C(C(=C([H])C=2Cl)N([H])[H])C([H])([H])[H])=C(C(Cl)=C1C1C(Cl)=C([H])C([H])=C(C=1N([H])[H])C([H])([H])[H])C([H])([H])[H]	3.5723099999999994	6.190144	0.9483199999999998	6.18263104	0.17765439999999977	3.5098173
[H]C1=C([H])C(C2C(Cl)=C([H])C([H])=C(C=2N([H])[H])C([H])([H])[H])=C(C(Cl)=C1C1C([H])=C(C(=C([H])C=1Cl)N([H])[H])C([H])([H])[H])C([H])([H])[H]	3.5050800000000004	6.132177	0.9052639999999998	6.129881070000001	0.13804287999999953	3.4540164000000004
[H]C1N=C(C([H])=C(C=1[H])C1C([H])=C([H])C2=NC([H])=C([H])N2C=1[H])C1=C([H])N=C2C([H])=C([H])C([H])=C([H])N21	2.92657	6.00505	1.498296	6.0141955	0.6836323200000001	2.9738531000000004
[H]C1N=C(C([H])=C(C=1[H])C1=C([H])N=C2C([H])=C([H])C([H])=C([H])N21)C1C([H])=C([H])C2=NC([H])=C([H])N2C=1[H]	2.95894	5.8754659999999985	1.4349999999999996	5.896274059999999	0.6253999999999991	3.0007202
[H]C1=NC(=C([H])N=C1C1C([H])=C([H])C([H])=C(Cl)C=1F)C1C([H])=C([H])C([H])=C(F)C=1Cl	2.94234	6.774455000000001	2.592176	6.714354050000001	1.6900019199999998	2.9869422000000005
[H]C1=NC(=C([H])N=C1C1C([H])=C([H])C([H])=C(F)C=1Cl)C1C([H])=C([H])C([H])=C(Cl)C=1F	2.98716	6.786194	2.583712	6.72503654	1.68221504	3.0241428
[H]C1=NC2C(C([H])=C1[H])=C([H])C(OC([H])([H])[H])=C([H])C=2C1N=C(C2=NC([H])=C([H])N2C=1[H])C1C(OC([H])([H])[H])=C([H])C([H])=C2N=C([H])C([H])=C([H])C=12	2.76306	6.127262999999999	2.1174560000000002	6.125409329999999	1.2532595200000003	2.8381398
[H]C1=NC2C(C([H])=C1[H])=C([H])C(OC([H])([H])[H])=C([H])C=2C1=NC(C2C(OC([H])([H])[H])=C([H])C([H])=C3N=C([H])C([H])=C([H])C=23)=C([H])N2C1=NC([H])=C2[H]	2.7149199999999998	6.13336	2.089764	6.1309575999999995	1.2277828800000004	2.7981835999999998
[H]C1C([H])=C([H])C(=C(F)C=1[H])C1=C([H])C(=C(Cl)C(Cl)=C1N([H])[H])C1C([H])=C([H])C(F)=C([H])C=1[H]	3.25774	6.2245420000000005	1.2802559999999996	6.21393322	0.4830355199999996	3.2487242
[H]C1C([H])=C([H])C(=C(F)C=1[H])C1C([H])=C(C2C([H])=C([H])C(F)=C([H])C=2[H])C(=C(Cl)C=1Cl)N([H])[H]	3.2286900000000003	6.240194	1.3363760000000005	6.22817654	0.5346659200000001	3.2246127000000007
[H]C(=O)C1=C([H])N=C(C([H])=C1C1=C([H])C([H])=C(Cl)C(=C1[H])C([H])([H])C([H])([H])[H])C1C([H])=C([H])C([H])=C(C=1Cl)C([H])([H])C([H])([H])[H]	2.7921099999999996	6.915778	2.5638400000000003	6.84295798	1.6639328000000004	2.8622512999999996
[H]C(=O)C1=C([H])N=C(C([H])=C1C1C([H])=C([H])C([H])=C(C=1Cl)C([H])([H])C([H])([H])[H])C1=C([H])C([H])=C(Cl)C(=C1[H])C([H])([H])C([H])([H])[H]	2.78215	6.887841000000001	2.518024	6.81753531	1.62178208	2.8539845
[H]C1=NC(=C(F)C([H])=C1[H])C1C([H])=C([H])C(C(=O)N([H])[H])=C(C2=NC([H])=C(F)C([H])=C2[H])C=1[H]	3.52915	6.739966000000001	1.7268239999999997	6.682969060000001	0.8938780799999995	3.4739945
[H]C1=NC(=C(F)C([H])=C1[H])C1C([H])=C(C2=NC([H])=C(F)C([H])=C2[H])C([H])=C([H])C=1C(=O)N([H])[H]	3.48765	6.784828999999999	1.829772	6.723794389999999	0.9885902399999997	3.4395495
[H]C1N=C(C2C([H])=C([H])C(=C([H])C=2F)[N+](=O)[O-])C2C([H])=C([H])N([H])C=2C=1C1C(F)=C([H])C([H])=C([H])C=1[N+](=O)[O-]	2.7149199999999998	6.44003	2.617108	6.4100273	1.71293936	2.7981835999999998
[H]C1N=C(C2C([H])=C([H])N([H])C=2C=1C1C([H])=C([H])C(=C([H])C=1F)[N+](=O)[O-])C1C(F)=C([H])C([H])=C([H])C=1[N+](=O)[O-]	2.55722	6.414276999999999	2.766424	6.386592069999999	1.8503100799999999	2.6672926
[H]C1=C([H])C([H])=C(C(=S)N([H])C2C([H])=C(C([H])=C([H])C=2C2C([H])=C(C([H])=C([H])C=2N([H])[H])C([H])([H])[H])C2=C([H])C(=C([H])C([H])=C2C([H])([H])[H])N([H])[H])C([H])=C1[H]	2.2667200000000003	5.830785	2.096112	5.85561435	1.2336230400000003	2.4261776000000004
[H]C1=C([H])C([H])=C(C(=S)N([H])C2C([H])=C(C([H])=C([H])C=2C2=C([H])C(=C([H])C([H])=C2C([H])([H])[H])N([H])[H])C2C([H])=C(C([H])=C([H])C=2N([H])[H])C([H])([H])[H])C([H])=C1[H]	2.1804	5.878833	2.10154	5.89933803	1.2386168	2.3545320000000003
[H]C1C(=O)N(C([H])=C(C=1[H])C1C([H])=C([H])C(=C([H])C=1C(F)(F)F)C1C(=O)N(C([H])=C([H])C=1[H])C([H])([H])[H])C([H])([H])[H]	2.97969	6.124624000000002	1.568768	6.123007840000001	0.7484665599999998	3.0179427000000003
[H]C1C(=O)N(C([H])=C(C=1[H])C1C([H])=C([H])C(C2C(=O)N(C([H])=C([H])C=2[H])C([H])([H])[H])=C(C=1[H])C(F)(F)F)C([H])([H])[H]	2.90997	6.111611	1.6451279999999997	6.11116601	0.8187177599999993	2.9600751
[H]C1C([H])=C([H])C(C2=C([H])C(=C(F)C([H])=C2N([H])[H])C2C([H])=C([H])C(C(=O)C([H])([H])[H])=C([H])C=2[H])=C(C(=O)C([H])([H])[H])C=1[H]	3.1548199999999995	5.9812080000000005	1.682664	5.9924992800000005	0.85325088	3.1633005999999995
[H]C1C([H])=C([H])C(C2C([H])=C(C3C([H])=C([H])C(C(=O)C([H])([H])[H])=C([H])C=3[H])C(=C([H])C=2F)N([H])[H])=C(C(=O)C([H])([H])[H])C=1[H]	2.81286	6.0096	1.7492720000000002	6.018336	0.9145302400000004	2.8794738000000004
[H]C1N=C(F)C(C2=C(F)C(Cl)=C([H])C([H])=C2N([H])[H])=C(C=1C1C([H])=C(Cl)C(F)=C([H])C=1N([H])[H])C([H])([H])[H]	3.19881	6.336745	1.3433680000000001	6.31603795	0.54109856	3.1998123
[H]C1N=C(F)C(C2C([H])=C(Cl)C(F)=C(C3=C([H])N=C(F)C([H])=C3C([H])([H])[H])C=2N([H])[H])=C(C=1[H])C([H])([H])[H]	3.2519299999999998	6.357583999999999	1.4045479999999997	6.335001439999999	0.5973841599999998	3.2439019
[H]C1C([H])=C([H])C(=C(OC([H])([H])C2([H])OC([H])([H])C([H])([H])C([H])([H])C2([H])[H])C=1[H])C1C([H])=C2OC([H])([H])C([H])([H])C(=O)C2=C(C=1[H])C1C([H])=C([H])C(OC([H])([H])C2([H])OC([H])([H])C([H])([H])C([H])([H])C2([H])[H])=C([H])C=1[H]	2.8477200000000003	6.310992	2.008252	6.29260272	1.15279184	2.9084076000000003
[H]C1C([H])=C([H])C(=C(OC([H])([H])C2([H])OC([H])([H])C([H])([H])C([H])([H])C2([H])[H])C=1[H])C1C([H])=C(C([H])=C2OC([H])([H])C([H])([H])C(=O)C=12)C1C([H])=C([H])C(OC([H])([H])C2([H])OC([H])([H])C([H])([H])C([H])([H])C2([H])[H])=C([H])C=1[H]	2.95064	6.317271	1.970992	6.29831661	1.1185126399999996	2.9938312
[H]C1=C([H])C(C2=NC3=C(C(=C2[H])C2C([H])=C(F)C(C#N)=C([H])C=2[H])N([H])C([H])([H])C([H])([H])C3([H])[H])=C(C#N)C(F)=C1[H]	2.5539	6.059195	1.99022	6.06346745	1.1362024000000002	2.664537
[H]C1=C([H])C(=C(C#N)C(F)=C1[H])C1=C([H])C(=NC2=C1N([H])C([H])([H])C([H])([H])C2([H])[H])C1C([H])=C(F)C(C#N)=C([H])C=1[H]	2.79294	6.018063	1.9771560000000001	6.026037329999999	1.1241835199999999	2.8629402000000006
[H]C1N=C(C([H])=C(C=1C1C([H])=C([H])C(F)=C([H])C=1Cl)C([H])([H])[H])C1=C([H])C([H])=C(Cl)C([H])=C1F	3.73582	6.711392	1.7135759999999998	6.65696672	0.8816899199999995	3.6455306
[H]C1N=C(C([H])=C(C=1C1=C([H])C([H])=C(Cl)C([H])=C1F)C([H])([H])[H])C1C([H])=C([H])C(F)=C([H])C=1Cl	3.66195	6.717853	1.7481680000000002	6.6628462299999995	0.9135145600000003	3.5842185000000004
[H]C1=C(Cl)C(=C([H])C(OC([H])([H])[H])=C1C1C([H])=C(OC(F)(F)F)C(Cl)=C(C=1[H])C1C(OC([H])([H])[H])=C([H])C([H])=C(Cl)C=1N([H])[H])N([H])[H]	3.1880199999999994	6.315451	1.889848	6.29666041	1.0438601599999995	3.1908565999999996
[H]C1=C(Cl)C(=C([H])C(OC([H])([H])[H])=C1C1C([H])=C(C([H])=C(OC(F)(F)F)C=1Cl)C1C(OC([H])([H])[H])=C([H])C([H])=C(Cl)C=1N([H])[H])N([H])[H]	3.26023	6.208799	1.845136	6.19960709	1.00272512	3.2507909
[H]C1N=C(N=C(C=1[H])C1C([H])=C([H])C(=C(Cl)C=1Cl)N([H])[H])C1=C([H])C([H])=C(Cl)C(Cl)=C1N([H])[H]	2.86017	6.395258	1.997672	6.36928478	1.1430582399999993	2.9187411
[H]C1N=C(N=C(C=1[H])C1=C([H])C([H])=C(Cl)C(Cl)=C1N([H])[H])C1C([H])=C([H])C(=C(Cl)C=1Cl)N([H])[H]	2.80124	6.372599	2.0008	6.34866509	1.1459359999999998	2.8698292
[H]C1=NC(=C(C2=NC([H])=C(C3=NC(=C([H])C([H])=C3[H])C([H])([H])[H])C(=C2[N+](=O)[O-])C([H])([H])[H])C([H])=C1[H])C([H])([H])[H]	3.3606599999999998	7.048547	2.2837	6.96377777	1.4062039999999998	3.3341478
[H]C1=NC(=C(C([H])=C1[H])C1=C([H])N=C(C2=NC(=C([H])C([H])=C2[H])C([H])([H])[H])C(=C1C([H])([H])[H])[N+](=O)[O-])C([H])([H])[H]	3.0851	7.0718429999999985	2.612232	6.984977129999999	1.70845344	3.1054330000000006
[H]C1=NC(=C(OC([H])([H])C([H])([H])[H])C([H])=C1N([H])[H])C1=C([H])C(=C(C2=NC([H])=C(OC([H])([H])C([H])([H])[H])C([H])=C2N([H])[H])C(=C1[H])C([H])([H])[H])[N+](=O)[O-]	2.61615	6.036445	2.424368	6.04276495	1.5356185599999996	2.7162045000000004
[H]C1=NC(=C(OC([H])([H])C([H])([H])[H])C([H])=C1N([H])[H])C1=C(C([H])=C(C2=NC([H])=C(OC([H])([H])C([H])([H])[H])C([H])=C2N([H])[H])C([H])=C1C([H])([H])[H])[N+](=O)[O-]	2.6070199999999994	6.147283	2.494196	6.14362753	1.59986032	2.7086265999999997
[H]C1=C([H])C(=C([H])C(OC([H])([H])[H])=C1C1C([H])=C(OC(F)(F)F)C(N=C=S)=C(C=1[H])C1=C([H])C([H])=C(OC([H])([H])[H])C([H])=C1C([H])([H])[H])C([H])([H])[H]	3.3332699999999997	6.277777	1.995464	6.26237707	1.14102688	3.3114141
[H]C1=C([H])C(=C([H])C(OC([H])([H])[H])=C1C1C([H])=C(C([H])=C(OC(F)(F)F)C=1N=C=S)C1=C([H])C([H])=C(OC([H])([H])[H])C([H])=C1C([H])([H])[H])C([H])([H])[H]	3.3996699999999995	6.226999	1.97182	6.21616909	1.1192744000000001	3.3665260999999997
[H]C1=NC([H])=C(C2C([H])=C(F)C(Cl)=C(C3=NC([H])=C([H])C(=C3N([H])[H])N([H])[H])C=2[H])C(=C1N([H])[H])N([H])[H]	3.0552200000000003	6.0628350000000015	1.5205599999999997	6.066779850000001	0.7041151999999995	3.0806326000000004
[H]C1=NC([H])=C(C2C([H])=C(C3=NC([H])=C([H])C(=C3N([H])[H])N([H])[H])C([H])=C(F)C=2Cl)C(=C1N([H])[H])N([H])[H]	3.03364	6.0585580000000006	1.3786040000000002	6.0628877800000005	0.5735156799999999	3.0627212000000004
[H]C1N=C(C([H])=C(C=1C1=C([H])C([H])=C(C(=C1C([H])([H])[H])C([H])([H])[H])N([H])[H])C([H])([H])[H])C1C([H])=C([H])C(=C(C=1N([H])[H])C([H])([H])[H])C([H])([H])[H]	3.2934300000000003	5.786013	1.1045359999999995	5.8148718299999995	0.3213731199999996	3.2783469000000003
[H]C1N=C(C([H])=C(C=1C1C([H])=C([H])C(=C(C=1N([H])[H])C([H])([H])[H])C([H])([H])[H])C([H])([H])[H])C1=C([H])C([H])=C(C(=C1C([H])([H])[H])C([H])([H])[H])N([H])[H]	3.11	5.850714	1.091012	5.87374974	0.30893104000000005	3.1261
[H]C1N=C2C(=NC(C3C([H])=C([H])C([H])=C4C(=O)C(=O)N(C=34)C([H])([H])C([H])([H])[H])=C([H])N2C=1Cl)C1=C([H])C([H])=C2C(C(=O)C(=O)N2C([H])([H])C([H])([H])[H])=C1[H]	1.8052400000000002	6.532122	3.06018	6.49383102	2.1205656	2.0431492000000007
[H]C1N=C2C(=NC(C3=C([H])C([H])=C4C(C(=O)C(=O)N4C([H])([H])C([H])([H])[H])=C3[H])=C([H])N2C=1Cl)C1C([H])=C([H])C([H])=C2C(=O)C(=O)N(C=12)C([H])([H])C([H])([H])[H]	1.82682	6.596367999999999	3.091828	6.55229488	2.14968176	2.0610606000000002
[H]C(=O)C1SC(=NC=1[H])C1=NC([H])=C(C2N=C([H])SC=2C([H])=O)N1[H]	2.6070199999999994	6.4021740000000005	2.83984	6.375578340000001	1.9178528000000004	2.7086265999999997
[H]C(=O)C1SC(=NC=1[H])C1=C([H])N=C(C2N=C([H])SC=2C([H])=O)N1[H]	2.45181	6.4241959999999985	2.982072	6.3956183599999985	2.04870624	2.5798023000000003
[H]C1=C([H])C(=C(Cl)C(=C1[H])C([H])([H])[H])C1C2=NSN=C2C(=C([H])C=1F)C1=C([H])C([H])=C(Cl)C(=C1[H])C([H])([H])[H]	2.83278	6.5591490000000015	3.117496	6.518425590000001	2.17329632	2.8960074000000002
[H]C1=C([H])C(=C(Cl)C(=C1[H])C([H])([H])[H])C1C2=NSN=C2C(=C(F)C=1[H])C1=C([H])C([H])=C(Cl)C(=C1[H])C([H])([H])[H]	2.83112	6.542587	3.1232	6.50335417	2.178544	2.8946296
[H]C1=C([H])C(C2C([H])=C(C([H])=C(C#N)C=2F)C2=C([H])C([H])=C(C(=C2[H])[N+]([O-])=NC(C([H])([H])[H])(C([H])([H])[H])C([H])([H])[H])N([H])[H])=C(C(=C1[H])[N+]([O-])=NC(C([H])([H])[H])(C([H])([H])[H])C([H])([H])[H])N([H])[H]	2.5754799999999998	6.318272	2.131164	6.2992275200000005	1.2658708799999996	2.6824484
[H]C1=C([H])C(C2C([H])=C(C#N)C(F)=C(C=2[H])C2=C([H])C([H])=C(C(=C2[H])[N+]([O-])=NC(C([H])([H])[H])(C([H])([H])[H])C([H])([H])[H])N([H])[H])=C(C(=C1[H])[N+]([O-])=NC(C([H])([H])[H])(C([H])([H])[H])C([H])([H])[H])N([H])[H]	2.60619	6.257484	2.1429400000000003	6.24391044	1.2767048	2.7079377
[H]C1N=C(C(C#N)=C(C=1[H])C1=C([H])C(Cl)=C([H])C([H])=C1C([H])([H])[H])C1C([H])=C(C([H])=C([H])C=1Cl)C([H])([H])[H]	3.50923	7.016514999999999	2.158856	6.934628649999999	1.2913475200000004	3.4574609
[H]C1N=C(C(C#N)=C(C=1[H])C1C([H])=C(C([H])=C([H])C=1Cl)C([H])([H])[H])C1=C([H])C(Cl)=C([H])C([H])=C1C([H])([H])[H]	3.63207	6.986758	2.089396	6.90754978	1.22744432	3.5594181000000003
[H]C1=NC2=NN([H])C(C3C([H])=C(C([H])=C(F)C=3F)C3C([H])=NC4=NN([H])C([H])=C4C=3[H])=C2C([H])=C1[H]	2.9191	6.364136	2.0134040000000004	6.34096376	1.15753168	2.9676530000000003
[H]C1=NC2=NN([H])C(C3C([H])=C(F)C(F)=C(C=3[H])C3C([H])=NC4=NN([H])C([H])=C4C=3[H])=C2C([H])=C1[H]	2.86266	6.396168	2.0238	6.370112880000001	1.167096	2.9208078000000004
[H]C1N=C(C([H])=C(C=1[H])C1C([H])=C(C([H])=C(OC(F)(F)F)C=1N=C=S)C1N=C(C([H])=C([H])C=1[H])C([H])([H])[H])C([H])([H])[H]	3.1888499999999995	6.627489999999999	2.221232	6.5806159	1.3487334400000002	3.1915454999999997
[H]C1N=C(C([H])=C(C=1[H])C1C([H])=C(OC(F)(F)F)C(N=C=S)=C(C=1[H])C1N=C(C([H])=C([H])C=1[H])C([H])([H])[H])C([H])([H])[H]	3.19632	6.539948000000001	2.242944	6.500952680000001	1.3687084799999996	3.1977456
[H]C1N=C(C([H])=C(C2C([H])=C(C(=C([H])C=2F)C2N=C(C([H])=C([H])C=2N([H])[H])C([H])([H])[H])N([H])[H])C=1N([H])[H])C([H])([H])[H]	3.06601	5.943352	1.403352	5.95805032	0.5962838399999999	3.0895883
[H]C1N=C(C([H])=C(C2=C([H])C(F)=C(C([H])=C2N([H])[H])C2N=C(C([H])=C([H])C=2N([H])[H])C([H])([H])[H])C=1N([H])[H])C([H])([H])[H]	2.84025	5.798207	1.4415319999999996	5.82596837	0.6314094399999997	2.9022075000000003
[H]C1=NC([H])=C(C(=N1)C([H])([H])[H])C1=C([H])C(=NC(C2=NC([H])=C([H])C(=N2)C([H])([H])[H])=C1N([H])[H])C([H])([H])[H]	2.59789	6.119073	2.1667680000000002	6.1179564300000004	1.2986265599999998	2.7010487000000003
[H]C1=NC([H])=C(C(=N1)C([H])([H])[H])C1N=C(C([H])=C(C2=NC([H])=C([H])C(=N2)C([H])([H])[H])C=1N([H])[H])C([H])([H])[H]	2.71907	6.128446	1.951396	6.126485860000001	1.1004843199999996	2.8016281000000003
[H]C1=C([H])C(=C(Cl)C(=C1[H])C([H])([H])[H])C1C(F)=C([H])C(=C([H])C=1Cl)C1C([H])=C([H])C([H])=C(Cl)C=1C([H])([H])[H]	3.75574	6.918872	1.3590999999999998	6.84577352	0.5555719999999997	3.6620642
[H]C1=C([H])C(=C(Cl)C(=C1[H])C([H])([H])[H])C1C([H])=C(F)C(=C(Cl)C=1[H])C1C([H])=C([H])C([H])=C(Cl)C=1C([H])([H])[H]	3.9366800000000004	6.944625	1.317056	6.86920875	0.5168915199999997	3.8122444000000004
[H]C1N=C(C2C([H])=C([H])C([H])=C(C=2[H])C([H])([H])C#N)C(=C(C=1[H])C1C([H])=C([H])C([H])=C([H])C=1C([H])([H])C#N)C([H])([H])[H]	3.82712	6.829146000000001	1.3623200000000004	6.7641228600000005	0.5585344000000001	3.7213096
[H]C1=NC([H])=C([H])C(C2C([H])=C([H])C(C3=NC([H])=C([H])C([H])=C3C([H])([H])[H])=C(C=2[H])C([H])([H])C#N)=C1C([H])([H])[H]	3.7906	6.7710880000000015	1.2269880000000004	6.711290080000001	0.43402896	3.690998
[H]C(=O)C1=C([H])C([H])=C(C([H])=C1F)C1N=C(C(Cl)=NC=1[H])C1C([H])=C([H])C([H])=C(F)C=1C([H])=O	2.58876	7.045453	2.745264	6.96096223	1.83084288	2.6934708
[H]C(=O)C1=C([H])C([H])=C(C2=NC(=C([H])N=C2Cl)C2C([H])=C([H])C([H])=C(F)C=2C([H])=O)C([H])=C1F	2.8859	7.1474639999999985	2.8748	7.053792239999998	1.9500159999999997	2.940097
[H]C1N=C(C([H])=C(C=1[H])C1C([H])=C(OC(F)(F)F)C(N=C=S)=C(C=1[H])C1N=C(C([H])=C([H])C=1[H])N([H])[H])N([H])[H]	3.1166400000000003	6.1845930000000005	2.1107400000000003	6.17757963	1.2470808	3.1316112000000005
[H]C1N=C(C([H])=C(C=1[H])C1C([H])=C(C([H])=C(OC(F)(F)F)C=1N=C=S)C1N=C(C([H])=C([H])C=1[H])N([H])[H])N([H])[H]	3.1373900000000003	6.293975	2.122148	6.27711725	1.2575761600000002	3.1488337000000004
[H]C1C(=NC(=C(C=1[H])C1C([H])=C(C([H])=C([H])C=1C(F)(F)F)C1C(=NC(=C([H])C=1[H])N([H])[H])C([H])([H])[H])N([H])[H])C([H])([H])[H]	3.17225	6.165483	1.5459519999999998	6.16018953	0.7274758399999994	3.1777675
[H]C1C(=NC(=C(C=1[H])C1C([H])=C([H])C(=C(C=1[H])C1C(=NC(=C([H])C=1[H])N([H])[H])C([H])([H])[H])C(F)(F)F)N([H])[H])C([H])([H])[H]	3.37892	6.14246	1.431504	6.1392386	0.62218368	3.3493036
[H]C1=C([H])C(=C(F)C(Cl)=C1[H])C1C([H])=C([H])C(=C(OC([H])(F)F)C=1[H])C1C([H])=C([H])C([H])=C(F)C=1Cl	3.53413	6.622121000000001	1.7293079999999996	6.57573011	0.8961633599999992	3.4781279000000005
[H]C1=C([H])C(=C(F)C(Cl)=C1[H])C1C([H])=C([H])C(=C([H])C=1OC([H])(F)F)C1C([H])=C([H])C([H])=C(F)C=1Cl	3.5656699999999995	6.650513	1.6772359999999995	6.60156683	0.8482571199999995	3.5043060999999995
[H]C1C([H])=C([H])C(=C(OC([H])(F)F)C=1[H])C1=C(C([H])=C(C(C2C([H])=C([H])C([H])=C(OC([H])(F)F)C=2[H])=C1C([H])([H])[H])C([H])([H])[H])N([H])[H]	3.3722800000000004	5.915324	1.237476	5.93254484	0.44367791999999984	3.3437924000000003
[H]C1C([H])=C([H])C(=C(OC([H])(F)F)C=1[H])C1C(=C([H])C(=C(C2C([H])=C([H])C([H])=C(OC([H])(F)F)C=2[H])C=1C([H])([H])[H])N([H])[H])C([H])([H])[H]	3.4461500000000003	5.955091	1.265352	5.9687328100000006	0.4693238399999995	3.4051045
[H]C1=NC2=C([H])C(=C([H])C([H])=C2C([H])=C1[H])C1C(Cl)=C(C([H])=C(OC([H])([H])[H])C=1N([H])[H])C1C([H])=C([H])C([H])=C2N=C([H])C([H])=C([H])C=12	3.1838699999999998	5.920693	1.832072	5.93743063	0.9907062399999997	3.1874121
[H]C1=NC2=C([H])C(=C([H])C([H])=C2C([H])=C1[H])C1C([H])=C(OC([H])([H])[H])C(=C(C=1Cl)C1C([H])=C([H])C([H])=C2N=C([H])C([H])=C([H])C=12)N([H])[H]	3.1954899999999995	5.919419	1.840444	5.9362712900000005	0.9984084799999993	3.1970566999999996
[H]C1=NN2C(=N1)C(=NC([H])=C2[H])C1C([H])=C(C([H])=C(OC(F)(F)F)C=1N([H])[H])C1N=C([H])C2=NC([H])=NN2C=1[H]	2.89171	6.178223	2.1105560000000003	6.17178293	1.2469115200000003	2.9449193
[H]C1=NN2C(=N1)C(=NC([H])=C2[H])C1C([H])=C(OC(F)(F)F)C(=C(C=1[H])C1N=C([H])C2=NC([H])=NN2C=1[H])N([H])[H]	2.51074	6.057375	2.114236	6.06181125	1.25029712	2.6287142
[H]C(=O)C1=C([H])C(=NC([H])=C1C1C([H])=C2SC(Cl)=NC2=C([H])C=1[H])C1C([H])=C([H])C([H])=C2SC(Cl)=NC=12	2.85602	6.6718980000000006	2.617844	6.6210271800000005	1.7136164799999998	2.9152966000000005
[H]C(=O)C1=C([H])C(=NC([H])=C1C1C([H])=C([H])C([H])=C2SC(Cl)=NC=12)C1C([H])=C2SC(Cl)=NC2=C([H])C=1[H]	2.60204	6.672352999999998	2.668996	6.6214412299999985	1.76067632	2.7044932000000004
[H]C1=NC2C(=NC([H])=C([H])C=2C2C3=NSN=C3C([H])=C3C([H])=C([H])C([H])=C([H])C=23)C([H])=C1C1C2=NSN=C2C([H])=C2C([H])=C([H])C([H])=C([H])C=12	2.07582	6.119983	3.338572	6.11878453	2.3766862399999997	2.2677306
[H]C1=NC2C(=NC([H])=C([H])C=2C2C3=NSN=C3C([H])=C3C([H])=C([H])C([H])=C([H])C=23)C([H])=C1C1C2=NSN=C2C([H])=C2C([H])=C([H])C([H])=C([H])C=12	2.10653	6.122895	3.3449199999999997	6.12143445	2.3825263999999997	2.2932199
[H]C1=NC([H])=C(C([H])=N1)C1N=C(C2N=C([H])C([H])=C([H])N=2)C2=NC([H])=NN2C=1[H]	2.92076	6.974746000000001	2.66964	6.89661886	1.7612687999999999	2.9690308
[H]C1=NC([H])=C(C([H])=N1)C1=NC(C2N=C([H])C([H])=C([H])N=2)=C([H])N2N=C([H])N=C12	2.92076	6.9279720000000005	2.682152	6.85405452	1.77277984	2.9690308
[H]C1=C(Cl)C(=C([H])C(=C1C1C(F)=C(C([H])=C(C=1N([H])[H])C([H])([H])[H])C1C(=C([H])C([H])=C(Cl)C=1C([H])([H])[H])N([H])[H])N([H])[H])C([H])([H])[H]	3.2901099999999994	5.8916640000000005	1.216132	5.91101424	0.4240414399999999	3.2755912999999994
[H]C1=C(Cl)C(=C([H])C(=C1C1C([H])=C(C(=C(C=1F)C1C(=C([H])C([H])=C(Cl)C=1C([H])([H])[H])N([H])[H])N([H])[H])C([H])([H])[H])N([H])[H])C([H])([H])[H]	3.26106	5.939439	1.2258839999999998	5.95448949	0.43301327999999994	3.2514798000000003
[H]C(=O)C1=NC(=C([H])N=C1C1=NC([H])=C(Cl)C([H])=C1[H])C1=C([H])C([H])=NC([H])=C1Cl	2.2982599999999995	7.08431	2.9641319999999998	6.9963221	2.0322014399999997	2.4523558
[H]C(=O)C1=NC(C2=NC([H])=C(Cl)C([H])=C2[H])=C([H])N=C1C1=C([H])C([H])=NC([H])=C1Cl	2.43272	7.096049000000002	2.992468	7.007004590000001	2.05827056	2.5639576
[H]SC1C([H])=C([H])C(C2=NC([H])=C(N=C2Cl)N([H])[H])=C([H])C=1C1N=C([H])C(Cl)=NC=1N([H])[H]	3.08427	6.014514	1.942564	6.02280774	1.09235888	3.1047441000000005
[H]SC1C([H])=C([H])C(=C([H])C=1C1=NC([H])=C(N=C1Cl)N([H])[H])C1N=C([H])C(Cl)=NC=1N([H])[H]	2.9971200000000002	5.994403	1.9341920000000004	6.00450673	1.0846566400000004	3.0324096000000003
[H]C1=NC(C2=NC([H])=C(C3=C4C(=NN3[H])C([H])=NC([H])=C4[H])C3=C2C([H])=C([H])N3[H])=C([H])C2C1=NN([H])C=2[H]	2.44517	5.741423	2.152876	5.77429493	1.2858459199999999	2.5742911
[H]C1=NC(=C([H])C2C1=NN([H])C=2[H])C1=C([H])N=C(C2C([H])=C([H])N([H])C=21)C1=C2C(=NN1[H])C([H])=NC([H])=C2[H]	2.51572	5.7558919999999985	2.029412	5.787461719999999	1.1722590400000001	2.6328476
[H]C1C([H])=C([H])C(=C(C=1[H])C1=C([H])C(C2C([H])=C([H])C(=C([H])C=2[H])[N+](=O)[O-])=C2C(=C1[H])C(C(=O)N2[H])(C([H])([H])[H])C([H])([H])[H])[N+](=O)[O-]	2.6618	6.528846	2.569452	6.49084986	1.6690958399999998	2.7540940000000003
[H]C1C([H])=C([H])C(=C(C=1[H])C1C([H])=C(C([H])=C2C=1N([H])C(=O)C2(C([H])([H])[H])C([H])([H])[H])C1C([H])=C([H])C(=C([H])C=1[H])[N+](=O)[O-])[N+](=O)[O-]	2.83278	6.587267999999999	2.512412	6.54401388	1.6166190399999998	2.8960074000000002
[H]C1=C([H])C(C2C([H])=C([H])C(N=C=S)=C(C=2[H])C2=C([H])C([H])=C(C(=C2[H])[N+]([O-])=NC(C([H])([H])[H])(C([H])([H])[H])C([H])([H])[H])N([H])[H])=C(C(=C1[H])[N+]([O-])=NC(C([H])([H])[H])(C([H])([H])[H])C([H])([H])[H])N([H])[H]	2.51821	6.132358999999999	2.1469880000000003	6.1300466899999995	1.28042896	2.6349143
[H]C1=C([H])C(C2C([H])=C(C([H])=C([H])C=2N=C=S)C2=C([H])C([H])=C(C(=C2[H])[N+]([O-])=NC(C([H])([H])[H])(C([H])([H])[H])C([H])([H])[H])N([H])[H])=C(C(=C1[H])[N+]([O-])=NC(C([H])([H])[H])(C([H])([H])[H])C([H])([H])[H])N([H])[H]	2.7033	6.085039	2.135028	6.08698549	1.2694257599999998	2.788539
[H]C1=NC(C2C([H])=C(C3=NC([H])=C(N=C3Cl)N([H])[H])C([H])=C([H])C=2C(=O)N([H])[H])=C(N=C1Cl)N([H])[H]	3.07514	6.4970870000000005	2.125	6.4619491700000005	1.2602000000000002	3.0971662
[H]C1C([H])=C([H])C(C2=NC(C3C([H])=C([H])C(C(=O)N([H])[H])=C([H])C=3[H])=C(N=C2Cl)N([H])[H])=C(C(=O)N([H])[H])C=1[H]	3.1465199999999998	6.495267	1.9915080000000003	6.46029297	1.13738736	3.1564116
[H]C1=NC(=C([H])C2=NN([H])C([H])=C12)C1C([H])=C(C([H])=C([H])C=1N([H])[H])C1=C2C([H])=NC([H])=C([H])C2=NN1[H]	2.9531300000000003	5.7610790000000005	1.597012	5.79218189	0.7744510399999998	2.9958979
[H]C1=NC(=C([H])C2=NN([H])C([H])=C12)C1C([H])=C([H])C(=C(C=1[H])C1=C2C([H])=NC([H])=C([H])C2=NN1[H])N([H])[H]	2.96143	5.679179	1.5393279999999998	5.71765289	0.7213817599999999	3.0027869000000003
[H]C1N=C2C(=C([H])C(=C([H])N2C=1C1C([H])=C2C(=O)C(=O)N([H])C2=C([H])C=1[H])C([H])([H])[H])C1C([H])=C([H])C([H])=C2C(=O)C(=O)N([H])C=12	1.8185200000000001	6.022704	2.8591599999999997	6.03026064	1.9356271999999999	2.0541716000000005
[H]C1N=C2C(=C([H])C(=C([H])N2C=1C1C([H])=C([H])C([H])=C2C(=O)C(=O)N([H])C=12)C([H])([H])[H])C1=C([H])C([H])=C2C(C(=O)C(=O)N2[H])=C1[H]	1.7562700000000002	6.0086900000000005	2.847568	6.0175079	1.92496256	2.0025041000000003
[H]C1N=C2C(=NC=1[H])N([H])C([H])=C2C1C([H])=C(OC([H])([H])[H])C(=C(C=1[H])C1N=C2C(=NC=1[H])N([H])C([H])=C2[H])N([H])[H]	2.63524	5.572072	1.7586559999999998	5.620185520000001	0.9231635199999992	2.7320492000000005
[H]C1N=C2C(=NC=1[H])N([H])C([H])=C2C1C([H])=C(C([H])=C(OC([H])([H])[H])C=1N([H])[H])C1N=C2C(=NC=1[H])N([H])C([H])=C2[H]	2.9274	5.503731	1.7623359999999997	5.55799521	0.9265491199999998	2.9745420000000005
[H]C1=NC([H])=C([H])C(C2=C([H])C(=NC(C3=NC([H])=C([H])C([H])=C3C([H])([H])[H])=C2N([H])[H])C(F)(F)F)=C1C([H])([H])[H]	2.8178400000000003	6.545317000000002	1.997488	6.505838470000001	1.1428889599999996	2.8836072
[H]C1=NC([H])=C([H])C(C2N=C(C([H])=C(C3=NC([H])=C([H])C([H])=C3C([H])([H])[H])C=2N([H])[H])C(F)(F)F)=C1C([H])([H])[H]	2.71741	6.501455	1.9729240000000001	6.46592405	1.1202900800000002	2.8002503
[H]C1SC(C2N=C(C3SC([H])=C(C=3[H])C([H])([H])C([H])([H])C([H])([H])C([H])([H])[H])C3=C([H])C([H])=C([H])C([H])=C3C=2[H])=C(C=1[H])C([H])([H])C([H])([H])C([H])([H])C([H])([H])[H]	2.71824	5.807580000000001	1.9278439999999997	5.8344978	1.0788164799999995	2.8009392
[H]C1SC(C2=NC(=C([H])C3=C([H])C([H])=C([H])C([H])=C23)C2SC([H])=C(C=2[H])C([H])([H])C([H])([H])C([H])([H])C([H])([H])[H])=C(C=1[H])C([H])([H])C([H])([H])C([H])([H])C([H])([H])[H]	2.71741	5.759896	1.995372	5.79110536	1.1409422399999993	2.8002503
[H]C1=NC(C2=C([H])N=C(C3=NC([H])=C(N3[H])C(F)(F)F)C([H])=C2N([H])[H])=C(N1[H])C(F)(F)F	2.99795	6.169669000000002	1.5402479999999996	6.163998790000002	0.7222281599999993	3.0330985000000004
[H]C1=NC(C2=NC([H])=C(C3=NC([H])=C(N3[H])C(F)(F)F)C(=C2[H])N([H])[H])=C(N1[H])C(F)(F)F	2.95562	6.0903170000000015	1.594896	6.091788470000001	0.7725043200000004	2.9979646000000004
[H]C1=C([H])C(F)=C(C2=NN=C(C(=C2[H])C2=C([H])C(F)=C([H])C([H])=C2F)N([H])[H])C([H])=C1F	2.8883900000000002	6.433296	2.041188	6.4038993600000005	1.1830929599999997	2.9421637
[H]C1=C([H])C(F)=C(C([H])=C1F)C1C(=NN=C(C=1[H])C1=C([H])C(F)=C([H])C([H])=C1F)N([H])[H]	2.85685	6.4308390000000015	2.05692	6.401663490000002	1.1975663999999995	2.9159855000000006
[H]C1=C(F)C(=C([H])C(=C1C1=C([H])C(=C(C([H])=C1C([H])([H])[H])C1C(=C([H])C([H])=C(F)C=1C([H])([H])[H])N([H])[H])[N+](=O)[O-])N([H])[H])C([H])([H])[H]	2.39205	6.268586	2.459236	6.25401326	1.56769712	2.5302015
[H]C1=C(F)C(=C([H])C(=C1C1C([H])=C(C(=C([H])C=1[N+](=O)[O-])C1C(=C([H])C([H])=C(F)C=1C([H])([H])[H])N([H])[H])C([H])([H])[H])N([H])[H])C([H])([H])[H]	2.44185	6.298433999999999	2.505052	6.28117494	1.60984784	2.5715355000000004
[H]C1=NC(Cl)=C(C([H])=C1[H])C1C([H])=C(F)C(C2=NC(Cl)=C([H])C([H])=C2[H])=C([H])C=1F	3.23367	6.780461000000002	2.182408	6.7198195100000016	1.3130153599999996	3.2287461000000004
[H]C1=NC(Cl)=C(C([H])=C1[H])C1=C([H])C(F)=C(C2=NC(Cl)=C([H])C([H])=C2[H])C([H])=C1F	3.31086	6.768813000000001	2.193816	6.70921983	1.3235107199999998	3.2928138000000002
[H]C1=NN2C(=NC([H])=C2[H])C(C2=NC([H])=C(C3=NN4C(=NC([H])=C4[H])C([H])=C3[H])C([H])=C2C#N)=C1[H]	2.58544	6.713758	2.884828	6.65911978	1.9592417600000003	2.6907152000000005
[H]C1=NN2C(=NC([H])=C2[H])C(=C1[H])C1=C([H])N=C(C2=NN3C(=NC([H])=C3[H])C([H])=C2[H])C(C#N)=C1[H]	2.60453	6.7123930000000005	2.8115040000000002	6.657877630000001	1.89178368	2.7065599000000002
[H]C1N=C(C2C([H])=C([H])C(=C([H])C=2OC([H])([H])[H])C([H])([H])[H])C(=C(C=1C1=C([H])C([H])=C(OC([H])([H])[H])C([H])=C1C([H])([H])[H])C([H])([H])[H])[N+](=O)[O-]	2.8742799999999997	6.5064600000000015	2.578652	6.470478600000002	1.6775598399999998	2.9304524
[H]C1N=C(C2=C([H])C([H])=C(OC([H])([H])[H])C([H])=C2C([H])([H])[H])C(=C(C=1C1C([H])=C([H])C(=C([H])C=1OC([H])([H])[H])C([H])([H])[H])C([H])([H])[H])[N+](=O)[O-]	2.7995799999999997	6.511374	2.595488	6.4749503399999995	1.6930489599999996	2.8684513999999997
[H]C(=O)C1=C([H])N=C(C([H])=C1C1N=C(C([H])=C([H])C=1N([H])[H])C([H])([H])[H])C1=C([H])C(=NC([H])=C1N([H])[H])C([H])([H])[H]	2.43936	6.336745	2.593832	6.31603795	1.69152544	2.5694688
[H]C(=O)C1=C([H])N=C(C([H])=C1C1=C([H])C(=NC([H])=C1N([H])[H])C([H])([H])[H])C1N=C(C([H])=C([H])C=1N([H])[H])C([H])([H])[H]	2.7605699999999995	6.488533	2.550684	6.45416503	1.6518292799999998	2.8360730999999997
[H]C1N=C(C([H])=C(C=1[H])C1=C([H])C(=C([H])C([H])=C1C([H])([H])[H])C([H])([H])[H])C1C([H])=C(C([H])=C([H])C=1C([H])([H])[H])C([H])([H])[H]	3.6412	6.508462000000001	1.3759359999999994	6.472300420000001	0.5710611199999995	3.566996
[H]C1N=C(C([H])=C(C=1[H])C1C([H])=C(C([H])=C([H])C=1C([H])([H])[H])C([H])([H])[H])C1=C([H])C(=C([H])C([H])=C1C([H])([H])[H])C([H])([H])[H]	3.6021900000000002	6.515014	1.393876	6.47826274	0.5875659199999994	3.5346177
[H]C1=NC(OC([H])([H])[H])=C(C([H])=C1[H])C1C([H])=NC2C(=NC([H])=C([H])C=2C2C([H])=NC(OC([H])([H])[H])=C([H])C=2[H])C=1[H]	2.90499	6.524296	2.255824	6.48670936	1.3805580800000001	2.9559417000000003
[H]C1=NC(OC([H])([H])[H])=C(C([H])=C1[H])C1C([H])=C([H])N=C2C([H])=C(C([H])=NC=12)C1C([H])=NC(OC([H])([H])[H])=C([H])C=1[H]	2.87511	6.512739	2.3063320000000003	6.47619249	1.4270254400000004	2.9311413
[H]C1=NC([H])=C2C(C3=C([H])N=C(C4=NC([H])=C5C([H])=C([H])N([H])C5=C4[H])C([H])=C3C([H])([H])[H])=C([H])N([H])C2=C1[H]	3.1747400000000003	5.779279	1.334168	5.80874389	0.53263456	3.1798342
[H]C1=NC([H])=C2C(C3=NC([H])=C(C4=NC([H])=C5C([H])=C([H])N([H])C5=C4[H])C(=C3[H])C([H])([H])[H])=C([H])N([H])C2=C1[H]	3.13407	5.832877999999999	1.377224	5.857518979999999	0.5722460800000002	3.1460781
[H]C1=NC2C(=NC([H])=C([H])C=2C2=NC(C3C([H])=NC4C(=NC([H])=C([H])C=4[H])C=3[H])=C(N2[H])C(F)(F)F)C([H])=C1[H]	2.84523	6.688186999999999	2.371928	6.635850169999999	1.4873737599999997	2.9063409
[H]C1=NC2C(=NC([H])=C([H])C=2C2N=C(C3C([H])=NC4C(=NC([H])=C([H])C=4[H])C=3[H])N([H])C=2C(F)(F)F)C([H])=C1[H]	2.73152	6.6862759999999986	2.5234520000000003	6.634111159999999	1.62677584	2.8119616
[H]C1=NN2C(=N1)C([H])=C([H])C([H])=C2C1C([H])=C(C(C2=NN3C(=N2)C([H])=C([H])C([H])=C3[H])=C([H])C=1[N+](=O)[O-])N([H])[H]	2.91412	6.4415770000000006	2.2886680000000004	6.4114350700000005	1.4107745600000001	2.9635196
[H]C1=NN2C(=N1)C([H])=C([H])C([H])=C2C1=C([H])C(=C(C2=NN3C(=N2)C([H])=C([H])C([H])=C3[H])C([H])=C1N([H])[H])[N+](=O)[O-]	2.72405	6.359222	2.282412	6.33649202	1.40501904	2.8057615
[H]C1N=C(C2=C([H])C([H])=C(OC([H])([H])[H])C([H])=C2C([H])([H])[H])C(=C(C=1C1C([H])=C([H])C(=C([H])C=1OC([H])([H])[H])C([H])([H])[H])N([H])[H])N([H])[H]	3.35236	5.899126	1.4347239999999999	5.91780466	0.6251460800000004	3.3272588
[H]C1N=C(C2C([H])=C([H])C(=C([H])C=2OC([H])([H])[H])C([H])([H])[H])C(=C(C=1C1=C([H])C([H])=C(OC([H])([H])[H])C([H])=C1C([H])([H])[H])N([H])[H])N([H])[H]	3.17059	5.88766	1.32782	5.9073706	0.5267944	3.1763897
[H]C1=NC(OC([H])([H])[H])=C(C([H])=C1[H])C1=C([H])C(C2C([H])=NC(OC([H])([H])[H])=C([H])C=2[H])=C(C(=C1[H])C([H])(C([H])([H])[H])C([H])([H])[H])N([H])[H]	3.2867900000000003	5.8132220000000006	1.0433560000000002	5.839632020000001	0.2650875199999998	3.2728357000000003
[H]C1=NC(OC([H])([H])[H])=C(C([H])=C1[H])C1C([H])=C(C([H])=C(C=1N([H])[H])C([H])(C([H])([H])[H])C([H])([H])[H])C1C([H])=NC(OC([H])([H])[H])=C([H])C=1[H]	3.3913699999999998	5.801119	1.0566039999999992	5.82861829	0.2772756799999989	3.3596370999999996
[H]C1N=C(C([H])=C(C=1C1C([H])=C([H])C(=C(C=1N([H])[H])C([H])([H])[H])C([H])([H])[H])[N+](=O)[O-])C1=C([H])C([H])=C(C(=C1C([H])([H])[H])C([H])([H])[H])N([H])[H]	2.46675	6.078396	2.7529	6.08094036	1.8378679999999998	2.5922025000000004
[H]C1N=C(C([H])=C(C=1C1=C([H])C([H])=C(C(=C1C([H])([H])[H])C([H])([H])[H])N([H])[H])[N+](=O)[O-])C1C([H])=C([H])C(=C(C=1N([H])[H])C([H])([H])[H])C([H])([H])[H]	2.3414200000000003	6.123441000000001	2.7234599999999998	6.121931310000001	1.8107831999999995	2.4881786000000004
[H]C1=C([H])C([H])=C2C([H])=C(N=C(C3C([H])=C([H])C(OC(C([H])([H])[H])(C([H])([H])[H])C([H])([H])[H])=C([H])C=3[H])C2=C1[H])C1C([H])=C([H])C([H])=C([H])C=1OC(C([H])([H])[H])(C([H])([H])[H])C([H])([H])[H]	3.08759	6.057193	1.698856	6.06164563	0.86814752	3.1074997
[H]C1=C([H])C([H])=C2C([H])=C(N=C(C2=C1[H])C1C([H])=C([H])C([H])=C([H])C=1OC(C([H])([H])[H])(C([H])([H])[H])C([H])([H])[H])C1C([H])=C([H])C(OC(C([H])([H])[H])(C([H])([H])[H])C([H])([H])[H])=C([H])C=1[H]	3.23616	6.208708000000001	1.74688	6.19952428	0.9123295999999996	3.2308128
[H]C(=O)C1=C([H])C([H])=C(C([H])=C1F)C1=C([H])C(=NC([H])=C1F)C1C([H])=C([H])C([H])=C(F)C=1C([H])=O	2.66014	7.1348150000000015	2.617752	7.042281650000001	1.71353184	2.7527162
[H]C(=O)C1=C([H])C([H])=C(C2=NC([H])=C(F)C(=C2[H])C2C([H])=C([H])C([H])=C(F)C=2C([H])=O)C([H])=C1F	2.72073	7.123713	2.618948	7.03217883	1.7146321599999998	2.8030059000000005
[H]C(=O)C1=NC(=C([H])N=C1C1=NC([H])=C([H])N1C([H])([H])[H])C1=C([H])N=C([H])N1C([H])([H])[H]	2.24846	6.398716	2.74784	6.372431560000001	1.8332128	2.4110218000000003
[H]C(=O)C1=NC(C2=NC([H])=C([H])N2C([H])([H])[H])=C([H])N=C1C1=C([H])N=C([H])N1C([H])([H])[H]	2.40865	6.3930739999999995	2.663016	6.3672973399999995	1.7551747199999999	2.5439795000000003
[H]C1=C(Cl)C([H])=C(C(=C1Cl)C1C([H])=C(C([H])=C2C=1OC([H])([H])C2([H])[H])C1C(Cl)=C([H])C(=C([H])C=1Cl)N([H])[H])N([H])[H]	3.42955	6.109973	1.0522799999999997	6.10967543	0.27329759999999936	3.3913265
[H]C1=C(Cl)C([H])=C(C(=C1Cl)C1=C([H])C(=C2OC([H])([H])C([H])([H])C2=C1[H])C1C(Cl)=C([H])C(=C([H])C=1Cl)N([H])[H])N([H])[H]	3.3581699999999994	6.1066970000000005	1.0983720000000003	6.10669427	0.31570224000000024	3.3320811
[H]C1=C([H])C(C2C(I)=C(C([H])=C(C=2[N+](=O)[O-])C([H])([H])[H])C2=C([H])C([H])=C(C(=C2[H])C([H])([H])[H])[N+](=O)[O-])=C(C(=C1[H])C([H])([H])[H])[N+](=O)[O-]	3.1573099999999994	7.102328	2.70552	7.01271848	1.7942783999999996	3.1653672999999998
[H]C1=C([H])C(C2C([H])=C(C(=C(C=2I)C2=C([H])C([H])=C(C(=C2[H])C([H])([H])[H])[N+](=O)[O-])[N+](=O)[O-])C([H])([H])[H])=C(C(=C1[H])C([H])([H])[H])[N+](=O)[O-]	3.1432	7.008234	2.84076	6.92709294	1.9186991999999998	3.1536560000000002
[H]C1=C([H])C(C2=NC(C3=C([H])C([H])=C4C(=C3[H])C(C(=O)N4[H])(C([H])([H])[H])C([H])([H])[H])=C(C(=C2[H])N([H])[H])[N+](=O)[O-])=C2C(=C1[H])C(C(=O)N2[H])(C([H])([H])[H])C([H])([H])[H]	2.49746	6.650967999999999	2.6436040000000003	6.601980879999999	1.73731568	2.6176918000000002
[H]C1=C([H])C(C2N=C(C([H])=C(C=2[N+](=O)[O-])N([H])[H])C2=C([H])C([H])=C3C(=C2[H])C(C(=O)N3[H])(C([H])([H])[H])C([H])([H])[H])=C2C(=C1[H])C(C(=O)N2[H])(C([H])([H])[H])C([H])([H])[H]	2.5215300000000003	6.653971	2.612692	6.60471361	1.7088766399999997	2.6376699000000006
[H]C1=NC(=C([H])C2=C([H])C([H])=C([H])C([H])=C12)C1=C(F)C(C2=NC([H])=C([H])C3=C([H])C([H])=C([H])C([H])=C23)=C(F)C([H])=C1N([H])[H]	2.85851	5.94954	1.7795400000000001	5.9636814	0.9423767999999999	2.9173633
[H]C1=NC(=C([H])C2=C([H])C([H])=C([H])C([H])=C12)C1=C(F)C([H])=C(C(C2=NC([H])=C([H])C3=C([H])C([H])=C([H])C([H])=C23)=C1F)N([H])[H]	2.94566	5.930066	1.716796	5.94596006	0.8846523199999998	2.9896978
[H]C1N=C(N=C(C=1C1C(=C([H])C([H])=C(C=1C([H])([H])[H])C([H])([H])[H])N([H])[H])C([H])([H])[H])C1C([H])=C(C(=C([H])C=1N([H])[H])C([H])([H])[H])C([H])([H])[H]	2.95064	5.897488	1.4903839999999997	5.91631408	0.6763532799999998	2.9938312
[H]C1N=C(N=C(C=1C1C([H])=C(C(=C([H])C=1N([H])[H])C([H])([H])[H])C([H])([H])[H])C([H])([H])[H])C1C(=C([H])C([H])=C(C=1C([H])([H])[H])C([H])([H])[H])N([H])[H]	2.82531	5.886386	1.5133839999999998	5.90621126	0.6975132799999999	2.8898073
[H]C1N=C2C(=C([H])C(Cl)=NN2C=1[H])C1C([H])=C(C([H])=C([H])C=1C(=O)OC([H])([H])[H])C1=C([H])N=C2C([H])=C([H])C(Cl)=NN21	2.6236200000000003	6.544589	2.5325599999999997	6.50517599	1.6351551999999998	2.7224046000000004
[H]C1N=C2C(=C([H])C(Cl)=NN2C=1[H])C1C([H])=C([H])C(C(=O)OC([H])([H])[H])=C(C=1[H])C1=C([H])N=C2C([H])=C([H])C(Cl)=NN21	2.63773	6.618936	2.446908	6.57283176	1.55635536	2.7341159
[H]C(=O)C1C([H])=C([H])C(C2=NC([H])=C([H])N=C2N(C([H])([H])[H])C([H])([H])[H])=C([H])C=1C1N=C([H])C(=NC=1[H])N(C([H])([H])[H])C([H])([H])[H]	2.5729900000000003	6.225998000000001	2.347732	6.215258180000001	1.46511344	2.6803817000000008
[H]C(=O)C1C([H])=C([H])C(=C([H])C=1C1=NC([H])=C([H])N=C1N(C([H])([H])[H])C([H])([H])[H])C1N=C([H])C(=NC=1[H])N(C([H])([H])[H])C([H])([H])[H]	2.56137	6.149467	2.342396	6.14561497	1.46020432	2.6707371
[H]C(=O)C1C([H])=C([H])N=C(C=1[H])C1C([H])=C([H])C(=C2N=C(SC=12)C1C([H])=C([H])C([H])=C([H])C=1[H])C1=C([H])N=C([H])C([H])=C1C([H])=O	2.79045	6.43366	2.64664	6.4042306	1.7401087999999998	2.8608735000000003
[H]C(=O)C1C([H])=C([H])N=C(C=1[H])C1C([H])=C([H])C(=C2SC(=NC=12)C1C([H])=C([H])C([H])=C([H])C=1[H])C1=C([H])N=C([H])C([H])=C1C([H])=O	2.7547599999999997	6.418099	2.676816	6.39007009	1.76787072	2.8312508
[H]C1=NC(=C([H])N=C1Cl)C1=C([H])C2=C([H])N=C([H])N2C(C2=NC([H])=C([H])N=C2Cl)=C1[H]	2.32482	5.892847	2.2629080000000004	5.91209077	1.3870753599999999	2.4744006
[H]C1=NC(=C([H])N=C1Cl)C1=C([H])C(C2=NC([H])=C([H])N=C2Cl)=C([H])C2=C([H])N=C([H])N21	2.3605099999999997	5.8908450000000006	2.26208	5.910268950000001	1.3863136000000003	2.5040233
[H]C(=O)C1C([H])=C([H])N=C(C=1[H])C1=C(C([H])=C(C([H])=C1C([H])([H])[H])C1=C([H])N=C([H])C([H])=C1C([H])=O)[N+](=O)[O-]	2.77385	7.025614999999999	2.790712	6.942909649999999	1.8726550399999997	2.8470955
[H]C(=O)C1C([H])=C([H])N=C(C=1[H])C1=C([H])C(=C(C2=C([H])N=C([H])C([H])=C2C([H])=O)C(=C1[H])C([H])([H])[H])[N+](=O)[O-]	2.48999	7.034988	2.739744	6.95143908	1.8257644800000001	2.6114917
[H]C1SC(=C(C2=NC(=NN2C([H])([H])[H])C2SC(=C([H])C=2[H])C([H])([H])[H])C=1[H])C([H])([H])[H]	3.30671	5.898307	1.2866959999999998	5.9170593700000005	0.48896032000000034	3.2893692999999997
[H]C1SC(=C(C2=NN(C(=N2)C2SC(=C([H])C=2[H])C([H])([H])[H])C([H])([H])[H])C=1[H])C([H])([H])[H]	3.4710499999999995	5.898853000000001	1.2122680000000001	5.917556230000001	0.4204865599999996	3.4257714999999997
[H]C1=C(F)N=C(C(=C1[H])C1=C([H])C(=C(C([H])=C1C([H])([H])[H])C1=C(F)N=C(C([H])=C1[H])C([H])([H])[H])N([H])[H])C([H])([H])[H]	3.28513	5.939621	1.138116	5.95465511	0.35226672000000026	3.2714579
[H]C1=C(F)N=C(C(=C1[H])C1C([H])=C(C(=C([H])C=1N([H])[H])C1=C(F)N=C(C([H])=C1[H])C([H])([H])[H])C([H])([H])[H])C([H])([H])[H]	3.10087	5.90404	1.1532039999999997	5.9222764	0.3661476799999992	3.1185221
[H]C1N=C2C(=C([H])C=1[H])C(C1=C([H])C(=NC([H])=C1N([H])[H])C1=C([H])N=C3C(=C1[H])C([H])=C([H])N3[H])=C([H])N2[H]	3.05439	5.64196	1.218432	5.6837836	0.4261574399999999	3.0799437000000003
[H]C1N=C2C(=C([H])C=1[H])C(C1=NC([H])=C(C(=C1[H])C1=C([H])N=C3C(=C1[H])C([H])=C([H])N3[H])N([H])[H])=C([H])N2[H]	3.17308	5.754072	1.2612119999999996	5.78580552	0.46551503999999966	3.1784564
[H]C1C2=NSN=C2C(=C(F)C=1[H])C1C([H])=C(C([H])=C(F)C=1N([H])[H])C1C2=NSN=C2C([H])=C(F)C=1[H]	2.56718	5.888661	2.99302	5.90828151	2.0587784	2.6755594
[H]C1C2=NSN=C2C(=C(F)C=1[H])C1C([H])=C(F)C(=C(C=1[H])C1C2=NSN=C2C([H])=C(F)C=1[H])N([H])[H]	2.46011	5.862998999999999	2.974804	5.88492909	2.0420196799999997	2.5866913
[H]C1=NC(=C([H])C2=C([H])C([H])=C([H])C([H])=C12)C1C2=NC([H])=C(C3=NC([H])=C([H])C4=C([H])C([H])=C([H])C([H])=C34)N2N=C(Cl)C=1[H]	2.6775700000000002	6.270951999999999	2.409832	6.256166319999999	1.5222454399999998	2.7671831000000005
[H]C1=NC(=C([H])C2=C([H])C([H])=C([H])C([H])=C12)C1=C([H])N=C2C(C3=NC([H])=C([H])C4=C([H])C([H])=C([H])C([H])=C34)=C([H])C(Cl)=NN21	2.72654	6.382517999999999	2.42722	6.3576913799999994	1.5382424000000001	2.8078282000000003
[H]C1=C([H])C(=C(F)C(F)=C1[H])C1C(I)=C(C([H])=C(C=1[N+](=O)[O-])C([H])([H])[H])C1C([H])=C(F)C(F)=C([H])C=1[H]	3.2120900000000003	6.928336	2.481224	6.8543857599999996	1.58792608	3.2108347000000004
[H]C1=C([H])C(=C(F)C(F)=C1[H])C1C([H])=C(C(=C(C=1I)C1C([H])=C(F)C(F)=C([H])C=1[H])[N+](=O)[O-])C([H])([H])[H]	3.27517	6.880014999999999	2.48564	6.810413649999999	1.5919888000000002	3.2631911000000002
[H]C1=NC(C2C([H])=C(C(C3=NC([H])=C(N3[H])C(F)(F)F)=C([H])C=2C([H])([H])[H])C([H])([H])[H])=C(N1[H])C(F)(F)F	3.193	6.152925	1.4792519999999998	6.14876175	0.6661118399999992	3.19499
[H]C1=NC(C2=C([H])C(=C(C3=NC([H])=C(N3[H])C(F)(F)F)C([H])=C2C([H])([H])[H])C([H])([H])[H])=C(N1[H])C(F)(F)F	3.1548199999999995	6.149467	1.4967319999999995	6.14561497	0.6821934399999998	3.1633005999999995
[H]C1=C([H])C(=C(C2=C(F)C(Cl)=C([H])C(C3C([H])=C([H])C(=C([H])C=3C([H])([H])[H])C([H])([H])[H])=C2N([H])[H])C(=C1[H])C([H])([H])[H])C([H])([H])[H]	3.2926	6.210528	0.956232	6.20118048	0.18493344	3.277658
[H]C1=C([H])C(=C(C2C([H])=C(Cl)C(F)=C(C3C([H])=C([H])C(=C([H])C=3C([H])([H])[H])C([H])([H])[H])C=2N([H])[H])C(=C1[H])C([H])([H])[H])C([H])([H])[H]	3.3556800000000004	6.234552000000001	0.9369119999999996	6.223042320000001	0.1671590399999996	3.3300144000000005
[H]C1=NC(=C([H])C2C1=NN([H])C=2[H])C1=C([H])C(C2=C3C(=NN2[H])C([H])=NC([H])=C3[H])=C2C(=C1[H])C(C(=O)N2[H])(C([H])([H])[H])C([H])([H])[H]	2.82199	5.984848	1.8674	5.99581168	1.0232079999999995	2.8870517
[H]C1=NC(=C([H])C2C1=NN([H])C=2[H])C1C([H])=C(C([H])=C2C=1N([H])C(=O)C2(C([H])([H])[H])C([H])([H])[H])C1=C2C(=NN1[H])C([H])=NC([H])=C2[H]	2.7863	5.977204	1.8349240000000002	5.988855640000001	0.9933300799999998	2.8574290000000007
[H]C1N=C2C([H])=C(C3=NC(=C([H])C4=C([H])C([H])=C([H])C([H])=C34)C3C([H])=C([H])N=C4C([H])=C([H])C([H])=C([H])C=34)C([H])=C([H])C2=C([H])C=1[H]	3.1905099999999997	6.281599	2.1296	6.26585509	1.2644320000000002	3.1929233
[H]C1N=C2C([H])=C(C([H])=C([H])C2=C([H])C=1[H])C1N=C(C2=C([H])C([H])=C([H])C([H])=C2C=1[H])C1C([H])=C([H])N=C2C([H])=C([H])C([H])=C([H])C=12	3.2867900000000003	6.3064420000000005	2.080104	6.28846222	1.2188956800000001	3.2728357000000003
[H]C(=O)C1SC(=NC=1C1C([H])=C([H])C(=C(C=1N([H])[H])C([H])([H])[H])C([H])([H])[H])C1=C([H])C([H])=C(C(=C1C([H])([H])[H])C([H])([H])[H])N([H])[H]	2.49995	5.961461	2.435316	5.97452951	1.5456907199999996	2.6197585000000005
[H]C(=O)C1SC(=NC=1C1=C([H])C([H])=C(C(=C1C([H])([H])[H])C([H])([H])[H])N([H])[H])C1C([H])=C([H])C(=C(C=1N([H])[H])C([H])([H])[H])C([H])([H])[H]	2.58046	6.0217030000000005	2.454912	6.029349730000001	1.56371904	2.6865818
[H]C1C2=NN([H])C(=C2C([H])=C(C=1[H])C1C([H])=C([H])C([H])=C(C=1[N+](=O)[O-])C([H])([H])[H])C1C([H])=C([H])C([H])=C(C=1C([H])([H])[H])[N+](=O)[O-]	2.57631	6.1662110000000006	2.412868	6.160852010000001	1.5250385599999996	2.6831373000000003
[H]C1C2=NN([H])C(=C2C([H])=C(C=1[H])C1C([H])=C([H])C([H])=C(C=1C([H])([H])[H])[N+](=O)[O-])C1C([H])=C([H])C([H])=C(C=1[N+](=O)[O-])C([H])([H])[H]	2.96641	6.114523	2.302652	6.11381593	1.4236398399999999	3.0069203000000004
[H]C1=C([H])C(=C([H])C(=C1C1=C([H])C(=C(C2=C([H])C([H])=C(C([H])=C2C([H])([H])[H])N([H])[H])C(=C1[H])C([H])([H])C([H])([H])[H])C([H])([H])C([H])([H])[H])N([H])[H])C([H])([H])[H]	3.5689900000000003	5.781736	1.1992040000000002	5.81097976	0.4084676800000002	3.5070617000000004
[H]C1=C([H])C(=C([H])C(=C1C1C(=C([H])C(=C([H])C=1C([H])([H])C([H])([H])[H])C1=C([H])C([H])=C(C([H])=C1C([H])([H])[H])N([H])[H])C([H])([H])C([H])([H])[H])N([H])[H])C([H])([H])[H]	3.34738	5.769724	1.1894519999999993	5.8000488400000005	0.39949583999999927	3.3231254
[H]C(=O)C1=C([H])C([H])=C(C([H])=O)C(=C1[H])C1C([H])=C([H])C2OC([H])=C(C=2C=1[H])C1C([H])=C(C([H])=O)C([H])=C([H])C=1C([H])=O	2.5705	6.507552	2.7299	6.47147232	1.8167080000000002	2.6783150000000004
[H]C(=O)C1=C([H])C([H])=C(C([H])=O)C(=C1[H])C1=C([H])OC2C([H])=C([H])C(=C([H])C=21)C1C([H])=C(C([H])=O)C([H])=C([H])C=1C([H])=O	2.56884	6.52284	2.723552	6.485384400000001	1.8108678400000002	2.6769372000000002
[H]C1=NC(=C(C([H])=C1[H])C1C([H])=C(C([H])=C(C=1N([H])[H])C(F)(F)F)C1C([H])=NC(=C([H])C=1[H])N([H])[H])N([H])[H]	3.1299200000000003	5.787651	1.1513639999999998	5.81636241	0.36445488000000026	3.1426336000000004
[H]C1=NC(=C(C([H])=C1[H])C1=C([H])C(C2C([H])=NC(=C([H])C=2[H])N([H])[H])=C(C(=C1[H])C(F)(F)F)N([H])[H])N([H])[H]	3.24031	5.795022	1.1893599999999998	5.82307002	0.3994111999999994	3.2342573000000003
[H]C1=NC2=C([H])C(=C(C3=NC([H])=C(C4=C5N=C([H])N([H])C5=C([H])C([H])=C4N([H])[H])C(=C3N([H])[H])N([H])[H])C([H])=C2N1[H])N([H])[H]	2.86515	5.77755	1.3573519999999997	5.8071705	0.5539638399999998	2.9228745
[H]C1=NC2=C([H])C(=C(C([H])=C2N1[H])C1=C([H])N=C(C2=C3N=C([H])N([H])C3=C([H])C([H])=C2N([H])[H])C(=C1N([H])[H])N([H])[H])N([H])[H]	2.89752	5.7774589999999995	1.3200000000000005	5.8070876899999995	0.5196000000000005	2.9497416000000003
[H]C1=C(F)C(=C([H])C(=C1C1C([H])=C(C([H])=C(C=1N([H])[H])[N+]([O-])=NC([H])([H])[H])C1C(=C([H])C([H])=C(F)C=1C([H])([H])[H])N([H])[H])N([H])[H])C([H])([H])[H]	2.72156	5.9715620000000005	2.0329999999999995	5.98372142	1.175559999999999	2.8036948000000006
[H]C1=C(F)C(=C([H])C(=C1C1=C([H])C(C2C(=C([H])C([H])=C(F)C=2C([H])([H])[H])N([H])[H])=C(C(=C1[H])[N+]([O-])=NC([H])([H])[H])N([H])[H])N([H])[H])C([H])([H])[H]	2.84108	6.1112470000000005	1.78184	6.11083477	0.9444927999999999	2.9028964
[H]C1=NC(F)=C(C2C([H])=C(OC([H])([H])[H])C(=C(C3=NC(F)=C([H])N3C([H])([H])[H])C=2Cl)N([H])[H])N1C([H])([H])[H]	3.26853	5.900673	1.0607439999999997	5.91921243	0.28108447999999964	3.2576799000000003
[H]C1=NC(F)=C(C2C(Cl)=C(C3=NC(F)=C([H])N3C([H])([H])[H])C([H])=C(OC([H])([H])[H])C=2N([H])[H])N1C([H])([H])[H]	3.0958900000000003	5.778096	1.0847559999999996	5.80766736	0.3031755199999999	3.1143887
[H]C1=NC(Cl)=C(C([H])=C1[H])C1C(=NC(=NC=1[H])C1=NC(Cl)=C([H])C([H])=C1[H])C([H])([H])[H]	2.95396	6.8362440000000015	2.595764	6.770582040000002	1.69330288	2.9965868
[H]C1=NC(Cl)=C(C2=NC([H])=C(C3=NC(Cl)=C([H])C([H])=C3[H])C(=N2)C([H])([H])[H])C([H])=C1[H]	2.9747099999999995	6.8917540000000015	2.299064	6.821096140000002	1.42033888	3.0138092999999997
[H]C1=C([H])C(C2=C(C(=C([H])C(C3C([H])=C(OC([H])(F)F)C(=C([H])C=3[H])N([H])[H])=C2[N+](=O)[O-])C([H])([H])[H])N([H])[H])=C(C(OC([H])(F)F)=C1[H])N([H])[H]	2.47422	6.0763940000000005	2.304676	6.0791185400000005	1.4255019200000003	2.5984026
[H]C1=C([H])C(C2C([H])=C(C(=C(C3C([H])=C(OC([H])(F)F)C(=C([H])C=3[H])N([H])[H])C=2[N+](=O)[O-])N([H])[H])C([H])([H])[H])=C(C(OC([H])(F)F)=C1[H])N([H])[H]	2.30822	5.944444	2.307988	5.95904404	1.4285489599999996	2.4606226
[H]C1N=C(C([H])=C([H])C=1C1C([H])=C([H])C(OC([H])([H])[H])=C([H])C=1[H])C1C([H])=C([H])C([H])=C([H])C=1OC([H])([H])[H]	3.30173	5.982846	1.3952559999999998	5.99398986	0.58883552	3.2852359
[H]C1N=C(C([H])=C([H])C=1C1C([H])=C([H])C([H])=C([H])C=1OC([H])([H])[H])C1C([H])=C([H])C(OC([H])([H])[H])=C([H])C=1[H]	3.2934300000000003	6.0313490000000005	1.3757519999999994	6.03812759	0.5708918399999989	3.2783469000000003
[H]C1=NC2C(C([H])=C1[H])=C([H])C(OC([H])([H])[H])=C([H])C=2C1C([H])=C(C2C(OC([H])([H])[H])=C([H])C([H])=C3N=C([H])C([H])=C([H])C=23)C(=C([H])C=1OC([H])([H])[H])N([H])[H]	2.6983199999999994	5.626945	1.714588	5.67011995	0.8826209599999997	2.7844055999999995
[H]C1=NC2C(C([H])=C1[H])=C([H])C(OC([H])([H])[H])=C([H])C=2C1=C([H])C(=C(OC([H])([H])[H])C([H])=C1N([H])[H])C1C(OC([H])([H])[H])=C([H])C([H])=C2N=C([H])C([H])=C([H])C=12	2.57216	5.640777	1.71514	5.68270707	0.8831287999999997	2.6796927999999998
[H]C1=C([H])C([H])=C(C(=O)N([H])C2C([H])=C(C3=NN([H])C(=N3)C3C([H])=C([H])C([H])=C([H])C=3N([H])C(=O)C3C([H])=C([H])C([H])=C([H])C=3[H])C([H])=C([H])C=2[H])C([H])=C1[H]	2.9855	6.557238000000001	1.908248	6.516686580000001	1.0607881599999995	3.022765
[H]C1=C([H])C([H])=C(C(=O)N([H])C2C([H])=C(C3=NC(=NN3[H])C3C([H])=C([H])C([H])=C([H])C=3N([H])C(=O)C3C([H])=C([H])C([H])=C([H])C=3[H])C([H])=C([H])C=2[H])C([H])=C1[H]	2.92159	6.608835000000001	1.9312479999999999	6.563639850000001	1.0819481599999996	2.9697197
[H]C1=NC(=C(OC([H])([H])C([H])([H])[H])C([H])=C1N([H])[H])C1C([H])=C(C2=NC([H])=C(OC([H])([H])C([H])([H])[H])C([H])=C2N([H])[H])C([H])=C(C#N)C=1OC([H])([H])[H]	3.08925	5.956456	1.5302200000000001	5.96997496	0.7130023999999997	3.1088775
[H]C1=NC(=C(OC([H])([H])C([H])([H])[H])C([H])=C1N([H])[H])C1C([H])=C(C#N)C(OC([H])([H])[H])=C(C2=NC([H])=C(OC([H])([H])C([H])([H])[H])C([H])=C2N([H])[H])C=1[H]	3.0685	5.988397	1.545216	5.99904127	0.7267987199999997	3.0916550000000003
[H]C(=O)C1=C([H])N=C(C([H])=C1[H])C1C([H])=C([H])C2C([H])=C([H])C(=NC=2C=1[H])C1N=C([H])C([H])=C([H])C=1C([H])=O	2.87677	6.765810000000001	2.626584	6.7064871	1.7216572799999996	2.9325191000000004
[H]C(=O)C1=C([H])N=C(C2=NC3C([H])=C(C([H])=C([H])C=3C([H])=C2[H])C2N=C([H])C([H])=C([H])C=2C([H])=O)C([H])=C1[H]	2.8369299999999997	6.737782000000001	2.589876	6.680981620000001	1.6878859199999998	2.8994519
[H]C1N=C2C(=C([H])C=1[H])C(C1C([H])=C([H])C(=C([H])C=1[N+](=O)[O-])C1=C([H])N=C3C(=C1[H])C([H])=C([H])N3[H])=C([H])N2[H]	2.7448	6.2281819999999986	2.344696	6.217245619999998	1.46232032	2.8229840000000004
[H]C1N=C2C(=C([H])C=1[H])C(C1C([H])=C([H])C(C3=C([H])N=C4C(=C3[H])C([H])=C([H])N4[H])=C(C=1[H])[N+](=O)[O-])=C([H])N2[H]	2.43355	6.2217210000000005	2.3169120000000003	6.21136611	1.43675904	2.5646465000000003
[H]C1N=C2C([H])=C([H])C(C3C(F)=C([H])C([H])=C(C=3N([H])[H])C([H])([H])[H])=C([H])N2C=1C1C([H])=C(C(=C([H])C=1F)N([H])[H])C([H])([H])[H]	3.0220199999999995	5.656429	1.0001159999999991	5.69695039	0.22530671999999896	3.0530766
[H]C1N=C2C([H])=C([H])C(C3C([H])=C(C(=C([H])C=3F)N([H])[H])C([H])([H])[H])=C([H])N2C=1C1C(F)=C([H])C([H])=C(C=1N([H])[H])C([H])([H])[H]	2.95811	5.492083	0.932772	5.54739553	0.16335023999999976	3.0000313
[H]C1=NC([H])=C(C([H])=C1Cl)C1C(F)=C([H])C(C2=NC([H])=C([H])C([H])=C2Cl)=C([H])C=1F	3.75325	7.091317	1.6451279999999997	7.00269847	0.8187177599999993	3.6599975000000002
[H]C1=NC([H])=C(C([H])=C1Cl)C1C([H])=C(F)C(C2=NC([H])=C([H])C([H])=C2Cl)=C(F)C=1[H]	3.31335	6.809125999999999	2.245612	6.745904659999999	1.3711630399999999	3.2948804999999997
[H]C1=C([H])C(=C([H])C(=C1Cl)C1=C([H])C(=C(Cl)C(=C1[H])C(F)(F)F)C1=C([H])C(Cl)=C([H])C([H])=C1C([H])([H])[H])C([H])([H])[H]	3.82629	6.843706	1.5678479999999997	6.7773724600000005	0.7476201599999994	3.7206207000000004
[H]C1=C([H])C(=C([H])C(=C1Cl)C1C([H])=C(C([H])=C(C=1Cl)C(F)(F)F)C1=C([H])C(Cl)=C([H])C([H])=C1C([H])([H])[H])C([H])([H])[H]	3.77483	6.8223210000000005	1.615688	6.75791211	0.7916329600000003	3.6779089000000003
[H]C1=NC2C(C([H])=C1[H])=C([H])C([H])=C([H])C=2C1C([H])=C(C2C([H])=C([H])C([H])=C3N=C([H])C([H])=C([H])C=23)C(=C(C=1[N+](=O)[O-])C([H])([H])[H])N([H])[H]	2.45845	6.243743	2.407348	6.23140613	1.5199601599999997	2.5853135000000003
[H]C1=NC2C(C([H])=C1[H])=C([H])C([H])=C([H])C=2C1=C([H])C(C2C([H])=C([H])C([H])=C3N=C([H])C([H])=C([H])C=23)=C(C(=C1N([H])[H])C([H])([H])[H])[N+](=O)[O-]	2.5588800000000003	6.183774	2.322432	6.176834339999999	1.44183744	2.6686704000000003
[H]C1=NC2=C(C([H])=C(OC([H])([H])[H])C(=C2C([H])=C1[H])C1C([H])=C([H])C([H])=C2C([H])=NN([H])C=12)C1=C([H])C([H])=C2C(C([H])=NN2[H])=C1[H]	2.8112	5.896668999999998	1.856084	5.915568789999998	1.01279728	2.878096
[H]C1=NC2=C(C([H])=C(OC([H])([H])[H])C(C3=C([H])C([H])=C4C(C([H])=NN4[H])=C3[H])=C2C([H])=C1[H])C1C([H])=C([H])C([H])=C2C([H])=NN([H])C=12	2.8369299999999997	5.868914	1.7901200000000002	5.8903117400000005	0.9521103999999996	2.8994519
[H]C1=C([H])C(=C(OC([H])([H])[H])C(C#N)=C1[H])C1C([H])=C([H])C(C2C([H])=C(C#N)C(OC([H])([H])[H])=C([H])C=2[H])=C(C=1C([H])([H])[H])[N+](=O)[O-]	2.98965	6.693738000000001	2.439824	6.64090158	1.5498380799999998	3.0262095
[H]C1=C([H])C(=C(OC([H])([H])[H])C(C#N)=C1[H])C1C([H])=C([H])C(C2C([H])=C(C#N)C(OC([H])([H])[H])=C([H])C=2[H])=C(C=1[N+](=O)[O-])C([H])([H])[H]	3.21541	6.766811	2.4051400000000003	6.70739801	1.5179288	3.2135903
[H]C(=O)C1=C([H])C(C2=NC([H])=C([H])S2)=C([H])C(=C1OC([H])(C([H])([H])[H])C([H])([H])[H])C1SC([H])=NC=1[H]	2.6277699999999995	6.231822	2.215068	6.22055802	1.34306256	2.7258490999999996
[H]C(=O)C1=C([H])C(=C([H])C(C2=NC([H])=C([H])S2)=C1OC([H])(C([H])([H])[H])C([H])([H])[H])C1SC([H])=NC=1[H]	2.78879	6.3472100000000005	2.2374240000000003	6.325561100000001	1.36363008	2.8594957
[H]C(=O)C1=C([H])C(=C([H])C([H])=C1F)C1C([H])=C(C([H])=C([H])C=1[N+](=O)[O-])C1C([H])=C([H])C([H])=C(C([H])=O)C=1F	2.861	7.2573919999999985	2.681232	7.153826719999999	1.7719334399999997	2.91943
[H]C(=O)C1=C([H])C(=C([H])C([H])=C1F)C1C([H])=C([H])C(=C(C=1[H])C1C([H])=C([H])C([H])=C(C([H])=O)C=1F)[N+](=O)[O-]	2.78298	7.2560270000000004	2.686568	7.15258457	1.7768425599999995	2.8546734000000002
[H]C1=NC(=C([H])N=C1Cl)C1=C([H])C(C2=NC([H])=C([H])N=C2Cl)=C2C(C([H])=NN2[H])=C1[H]	2.94898	6.446764	2.219208	6.41615524	1.3468713599999997	2.9924534000000005
[H]C1=NC(=C([H])N=C1Cl)C1C([H])=C(C2=NC([H])=C([H])N=C2Cl)C([H])=C2C([H])=NN([H])C=12	3.00376	6.41	2.172288	6.3827	1.3037049600000001	3.0379208
[H]C1=NC([H])=C(C2C(=NC([H])=C(C3=NC([H])=C([H])C(=C3[H])N([H])[H])C=2OC([H])([H])[H])N([H])[H])C(=C1[H])N([H])[H]	3.1954899999999995	6.0006819999999985	1.284948	6.010220619999998	0.4873521599999995	3.1970566999999996
[H]C1=NC([H])=C(C2=C([H])N=C(C(C3=NC([H])=C([H])C(=C3[H])N([H])[H])=C2OC([H])([H])[H])N([H])[H])C(=C1[H])N([H])[H]	3.2975800000000004	6.085585	1.3081319999999996	6.08748235	0.5086814399999993	3.2817914000000004
[H]C1=NC(Cl)=C(C([H])=C1[H])C1C([H])=C([H])C(N=C=S)=C(C2=NC(Cl)=C([H])C([H])=C2[H])C=1[H]	3.27517	6.450404000000002	2.167872	6.4194676400000015	1.2996422399999998	3.2631911000000002
[H]C1=NC(Cl)=C(C([H])=C1[H])C1C([H])=C(C2=NC(Cl)=C([H])C([H])=C2[H])C([H])=C([H])C=1N=C=S	3.27517	6.447400999999998	2.173576	6.416734909999999	1.30488992	3.2631911000000002
[H]C1=C(F)C([H])=C(C(=C1F)C1=C(C(=NN1[H])C1C(F)=C([H])C(=C([H])C=1F)N([H])[H])[N+](=O)[O-])N([H])[H]	2.89088	6.488624	2.380208	6.45424784	1.4949913600000002	2.9442304000000004
[H]C1=C(F)C([H])=C(C(C2=NN([H])C(C3C(F)=C([H])C(=C([H])C=3F)N([H])[H])=C2[N+](=O)[O-])=C1F)N([H])[H]	2.74563	6.585266000000002	2.432096	6.542192060000001	1.5427283200000002	2.8236729
[H]C1=C([H])C(=C(Cl)C(OC(F)(F)F)=C1[H])C1C([H])=C(C([H])=C(C=1N([H])[H])C([H])([H])N(C([H])([H])[H])C1([H])C([H])([H])C([H])([H])C([H])([H])C([H])([H])C1([H])[H])C1C([H])=C(OC(F)(F)F)C(Cl)=C([H])C=1[H]	3.3009000000000004	6.002229	1.741912	6.01162839	0.9077590400000002	3.2845470000000003
[H]C1=C([H])C(=C(Cl)C(OC(F)(F)F)=C1[H])C1=C([H])C(C2C([H])=C(OC(F)(F)F)C(Cl)=C([H])C=2[H])=C(C(=C1[H])C([H])([H])N(C([H])([H])[H])C1([H])C([H])([H])C([H])([H])C([H])([H])C([H])([H])C1([H])[H])N([H])[H]	3.3399099999999997	5.9522699999999995	1.783404	5.9661656999999995	0.9459316800000002	3.3169253
[H]C1=C([H])C(=C(Cl)C(=C1[H])C([H])([H])[H])C1C(F)=C(C([H])=C([H])C=1[N+](=O)[O-])C1C([H])=C([H])C([H])=C(Cl)C=1C([H])([H])[H]	3.06684	7.114795	2.756488	7.02406345	1.84116896	3.0902772
[H]C1=C([H])C(=C(Cl)C(=C1[H])C([H])([H])[H])C1C([H])=C([H])C(=C(C=1F)C1C([H])=C([H])C([H])=C(Cl)C=1C([H])([H])[H])[N+](=O)[O-]	3.0187	7.110882000000001	2.741124	7.020502620000001	1.8270340799999998	3.0503210000000003
[H]C1N=C(C2C([H])=C([H])C([H])=C(C=2F)C([H])([H])[H])N([H])C=1C1=C([H])C([H])=C(F)C(=C1[H])C([H])([H])[H]	3.01123	5.957639	1.3060159999999996	5.971051490000001	0.5067347199999999	3.0441209000000002
[H]C1N=C(C2=C([H])C([H])=C(F)C(=C2[H])C([H])([H])[H])N([H])C=1C1C([H])=C([H])C([H])=C(C=1F)C([H])([H])[H]	3.0427699999999995	5.952725	1.296723999999999	5.96657975	0.4981860799999991	3.0702990999999997
[H]C(=O)C1=C([H])SC(=C1[H])C1C([H])=C([H])C(=C([H])C=1C([H])(C([H])([H])[H])C([H])([H])[H])C1SC([H])=C([H])C=1C([H])=O	2.8717900000000003	6.186413	2.103288	6.17923583	1.24022496	2.9283857000000006
[H]C(=O)C1=C([H])SC(=C1[H])C1C([H])=C([H])C(C2SC([H])=C([H])C=2C([H])=O)=C(C=1[H])C([H])(C([H])([H])[H])C([H])([H])[H]	2.7921099999999996	6.166848	2.1683319999999995	6.16143168	1.3000654399999991	2.8622512999999996
[H]C1=NN(C(C2C([H])=C(C#N)C(F)=C(C3=NN(C([H])=C3[N+](=O)[O-])C([H])([H])[H])C=2[H])=C1[N+](=O)[O-])C([H])([H])[H]	3.1880199999999994	7.399807000000001	2.570096	7.2834243700000005	1.6696883199999997	3.1908565999999996
[H]C1=NN(C(C2C([H])=C(C3=NN(C([H])=C3[N+](=O)[O-])C([H])([H])[H])C([H])=C(C#N)C=2F)=C1[N+](=O)[O-])C([H])([H])[H]	3.3407400000000003	7.503547	2.5883119999999997	7.37782777	1.6864470399999996	3.3176142000000004
[H]C1=C([H])C(C2C([H])=C(C(=C([H])C=2N([H])[H])C2C([H])=C(F)C(=C([H])C=2[H])C([H])([H])[H])C([H])([H])[H])=C(C(F)=C1[H])C([H])([H])[H]	3.23367	5.828874	0.8332280000000001	5.85387534	0.07176975999999957	3.2287461000000004
[H]C1=C([H])C(C2=C([H])C(=C(C([H])=C2C([H])([H])[H])C2C([H])=C(F)C(=C([H])C=2[H])C([H])([H])[H])N([H])[H])=C(C(F)=C1[H])C([H])([H])[H]	3.40797	5.889571	0.8351600000000001	5.90910961	0.07354720000000015	3.3734151000000003
[H]C1=NC(C2=C([H])C(C3=NC([H])=C(C(=C3[H])N([H])[H])[N+](=O)[O-])=C(F)C(=C2[H])C([H])([H])[H])=C(C(=C1[H])N([H])[H])[N+](=O)[O-]	2.59872	6.873463	2.588588	6.80445133	1.68670096	2.7017376000000004
[H]C1=NC(C2C([H])=C(C3=NC([H])=C(C(=C3[H])N([H])[H])[N+](=O)[O-])C([H])=C(C=2F)C([H])([H])[H])=C(C(=C1[H])N([H])[H])[N+](=O)[O-]	2.46177	6.913503	2.59098	6.84088773	1.6889016	2.5880691000000002
[H]C1=NC(C2=NC(Cl)=C(C3=NC([H])=C(N3C([H])([H])[H])C([H])([H])[H])C([H])=C2[H])=C(N1C([H])([H])[H])C([H])([H])[H]	2.99795	5.92952	1.585788	5.9454632	0.7641249600000002	3.0330985000000004
[H]C1=NC(C2=C(Cl)N=C(C3=NC([H])=C(N3C([H])([H])[H])C([H])([H])[H])C([H])=C2[H])=C(N1C([H])([H])[H])C([H])([H])[H]	3.1681	6.027618	1.4004079999999997	6.03473238	0.5935753599999991	3.1743230000000002
[H]C1=NC([H])=C(C2C(=C([H])C(C3=NC([H])=C([H])C4=C3C([H])=C([H])N4[H])=C([H])C=2C([H])([H])[H])C([H])([H])[H])C2=C1C([H])=C([H])N2[H]	3.2867900000000003	5.960642	1.2531160000000003	5.97378422	0.4580667200000006	3.2728357000000003
[H]C1=NC([H])=C(C2=C([H])C(=C(C3=NC([H])=C([H])C4=C3C([H])=C([H])N4[H])C(=C2[H])C([H])([H])[H])C([H])([H])[H])C2=C1C([H])=C([H])N2[H]	3.2212199999999998	5.90859	1.3073040000000002	5.9264169	0.5079196799999997	3.2184125999999997
[H]C1=NC(=C([H])S1)C1=C([H])C(C2=NC([H])=C([H])S2)=C(C(=C1[H])C([H])([H])[H])N([H])[H]	3.11	5.596551	1.3826520000000002	5.64246141	0.5772398399999998	3.1261
[H]C1SC(=NC=1C1C([H])=C([H])C([H])=C(C=1N([H])[H])C([H])([H])[H])C1=C([H])C([H])=C(C(=C1[H])C([H])([H])[H])N([H])[H]	2.7381599999999997	5.475702999999998	1.379892	5.532489729999998	0.5747006399999997	2.8174728
[H]C1=NN(C(=N1)C1C([H])=C([H])C(C2=NN(C([H])=N2)C([H])([H])C2C([H])=C([H])C([H])=C([H])C=2[H])=C([H])C=1C([H])([H])C#N)C([H])([H])C1C([H])=C([H])C([H])=C([H])C=1[H]	3.4096300000000004	6.534033	1.562696	6.49557003	0.7428803199999994	3.3747929
[H]C1=NN(C(=N1)C1C([H])=C([H])C(C2=NN(C([H])=N2)C([H])([H])C2C([H])=C([H])C([H])=C([H])C=2[H])=C(C=1[H])C([H])([H])C#N)C([H])([H])C1C([H])=C([H])C([H])=C([H])C=1[H]	3.5108900000000003	6.648784	1.4649	6.59999344	0.652908	3.4588387000000003
[H]SC1C([H])=C([H])C(C2=NC([H])=C(C([H])=C2[H])C([H])([H])[H])=C([H])C=1C1N=C([H])C([H])=C([H])C=1C([H])([H])[H]	3.4262300000000003	5.931158	1.2404199999999994	5.946953779999999	0.44638639999999974	3.3885709000000004
[H]SC1C([H])=C([H])C(=C([H])C=1C1=NC([H])=C(C([H])=C1[H])C([H])([H])[H])C1N=C([H])C([H])=C([H])C=1C([H])([H])[H]	3.3581699999999994	5.91951	1.3505440000000002	5.9363541	0.5477004799999996	3.3320811
[H]C1=NC([H])=C(C(C2=NN=C(C3=NC([H])=C(C([H])=C3[H])N([H])[H])C(=C2[H])C([H])([H])[H])=C1[H])N([H])[H]	2.85602	6.117708	1.834188	6.11671428	0.99265296	2.9152966000000005
[H]C1=NN=C(C2=C([H])C(=NC([H])=C2N([H])[H])C2=NN=C([H])C(=C2[H])C([H])([H])[H])C(=C1[H])C([H])([H])[H]	2.81867	6.1612969999999985	1.9042000000000003	6.156380269999999	1.0570640000000004	2.8842961000000003
[H]C(=O)C1=C([H])C(=C(C([H])=O)C([H])=C1C1=C([H])N=C(Cl)C([H])=C1N([H])[H])C1C(Cl)=NC([H])=C([H])C=1N([H])[H]	2.57797	6.8322400000000005	2.962936	6.766938400000001	2.0311011199999998	2.6845151000000005
[H]C(=O)C1=C([H])C(C2=C([H])N=C(Cl)C([H])=C2N([H])[H])=C(C([H])=O)C([H])=C1C1C(Cl)=NC([H])=C([H])C=1N([H])[H]	2.6028700000000002	6.833241	2.94702	6.767849310000001	2.0164584000000003	2.7051821000000005
[H]C1=NC([H])=C(C2=C([H])N=C3C(=C2[H])C(C2=NC([H])=C([H])C(=C2[N+](=O)[O-])C([H])([H])[H])=C([H])N3[H])C(=C1[N+](=O)[O-])C([H])([H])[H]	2.90499	6.424378	2.5063400000000002	6.39578398	1.6110328000000003	2.9559417000000003
[H]C1=NC([H])=C(C2C3C(=NC([H])=C(C4=NC([H])=C([H])C(=C4[N+](=O)[O-])C([H])([H])[H])C=3[H])N([H])C=2[H])C(=C1[N+](=O)[O-])C([H])([H])[H]	2.3721300000000003	6.41819	2.4693560000000003	6.3901529	1.5770075200000004	2.5136679000000006
[H]C1=NC2=NN([H])C(C3=NC(=C(C4C([H])=NC5=NN([H])C([H])=C5C=4[H])N3[H])[N+](=O)[O-])=C2C([H])=C1[H]	2.42525	6.604103	2.91528	6.5593337300000005	1.9872576	2.5577575
[H]C1=NC2=NN([H])C(=C2C([H])=C1[H])C1=C(N=C(C2C([H])=NC3=NN([H])C([H])=C3C=2[H])N1[H])[N+](=O)[O-]	2.57382	6.5647910000000005	2.638544	6.52355981	1.7326604799999998	2.6810706
[H]C1=NN([H])C2C1=C([H])C(=C([H])C=2C1C(=NC(=C([H])C=1[H])C([H])([H])[H])C([H])([H])[H])C1C([H])=C([H])C(=NC=1C([H])([H])[H])C([H])([H])[H]	3.3556800000000004	6.13791	1.2631439999999996	6.1350980999999996	0.46729247999999934	3.3300144000000005
[H]C1=NN([H])C2C1=C([H])C(=C([H])C=2C1C([H])=C([H])C(=NC=1C([H])([H])[H])C([H])([H])[H])C1C(=NC(=C([H])C=1[H])C([H])([H])[H])C([H])([H])[H]	3.31252	6.171671	1.2416159999999996	6.16582061	0.44748671999999967	3.2941916000000004
[H]C1=NC2C(C([H])=C1[H])=C([H])C([H])=C([H])C=2C1=NC([H])=C(S1)C1C([H])=C([H])C([H])=C2N=C([H])C([H])=C([H])C=12	2.10653	5.8704610000000015	2.601468	5.8917195100000015	1.6985505600000002	2.2932199
[H]C1=NC2C(C([H])=C1[H])=C([H])C([H])=C([H])C=2C1SC(=NC=1[H])C1C([H])=C([H])C([H])=C2N=C([H])C([H])=C([H])C=12	2.25178	5.8964870000000005	2.460432	5.91540317	1.56879744	2.4137774000000003
[H]SC1=C([H])C([H])=C([H])C(=C1[H])C1C([H])=C([H])C(C2C([H])=C([H])C([H])=C([H])C=2S[H])=C(C=1[H])C(F)(F)F	3.50923	6.108517	1.404916	6.1083504699999995	0.5977227200000002	3.4574609
[H]SC1=C([H])C([H])=C([H])C(=C1[H])C1C([H])=C([H])C(=C([H])C=1C(F)(F)F)C1C([H])=C([H])C([H])=C([H])C=1S[H]	3.35983	6.122167	1.4071239999999996	6.12077197	0.5997540799999994	3.3334589
[H]C1=C([H])C(=C(F)C(Cl)=C1[H])C1C([H])=C(C([H])=C(C=1Cl)C([H])([H])[H])C1C([H])=C([H])C([H])=C(F)C=1Cl	3.7665300000000004	6.740239000000001	1.5714359999999998	6.6832174900000005	0.7509211200000001	3.6710199000000006
[H]C1=C([H])C(=C(F)C(Cl)=C1[H])C1=C([H])C(=C(Cl)C(=C1[H])C([H])([H])[H])C1C([H])=C([H])C([H])=C(F)C=1Cl	3.8096900000000002	6.736235000000001	1.56058	6.679573850000001	0.7409336	3.7068427
[H]C1=C([H])C(=C(F)C([H])=C1C1C(I)=C([H])C([H])=C(C=1[N+](=O)[O-])C([H])([H])[H])C1C([H])=C(C(=C([H])C=1I)[N+](=O)[O-])C([H])([H])[H]	3.2627200000000003	6.751978	2.352148	6.69389998	1.46917616	3.2528576000000005
[H]C1=C([H])C(=C(F)C([H])=C1C1C([H])=C(C(=C([H])C=1I)[N+](=O)[O-])C([H])([H])[H])C1C(I)=C([H])C([H])=C(C=1[N+](=O)[O-])C([H])([H])[H]	3.1772299999999998	6.7667199999999985	2.414248	6.707315199999998	1.5263081600000001	3.1819009
[H]C1=NC([H])=C2C(C3=NC([H])=C(S3)C3=NC([H])=C4C([H])=C([H])N([H])C4=C3[H])=C([H])N([H])C2=C1[H]	2.5895900000000003	5.591364	1.7095279999999995	5.6377412399999995	0.8779657599999995	2.6941597
[H]C1=NC([H])=C2C(C3SC(=NC=3[H])C3=NC([H])=C4C([H])=C([H])N([H])C4=C3[H])=C([H])N([H])C2=C1[H]	2.69998	5.614023	1.6724519999999998	5.658360930000001	0.8438558399999998	2.7857834
[H]C1=NC([H])=C(C2=NC([H])=C(C3=NC([H])=C([H])C([H])=C3Cl)C3=C([H])C([H])=C([H])C([H])=C23)C([H])=C1Cl	2.98301	6.525024	2.310104	6.48737184	1.43049568	3.0206983000000003
[H]C1=NC([H])=C(C([H])=C1Cl)C1=C([H])N=C(C2=NC([H])=C([H])C([H])=C2Cl)C2=C([H])C([H])=C([H])C([H])=C12	2.94981	6.511647	2.343868	6.47519877	1.4615585600000003	2.9931422999999997
[H]C1=NC([H])=C(C2C([H])=C(C(Cl)=C(C3=NC([H])=C([H])N3[H])C=2N([H])[H])C([H])([H])[H])N1[H]	3.03945	5.919601	1.3613080000000002	5.93643691	0.5576033599999999	3.0675435
[H]C1=NC([H])=C(C2=C(Cl)C(=C([H])C(C3=NC([H])=C([H])N3[H])=C2N([H])[H])C([H])([H])[H])N1[H]	2.74646	5.791018	1.4254319999999998	5.81942638	0.6165974399999996	2.8243618
[H]C1=NN=C(C([H])=C1C1C([H])=C(C([H])=C([H])C=1[N+](=O)[O-])N([H])C(=O)C([H])([H])[H])C1=C([H])C(=C([H])C([H])=C1N([H])C(=O)C([H])([H])[H])[N+](=O)[O-]	2.80622	7.0820349999999985	2.782524	6.994251849999999	1.86512208	2.8739626000000005
[H]C1=NN=C(C([H])=C1C1=C([H])C(=C([H])C([H])=C1N([H])C(=O)C([H])([H])[H])[N+](=O)[O-])C1C([H])=C(C([H])=C([H])C=1[N+](=O)[O-])N([H])C(=O)C([H])([H])[H]	2.78132	7.064744999999999	2.8518920000000003	6.97851795	1.9289406400000004	2.8532956
[H]C1N=C2C([H])=C([H])C(C3C([H])=C(C([H])=C(C=3N([H])[H])C([H])([H])N(C([H])([H])[H])C3([H])C([H])([H])C([H])([H])C([H])([H])C([H])([H])C3([H])[H])C3=C([H])N=C4C([H])=C([H])C([H])=C([H])N43)=C([H])N2C=1[H]	3.08344	5.549958999999999	0.9508039999999998	5.60006269	0.1799396799999995	3.1040552000000003
[H]C1N=C2C([H])=C([H])C(C3=C([H])C(=C(C(=C3[H])C([H])([H])N(C([H])([H])[H])C3([H])C([H])([H])C([H])([H])C([H])([H])C([H])([H])C3([H])[H])N([H])[H])C3=C([H])N=C4C([H])=C([H])C([H])=C([H])N43)=C([H])N2C=1[H]	2.90665	5.418646	0.9230199999999992	5.48056786	0.1543783999999988	2.9573195
[H]C1N=C(Cl)C(C2C([H])=C([H])C3=NN([H])C([H])=C3C=2[H])=C(C=1C1=C2C(=NN1[H])C([H])=C([H])C([H])=C2[H])N([H])[H]	2.9846699999999995	6.094685	1.6634360000000001	6.09576335	0.8355611199999995	3.0220760999999996
[H]C1N=C(Cl)C(=C(C=1C1C([H])=C([H])C2=NN([H])C([H])=C2C=1[H])N([H])[H])C1=C2C(=NN1[H])C([H])=C([H])C([H])=C2[H]	2.89503	6.057739	1.7509279999999998	6.062142489999999	0.9160537599999996	2.9476749000000004
[H]C1=C([H])C(=C([H])C(=C1F)C1C([H])=C(C([H])=C2C(=O)C(=O)N([H])C=12)C1=C([H])C(F)=C([H])C([H])=C1N([H])[H])N([H])[H]	1.85006	6.1313580000000005	2.877008	6.12913578	1.95204736	2.0803498
[H]C1=C([H])C(=C([H])C(=C1F)C1=C([H])C(C2=C([H])C(F)=C([H])C([H])=C2N([H])[H])=C2C(C(=O)C(=O)N2[H])=C1[H])N([H])[H]	1.86583	6.071752999999998	2.879032	6.074895229999998	1.9539094399999999	2.0934389
[H]C1=C([H])C(=C([H])C(=C1[H])C([H])(C([H])([H])[H])C([H])([H])[H])C1C([H])=C(C([H])=C(OC(F)(F)F)C=1N=C=S)C1C([H])=C([H])C([H])=C([H])C=1C([H])(C([H])([H])[H])C([H])([H])[H]	3.42955	6.459868	2.000524	6.42807988	1.1456820800000003	3.3913265
[H]C1=C([H])C(=C([H])C(=C1[H])C([H])(C([H])([H])[H])C([H])([H])[H])C1C([H])=C(OC(F)(F)F)C(N=C=S)=C(C=1[H])C1C([H])=C([H])C([H])=C([H])C=1C([H])(C([H])([H])[H])C([H])([H])[H]	3.38805	6.567885	1.922968	6.52637535	1.07433056	3.3568815
[H]C1=C([H])C(C2=NC(C3C([H])=C([H])C([H])=C(Cl)C=3C([H])([H])[H])=C(N=C2Cl)N([H])[H])=C(Cl)C(=C1[H])C([H])([H])[H]	3.25442	6.4948120000000005	2.050848	6.45987892	1.19198016	3.2459686000000003
[H]C1=C([H])C(=C(Cl)C(=C1[H])C([H])([H])[H])C1N=C(C(Cl)=NC=1N([H])[H])C1C([H])=C([H])C([H])=C(Cl)C=1C([H])([H])[H]	3.2527599999999994	6.4681489999999995	2.0442240000000003	6.435615589999999	1.1858860800000004	3.2445907999999997
[H]C1=NC([H])=C(N=C1[H])C1=NC(=NN1[H])C1=NC([H])=C([H])N=C1[H]	3.0070799999999998	6.972289	2.349756	6.89438299	1.46697552	3.0406763999999997
[H]C1=NC([H])=C(N=C1[H])C1=NN([H])C(=N1)C1=NC([H])=C([H])N=C1[H]	3.00625	6.972653	2.34994	6.89471423	1.4671447999999998	3.0399875000000005
[H]C1N=C(C(=NC=1C1C(=NC(Cl)=C([H])C=1[H])N([H])[H])C1=C(Cl)N=C(C([H])=C1[H])N([H])[H])N(C([H])([H])[H])C([H])([H])[H]	2.78464	5.972108	1.9255439999999997	5.98421828	1.0767004799999995	2.8560512000000005
[H]C1N=C(C(=NC=1C1=C(Cl)N=C(C([H])=C1[H])N([H])[H])C1C(=NC(Cl)=C([H])C=1[H])N([H])[H])N(C([H])([H])[H])C([H])([H])[H]	3.02036	5.9812080000000005	1.8572800000000005	5.9924992800000005	1.0138976	3.0516988000000005
[H]C1C([H])=C(OC([H])([H])[H])C(=C(C=1Cl)C1C([H])=C(C(=O)Cl)C(=C([H])C=1C(=O)Cl)C1C([H])=C(OC([H])([H])[H])C(=C([H])C=1Cl)N([H])[H])N([H])[H]	2.4343800000000004	6.304076	3.177756	6.28630916	2.22873552	2.5653354000000004
[H]C1C([H])=C(OC([H])([H])[H])C(=C(C=1Cl)C1=C([H])C(C(=O)Cl)=C(C([H])=C1C(=O)Cl)C1C([H])=C(OC([H])([H])[H])C(=C([H])C=1Cl)N([H])[H])N([H])[H]	2.55556	6.280143	3.046196	6.26453013	2.10770032	2.6659148000000004
[H]C(=O)C1SC(=NC=1[H])C1C([H])=C(Cl)C(=C(C=1Cl)C1N=C([H])SC=1C([H])=O)N([H])[H]	2.7431400000000004	6.5217480000000005	2.828616	6.484390680000001	1.90752672	2.8216062000000006
[H]C(=O)C1SC(=NC=1[H])C1C(Cl)=C(C([H])=C(Cl)C=1N([H])[H])C1N=C([H])SC=1C([H])=O	2.53647	6.4599590000000005	2.842508	6.428162690000001	1.9203073599999998	2.6500701
[H]C1C([H])=C([H])C(=C(C=1[H])C1C([H])=C([H])C(=C([H])C=1C([H])([H])C([H])([H])[H])C1C([H])=C([H])C(=C([H])C=1[H])[N+](=O)[O-])[N+](=O)[O-]	3.10253	6.841431	2.429704	6.7753022099999995	1.5405276800000003	3.1198999
[H]C1C([H])=C([H])C(=C(C=1[H])C1C([H])=C([H])C(C2C([H])=C([H])C(=C([H])C=2[H])[N+](=O)[O-])=C(C=1[H])C([H])([H])C([H])([H])[H])[N+](=O)[O-]	3.03779	6.83588	2.466504	6.7702508	1.57438368	3.0661657000000004
[H]C1=C([H])C([H])=C(C([H])=C1[H])C([H])([H])N1N=C(N=C1C1C([H])=C([H])C([H])=C([H])C=1N([H])[H])C1C([H])=C([H])C([H])=C(C=1[H])N([H])[H]	2.87511	5.843161	1.2656279999999995	5.86687651	0.46957775999999907	2.9311413
[H]C1=C([H])C([H])=C(C([H])=C1[H])C([H])([H])N1N=C(N=C1C1C([H])=C([H])C([H])=C(C=1[H])N([H])[H])C1C([H])=C([H])C([H])=C([H])C=1N([H])[H]	3.1199599999999994	6.050459	1.1802520000000003	6.05551769	0.39103184000000013	3.1343667999999996
[H]C1N=C(C2=NSN=C2C=1C1C([H])=C([H])C([H])=C([H])C=1N=C=S)C1C([H])=C([H])C([H])=C(N=C=S)C=1[H]	2.56303	6.438392	3.5027	6.408536720000001	2.527684	2.6721149000000004
[H]C1N=C(C2=NSN=C2C=1C1C([H])=C([H])C([H])=C(N=C=S)C=1[H])C1C([H])=C([H])C([H])=C([H])C=1N=C=S	2.4368699999999994	6.433114	3.5426279999999997	6.40373374	2.5644177599999995	2.5674021
[H]C1=NN([H])C(C2C([H])=C(C3=NN([H])C([H])=C3[N+](=O)[O-])C([H])=C([H])C=2C(=O)OC([H])([H])[H])=C1[N+](=O)[O-]	3.27932	7.53567	2.804972	7.4070597	1.88577424	3.2666356
[H]C1=NN([H])C(C2C([H])=C([H])C(C(=O)OC([H])([H])[H])=C(C3=NN([H])C([H])=C3[N+](=O)[O-])C=2[H])=C1[N+](=O)[O-]	3.24446	7.544497	2.81822	7.41509227	1.8979624	3.2377018
[H]C1=C([H])C(=C(Cl)C([H])=C1F)C1C([H])=C([H])C(C2=C([H])C([H])=C(Cl)C([H])=C2F)=C(C=1[H])N([H])C(=S)C([H])([H])[H]	2.4343800000000004	5.991218	1.8001479999999999	6.00160838	0.9613361600000001	2.5653354000000004
[H]C1=C([H])C(=C(Cl)C([H])=C1F)C1C([H])=C([H])C(=C([H])C=1N([H])C(=S)C([H])([H])[H])C1=C([H])C([H])=C(Cl)C([H])=C1F	2.45513	6.006324	1.864548	6.0153548400000005	1.0205841600000003	2.5825579000000003
[H]SC1C([H])=C([H])C(=C([H])C=1[H])C1=C([H])N=C(C(C2C([H])=C([H])C([H])=C([H])C=2S[H])=C1C([H])([H])[H])N([H])[H]	3.50259	5.844253	0.8723280000000004	5.86787023	0.10774176000000057	3.4519497
[H]SC1C([H])=C([H])C(=C([H])C=1[H])C1C(=NC([H])=C(C2C([H])=C([H])C([H])=C([H])C=2S[H])C=1C([H])([H])[H])N([H])[H]	3.5415999999999994	5.8786510000000005	0.8215440000000003	5.89917241	0.06102047999999982	3.4843279999999996
[H]C1=NC(OC([H])([H])C2C([H])=C([H])C([H])=C([H])C=2[H])=C(C([H])=C1C1=NC(F)=C([H])N1C([H])([H])[H])C1=C(F)N=C([H])N1C([H])([H])[H]	3.11249	6.0312579999999985	1.360664	6.038044779999998	0.55701088	3.1281667000000004
[H]C1=NC(OC([H])([H])C2C([H])=C([H])C([H])=C([H])C=2[H])=C(C2=NC(F)=C([H])N2C([H])([H])[H])C([H])=C1C1=C(F)N=C([H])N1C([H])([H])[H]	3.0626900000000004	6.007143	1.3247839999999993	6.01610013	0.5240012799999993	3.0868327000000004
[H]C1N=C2C(=C([H])C(C3C([H])=C4OC([H])([H])C([H])([H])C(=O)C4=C([H])C=3[H])=C([H])N2C=1[H])C1C([H])=C([H])C([H])=C2OC([H])([H])C([H])([H])C(=O)C=12	2.7448	6.163208	2.090316	6.15811928	1.2282907200000004	2.8229840000000004
[H]C1N=C2C(=C([H])C(C3C([H])=C([H])C([H])=C4OC([H])([H])C([H])([H])C(=O)C=34)=C([H])N2C=1[H])C1C([H])=C2OC([H])([H])C([H])([H])C(=O)C2=C([H])C=1[H]	2.68338	6.159294999999999	2.008068	6.15455845	1.1526225600000002	2.7720054000000003
[H]C1=NC2C([H])=C(C([H])=C([H])C=2C([H])=C1[H])C1=C([H])C(C2=NC3C([H])=C([H])C([H])=C([H])C=3C([H])=C2[H])=C2C(=C1[H])C([H])([H])C([H])([H])C([H])([H])N2[H]	2.7995799999999997	5.603194	1.6376760000000001	5.6485065400000005	0.8118619200000001	2.8684513999999997
[H]C1=NC2C([H])=C(C([H])=C([H])C=2C([H])=C1[H])C1C([H])=C(C2=NC3C([H])=C([H])C([H])=C([H])C=3C([H])=C2[H])C([H])=C2C=1N([H])C([H])([H])C([H])([H])C2([H])[H]	2.76472	5.521385	1.6216679999999997	5.57406035	0.7971345599999999	2.8395176
[H]C1=C([H])C(=C(Cl)C(=C1[H])C(F)(F)F)C1C([H])=C([H])C(C(=O)N([H])[H])=C(C=1[H])C1=C([H])C([H])=C(Cl)C(=C1[H])C(F)(F)F	3.71009	6.9486289999999995	1.794168	6.872852389999999	0.9558345599999996	3.6241747
[H]C1=C([H])C(=C(Cl)C(=C1[H])C(F)(F)F)C1C([H])=C(C([H])=C([H])C=1C(=O)N([H])[H])C1=C([H])C([H])=C(Cl)C(=C1[H])C(F)(F)F	3.70594	6.891572	1.6842279999999998	6.82093052	0.8546897600000003	3.6207302
[H]C1=NC2C(OC([H])([H])[H])=C(C([H])=C([H])C=2C([H])=C1[H])C1=C([H])C(=C(Cl)C(=C1[H])C(F)(F)F)C1=C([H])C([H])=C(OC([H])([H])[H])C2N=C([H])C([H])=C([H])C=21	2.99546	6.246837	1.975776	6.23422167	1.1229139199999993	3.0310318
[H]C1=NC2C(OC([H])([H])[H])=C(C([H])=C([H])C=2C([H])=C1[H])C1C([H])=C(C([H])=C(C=1Cl)C(F)(F)F)C1=C([H])C([H])=C(OC([H])([H])[H])C2N=C([H])C([H])=C([H])C=21	2.93819	6.239193	1.9944520000000001	6.22726563	1.1400958399999999	2.9834977
[H]C1=NC(C2C([H])=C([H])C(C3=NC([H])=C([H])N4C3=NC([H])=C4[H])=C(Cl)C=2C([H])([H])[H])=C([H])N2C1=NC([H])=C2[H]	3.1183	6.427745	1.982768	6.39884795	1.12934656	3.1329890000000002
[H]C1=NC(C2C([H])=C([H])C(C3=NC([H])=C([H])N4C3=NC([H])=C4[H])=C(C=2Cl)C([H])([H])[H])=C([H])N2C1=NC([H])=C2[H]	3.16561	6.442577999999999	1.938792	6.41234598	1.0888886400000004	3.1722563
[H]C1=NN2C(=NC([H])=C2[H])C(C2=NC([H])=C3C(=N2)C([H])=C([H])C(C2=NN4C(=NC([H])=C4[H])C([H])=C2[H])=C3[H])=C1[H]	2.6775700000000002	6.500545000000002	2.6608080000000003	6.465095950000002	1.7531433600000002	2.7671831000000005
[H]C1=NN2C(=NC([H])=C2[H])C(=C1[H])C1C([H])=C([H])C2=NC(=NC([H])=C2C=1[H])C1=NN2C(=NC([H])=C2[H])C([H])=C1[H]	2.62445	6.482618	2.73542	6.448782380000001	1.8217863999999997	2.7230935
[H]C1=C([H])C(C2=C([H])C(=C(C([H])=C2C([H])([H])[H])C2=C([H])C([H])=C3C(C(=O)C(=O)N3[H])=C2[H])C([H])([H])[H])=C2C(C(=O)C(=O)N2[H])=C1[H]	1.88326	6.5095540000000005	2.8518920000000003	6.47329414	1.9289406400000004	2.1079058
[H]C1=C([H])C(C2C([H])=C(C(=C([H])C=2C([H])([H])[H])C2=C([H])C([H])=C3C(C(=O)C(=O)N3[H])=C2[H])C([H])([H])[H])=C2C(C(=O)C(=O)N2[H])=C1[H]	1.89073	6.482163	2.848028	6.44836833	1.9253857599999997	2.1141059
[H]C1=NC(C2=C([H])C(C3=NC([H])=C([H])N4C3=NC([H])=C4[H])=C3C(=O)C(=O)N([H])C3=C2[H])=C([H])N2C1=NC([H])=C2[H]	1.80441	6.681089	3.1669920000000005	6.62939099	2.2188326400000005	2.0424603
[H]C1=NC(C2C([H])=C(C3=NC([H])=C([H])N4C3=NC([H])=C4[H])C([H])=C3C=2C(=O)C(=O)N3[H])=C([H])N2C1=NC([H])=C2[H]	1.7761900000000002	6.648510999999999	3.0748080000000004	6.5997450099999995	2.1340233600000005	2.0190377
[H]C1=C([H])C([H])=C(C([H])=C1[H])C([H])([H])N1N=C(N=C1C1C([H])=C([H])C([H])=C([H])C=1Cl)C1C([H])=C([H])C(Cl)=C([H])C=1[H]	3.5689900000000003	6.615751	1.5056559999999999	6.569933410000001	0.6904035200000003	3.5070617000000004
[H]C1=C([H])C([H])=C(C([H])=C1[H])C([H])([H])N1N=C(N=C1C1C([H])=C([H])C(Cl)=C([H])C=1[H])C1C([H])=C([H])C([H])=C([H])C=1Cl	3.68685	6.722858	1.39268	6.6674007799999995	0.5864655999999995	3.6048855000000004
[H]C1=C([H])C(F)=C(C([H])=C1F)C1C(=NC(F)=C(C=1[H])C1=C([H])C(F)=C([H])C([H])=C1F)C([H])([H])[H]	3.69349	6.793747	1.615044	6.73190977	0.7910404800000004	3.6103967000000003
[H]C1=C([H])C(F)=C(C([H])=C1F)C1=C(F)N=C(C(=C1[H])C1=C([H])C(F)=C([H])C([H])=C1F)C([H])([H])[H]	3.63539	6.794202	1.64568	6.73232382	0.8192256000000002	3.5621737
[H]C(=O)C1=C([H])C([H])=C(C([H])=O)C(=C1[H])C1C(=NC([H])=C(C=1OC([H])([H])[H])C1C([H])=C(C([H])=O)C([H])=C([H])C=1C([H])=O)N([H])[H]	2.53398	6.413003	2.872868	6.38543273	1.94823856	2.6480034000000003
[H]C(=O)C1=C([H])C([H])=C(C([H])=O)C(=C1[H])C1=C([H])N=C(C(=C1OC([H])([H])[H])C1C([H])=C(C([H])=O)C([H])=C([H])C=1C([H])=O)N([H])[H]	2.5422800000000003	6.417553	2.8495	6.38957323	1.9267399999999997	2.6548924000000005
[H]C1=NN(C(=N1)C1SC(=NC=1[H])C1=NN(C([H])=N1)C([H])([H])C1C([H])=C([H])C([H])=C([H])C=1[H])C([H])([H])C1C([H])=C([H])C([H])=C([H])C=1[H]	2.88424	6.385521	2.0702599999999998	6.36042411	1.2098391999999993	2.9387192000000004
[H]C1=NN(C(=N1)C1=NC([H])=C(S1)C1=NN(C([H])=N1)C([H])([H])C1C([H])=C([H])C([H])=C([H])C=1[H])C([H])([H])C1C([H])=C([H])C([H])=C([H])C=1[H]	2.84523	6.415915	2.011564	6.38808265	1.1558388800000001	2.9063409
[H]C(=O)C1=C([H])C(=C([H])C([H])=C1OC([H])(C([H])([H])[H])C([H])([H])[H])C1C([H])=C(F)C(Cl)=C(C2C([H])=C([H])C([H])=C(C([H])=O)C=2OC([H])(C([H])([H])[H])C([H])([H])[H])C=1N([H])[H]	2.71575	6.364045	2.119204	6.34088095	1.2548676799999994	2.7988725
[H]C(=O)C1=C([H])C(=C([H])C([H])=C1OC([H])(C([H])([H])[H])C([H])([H])[H])C1=C(Cl)C(F)=C([H])C(C2C([H])=C([H])C([H])=C(C([H])=O)C=2OC([H])(C([H])([H])[H])C([H])([H])[H])=C1N([H])[H]	2.73152	6.351942	2.145884	6.329867220000001	1.27941328	2.8119616
[H]C1=C([H])C(C2=NC(=C(C3=C([H])C([H])=C(C(=C3[H])[N+]([O-])=NC([H])([H])[H])N([H])[H])N2C([H])([H])[H])C([H])([H])[H])=C(C(=C1[H])[N+]([O-])=NC([H])([H])[H])N([H])[H]	2.58212	5.808763	1.9891159999999999	5.83557433	1.13518672	2.6879596
[H]C1=C([H])C(=C(C(=C1[H])[N+]([O-])=NC([H])([H])[H])N([H])[H])C1=C(N=C(C2=C([H])C([H])=C(C(=C2[H])[N+]([O-])=NC([H])([H])[H])N([H])[H])N1C([H])([H])[H])C([H])([H])[H]	2.64105	5.838247	1.982216	5.8624047699999995	1.12883872	2.7368715000000003
[H]C1=NC([H])=C(N=C1C(=O)C([H])([H])[H])C1N=C(C(=NC=1[H])C1=NC([H])=C([H])N=C1C(=O)C([H])([H])[H])N([H])[H]	2.25842	6.577895	3.084192	6.53548445	2.14265664	2.4192886000000002
[H]C1=NC([H])=C(N=C1C(=O)C([H])([H])[H])C1=NC([H])=C(N=C1N([H])[H])C1=NC([H])=C([H])N=C1C(=O)C([H])([H])[H]	2.39454	6.6536979999999994	2.848028	6.60446518	1.9253857599999997	2.5322682000000003
[H]C1=NN([H])C2=C([H])C(=C([H])C([H])=C12)C1=C(C([H])=C([H])C(C2C([H])=C([H])C([H])=C3C=2C([H])=NN3[H])=C1C([H])([H])[H])C([H])([H])[H]	3.3996699999999995	6.2281819999999986	1.0535680000000005	6.217245619999998	0.27448256000000004	3.3665260999999997
[H]C1=NN([H])C2=C([H])C(=C([H])C([H])=C12)C1C([H])=C([H])C(=C(C2C([H])=C([H])C([H])=C3C=2C([H])=NN3[H])C=1C([H])([H])[H])C([H])([H])[H]	3.4619199999999988	6.1987890000000005	1.0370080000000002	6.190497990000001	0.2592473599999998	3.418193599999999
[H]C1=NN2C(=N1)C(=C([H])C(C1C([H])=C([H])C([H])=C3C(=O)C(=O)N([H])C=13)=C2[H])C1=C([H])C([H])=C2C(C(=O)C(=O)N2[H])=C1[H]	1.84757	6.6322220000000005	3.0171240000000004	6.5849220200000005	2.0809540800000006	2.0782831
[H]C1=NN2C(=N1)C(=C([H])C(C1=C([H])C([H])=C3C(C(=O)C(=O)N3[H])=C1[H])=C2[H])C1C([H])=C([H])C([H])=C2C(=O)C(=O)N([H])C=12	1.87828	6.548684	3.007096	6.50890244	2.07172832	2.1037724000000004
[H]C1=NC(C2C3=NC([H])=C(C4=NC([H])=C(N4[H])C([H])([H])[H])N3C([H])=C(Cl)C=2[H])=C(N1[H])C([H])([H])[H]	2.61532	5.5516879999999995	1.527368	5.60163608	0.7103785599999997	2.7155156000000003
[H]C1N=C2C(C3=NC(C4=C([H])N=C5C([H])=C([H])C(Cl)=C([H])N54)=C(N3[H])C([H])([H])[H])=C([H])C(Cl)=C([H])N2C=1[H]	2.8195	5.487715000000001	1.1439119999999994	5.543420650000001	0.3575990399999993	2.8849850000000004
[H]C(=O)C1=C([H])C([H])=C(C([H])=C1F)C1=C([H])C(=C(Cl)C(=C1N([H])[H])C([H])([H])[H])C1C([H])=C([H])C([H])=C(F)C=1C([H])=O	2.66512	6.25166	2.220312	6.2386106	1.3478870399999998	2.7568496
[H]C(=O)C1=C([H])C([H])=C(C([H])=C1F)C1C([H])=C(C2C([H])=C([H])C([H])=C(F)C=2C([H])=O)C(=C(C=1Cl)C([H])([H])[H])N([H])[H]	2.85685	6.2092540000000005	2.2617119999999997	6.2000211400000005	1.38597504	2.9159855000000006
[H]C1=C([H])C(=C(Cl)C(=C1[H])C(F)(F)F)C1C(=C([H])C(=C([H])C=1C([H])([H])C([H])([H])[H])C1=C([H])C([H])=C(Cl)C(=C1[H])C(F)(F)F)C([H])([H])C([H])([H])[H]	3.7325	6.838882999999999	1.3355480000000002	6.772983529999999	0.5339041599999996	3.6427750000000003
[H]C1=C([H])C(=C(Cl)C(=C1[H])C(F)(F)F)C1=C([H])C(=C(C2=C([H])C([H])=C(Cl)C(=C2[H])C(F)(F)F)C(=C1[H])C([H])([H])C([H])([H])[H])C([H])([H])C([H])([H])[H]	3.66278	6.734506	1.4679360000000001	6.67800046	0.6557011199999998	3.5849074000000005
[H]C1=NC(F)=C(C([H])=C1C1=C([H])C([H])=C(C(C(=O)C([H])([H])[H])=C1[H])N([H])C(=O)C([H])([H])[H])C1C([H])=C([H])C([H])=C(C(=O)C([H])([H])[H])C=1N([H])C(=O)C([H])([H])[H]	2.83195	6.79675	2.1319	6.7346425	1.2665480000000002	2.8953185
[H]C1=NC(F)=C(C([H])=C1C1C([H])=C([H])C([H])=C(C(=O)C([H])([H])[H])C=1N([H])C(=O)C([H])([H])[H])C1=C([H])C([H])=C(C(C(=O)C([H])([H])[H])=C1[H])N([H])C(=O)C([H])([H])[H]	2.6867	6.727499000000001	2.1429400000000003	6.671624090000001	1.2767048	2.7747610000000003
[H]C1=NC([H])=C(C2=NC(C3=NC([H])=C([H])C([H])=C3[N+](=O)[O-])=C([H])C3=C([H])C([H])=C([H])C([H])=C23)C([H])=C1[N+](=O)[O-]	2.9597700000000002	6.65297	2.728152	6.603802699999999	1.8150998400000002	3.0014091
[H]C1=NC([H])=C(C([H])=C1[N+](=O)[O-])C1N=C(C2=NC([H])=C([H])C([H])=C2[N+](=O)[O-])C2=C([H])C([H])=C([H])C([H])=C2C=1[H]	3.135730000000001	6.693828999999999	2.5920840000000003	6.64098439	1.6899172800000004	3.147455900000001
[H]C1=C([H])C(C2C([H])=C(Cl)C(F)=C(C=2[H])C2=C([H])C([H])=C3C(=C2[H])C([H])=C([H])N3[H])=C2C(=C1[H])C([H])=C([H])N2[H]	3.2569099999999995	5.928246	1.11484	5.94430386	0.3308527999999997	3.2480352999999997
[H]C1=C([H])C(C2C([H])=C(C([H])=C(Cl)C=2F)C2=C([H])C([H])=C3C(=C2[H])C([H])=C([H])N3[H])=C2C(=C1[H])C([H])=C([H])N2[H]	3.3764300000000005	5.928974	1.1278119999999996	5.944966340000001	0.34278703999999927	3.3472369000000004
[H]C1N=C(F)C(C2C([H])=C(OC([H])([H])[H])C(=C(C=2[H])C2=C([H])N=C(F)C([H])=C2C([H])([H])[H])N([H])[H])=C(C=1[H])C([H])([H])[H]	3.23533	5.744972	1.10426	5.77752452	0.32111920000000005	3.2301238999999997
[H]C1N=C(F)C(C2C([H])=C(C([H])=C(OC([H])([H])[H])C=2N([H])[H])C2=C([H])N=C(F)C([H])=C2C([H])([H])[H])=C(C=1[H])C([H])([H])[H]	3.2212199999999998	5.772544999999999	1.1160360000000005	5.802615949999999	0.33195311999999966	3.2184125999999997
[H]C1=NC(=C([H])N=C1N(C([H])([H])[H])C([H])([H])[H])C1C([H])=C([H])N=C2C([H])=C(C3=NC([H])=C([H])N=C3N(C([H])([H])[H])C([H])([H])[H])C([H])=C([H])C=12	2.63109	6.097142	2.135764	6.09799922	1.2701028799999996	2.7286047
[H]C1=NC(=C([H])N=C1N(C([H])([H])[H])C([H])([H])[H])C1C([H])=C([H])C2C(=NC([H])=C([H])C=2C2=NC([H])=C([H])N=C2N(C([H])([H])[H])C([H])([H])[H])C=1[H]	2.9116299999999997	6.089589	2.1283119999999998	6.09112599	1.2632470399999995	2.9614529
[H]C1=NC([H])=C([H])C(C2C([H])=C(C3=NC([H])=C([H])C([H])=C3[N+](=O)[O-])C(F)=C([H])C=2Cl)=C1[N+](=O)[O-]	3.03032	7.4150040000000015	2.888968	7.297253640000001	1.96305056	3.0599656
[H]C1=NC([H])=C([H])C(C2=C([H])C(C3=NC([H])=C([H])C([H])=C3[N+](=O)[O-])=C(Cl)C([H])=C2F)=C1[N+](=O)[O-]	2.93155	7.396803999999999	2.8499600000000003	7.280691639999999	1.9271631999999999	2.9779865
[H]C1N=C2C(=NC([H])=C(C3=C(F)C([H])=C(F)C([H])=C3N([H])[H])N2C=1[H])C1C(F)=C([H])C(=C([H])C=1F)N([H])[H]	2.69251	5.960187	1.84256	5.973370170000001	1.0003551999999996	2.7795833
[H]C1N=C2C(=NC([H])=C(C3C(F)=C([H])C(=C([H])C=3F)N([H])[H])N2C=1[H])C1=C(F)C([H])=C(F)C([H])=C1N([H])[H]	2.9464900000000003	6.10879	1.7597599999999998	6.1085989000000005	0.9241792000000002	2.9903867
[H]C1=NN([H])C(=N1)C1C([H])=C([H])C(C2=NN([H])C([H])=N2)=C(Cl)C=1C([H])([H])[H]	3.28015	6.655427	1.7896599999999996	6.606038570000001	0.9516871999999994	3.2673245
[H]C1=NN([H])C(=N1)C1C([H])=C([H])C(C2=NN([H])C([H])=N2)=C(C=1Cl)C([H])([H])[H]	3.2701900000000004	6.632403999999999	1.7638999999999996	6.585087639999999	0.9279879999999991	3.2590577000000005
[H]C1=NC2=C([H])C(=C(C([H])=C2N1[H])C1=C([H])C(=C(C([H])=C1C([H])([H])[H])C1=C2N=C([H])N([H])C2=C([H])C([H])=C1N([H])[H])C([H])([H])[H])N([H])[H]	3.04028	5.703749	1.0785919999999996	5.74001159	0.29750463999999965	3.0682324000000003
[H]C1=NC2=C([H])C(=C(C([H])=C2N1[H])C1C([H])=C(C(=C([H])C=1C([H])([H])[H])C1=C2N=C([H])N([H])C2=C([H])C([H])=C1N([H])[H])C([H])([H])[H])N([H])[H]	3.09091	5.7006549999999985	1.092116	5.737196049999999	0.3099467200000001	3.1102553000000004
[H]C1=C([H])C(=C(C([H])=C1C1=C([H])C(=C([H])C([H])=C1C([H])([H])[H])[N+](=O)[O-])C1C([H])=C(C([H])=C([H])C=1[N+](=O)[O-])C([H])([H])[H])C(F)(F)F	3.00376	7.291517	2.5217959999999997	7.1848804699999995	1.6252523199999995	3.0379208
[H]C1C([H])=C([H])C(=C(C=1[H])C1=C([H])C(=C(C([H])=C1C([H])([H])[H])C1C([H])=C([H])C(=C([H])C=1[H])C(F)(F)F)[N+](=O)[O-])C(F)(F)F	3.05107	7.265582000000001	2.539184	7.161279620000001	1.6412492800000003	3.0771881000000003
[H]C1=NN(C(=N1)C1C([H])=NC2=NN([H])C(C3=NN(C([H])=N3)C([H])([H])C3C([H])=C([H])C([H])=C([H])C=3[H])=C2C=1[H])C([H])([H])C1C([H])=C([H])C([H])=C([H])C=1[H]	2.8477200000000003	6.3917090000000005	2.098504	6.366055190000001	1.2358236800000002	2.9084076000000003
[H]C1=NN(C(=N1)C1=C2C(N=C([H])C(C3=NN(C([H])=N3)C([H])([H])C3C([H])=C([H])C([H])=C([H])C=3[H])=C2[H])=NN1[H])C([H])([H])C1C([H])=C([H])C([H])=C([H])C=1[H]	2.84357	6.429656	2.0146919999999997	6.40058696	1.1587166399999997	2.9049631000000002
[H]C1=C([H])C(=C([H])C(=C1Cl)C1=C([H])C(C2=C([H])C(Cl)=C([H])C([H])=C2C([H])([H])[H])=C2C([H])=C([H])N([H])C2=C1[H])C([H])([H])[H]	3.4735400000000003	5.7975699999999994	0.9923879999999999	5.8253886999999995	0.21819696000000022	3.4278382
[H]C1=C([H])C(=C([H])C(=C1Cl)C1C([H])=C(C([H])=C2C=1C([H])=C([H])N2[H])C1=C([H])C(Cl)=C([H])C([H])=C1C([H])([H])[H])C([H])([H])[H]	3.48184	5.819228	0.9937680000000002	5.84509748	0.21946655999999987	3.4347272
[H]C1=C([H])C(C2=C([H])C(=C(OC([H])([H])[H])C([H])=C2C([H])([H])[H])C2C([H])=C(OC([H])([H])[H])C(=C([H])C=2[H])N([H])[H])=C(C(OC([H])([H])[H])=C1[H])N([H])[H]	3.2461199999999995	5.64924	1.252656	5.6904084	0.4576435199999995	3.2390795999999997
[H]C1=C([H])C(C2C([H])=C(C3C([H])=C(OC([H])([H])[H])C(=C([H])C=3[H])N([H])[H])C(=C([H])C=2OC([H])([H])[H])C([H])([H])[H])=C(C(OC([H])([H])[H])=C1[H])N([H])[H]	3.3183300000000004	5.577805000000001	1.1452	5.6254025500000004	0.358784	3.2990139000000003
[H]C1C([H])=C([H])C(=C(C=1[H])C1=C([H])C(C2C([H])=C([H])C(=C([H])C=2[H])C(F)(F)F)=C(C(=C1[H])C([H])(C([H])([H])[H])C([H])([H])[H])N([H])[H])C(F)(F)F	3.3780900000000003	5.88766	1.562052	5.9073706	0.7422878399999995	3.3486147000000006
[H]C1C([H])=C([H])C(=C(C=1[H])C1C([H])=C(C([H])=C(C=1N([H])[H])C([H])(C([H])([H])[H])C([H])([H])[H])C1C([H])=C([H])C(=C([H])C=1[H])C(F)(F)F)C(F)(F)F	3.13407	5.9508139999999985	1.597932	5.964840739999999	0.7752974400000001	3.1460781
[H]C1=NN2C(=N1)C(C1=NC(=C(F)C([H])=C1[H])C1C([H])=C([H])C3=NC([H])=NN3C=1[H])=C([H])C([H])=C2[H]	3.17557	6.502274	1.82968	6.46666934	0.9885055999999999	3.1805231000000003
[H]C1=NN2C(=N1)C(=C([H])C([H])=C2[H])C1N=C(C([H])=C([H])C=1F)C1C([H])=C([H])C2=NC([H])=NN2C=1[H]	3.15233	6.550140000000002	1.96722	6.5102274000000016	1.1150424	3.1612339
[H]C1=NC(=C(OC([H])([H])[H])C([H])=C1[N+](=O)[O-])C1C([H])=C(F)C(Cl)=C(C2=NC([H])=C(OC([H])([H])[H])C([H])=C2[N+](=O)[O-])C=1[H]	2.6269400000000003	6.952178	2.9357040000000003	6.87608198	2.00604768	2.7251602000000004
[H]C1=NC(=C(OC([H])([H])[H])C([H])=C1[N+](=O)[O-])C1C([H])=C(C2=NC([H])=C(OC([H])([H])[H])C([H])=C2[N+](=O)[O-])C([H])=C(F)C=1Cl	2.7016400000000003	6.949903	3.010776	6.874011729999999	2.0751139199999997	2.7871612000000003
[H]C1=C([H])C([H])=C(C(=S)N([H])C2C([H])=C(C([H])=C([H])C=2[H])C2=C([H])C(=NC(C3C([H])=C([H])C([H])=C([H])C=3N([H])C(=S)C3C([H])=C([H])C([H])=C([H])C=3[H])=C2N([H])[H])C([H])([H])[H])C([H])=C1[H]	2.27751	5.995222	2.269992	6.00525202	1.3935926399999996	2.4351333
[H]C1=C([H])C([H])=C(C(=S)N([H])C2C([H])=C(C([H])=C([H])C=2[H])C2N=C(C([H])=C(C3C([H])=C([H])C([H])=C([H])C=3N([H])C(=S)C3C([H])=C([H])C([H])=C([H])C=3[H])C=2N([H])[H])C([H])([H])[H])C([H])=C1[H]	2.2293699999999994	5.960824	2.216632	5.9739498399999995	1.3445014400000002	2.3951770999999997
[H]C1=NC2C(C([H])=C1[H])=C([H])C([H])=C([H])C=2C1C([H])=C(C([H])=C(C=1N([H])[H])[N+]([O-])=NC(C([H])([H])[H])(C([H])([H])[H])C([H])([H])[H])C1C([H])=C([H])C([H])=C2N=C([H])C([H])=C([H])C=12	2.66346	5.972017	2.0750439999999997	5.98413547	1.21424048	2.7554718000000005
[H]C1=NC2C(C([H])=C1[H])=C([H])C([H])=C([H])C=2C1=C([H])C(C2C([H])=C([H])C([H])=C3N=C([H])C([H])=C([H])C=23)=C(C(=C1[H])[N+]([O-])=NC(C([H])([H])[H])(C([H])([H])[H])C([H])([H])[H])N([H])[H]	2.66512	6.079397	2.146528	6.0818512700000005	1.2800057599999999	2.7568496
[H]C1=C(F)C(=C([H])C(=C1C1C([H])=C(C([H])=C(C=1C([H])([H])[H])C([H])([H])[H])C1=C(C(F)=C([H])C([H])=C1C(F)(F)F)N([H])[H])C(F)(F)F)N([H])[H]	3.2502699999999995	6.147373999999999	1.664724	6.143710339999999	0.8367460800000002	3.2425241
[H]C1=C(F)C(=C([H])C(=C1C1=C([H])C(C2=C(C(F)=C([H])C([H])=C2C(F)(F)F)N([H])[H])=C(C(=C1[H])C([H])([H])[H])C([H])([H])[H])C(F)(F)F)N([H])[H]	3.21624	6.166939	1.8172599999999999	6.16151449	0.9770792000000004	3.2142792
[H]C1C([H])=C([H])C(=C(N=C=S)C=1[H])C1=C(F)C(Cl)=C([H])C(C2C([H])=C([H])C(N=C=S)=C([H])C=2[H])=C1N([H])[H]	3.1996400000000005	6.174765	1.7396120000000002	6.168636149999999	0.9056430400000002	3.2005012000000006
[H]C1C([H])=C([H])C(=C(N=C=S)C=1[H])C1C([H])=C(Cl)C(F)=C(C2C([H])=C([H])C(N=C=S)=C([H])C=2[H])C=1N([H])[H]	3.20379	6.1783139999999985	1.7069519999999998	6.1718657399999985	0.8755958399999999	3.2039457000000002
[H]C1N=C(C([H])=C(C=1[H])C1SC(C2N=C(C([H])=C([H])C=2[H])C([H])([H])[H])=C(C=1[H])C([H])([H])C([H])([H])C([H])([H])C([H])([H])[H])C([H])([H])[H]	2.80705	6.081944999999999	1.863536	6.08416995	1.01965312	2.8746514999999997
[H]C1N=C(C([H])=C(C=1[H])C1SC(=C([H])C=1C([H])([H])C([H])([H])C([H])([H])C([H])([H])[H])C1N=C(C([H])=C([H])C=1[H])C([H])([H])[H])C([H])([H])[H]	2.7804900000000004	6.0530979999999985	1.9364920000000003	6.057919179999999	1.0867726400000004	2.8526067000000004
[H]C(=O)C1C([H])=C(C([H])=C([H])C=1C1C([H])=C([H])C([H])=C(C(=O)Cl)C=1[H])C1C([H])=C(C(=O)Cl)C([H])=C([H])C=1[H]	2.8684699999999994	6.988305	2.434948	6.90895755	1.5453521599999998	2.9256300999999993
[H]C(=O)C1C([H])=C(C([H])=C([H])C=1C1C([H])=C(C(=O)Cl)C([H])=C([H])C=1[H])C1C([H])=C([H])C([H])=C(C(=O)Cl)C=1[H]	2.89005	6.979205	2.424828	6.90067655	1.5360417599999998	2.9435415000000003
[H]C1C(=NC2C([H])=C(C([H])=C([H])C=2C=1[H])C1=C([H])C(Cl)=C([H])C([H])=C1F)C1C([H])=C(F)C([H])=C([H])C=1Cl	3.2594	6.6469640000000005	2.14708	6.598337240000001	1.2805136	3.250102
[H]C1=NC2C([H])=C(C([H])=C([H])C=2C([H])=C1[H])C1C([H])=C(F)C(C2=NC3C([H])=C([H])C([H])=C([H])C=3C([H])=C2[H])=C([H])C=1Cl	3.26853	6.6112920000000015	2.143768	6.565875720000001	1.2774665599999997	3.2576799000000003
[H]C1=C([H])C(=C(Cl)C(=C1[H])C(F)(F)F)C1N=C(C([H])=C(C=1[H])C1=C([H])C([H])=C(Cl)C(=C1[H])C(F)(F)F)N([H])[H]	3.1598	6.312994000000001	1.7749400000000002	6.2944245400000005	0.9381447999999999	3.167434
[H]C1=C([H])C(=C(Cl)C(=C1[H])C(F)(F)F)C1C([H])=C(N=C(C=1[H])N([H])[H])C1=C([H])C([H])=C(Cl)C(=C1[H])C(F)(F)F	3.24446	6.314996000000002	1.7446720000000002	6.296246360000001	0.9102982400000004	3.2377018
[H]C1=NC([H])=C([H])C2=C1N=C(C([H])=C2C1C([H])=C([H])C(=C([H])C=1C([H])([H])[H])N([H])[H])C1=C(C([H])=C([H])C([H])=C1C([H])([H])[H])N([H])[H]	3.02036	6.019792	2.040452	6.02761072	1.18241584	3.0516988000000005
[H]C1=NC([H])=C([H])C2=C1N=C(C([H])=C2C1=C(C([H])=C([H])C([H])=C1C([H])([H])[H])N([H])[H])C1C([H])=C([H])C(=C([H])C=1C([H])([H])[H])N([H])[H]	2.9597700000000002	5.953635	2.026008	5.967407850000001	1.16912736	3.0014091
[H]C1=NN2C(=N1)C([H])=C(C([H])=C2[H])C1C([H])=C(C2=NN3C(=N2)C([H])=C([H])C([H])=C3[H])C([H])=C(C=1Cl)C(F)(F)F	3.4776900000000004	6.729956	1.890216	6.67385996	1.0441987199999998	3.4312827000000006
[H]C1=NN2C(=N1)C([H])=C(C([H])=C2[H])C1=C([H])C(C2=NN3C(=N2)C([H])=C([H])C([H])=C3[H])=C(Cl)C(=C1[H])C(F)(F)F	3.5167	6.785466	1.8605919999999998	6.724374060000001	1.0169446399999993	3.463661
[H]C1N=C2C(=C([H])C(Cl)=C([H])N2C=1C1C([H])=C([H])C([H])=C2C=1C(=O)C(=O)N2[H])C1=C([H])C([H])=C2C(=O)C(=O)N([H])C2=C1[H]	1.81022	6.400809	3.0068200000000003	6.374336189999999	2.0714744000000005	2.0472826000000004
[H]C1N=C2C(=C([H])C(Cl)=C([H])N2C=1C1=C([H])C([H])=C2C(=O)C(=O)N([H])C2=C1[H])C1C([H])=C([H])C([H])=C2C=1C(=O)C(=O)N2[H]	1.8235	6.4059050000000015	3.0467480000000005	6.378973550000001	2.10820816	2.0583050000000003
[H]C1=NN([H])C2=C([H])C(=C([H])C(=C12)C1C([H])=C(F)C(=C([H])C=1C(F)(F)F)N([H])[H])C1=C(C(F)=C([H])C([H])=C1C(F)(F)F)N([H])[H]	3.1539900000000003	6.066839	1.6438400000000002	6.07042349	0.8175327999999995	3.1626117000000002
[H]C1=NN([H])C2=C([H])C(=C([H])C(=C12)C1=C(C(F)=C([H])C([H])=C1C(F)(F)F)N([H])[H])C1C([H])=C(F)C(=C([H])C=1C(F)(F)F)N([H])[H]	3.19881	6.070933999999999	1.615228	6.07414994	0.7912097600000001	3.1998123
[H]C1=NC([H])=C(C2=NN(C(=N2)C2=NC([H])=C([H])C([H])=C2F)C2([H])OC([H])([H])C([H])([H])C([H])([H])C2([H])[H])C([H])=C1F	3.28596	6.901217999999999	1.988932	6.82970838	1.1350174400000004	3.2721468000000002
[H]C1=NC([H])=C(C2=NC(=NN2C2([H])OC([H])([H])C([H])([H])C([H])([H])C2([H])[H])C2=NC([H])=C([H])C([H])=C2F)C([H])=C1F	3.19632	6.854261999999999	2.11442	6.78697842	1.2504663999999996	3.1977456
[H]C1=NC([H])=C(Cl)C(=C1[H])C1=C(N=C([H])C(C2=NC([H])=C(Cl)C([H])=C2[H])=C1[H])OC([H])([H])C1C([H])=C([H])C([H])=C([H])C=1[H]	3.44864	6.606833	1.919656	6.5618180299999995	1.0712835199999997	3.4071712000000005
[H]C1=NC([H])=C(Cl)C(=C1[H])C1C([H])=NC(OC([H])([H])C2C([H])=C([H])C([H])=C([H])C=2[H])=C(C2=NC([H])=C(Cl)C([H])=C2[H])C=1[H]	3.48931	6.615933	1.885984	6.57009903	1.04030528	3.4409273000000002
[H]C1=NC([H])=C(C2C([H])=C(C([H])=NC=2C([H])([H])[H])C2=NC([H])=C([H])N3C2=NC([H])=C3[H])N2C1=NC([H])=C2[H]	2.7124300000000003	6.4242870000000005	2.1526	6.395701170000001	1.2855920000000003	2.7961169000000003
[H]C1=NC([H])=C(C2C([H])=NC(=C(C3=NC([H])=C([H])N4C3=NC([H])=C4[H])C=2[H])C([H])([H])[H])N2C1=NC([H])=C2[H]	2.73982	6.437027	2.090316	6.4072945699999995	1.2282907200000004	2.8188506
[H]C1=NC(C#N)=C(C([H])=C1[H])C1C(Cl)=C([H])C(C2C([H])=NC(C#N)=C([H])C=2[H])=C(C=1Cl)C([H])([H])[H]	3.52915	7.0880410000000005	2.2290520000000003	6.99971731	1.3559278400000006	3.4739945
[H]C1=NC(C#N)=C(C([H])=C1[H])C1C([H])=C(Cl)C(=C(Cl)C=1C([H])([H])[H])C1C([H])=NC(C#N)=C([H])C=1[H]	3.59389	7.0628340000000005	2.22528	6.976778940000001	1.3524576000000001	3.5277287
[H]C1=C([H])C(=C(Cl)C(=C1[H])C([H])([H])[H])C1C([H])=C(C([H])=C(C=1N([H])[H])[N+]([O-])=NC([H])([H])[H])C1C([H])=C([H])C([H])=C(Cl)C=1C([H])([H])[H]	2.8825800000000004	6.223268	1.7632560000000002	6.21277388	0.9273955200000001	2.9373414
[H]C1=C([H])C(=C(Cl)C(=C1[H])C([H])([H])[H])C1=C([H])C(C2C([H])=C([H])C([H])=C(Cl)C=2C([H])([H])[H])=C(C(=C1[H])[N+]([O-])=NC([H])([H])[H])N([H])[H]	2.55058	6.210164	2.042476	6.20084924	1.1842779200000004	2.6617814
[H]C1=C([H])C(Cl)=C(C([H])=C1F)C1=C(Cl)N=C(C(=C1[H])C1=C([H])C(Cl)=C([H])C([H])=C1F)N([H])[H]	3.5274900000000002	6.356401	1.5301280000000002	6.33392491	0.7129177599999998	3.4726167000000006
[H]C1=C([H])C(Cl)=C(C([H])=C1F)C1C(=NC(Cl)=C(C=1[H])C1=C([H])C(Cl)=C([H])C([H])=C1F)N([H])[H]	3.3656399999999995	6.3089900000000005	1.6066719999999997	6.290780900000001	0.78333824	3.3382812
[H]C1SC(=C(C=1[H])C1C([H])=C(C([H])=C2C(=O)C(=O)N(C=12)C([H])([H])C([H])([H])[H])C1SC(=C([H])C=1[H])C([H])([H])[H])C([H])([H])[H]	1.80939	6.1117930000000005	2.839932	6.1113316300000005	1.9179374400000002	2.0465937000000003
[H]C1SC(=C(C=1[H])C1=C([H])C(C2SC(=C([H])C=2[H])C([H])([H])[H])=C2C(C(=O)C(=O)N2C([H])([H])C([H])([H])[H])=C1[H])C([H])([H])[H]	1.61434	6.0503680000000015	2.83754	6.055434880000002	1.9157368000000004	1.8847022000000004
[H]C1C(=O)N(C(=C(C=1[H])C1C([H])=C([H])C(=C2SC(=NC=12)C1C([H])=C([H])C([H])=C([H])C=1[H])C1C(=O)N(C(=C([H])C=1[H])C([H])([H])[H])C([H])([H])[H])C([H])([H])[H])C([H])([H])[H]	2.84606	5.864091	1.992336	5.88592281	1.1381491199999996	2.9070298
[H]C1C(=O)N(C(=C(C=1[H])C1C([H])=C([H])C(=C2N=C(SC=12)C1C([H])=C([H])C([H])=C([H])C=1[H])C1C(=O)N(C(=C([H])C=1[H])C([H])([H])[H])C([H])([H])[H])C([H])([H])[H])C([H])([H])[H]	2.9431700000000003	5.8690050000000005	1.945048	5.89039455	1.0946441599999996	2.9876311000000007
[H]C1=NC2=C(C([H])=C([H])C(C3=NC([H])=C([H])C([H])=C3F)=C2C([H])=C1[H])C1=C([H])N=C([H])C(F)=C1[H]	2.98882	6.408634999999999	2.135672	6.381457849999999	1.2700182399999997	3.0255206
[H]C1=NC2=C(C3=NC([H])=C([H])C([H])=C3F)C([H])=C([H])C(C3=C([H])N=C([H])C(F)=C3[H])=C2C([H])=C1[H]	2.89669	6.3661379999999985	2.2740400000000003	6.342785579999998	1.3973168000000005	2.9490527
[H]C1=NC2=C([H])C([H])=C([H])C([H])=C2C(=N1)C1=C([H])C(C2N=C([H])C3=C([H])C([H])=C([H])C([H])=C3N=2)=C(C(=C1[H])C([H])([H])[H])[N+](=O)[O-]	2.92657	7.013785	2.8334919999999997	6.93214435	1.9120126399999995	2.9738531000000004
[H]C1=NC2=C([H])C([H])=C([H])C([H])=C2C(=N1)C1C([H])=C(C2N=C([H])C3=C([H])C([H])=C([H])C([H])=C3N=2)C([H])=C(C=1[N+](=O)[O-])C([H])([H])[H]	2.83029	6.968012	2.721804	6.8904909199999995	1.8092596800000003	2.8939407000000004
[H]C1=NC([H])=C(C2C([H])=C(C(=C(C3=NC([H])=C([H])N3[H])C=2Cl)N([H])[H])C([H])([H])[H])N1[H]	3.05107	5.691919	1.1379319999999993	5.729246290000001	0.35209743999999876	3.0771881000000003
[H]C1=NC([H])=C(C2C(Cl)=C(C3=NC([H])=C([H])N3[H])C([H])=C(C=2N([H])[H])C([H])([H])[H])N1[H]	2.90416	5.5970970000000015	1.133884	5.642958270000001	0.3483732799999997	2.9552528000000002
[H]C1N=C(C2C([H])=C([H])C([H])=C(C=2F)C([H])([H])[H])N(C=1C1=C([H])C([H])=C(F)C(=C1[H])C([H])([H])[H])C([H])([H])[H]	3.2867900000000003	5.984666000000001	1.12542	5.99564606	0.3405864000000003	3.2728357000000003
[H]C1N=C(C2=C([H])C([H])=C(F)C(=C2[H])C([H])([H])[H])N(C=1C1C([H])=C([H])C([H])=C(C=1F)C([H])([H])[H])C([H])([H])[H]	3.3606599999999998	6.029984000000002	1.102696	6.036885440000002	0.3196803199999998	3.3341478
[H]C1=NN2C(=N1)C(=C([H])C(C1=C([H])N=C(C([H])=C1OC([H])([H])[H])N([H])[H])=C2[H])C1C(=NC([H])=C([H])C=1OC([H])([H])[H])N([H])[H]	3.18968	6.118526999999999	1.3910239999999998	6.117459569999999	0.5849420799999994	3.1922344000000002
[H]C1=NN2C(=N1)C(=C([H])C(C1C(=NC([H])=C([H])C=1OC([H])([H])[H])N([H])[H])=C2[H])C1=C([H])N=C(C([H])=C1OC([H])([H])[H])N([H])[H]	3.2726800000000003	6.2808709999999985	1.4534919999999998	6.265192609999999	0.6424126399999999	3.2611244000000004
[H]C1=NC([H])=C(C2=C([H])C(C3=NC([H])=C([H])N3C([H])([H])[H])=C3C(=C2[H])C([H])([H])C([H])([H])C([H])([H])N3[H])N1C([H])([H])[H]	3.06518	5.286514	0.7533719999999997	5.360327740000001	-0.0016977600000007698	3.0888994
[H]C1=NC([H])=C(C2C([H])=C(C3=NC([H])=C([H])N3C([H])([H])[H])C([H])=C3C=2N([H])C([H])([H])C([H])([H])C3([H])[H])N1C([H])([H])[H]	2.84606	5.370143	0.8286280000000001	5.43643013	0.06753775999999956	2.9070298
[H]C1=NC(OC([H])([H])C2C([H])=C([H])C([H])=C([H])C=2[H])=C(C([H])=C1[H])C1=C(F)N=C(C(=C1[H])C1C([H])=NC(OC([H])([H])C2C([H])=C([H])C([H])=C([H])C=2[H])=C([H])C=1[H])C([H])([H])[H]	3.66693	6.4792510000000005	1.4235920000000002	6.4457184100000005	0.6149046399999998	3.5883519
[H]C1=NC(OC([H])([H])C2C([H])=C([H])C([H])=C([H])C=2[H])=C(C([H])=C1[H])C1C(=NC(F)=C(C=1[H])C1C([H])=NC(OC([H])([H])C2C([H])=C([H])C([H])=C([H])C=2[H])=C([H])C=1[H])C([H])([H])[H]	3.55156	6.493629	1.5143039999999997	6.458802390000001	0.6983596799999994	3.4925948
[H]C1=NC(C#N)=C(C([H])=C1C1=C(F)C([H])=C(F)C([H])=C1N([H])[H])C1C(F)=C([H])C(=C([H])C=1F)N([H])[H]	3.11498	6.313813	2.0329999999999995	6.29516983	1.175559999999999	3.1302334000000003
[H]C1=NC(C#N)=C(C([H])=C1C1C(F)=C([H])C(=C([H])C=1F)N([H])[H])C1=C(F)C([H])=C(F)C([H])=C1N([H])[H]	3.04028	6.290517	1.977432	6.27397047	1.1244374400000003	3.0682324000000003
[H]C1=NC([H])=C(C2=C([H])N=C(C3=NC([H])=C([H])N3[H])C3=NC([H])=C([H])N32)N1[H]	2.16712	5.897943	2.367512	5.916728129999999	1.4833110400000002	2.3435096000000004
[H]C1=NC([H])=C(C2=NC([H])=C(C3=NC([H])=C([H])N3[H])N3C2=NC([H])=C3[H])N1[H]	2.22356	5.929702000000002	2.31452	5.945628820000001	1.4345583999999998	2.3903548
[H]C1N=C(F)C(C2=NC(Cl)=C(C([H])=C2[H])C2=C([H])N=C(F)C([H])=C2C([H])([H])[H])=C(C=1[H])C([H])([H])[H]	3.79226	6.9687399999999995	1.733816	6.891153399999999	0.9003107200000002	3.6923758
[H]C1N=C(F)C(C2=C(Cl)N=C(C([H])=C2[H])C2=C([H])N=C(F)C([H])=C2C([H])([H])[H])=C(C=1[H])C([H])([H])[H]	3.73084	7.025614999999999	1.804288	6.942909649999999	0.9651449599999999	3.6413972
[H]C1N=C(C(C2C([H])=C([H])C3=C(C=2[H])C2=C([H])C([H])=C([H])C(=C2N3[H])[N+](=O)[O-])=C(C=1C1=C([H])C(=C2C(=C1[H])C1C([H])=C([H])C([H])=C([H])C=1N2[H])[N+](=O)[O-])C([H])([H])[H])N([H])[H]	2.46841	6.010783	2.476624	6.01941253	1.58369408	2.5935803
[H]C1N=C(C(C2=C([H])C(=C3C(=C2[H])C2C([H])=C([H])C([H])=C([H])C=2N3[H])[N+](=O)[O-])=C(C=1C1C([H])=C([H])C2=C(C=1[H])C1=C([H])C([H])=C([H])C(=C1N2[H])[N+](=O)[O-])C([H])([H])[H])N([H])[H]	2.47339	5.995404	2.43182	6.005417639999999	1.5424743999999997	2.5977137000000003
[H]C1=NC(C2C([H])=C(C3=NC([H])=C([H])N4C3=NC(=C4[H])C([H])([H])[H])C3=NC([H])=C([H])N3C=2[H])=C([H])N2C1=NC(=C2[H])C([H])([H])[H]	2.7970900000000003	5.99049	1.812016	6.0009459000000005	0.9722547199999996	2.8663847000000002
[H]C1=NC(C2C3=NC([H])=C([H])N3C([H])=C(C3=NC([H])=C([H])N4C3=NC(=C4[H])C([H])([H])[H])C=2[H])=C([H])N2C1=NC(=C2[H])C([H])([H])[H]	2.6983199999999994	5.922422	1.796836	5.9390040200000005	0.9582891199999999	2.7844055999999995
[H]C1=NC([H])=C2C([H])=C(C([H])=C([H])N12)C1=C(Cl)C(=C(Cl)C([H])=C1N([H])[H])C1=C([H])C([H])=C([H])C2=C([H])N=C([H])N21	2.62611	5.732322999999999	1.3801679999999994	5.76601393	0.5749545599999992	2.7244713000000003
[H]C1=NC([H])=C2C([H])=C(C([H])=C([H])N12)C1=C(Cl)C([H])=C(C(=C1Cl)C1=C([H])C([H])=C([H])C2=C([H])N=C([H])N21)N([H])[H]	2.70828	5.756164999999998	1.3350879999999998	5.787710149999999	0.5334809599999994	2.7926724
[H]C1N=C(Cl)C(C2C([H])=C([H])C([H])=C([H])C=2N([H])C(=S)C2C([H])=C([H])C([H])=C([H])C=2[H])=C(C=1C1C([H])=C([H])C([H])=C(C=1[H])N([H])C(=S)C1C([H])=C([H])C([H])=C([H])C=1[H])C([H])([H])[H]	2.2634	6.0187	2.259964	6.026617	1.38436688	2.423422
[H]C1N=C(Cl)C(C2C([H])=C([H])C([H])=C(C=2[H])N([H])C(=S)C2C([H])=C([H])C([H])=C([H])C=2[H])=C(C=1C1C([H])=C([H])C([H])=C([H])C=1N([H])C(=S)C1C([H])=C([H])C([H])=C([H])C=1[H])C([H])([H])[H]	2.28913	6.086313	2.314336	6.088144829999999	1.4343891199999996	2.4447779
[H]SC1=C([H])C([H])=C([H])C(C2=NC([H])=C(C3=C([H])C([H])=C([H])C([H])=C23)C2C([H])=C([H])C([H])=C([H])C=2S[H])=C1[H]	3.00625	6.028073	1.857372	6.03514643	1.0139822399999998	3.0399875000000005
[H]SC1=C([H])C([H])=C([H])C(=C1[H])C1=C([H])N=C(C2=C([H])C([H])=C([H])C([H])=C12)C1C([H])=C([H])C([H])=C([H])C=1S[H]	3.14237	6.013240000000001	1.842192	6.0216484	1.0000166400000001	3.1529671
[H]C1N=C2C(=NC=1C1C([H])=C([H])C(OC(C([H])([H])[H])(C([H])([H])[H])C([H])([H])[H])=C([H])C=1[H])C(C1C([H])=C([H])C([H])=C([H])C=1OC(C([H])([H])[H])(C([H])([H])[H])C([H])([H])[H])=C([H])N2[H]	3.04609	6.034989	1.849552	6.041439990000001	1.0067878400000003	3.0730547
[H]C1N=C2C(=NC=1C1C([H])=C([H])C([H])=C([H])C=1OC(C([H])([H])[H])(C([H])([H])[H])C([H])([H])[H])C(C1C([H])=C([H])C(OC(C([H])([H])[H])(C([H])([H])[H])C([H])([H])[H])=C([H])C=1[H])=C([H])N2[H]	2.93321	6.174674	1.9340080000000004	6.168553340000001	1.0844873600000007	2.9793643000000003
[H]C1=C([H])C(C(=O)Cl)=C([H])C(=C1[H])C1=C([H])C(=C(C([H])=C1N([H])C(=O)C([H])([H])[H])C1C([H])=C([H])C([H])=C(C(=O)Cl)C=1[H])[N+](=O)[O-]	2.89171	7.1970589999999985	2.789516	7.098923689999999	1.8715547199999998	2.9449193
[H]C1=C([H])C(C(=O)Cl)=C([H])C(=C1[H])C1C([H])=C(C(=C([H])C=1[N+](=O)[O-])C1C([H])=C([H])C([H])=C(C(=O)Cl)C=1[H])N([H])C(=O)C([H])([H])[H]	2.8742799999999997	7.199061	2.820152	7.10074551	1.89973984	2.9304524
[H]C(=O)C1=C([H])C(C2=NN3C(=N2)C([H])=C([H])C([H])=C3[H])=C([H])C(=C1F)C1C([H])=C([H])C2=NC([H])=NN2C=1[H]	3.12079	6.6716250000000015	2.1429400000000003	6.620778750000001	1.2767048	3.1350557
[H]C(=O)C1=C([H])C(=C([H])C(C2=NN3C(=N2)C([H])=C([H])C([H])=C3[H])=C1F)C1C([H])=C([H])C2=NC([H])=NN2C=1[H]	3.12743	6.686458	2.127668	6.63427678	1.2626545599999996	3.1405669
[H]C1=NC(=C(C2=NC([H])=C([H])N2C([H])([H])[H])C([H])=C1C1N=C([H])N(C=1[H])C([H])([H])[H])N([H])[H]	3.14154	5.537583000000001	0.8664399999999999	5.58880053	0.10232479999999988	3.1522782000000005
[H]C1=NC(=C(C([H])=C1C1=NC([H])=C([H])N1C([H])([H])[H])C1N=C([H])N(C=1[H])C([H])([H])[H])N([H])[H]	3.2320100000000003	5.5551460000000015	0.8123440000000004	5.604782860000001	0.052556479999999794	3.2273683
[H]C(=O)C1=C([H])N=C(C([H])=C1[H])C1C([H])=C(C([H])=C(C([H])=O)C=1OC([H])(C([H])([H])[H])C([H])([H])[H])C1N=C([H])C([H])=C([H])C=1C([H])=O	2.76804	6.698288000000001	2.588772	6.6450420800000005	1.6868702400000002	2.8422732
[H]C(=O)C1=C([H])N=C(C([H])=C1[H])C1=C([H])C(C2N=C([H])C([H])=C([H])C=2C([H])=O)=C(OC([H])(C([H])([H])[H])C([H])([H])[H])C(C([H])=O)=C1[H]	2.71741	6.852169	2.5386319999999998	6.78507379	1.6407414399999998	2.8002503
[H]C1=C([H])C([H])=C2C([H])=C(N=C(C2=C1[H])C1C([H])=C(Cl)C(=C([H])C=1F)N([H])[H])C1C(F)=C([H])C([H])=C(Cl)C=1N([H])[H]	2.90499	6.024979	1.8816599999999999	6.03233089	1.0363271999999997	2.9559417000000003
[H]C1=C([H])C([H])=C2C([H])=C(N=C(C2=C1[H])C1C(F)=C([H])C([H])=C(Cl)C=1N([H])[H])C1C([H])=C(Cl)C(=C([H])C=1F)N([H])[H]	2.89088	6.0840380000000005	1.847068	6.08607458	1.0045025599999997	2.9442304000000004
[H]C1N=C(C(C2=NC3C([H])=C([H])C(=C([H])C=3C([H])=C2[H])C2=C([H])N=C(C([H])=C2C([H])([H])[H])N([H])[H])=C(C=1[H])C([H])([H])[H])N([H])[H]	3.11083	6.026435	1.7446720000000002	6.033655850000001	0.9102982400000004	3.1267889
[H]C1N=C(C(C2C([H])=C([H])C3N=C(C([H])=C([H])C=3C=2[H])C2=C([H])N=C(C([H])=C2C([H])([H])[H])N([H])[H])=C(C=1[H])C([H])([H])[H])N([H])[H]	3.1506699999999994	6.027618	1.776872	6.03473238	0.9399222399999996	3.1598561
[H]C(=O)C1=C([H])SC(=C1[H])C1C([H])=C(C([H])=C2N=C([H])C([H])=C([H])C=12)C1SC([H])=C([H])C=1C([H])=O	2.85104	6.310992	2.3940080000000004	6.29260272	1.5076873600000003	2.9111632
[H]C(=O)C1=C([H])SC(=C1[H])C1C([H])=C2N=C([H])C([H])=C([H])C2=C(C=1[H])C1SC([H])=C([H])C=1C([H])=O	2.82033	6.2919730000000005	2.408636	6.27529543	1.52114512	2.8856739
[H]C(=O)C1C(=NC([H])=C([H])C=1[H])C1=C([H])C(=C(Cl)C(=C1[H])C([H])([H])[H])C1C([H])=C([H])N=C([H])C=1C([H])=O	2.67342	6.919053999999999	2.4608	6.845939139999999	1.5691359999999999	2.7637386000000004
[H]C(=O)C1C(=NC([H])=C([H])C=1C1=C([H])C([H])=C(Cl)C(=C1[H])C([H])([H])[H])C1C([H])=C([H])C([H])=C(C=1Cl)C([H])([H])[H]	2.6684400000000004	6.904767	2.362452	6.83293797	1.47865584	2.7596052
[H]C1=NC(=C(C([H])=C1[H])C1C([H])=C([H])C(C2C([H])=C([H])C([H])=C([H])C=2[H])=C(C=1[H])C1C([H])=NC(=C([H])C=1[H])[N+](=O)[O-])[N+](=O)[O-]	2.63773	6.732867999999999	2.669916	6.676509879999999	1.7615227200000003	2.7341159
[H]C1=NC(=C(C([H])=C1[H])C1C([H])=C(C([H])=C([H])C=1C1C([H])=C([H])C([H])=C([H])C=1[H])C1C([H])=NC(=C([H])C=1[H])[N+](=O)[O-])[N+](=O)[O-]	2.67674	6.687640999999998	2.672216	6.635353309999998	1.7636387200000003	2.7664942000000003
[H]C1=NC2C(C(Cl)=N1)=C([H])C(=C([H])C=2C1C(=NC([H])=C([H])C=1C(F)(F)F)N([H])[H])C1=C([H])N=C(C([H])=C1C(F)(F)F)N([H])[H]	3.20047	6.5061870000000015	2.467516	6.470230170000002	1.5753147199999997	3.2011901000000003
[H]C1=NC2C(C(Cl)=N1)=C([H])C(=C([H])C=2C1=C([H])N=C(C([H])=C1C(F)(F)F)N([H])[H])C1C(=NC([H])=C([H])C=1C(F)(F)F)N([H])[H]	3.03281	6.456956	2.473128	6.42542996	1.58047776	3.0620323000000003
[H]C(=O)C1=C([H])C(C2=NC(=C([H])N2C([H])([H])[H])C([H])([H])[H])=C(C([H])=O)C([H])=C1C1=C(N=C([H])N1C([H])([H])[H])C([H])([H])[H]	2.4534700000000003	6.346573	2.7905279999999997	6.32498143	1.8724857599999996	2.5811801
[H]C(=O)C1=C([H])C(=C(C([H])=O)C([H])=C1C1=NC(=C([H])N1C([H])([H])[H])C([H])([H])[H])C1=C(N=C([H])N1C([H])([H])[H])C([H])([H])[H]	2.37296	6.279961	2.793748	6.26436451	1.87544816	2.5143568
[H]C1=NN([H])C2=C([H])C(=C([H])C(C3=NC(=C([H])C([H])=C3C([H])([H])[H])C([H])([H])[H])=C12)C1C([H])=C(C([H])=NC=1C([H])([H])[H])C([H])([H])[H]	3.4005	6.1794970000000005	1.454872	6.17294227	0.6436822399999995	3.367215
[H]C1=NN([H])C2=C([H])C(C3=NC(=C([H])C([H])=C3C([H])([H])[H])C([H])([H])[H])=C([H])C(=C12)C1C([H])=C(C([H])=NC=1C([H])([H])[H])C([H])([H])[H]	3.28181	6.1319040000000005	1.497008	6.1296326400000005	0.6824473600000003	3.2687023
[H]C1=NC(=C(S1)C1N=C(SC=1C([H])([H])[H])C1=NC(=C([H])S1)C([H])([H])[H])C([H])([H])[H]	2.51406	5.857084	2.13466	5.87954644	1.2690871999999995	2.6314698000000005
[H]C1=NC(=C(S1)C1=NC(C2=NC(=C([H])S2)C([H])([H])[H])=C(S1)C([H])([H])[H])C([H])([H])[H]	2.44351	5.7774589999999995	2.1727479999999995	5.8070876899999995	1.3041281599999994	2.5729132999999997
[H]C1N=C2C(=C([H])C=1C1=C([H])C([H])=C3C(=C1[H])C([H])=C([H])N3[H])C(C1C([H])=C([H])C([H])=C3C([H])=C([H])N([H])C=13)=C([H])N2[H]	3.2096	5.503094	0.9680080000000002	5.55741554	0.1957673599999996	3.208768
[H]C1N=C2C(=C([H])C=1C1C([H])=C([H])C([H])=C3C([H])=C([H])N([H])C=13)C(C1=C([H])C([H])=C3C(=C1[H])C([H])=C([H])N3[H])=C([H])N2[H]	3.28181	5.519656	0.982544	5.572486960000001	0.2091404799999994	3.2687023
[H]C1=NC2C(=C([H])C(=C([H])C=2C2C([H])=C([H])C(OC(C([H])([H])[H])(C([H])([H])[H])C([H])([H])[H])=C([H])C=2[H])[N+](=O)[O-])C([H])=C1C1C([H])=C([H])C([H])=C([H])C=1OC(C([H])([H])[H])(C([H])([H])[H])C([H])([H])[H]	2.79377	6.394712	2.75244	6.36878792	1.8374448	2.8636291
[H]C1=NC2C(=C([H])C(=C([H])C=2C2C([H])=C([H])C([H])=C([H])C=2OC(C([H])([H])[H])(C([H])([H])[H])C([H])([H])[H])[N+](=O)[O-])C([H])=C1C1C([H])=C([H])C(OC(C([H])([H])[H])(C([H])([H])[H])C([H])([H])[H])=C([H])C=1[H]	2.7365	6.443487999999999	2.735052	6.413174079999999	1.8214478400000003	2.816095
[H]C1=C2OC(F)(F)OC2=C([H])C(=C1C1N=C(C([H])=C(C=1N([H])[H])C([H])([H])[H])C1=C2OC(F)(F)OC2=C([H])C([H])=C1N([H])[H])N([H])[H]	2.69666	5.870369999999999	1.6045559999999996	5.891636699999999	0.7813915199999997	2.7830278
[H]C1=C2OC(F)(F)OC2=C([H])C(=C1C1=NC(C2=C3OC(F)(F)OC3=C([H])C([H])=C2N([H])[H])=C(C(=C1[H])C([H])([H])[H])N([H])[H])N([H])[H]	2.40118	6.0915	1.94744	6.092865	1.0968448000000004	2.5377794000000002
[H]C1=NC(OC([H])([H])[H])=C(C([H])=C1[H])C1N=C(C(=NC=1[H])N(C([H])([H])[H])C([H])([H])[H])C1C([H])=NC(OC([H])([H])[H])=C([H])C=1[H]	2.9863299999999997	5.99959	1.74458	6.009226900000001	0.9102135999999996	3.0234539
[H]C1=NC(OC([H])([H])[H])=C(C2=NC(=C([H])N=C2N(C([H])([H])[H])C([H])([H])[H])C2C([H])=NC(OC([H])([H])[H])=C([H])C=2[H])C([H])=C1[H]	2.97222	6.0407220000000015	1.805116	6.046657020000001	0.9659067199999996	3.0117426000000003
[H]C1C([H])=C(C(=C(C2=NC(=C(C3C([H])=C(C(=C([H])C=3I)[N+](=O)[O-])C([H])([H])[H])N2[H])[N+](=O)[O-])C=1I)[N+](=O)[O-])C([H])([H])[H]	2.8776	7.215259	3.030832	7.11548569	2.09356544	2.9332080000000005
[H]C1C([H])=C(C(=C(C=1I)C1=C(N=C(C2C([H])=C(C(=C([H])C=2I)[N+](=O)[O-])C([H])([H])[H])N1[H])[N+](=O)[O-])[N+](=O)[O-])C([H])([H])[H]	3.02949	7.247837	2.867532	7.14513167	1.9433294400000003	3.0592767
[H]C1=C(F)C(=C([H])C(=C1Cl)C1C([H])=C(Cl)C(=C([H])C=1N([H])[H])C([H])([H])[H])C1C(=C([H])C([H])=C(Cl)C=1C([H])([H])[H])N([H])[H]	3.04028	6.197788	1.4073079999999996	6.18958708	0.5999233599999991	3.0682324000000003
[H]C1=C(F)C(=C([H])C(=C1Cl)C1C(=C([H])C([H])=C(Cl)C=1C([H])([H])[H])N([H])[H])C1C([H])=C(Cl)C(=C([H])C=1N([H])[H])C([H])([H])[H]	3.2834699999999994	6.198607	1.2144759999999994	6.19033237	0.42251791999999977	3.2700800999999995
[H]C1=NC([H])=C([H])C(C2=C([H])C(=C(C3=NC([H])=C([H])C([H])=C3[N+](=O)[O-])C([H])=C2C([H])([H])[H])N([H])[H])=C1[N+](=O)[O-]	2.4709	6.2367360000000005	2.4912520000000002	6.22502976	1.5971518400000004	2.595647
[H]C1=NC([H])=C([H])C(C2C([H])=C(C(C3=NC([H])=C([H])C([H])=C3[N+](=O)[O-])=C([H])C=2N([H])[H])C([H])([H])[H])=C1[N+](=O)[O-]	2.35221	6.166848	2.480948	6.16143168	1.5876721600000003	2.4971343
[H]C1=C(F)N=C(C(=C1[H])C1C([H])=C([H])C(=C(C#N)C=1[H])C1=C(F)N=C(C([H])=C1[H])C([H])([H])[H])C([H])([H])[H]	3.58891	6.850167000000001	1.8069560000000002	6.78325197	0.9675995200000003	3.5235953
[H]C1=C(F)N=C(C(=C1[H])C1C([H])=C([H])C(=C([H])C=1C#N)C1=C(F)N=C(C([H])=C1[H])C([H])([H])[H])C([H])([H])[H]	3.5831	6.849894	1.87476	6.78300354	1.0299791999999997	3.5187730000000004
[H]C1N=C(C([H])=C(C2C([H])=C([H])C([H])=C(Cl)C=2C([H])([H])[H])C=1N([H])[H])C1C([H])=C([H])C([H])=C(C=1Cl)C([H])([H])[H]	3.4569400000000003	6.1509230000000015	1.3468639999999998	6.146939930000001	0.54431488	3.4140602000000007
[H]C1N=C(C([H])=C(C2C([H])=C([H])C([H])=C(C=2Cl)C([H])([H])[H])C=1N([H])[H])C1C([H])=C([H])C([H])=C(Cl)C=1C([H])([H])[H]	3.43121	6.129811	1.3243239999999998	6.12772801	0.5235780800000001	3.3927043
[H]C1=NC([H])=C(C2=NN([H])C([H])=C12)C1=C([H])C(=C(C2=C3C([H])=NC([H])=C([H])C3=NN2[H])C(=C1[H])C([H])([H])[H])[N+](=O)[O-]	2.7365	6.528573000000001	2.5770880000000003	6.490601430000001	1.6761209600000004	2.816095
[H]C1=NC([H])=C(C2=NN([H])C([H])=C12)C1=C(C([H])=C(C([H])=C1C([H])([H])[H])C1=C2C([H])=NC([H])=C([H])C2=NN1[H])[N+](=O)[O-]	2.68089	6.519564	2.660992	6.48240324	1.7533126399999999	2.7699387000000004
[H]C1=C([H])C([H])=C(C(=O)N([H])C2C([H])=C(C([H])=C([H])C=2C2C([H])=C(OC([H])([H])[H])C(=C([H])C=2[H])N([H])[H])C2C([H])=C([H])C([H])=C(OC([H])([H])[H])C=2N([H])[H])C([H])=C1[H]	3.3780900000000003	6.051824	1.613572	6.05675984	0.78968624	3.3486147000000006
[H]C1=C([H])C([H])=C(C(=O)N([H])C2C([H])=C(C([H])=C([H])C=2C2C([H])=C([H])C([H])=C(OC([H])([H])[H])C=2N([H])[H])C2C([H])=C(OC([H])([H])[H])C(=C([H])C=2[H])N([H])[H])C([H])=C1[H]	3.18055	5.769451	1.4978360000000004	5.79980041	0.6832091199999999	3.1846565
[H]C1=C([H])C(=C(C(F)=C1[H])C1C([H])=C([H])C(=C(C2C([H])=C([H])C(=C([H])C=2F)[N+](=O)[O-])C=1C([H])([H])[H])C([H])([H])[H])[N+](=O)[O-]	3.01538	6.959003000000001	2.616372	6.882292730000001	1.7122622400000003	3.0475654
[H]C1=C([H])C(=C(C(F)=C1[H])C1=C(C([H])=C([H])C(C2C([H])=C([H])C(=C([H])C=2F)[N+](=O)[O-])=C1C([H])([H])[H])C([H])([H])[H])[N+](=O)[O-]	3.1000400000000004	6.951086	2.6135200000000003	6.87508826	1.7096384000000002	3.1178332000000006
[H]C1=C([H])C(C2=NC3C([H])=C(C([H])=C([H])C=3S2)C2=C([H])C([H])=C(Cl)C(=C2[H])C(F)(F)F)=C(Cl)C(=C1[H])C(F)(F)F	3.13656	6.65843	2.22942	6.6087713	1.3562664	3.1481448
[H]C1=C([H])C(=C(Cl)C(=C1[H])C(F)(F)F)C1C([H])=C([H])C2SC(=NC=2C=1[H])C1=C([H])C([H])=C(Cl)C(=C1[H])C(F)(F)F	3.06767	6.596914	2.187836	6.55279174	1.3180091200000001	3.0909661
[H]C1=NC2=C(C(=C1[H])C1C3=NSN=C3C(C3=NC4=C(C([H])=C3[H])N([H])C([H])([H])C([H])([H])C4([H])[H])=C(F)C=1[H])N([H])C([H])([H])C([H])([H])C2([H])[H]	2.19451	5.781281	3.039848	5.81056571	2.10186016	2.3662433000000003
[H]C1=NC2=C(C(=C1[H])C1C3=NSN=C3C(C3=NC4=C(C([H])=C3[H])N([H])C([H])([H])C([H])([H])C4([H])[H])=C([H])C=1F)N([H])C([H])([H])C([H])([H])C2([H])[H]	2.38873	5.878742000000001	3.048772	5.899255220000001	2.1100702399999998	2.5274459
[H]C1=NC(C2=NC([H])=C(F)C(C3=NC([H])=C(F)C([H])=C3[H])=C2[H])=C(F)C([H])=C1[H]	3.51255	7.039811	2.058024	6.95582801	1.1985820799999996	3.4602165
[H]C1=NC(=C(F)C([H])=C1[H])C1=C([H])C(=NC([H])=C1F)C1=NC([H])=C(F)C([H])=C1[H]	3.38805	7.1769479999999986	2.1804759999999996	7.0806226799999985	1.31123792	3.3568815
[H]C1=NN2C(=N1)C(=NC(C1=C([H])C([H])=NC3=C1N([H])C([H])([H])C([H])([H])C3([H])[H])=C2[H])C1=NC2=C(C([H])=C1[H])N([H])C([H])([H])C([H])([H])C2([H])[H]	2.28332	5.881380999999998	2.113224	5.901656709999998	1.2493660799999997	2.4399556
[H]C1=NN2C(=N1)C(=NC(C1=NC3=C(C([H])=C1[H])N([H])C([H])([H])C([H])([H])C3([H])[H])=C2[H])C1=C([H])C([H])=NC2=C1N([H])C([H])([H])C([H])([H])C2([H])[H]	2.64105	6.035808	2.054344	6.04218528	1.19519648	2.7368715000000003
[H]C1=C([H])C([H])=C(C([H])=C1[H])C([H])([H])N1N=C(N=C1C1=C([H])C(=C([H])C([H])=C1N([H])[H])[N+](=O)[O-])C1C([H])=C(C([H])=C([H])C=1[N+](=O)[O-])N([H])[H]	2.7232199999999995	6.413003	2.319672	6.38543273	1.4392982400000003	2.8050726
[H]C1=C([H])C([H])=C(C([H])=C1[H])C([H])([H])N1N=C(N=C1C1C([H])=C(C([H])=C([H])C=1[N+](=O)[O-])N([H])[H])C1=C([H])C(=C([H])C([H])=C1N([H])[H])[N+](=O)[O-]	2.72405	6.562607000000001	2.296672	6.521572370000001	1.4181382400000002	2.8057615
[H]C1=NC(=C(C([H])=C1C1C(=NC([H])=C([H])C=1OC([H])([H])[H])OC([H])([H])[H])C1=C([H])N=C(OC([H])([H])[H])C([H])=C1OC([H])([H])[H])N([H])[H]	3.3756	6.142278	1.355144	6.13907298	0.5519324799999996	3.3465480000000003
[H]C1=NC(=C(C([H])=C1C1=C([H])N=C(OC([H])([H])[H])C([H])=C1OC([H])([H])[H])C1C(=NC([H])=C([H])C=1OC([H])([H])[H])OC([H])([H])[H])N([H])[H]	3.38473	6.112612	1.2817280000000002	6.11207692	0.48438976	3.3541258999999997
[H]C1=C([H])C(C2C([H])=C(C([H])=C([H])C=2C(F)(F)F)C2=C([H])C([H])=C3C(C(=O)C(=O)N3C([H])([H])C([H])([H])[H])=C2[H])=C2C(C(=O)C(=O)N2C([H])([H])C([H])([H])[H])=C1[H]	1.67327	6.717397999999999	2.924756	6.66243218	1.99597552	1.9336141000000002
[H]C1=C([H])C(C2C([H])=C([H])C(=C(C=2[H])C2=C([H])C([H])=C3C(C(=O)C(=O)N3C([H])([H])C([H])([H])[H])=C2[H])C(F)(F)F)=C2C(C(=O)C(=O)N2C([H])([H])C([H])([H])[H])=C1[H]	1.64173	6.699561999999999	2.934508	6.646201419999999	2.00494736	1.9074359000000003
[H]C1=NC([H])=C(S1)C1C([H])=C(C2=NC([H])=C([H])S2)C(=C([H])C=1OC([H])([H])[H])C([H])([H])[H]	2.82199	5.807125	1.630776	5.83408375	0.8055139200000001	2.8870517
[H]C1N=C(SC=1C1=C([H])C([H])=C(OC([H])([H])[H])C([H])=C1C([H])([H])[H])C1C([H])=C([H])C(=C([H])C=1OC([H])([H])[H])C([H])([H])[H]	2.7116	5.759077	1.6918639999999998	5.790360069999999	0.8617148800000001	2.7954280000000002
[H]C1=NC(Cl)=C(C([H])=C1[H])C1C([H])=C([H])C(=C(C2=NC(Cl)=C([H])C([H])=C2[H])C=1[H])C([H])([H])[H]	3.61381	6.59473	1.564076	6.5508043	0.7441499199999999	3.5442623
[H]C1=NC(Cl)=C(C([H])=C1[H])C1C([H])=C(C2=NC(Cl)=C([H])C([H])=C2[H])C([H])=C([H])C=1C([H])([H])[H]	3.67689	6.542951	1.5287480000000002	6.503685410000001	0.7116481600000002	3.5966187000000005
[H]C1=C([H])C(C2=NC(C3C([H])=C(C#N)C(F)=C([H])C=3[H])=C(N=C2Cl)N([H])[H])=C(F)C(C#N)=C1[H]	3.00376	6.604375999999999	2.1986	6.55958216	1.3279119999999995	3.0379208
[H]C1=C([H])C(=C(F)C(C#N)=C1[H])C1N=C(C(Cl)=NC=1N([H])[H])C1C([H])=C(C#N)C(F)=C([H])C=1[H]	3.07514	6.5911810000000015	2.200072	6.547574710000001	1.32926624	3.0971662
[H]C1=C([H])C(F)=C(C(F)=C1[H])C1=C([H])C(=NC(C2C([H])=C([H])C(F)=C([H])C=2F)=C1N([H])[H])C([H])([H])[H]	3.1349	6.163572	1.359928	6.158450520000001	0.5563337600000002	3.146767
[H]C1=C([H])C(F)=C(C(F)=C1[H])C1N=C(C([H])=C(C2C([H])=C([H])C(F)=C([H])C=2F)C=1N([H])[H])C([H])([H])[H]	3.0178700000000003	6.155837	1.4306759999999996	6.15141167	0.6214219199999995	3.0496321
[H]C1=NC([H])=C([H])C(C2=C(N=C(C3=NC([H])=C([H])C([H])=C3C([H])([H])[H])N2[H])C(=O)OC([H])([H])[H])=C1C([H])([H])[H]	3.2212199999999998	6.841522	2.028216	6.77538502	1.1711587200000002	3.2184125999999997
[H]C1=NC([H])=C([H])C(C2=NC(C(=O)OC([H])([H])[H])=C(C3=NC([H])=C([H])C([H])=C3C([H])([H])[H])N2[H])=C1C([H])([H])[H]	3.1880199999999994	6.867821000000001	1.997304	6.7993171100000005	1.14271968	3.1908565999999996
[H]C1=NC([H])=C(C2=NSN=C12)C1C([H])=C(C([H])=NC=1C([H])([H])C([H])([H])[H])C1=NC([H])=C([H])C2=NSN=C21	2.76389	6.753343000000001	3.440784	6.695142130000001	2.47072128	2.8388287
[H]C1=NC([H])=C(C2=NSN=C12)C1C([H])=NC(=C(C2=NC([H])=C([H])C3=NSN=C32)C=1[H])C([H])([H])C([H])([H])[H]	2.7389900000000003	6.779551	3.440692	6.718991409999999	2.47063664	2.8181617
[H]C1=NC([H])=C(C([H])=C1[H])C1C([H])=C(C2=NC([H])=C([H])C([H])=C2[H])C(=C(C#N)C=1Cl)N([H])[H]	3.08344	6.230639	1.7466959999999998	6.21948149	0.9121603199999999	3.1040552000000003
[H]C1=NC([H])=C(C([H])=C1[H])C1=C([H])C(C2=NC([H])=C([H])C([H])=C2[H])=C(Cl)C(C#N)=C1N([H])[H]	2.9838400000000003	6.242287	1.8216759999999999	6.23008117	0.9811419199999998	3.0213872000000004
[H]C1N=C(Cl)C(=NC=1C1SC([H])=C([H])C=1C(=O)C([H])([H])[H])C1SC([H])=C(C(=O)C([H])([H])[H])C=1[H]	2.91246	6.714668	2.601652	6.65994788	1.6987198399999999	2.9621418
[H]C1N=C(Cl)C(=NC=1C1SC([H])=C(C(=O)C([H])([H])[H])C=1[H])C1SC([H])=C([H])C=1C(=O)C([H])([H])[H]	2.63441	6.6729899999999995	2.821072	6.622020899999999	1.90058624	2.7313603000000004
[H]C1=C([H])C(C2C([H])=C([H])C(OC([H])([H])[H])=C(C=2[H])C2C([H])=C([H])C([H])=C3C([H])=C([H])N([H])C=23)=C2C([H])=C([H])N([H])C2=C1[H]	3.18636	5.561152	0.94142	5.61024832	0.17130639999999975	3.1894788000000003
[H]C1=C([H])C(C2C([H])=C(C([H])=C([H])C=2OC([H])([H])[H])C2C([H])=C([H])C([H])=C3C([H])=C([H])N([H])C=23)=C2C([H])=C([H])N([H])C2=C1[H]	3.08759	5.56916	0.9489639999999993	5.6175356	0.17824687999999878	3.1074997
[H]C1=NC(=C([H])C2C1=NN([H])C=2C1=C(SC([H])=C1C([H])([H])[H])C([H])([H])[H])C1SC(=C([H])C=1C([H])([H])[H])C([H])([H])[H]	2.6535	5.705387	1.7124720000000002	5.74150217	0.8806742400000003	2.747205
[H]C1=NC(=C([H])C2C1=NN([H])C=2C1SC(=C([H])C=1C([H])([H])[H])C([H])([H])[H])C1=C(SC([H])=C1C([H])([H])[H])C([H])([H])[H]	2.66927	5.639048000000002	1.6785240000000001	5.681133680000001	0.8494420800000002	2.7602941000000003
[H]C1N=C(C2C([H])=C([H])C([H])=C(F)C=2Cl)C(=C(C=1[H])C1C([H])=C([H])C([H])=C(Cl)C=1F)N([H])[H]	3.26189	6.307352	1.5606719999999998	6.28929032	0.7410182399999998	3.2521687000000004
[H]C1N=C(C2C([H])=C([H])C([H])=C(Cl)C=2F)C(=C(C=1[H])C1C([H])=C([H])C([H])=C(F)C=1Cl)N([H])[H]	3.1448599999999995	6.289152	1.5939759999999996	6.27272832	0.7716579199999991	3.1550338
[H]C1C(=NC2C([H])=C(C([H])=C([H])C=2C=1[H])C1=C([H])C([H])=C(C(=C1[H])C([H])(C([H])([H])[H])C([H])([H])[H])N([H])[H])C1C([H])=C([H])C([H])=C(C=1N([H])[H])C([H])(C([H])([H])[H])C([H])([H])[H]	2.94898	5.8690050000000005	1.6899319999999998	5.89039455	0.8599374399999995	2.9924534000000005
[H]C1C(=NC2C([H])=C(C([H])=C([H])C=2C=1[H])C1C([H])=C([H])C([H])=C(C=1N([H])[H])C([H])(C([H])([H])[H])C([H])([H])[H])C1=C([H])C([H])=C(C(=C1[H])C([H])(C([H])([H])[H])C([H])([H])[H])N([H])[H]	2.90084	5.778460000000001	1.682848	5.807998600000001	0.8534201599999998	2.9524972000000003
[H]C1=NN2C(=N1)C(=NC([H])=C2[H])C1C([H])=C([H])C(C2N=C([H])C3=NC([H])=NN3C=2[H])=C(C=1[H])C([H])(C([H])([H])[H])C([H])([H])[H]	3.1838699999999998	6.543497	2.062716	6.50418227	1.2028987200000003	3.1874121
[H]C1=NN2C(=N1)C(=NC([H])=C2[H])C1C([H])=C([H])C(=C([H])C=1C([H])(C([H])([H])[H])C([H])([H])[H])C1N=C([H])C2=NC([H])=NN2C=1[H]	3.08261	6.542314	2.110832	6.5031057400000005	1.2471654399999998	3.1033663000000002
[H]C(=O)C1=C([H])C(=NC([H])=C1C1=C2OC(F)(F)OC2=C([H])C([H])=C1N([H])[H])C1C([H])=C2OC(F)(F)OC2=C([H])C=1N([H])[H]	2.44766	6.217353	2.6680759999999997	6.20739123	1.7598299199999996	2.5763578000000003
[H]C(=O)C1=C([H])C(=NC([H])=C1C1C([H])=C2OC(F)(F)OC2=C([H])C=1N([H])[H])C1=C2OC(F)(F)OC2=C([H])C([H])=C1N([H])[H]	2.40865	6.298433999999999	2.721068	6.28117494	1.8085825599999996	2.5439795000000003
[H]C1=C([H])C(C2=C([H])C(C3=C([H])C([H])=C(C(=C3[H])C([H])([H])[H])[N+](=O)[O-])=C(C(=C2[H])[N+](=O)[O-])C([H])([H])[H])=C(C(=C1[H])C([H])([H])[H])[N+](=O)[O-]	3.0792900000000003	7.294702000000001	2.691444	7.187778820000001	1.78132848	3.1006107000000007
[H]C1=C([H])C(C2C([H])=C(C([H])=C(C=2C([H])([H])[H])[N+](=O)[O-])C2=C([H])C([H])=C(C(=C2[H])C([H])([H])[H])[N+](=O)[O-])=C(C(=C1[H])C([H])([H])[H])[N+](=O)[O-]	3.09174	7.325824000000001	2.665408	7.216099840000001	1.7573753600000002	3.1109442000000005
[H]C1N=C(C(C#N)=C(C=1[H])C1=C([H])N=C(Cl)C([H])=C1C([H])([H])[H])C1C(Cl)=NC([H])=C([H])C=1C([H])([H])[H]	3.67855	7.324822999999999	2.2821359999999995	7.21518893	1.4047651199999995	3.5979965000000003
[H]C1N=C(C(C#N)=C(C=1[H])C1C(Cl)=NC([H])=C([H])C=1C([H])([H])[H])C1=C([H])N=C(Cl)C([H])=C1C([H])([H])[H]	3.6021900000000002	7.377694	2.273764	7.2633015400000005	1.39706288	3.5346177
[H]C1N=C(Cl)C(C2=C([H])C(=C(C3=C([H])N=C(Cl)C([H])=C3C([H])([H])[H])C(=C2[H])C([H])([H])[H])[N+](=O)[O-])=C(C=1[H])C([H])([H])[H]	3.1174699999999995	7.122712	2.610024	7.0312679199999994	1.7064220800000003	3.1323000999999997
[H]C1N=C(Cl)C(C2=C(C([H])=C(C([H])=C2C([H])([H])[H])C2=C([H])N=C(Cl)C([H])=C2C([H])([H])[H])[N+](=O)[O-])=C(C=1[H])C([H])([H])[H]	3.14237	7.149647999999999	2.615544	7.055779679999999	1.7115004799999998	3.1529671
[H]C1OC2C([H])=C([H])C(=C([H])C=2C=1C1C([H])=C([H])C(C(=O)OC([H])([H])[H])=C([H])C=1[H])C1C([H])=C([H])C([H])=C([H])C=1C(=O)OC([H])([H])[H]	3.3183300000000004	6.439211	1.7429240000000004	6.40928201	0.9086900800000004	3.2990139000000003
[H]C1OC2C([H])=C([H])C(=C([H])C=2C=1C1C([H])=C([H])C([H])=C([H])C=1C(=O)OC([H])([H])[H])C1C([H])=C([H])C(C(=O)OC([H])([H])[H])=C([H])C=1[H]	3.5084000000000004	6.390526	1.6695080000000002	6.36497866	0.8411473599999999	3.4567720000000004
[H]C1=C([H])C(C2=C(Cl)N=C(C(=C2[H])C2=C([H])C([H])=C(C(=C2[H])[N+](=O)[O-])C([H])([H])[H])C([H])([H])[H])=C(C(=C1[H])[N+](=O)[O-])C([H])([H])[H]	3.14071	7.010145	2.555192	6.928831949999999	1.6559766399999996	3.1515893000000004
[H]C1=C([H])C(C2C(=NC(Cl)=C(C=2[H])C2=C([H])C([H])=C(C(=C2[H])[N+](=O)[O-])C([H])([H])[H])C([H])([H])[H])=C(C(=C1[H])[N+](=O)[O-])C([H])([H])[H]	3.26106	7.054007	2.541668	6.96874637	1.64353456	3.2514798000000003
[H]C1=NC2=NN([H])C(C3=NC([H])=C(C4C([H])=NC5=NN([H])C([H])=C5C=4[H])C(=C3[H])[N+](=O)[O-])=C2C([H])=C1[H]	2.3962	6.650695000000002	3.1033280000000003	6.601732450000002	2.16026176	2.533646
[H]C1=NC2=NN([H])C(C3=C([H])N=C(C([H])=C3[N+](=O)[O-])C3C([H])=NC4=NN([H])C([H])=C4C=3[H])=C2C([H])=C1[H]	2.71326	6.657611	2.950332	6.60802601	2.0195054399999997	2.7968058000000005
[H]C1=C([H])C(C2C([H])=C(C([H])=C(F)C=2Cl)C2C([H])=C(C#N)C(=C([H])C=2[H])N([H])[H])=C(C(C#N)=C1[H])N([H])[H]	2.9531300000000003	6.251478	1.5133839999999998	6.23844498	0.6975132799999999	2.9958979
[H]C1=C([H])C(C2C([H])=C(F)C(Cl)=C(C=2[H])C2C([H])=C(C#N)C(=C([H])C=2[H])N([H])[H])=C(C(C#N)=C1[H])N([H])[H]	3.10751	6.183592	1.4427279999999998	6.17666872	0.6325097599999996	3.1240333000000002
[H]C1=NC(C2=NN([H])C(C3=NC([H])=C(F)C([H])=C3[H])=C2[N+](=O)[O-])=C(F)C([H])=C1[H]	3.0436	7.434023	2.633208	7.31456093	1.72775136	3.0709880000000003
[H]C1=NC(=C(F)C([H])=C1[H])C1=C(C(=NN1[H])C1=NC([H])=C(F)C([H])=C1[H])[N+](=O)[O-]	2.98135	7.4320210000000015	2.760812	7.312739110000002	1.8451470399999996	3.0193205
[H]C1=NC2=NC(=C([H])C([H])=C2C([H])=C1[H])C1=C([H])C(C2=C([H])N=C3N=C([H])C([H])=C([H])C3=C2[H])=C(C(=C1[H])N([H])[H])C([H])([H])[H]	2.9298900000000003	6.013604000000001	2.085808	6.0219796400000005	1.2241433600000002	2.9766087000000003
[H]C1=NC2=NC(=C([H])C([H])=C2C([H])=C1[H])C1C([H])=C(C([H])=C(C=1C([H])([H])[H])N([H])[H])C1=C([H])N=C2N=C([H])C([H])=C([H])C2=C1[H]	2.91495	6.053826000000001	2.083784	6.058581660000001	1.2222812799999998	2.9642085000000002
[H]C1=NC([H])=C(C2C([H])=C(F)C(=C(C3=NC([H])=C([H])C(=C3[N+](=O)[O-])C([H])([H])[H])C=2F)N([H])[H])C(=C1[N+](=O)[O-])C([H])([H])[H]	2.9913099999999995	6.491263	2.6202360000000002	6.45664933	1.71581712	3.0275872999999995
[H]C1=NC([H])=C(C2C(F)=C(C3=NC([H])=C([H])C(=C3[N+](=O)[O-])C([H])([H])[H])C([H])=C(F)C=2N([H])[H])C(=C1[N+](=O)[O-])C([H])([H])[H]	2.60951	6.5265710000000015	2.685556	6.488779610000002	1.7759115200000002	2.7106933000000004
[H]C(=O)C1C([H])=C([H])C(=NC=1C1=C(N=C(C([H])=C1C([H])([H])[H])C([H])([H])[H])C([H])([H])[H])C1C(=NC(=C([H])C=1C([H])([H])[H])C([H])([H])[H])C([H])([H])[H]	2.8693	6.938072999999998	2.478096	6.8632464299999985	1.5850483199999998	2.9263190000000003
[H]C(=O)C1C([H])=C([H])C(=NC=1C1C(=NC(=C([H])C=1C([H])([H])[H])C([H])([H])[H])C([H])([H])[H])C1=C(N=C(C([H])=C1C([H])([H])[H])C([H])([H])[H])C([H])([H])[H]	2.90997	6.930338000000001	2.488032	6.856207580000001	1.59418944	2.9600751
[H]C1=C([H])C(=C(Cl)C(=C1[H])C([H])([H])[H])C1=C([H])C(C2=C([H])C([H])=C(Cl)C(=C2[H])C([H])([H])[H])=C(C(=C1[H])[N+](=O)[O-])C([H])([H])[H]	3.06435	6.852805999999998	2.498612	6.785653459999999	1.6039230399999997	3.0882105
[H]C1=C([H])C(=C(Cl)C(=C1[H])C([H])([H])[H])C1C([H])=C(C([H])=C(C=1C([H])([H])[H])[N+](=O)[O-])C1=C([H])C([H])=C(Cl)C(=C1[H])C([H])([H])[H]	3.13905	6.852442	2.464388	6.785322219999999	1.57243696	3.1502115
[H]C1=C([H])C(C2C([H])=C([H])C(C3=C([H])C([H])=C4C(=C3[H])C(C(=O)N4[H])(C([H])([H])[H])C([H])([H])[H])=C(C=2[H])C([H])([H])[H])=C2C(=C1[H])C(C(=O)N2[H])(C([H])([H])[H])C([H])([H])[H]	3.42042	6.145645	1.1267079999999998	6.14213695	0.3417713600000001	3.3837486
[H]C1=C([H])C(C2C([H])=C([H])C(=C([H])C=2C([H])([H])[H])C2=C([H])C([H])=C3C(=C2[H])C(C(=O)N3[H])(C([H])([H])[H])C([H])([H])[H])=C2C(=C1[H])C(C(=O)N2[H])(C([H])([H])[H])C([H])([H])[H]	3.4370199999999995	6.129629	1.1121720000000002	6.1275623900000005	0.3283982400000003	3.3975266
[H]C1=C([H])C(OC(F)(F)F)=C([H])C(=C1[H])C1C([H])=C(C(F)=C([H])C=1Cl)C1C([H])=C([H])C(OC(F)(F)F)=C([H])C=1[H]	3.73084	6.881744	1.8753119999999999	6.81198704	1.0304870399999997	3.6413972
[H]C1=C([H])C(OC(F)(F)F)=C([H])C(=C1[H])C1=C([H])C(=C(Cl)C([H])=C1F)C1C([H])=C([H])C(OC(F)(F)F)=C([H])C=1[H]	3.73001	6.8468909999999985	1.842468	6.780270809999999	1.0002705599999997	3.6407083
[H]C1=NC([H])=C(C2C([H])=C(C3=NC([H])=C([H])C(=C3[N+](=O)[O-])C([H])([H])[H])C([H])=C(OC([H])(F)F)C=2N([H])[H])C(=C1[N+](=O)[O-])C([H])([H])[H]	2.66595	6.1593860000000005	2.600088	6.15464126	1.6972809599999996	2.7575385
[H]C1=NC([H])=C(C2C([H])=C(OC([H])(F)F)C(=C(C3=NC([H])=C([H])C(=C3[N+](=O)[O-])C([H])([H])[H])C=2[H])N([H])[H])C(=C1[N+](=O)[O-])C([H])([H])[H]	2.66346	6.254663000000001	2.520968	6.241343330000001	1.62449056	2.7554718000000005
[H]C1=C([H])C(=C(C2C([H])=C(C([H])=C(C=2N([H])[H])C(F)(F)F)C2C([H])=C([H])C(=C([H])C=2C([H])([H])[H])N([H])[H])C(=C1[H])C([H])([H])[H])N([H])[H]	3.1888499999999995	5.767904	1.2610279999999996	5.798392639999999	0.46534575999999905	3.1915454999999997
[H]C1=C([H])C(=C(C2=C([H])C(C3C([H])=C([H])C(=C([H])C=3C([H])([H])[H])N([H])[H])=C(C(=C2[H])C(F)(F)F)N([H])[H])C(=C1[H])C([H])([H])[H])N([H])[H]	3.3208199999999994	5.684093	1.2452959999999995	5.72212463	0.4508723199999993	3.3010805999999997
[H]C1N=C2C([H])=C([H])C(=C([H])C2=C(C=1[H])C1SC(=C([H])C=1C([H])([H])[H])C([H])([H])[H])C1=C(SC([H])=C1C([H])([H])[H])C([H])([H])[H]	2.9913099999999995	5.995768	1.7669360000000005	6.0057488800000005	0.9307811199999998	3.0275872999999995
[H]C1N=C2C([H])=C([H])C(=C([H])C2=C(C=1[H])C1=C(SC([H])=C1C([H])([H])[H])C([H])([H])[H])C1SC(=C([H])C=1C([H])([H])[H])C([H])([H])[H]	3.07431	6.023978	1.835016	6.03141998	0.9934147199999996	3.0964773
[H]C1=C([H])C(=C2OC([H])([H])C([H])([H])C2=C1[H])C1C([H])=C(C(OC([H])([H])[H])=C([H])C=1F)C1=C([H])C([H])=C2OC([H])([H])C([H])([H])C2=C1[H]	3.32165	5.871826	1.0074759999999996	5.89296166	0.23207791999999916	3.3017695
[H]C1=C([H])C(=C2OC([H])([H])C([H])([H])C2=C1[H])C1=C([H])C(=C(F)C([H])=C1OC([H])([H])[H])C1=C([H])C([H])=C2OC([H])([H])C([H])([H])C2=C1[H]	3.4154400000000003	5.872281	1.089264	5.89337571	0.3073228800000001	3.3796152000000004
[H]C1N=C(C2C([H])=C([H])C(=C(C=2N([H])[H])C([H])([H])[H])C([H])([H])[H])C(=C(C=1[H])C1=C([H])C([H])=C(C(=C1C([H])([H])[H])C([H])([H])[H])N([H])[H])[N+](=O)[O-]	2.47256	6.28715	2.5091919999999996	6.2709065	1.6136566399999994	2.5970248000000002
[H]C1N=C(C2=C([H])C([H])=C(C(=C2C([H])([H])[H])C([H])([H])[H])N([H])[H])C(=C(C=1[H])C1C([H])=C([H])C(=C(C=1N([H])[H])C([H])([H])[H])C([H])([H])[H])[N+](=O)[O-]	2.3447400000000003	6.255391	2.5643	6.24200581	1.6643559999999997	2.4909342000000003
[H]C1N=C(Cl)C(C2C([H])=C(F)C(=C(C=2Cl)C2=C([H])N=C(Cl)C([H])=C2N([H])[H])N([H])[H])=C(C=1[H])N([H])[H]	3.4660699999999998	6.4271080000000005	1.3012319999999995	6.39826828	0.5023334399999992	3.4216381
[H]C1N=C(Cl)C(C2C(Cl)=C(C([H])=C(F)C=2N([H])[H])C2=C([H])N=C(Cl)C([H])=C2N([H])[H])=C(C=1[H])N([H])[H]	3.42042	6.444307	1.2336120000000002	6.41391937	0.4401230399999996	3.3837486
[H]C(=O)C1C(F)=C(C([H])=C([H])C=1C1C([H])=C([H])C([H])=C(C=1[H])C([H])([H])[H])C1C([H])=C([H])C([H])=C([H])C=1C([H])([H])[H]	2.74397	6.637955000000001	2.066488	6.590139050000001	1.2063689599999998	2.8222951000000003
[H]C(=O)C1C(F)=C(C([H])=C([H])C=1C1C([H])=C([H])C([H])=C([H])C=1C([H])([H])[H])C1C([H])=C([H])C([H])=C(C=1[H])C([H])([H])[H]	2.8037300000000003	6.602647	2.10384	6.558008770000001	1.2407328	2.8718959
[H]C1N=C(OC([H])([H])[H])C(=C(OC([H])([H])[H])C=1[H])C1C([H])=C([H])C(C2=C([H])N=C(OC([H])([H])[H])C([H])=C2OC([H])([H])[H])=C(C=1C([H])([H])[H])[N+](=O)[O-]	2.90831	6.715396000000001	2.555928	6.6606103600000015	1.6566537600000002	2.9586973000000003
[H]C1N=C(OC([H])([H])[H])C(=C(OC([H])([H])[H])C=1[H])C1C([H])=C([H])C(C2=C([H])N=C(OC([H])([H])[H])C([H])=C2OC([H])([H])[H])=C(C=1[N+](=O)[O-])C([H])([H])[H]	2.9431700000000003	6.734324000000001	2.5363320000000003	6.677834840000001	1.6386254400000002	2.9876311000000007
[H]C1=NN=C(C([H])=C1[H])C1C([H])=C(C(=O)Cl)C([H])=C(C=1[H])C1C([H])=NN=C([H])C=1[H]	2.76472	6.9763839999999995	2.46356	6.898109439999999	1.5716752	2.8395176
[H]C1=NN=C(C([H])=C1[H])C1=C([H])C(C(=O)Cl)=C([H])C(=C1[H])C1C([H])=NN=C([H])C=1[H]	2.76472	6.988486999999999	2.456016	6.909123169999999	1.5647347199999997	2.8395176
[H]C1=NC([H])=C(N=C1N([H])[H])C1=C([H])C(C2=NC([H])=C([H])N=C2N([H])[H])=C(C(C(=O)C([H])([H])[H])=C1[H])N([H])C(=O)C([H])([H])[H]	2.76887	6.356765	2.220128	6.33425615	1.34771776	2.8429621000000003
[H]C1=NC([H])=C(N=C1N([H])[H])C1C([H])=C(C2=NC([H])=C([H])N=C2N([H])[H])C([H])=C(C(=O)C([H])([H])[H])C=1N([H])C(=O)C([H])([H])[H]	2.83029	6.423559	2.217184	6.39503869	1.3450092800000002	2.8939407000000004
[H]C1=NC([H])=C(C2=NSN=C12)C1=C(C(F)=C([H])C(C2=NC([H])=C([H])C3=NSN=C32)=C1C(F)(F)F)N([H])[H]	2.61781	6.368595	3.456976	6.34502145	2.48561792	2.7175823
[H]C1=NC([H])=C(C2=NSN=C12)C1C([H])=C(F)C(=C(C2=NC([H])=C([H])C3=NSN=C32)C=1C(F)(F)F)N([H])[H]	2.63026	6.407725	3.407572	6.380629750000001	2.44016624	2.7279158
[H]C1N=C2C(=C([H])C=1[H])C(C1N=C(C3=C([H])N=C4C(=C3[H])C([H])=C([H])N4[H])C(=C([H])C=1OC([H])([H])C([H])([H])[H])N([H])[H])=C([H])N2[H]	2.94234	5.510465	1.2986559999999994	5.56412315	0.49996351999999966	2.9869422000000005
[H]C1N=C2C(=C([H])C=1[H])C(C1=NC(=C(OC([H])([H])C([H])([H])[H])C([H])=C1N([H])[H])C1=C([H])N=C3C(=C1[H])C([H])=C([H])N3[H])=C([H])N2[H]	2.8352699999999995	5.502548	1.2486999999999997	5.55691868	0.4540039999999994	2.8980740999999997
[H]C1=NC(C2C(Cl)=C([H])C(C3=NC([H])=C(C(=C3[H])C([H])([H])[H])N([H])[H])=C(C=2Cl)C([H])([H])[H])=C(C(=C1[H])C([H])([H])[H])N([H])[H]	3.2809800000000005	6.285876	1.490844	6.26974716	0.67677648	3.2680134000000005
[H]C1=NC(C2C([H])=C(Cl)C(C3=NC([H])=C(C(=C3[H])C([H])([H])[H])N([H])[H])=C(Cl)C=2C([H])([H])[H])=C(C(=C1[H])C([H])([H])[H])N([H])[H]	3.3648099999999994	6.2465639999999985	1.4779639999999998	6.233973239999998	0.6649268800000003	3.3375923
[H]C1N=C(C([H])=C(C=1[H])C1C([H])=C([H])C(C2N=C(C([H])=C([H])C=2[H])C([H])([H])[H])=C(C=1[H])N([H])C(=S)C1C([H])=C([H])C([H])=C([H])C=1[H])C([H])([H])[H]	2.3181800000000004	5.954545	2.206604	5.96823595	1.3352756799999996	2.4688894000000006
[H]C1N=C(C([H])=C(C=1[H])C1C([H])=C([H])C(=C([H])C=1N([H])C(=S)C1C([H])=C([H])C([H])=C([H])C=1[H])C1N=C(C([H])=C([H])C=1[H])C([H])([H])[H])C([H])([H])[H]	2.28166	6.073937000000001	2.358312	6.076882670000001	1.4748470400000002	2.4385778
[H]C1=C([H])C([H])=C(C(=S)N([H])C2C([H])=C(C([H])=C([H])C=2[H])C2C([H])=C(C3C([H])=C([H])C([H])=C([H])C=3N([H])C(=S)C3C([H])=C([H])C([H])=C([H])C=3[H])C(=C(C=2F)C([H])([H])[H])N([H])[H])C([H])=C1[H]	2.24182	5.862635	2.093996	5.8845978500000005	1.23167632	2.4055106000000004
[H]C1=C([H])C([H])=C(C(=S)N([H])C2C([H])=C(C([H])=C([H])C=2[H])C2=C([H])C(=C(F)C(=C2N([H])[H])C([H])([H])[H])C2C([H])=C([H])C([H])=C([H])C=2N([H])C(=S)C2C([H])=C([H])C([H])=C([H])C=2[H])C([H])=C1[H]	2.1978299999999997	6.009144999999999	2.2311680000000003	6.01792195	1.35787456	2.3689989
[H]C1=C(F)C(=C([H])C(=C1C1=NC(=C(OC([H])([H])[H])C([H])=C1[N+](=O)[O-])C1=C(C(F)=C([H])C([H])=C1C(F)(F)F)N([H])[H])C(F)(F)F)N([H])[H]	2.2907900000000003	6.492901	2.972412	6.45813991	2.03981904	2.4461557000000003
[H]C1=C(F)C(=C([H])C(=C1C1N=C(C2=C(C(F)=C([H])C([H])=C2C(F)(F)F)N([H])[H])C(=C([H])C=1OC([H])([H])[H])[N+](=O)[O-])C(F)(F)F)N([H])[H]	2.6277699999999995	6.645963	2.943524	6.59742633	2.01324208	2.7258490999999996
[H]C1C(=NC(=C(C=1[H])C1C([H])=C([H])C(=C([H])C=1[H])C1C([H])=C([H])C([H])=C([H])C=1[H])N([H])[H])C1C([H])=C([H])C([H])=C([H])C=1C1C([H])=C([H])C([H])=C([H])C=1[H]	3.1573099999999994	5.9357989999999985	1.4726280000000005	5.951177089999999	0.6600177599999997	3.1653672999999998
[H]C1C(=NC(=C(C=1[H])C1C([H])=C([H])C([H])=C([H])C=1C1C([H])=C([H])C([H])=C([H])C=1[H])N([H])[H])C1C([H])=C([H])C(=C([H])C=1[H])C1C([H])=C([H])C([H])=C([H])C=1[H]	3.22703	5.919419	1.2642480000000005	5.9362712900000005	0.4683081600000003	3.2232349000000005
[H]C1C([H])=C([H])C(=C(OC([H])(F)F)C=1[H])C1C([H])=C(C(=C(C=1I)C1C([H])=C([H])C([H])=C(OC([H])(F)F)C=1[H])[N+](=O)[O-])C([H])([H])[H]	3.1838699999999998	6.735689000000002	2.456016	6.679076990000001	1.5647347199999997	3.1874121
[H]C1C([H])=C([H])C(=C(OC([H])(F)F)C=1[H])C1C(I)=C(C([H])=C(C=1[N+](=O)[O-])C([H])([H])[H])C1C([H])=C([H])C([H])=C(OC([H])(F)F)C=1[H]	3.1747400000000003	6.770997	2.466596	6.711207270000001	1.5744683199999998	3.1798342
[H]C(=O)C1SC(=NC=1[H])C1C(=NC(F)=C(C=1[H])C1N=C([H])SC=1C([H])=O)C([H])([H])[H]	2.8369299999999997	6.92324	2.895684	6.849748399999999	1.96922928	2.8994519
[H]C(=O)C1SC(=NC=1[H])C1=C(F)N=C(C(=C1[H])C1N=C([H])SC=1C([H])=O)C([H])([H])[H]	2.7979199999999995	6.930338000000001	2.889336	6.856207580000001	1.96338912	2.8670735999999994
[H]C1N=C(C(C2=C([H])C([H])=C(F)C(C#N)=C2N([H])[H])=C(C=1C1C([H])=C([H])C(=C(C#N)C=1F)N([H])[H])C([H])([H])[H])C([H])([H])[H]	3.04692	6.330102	1.4918559999999994	6.30999282	0.6777075199999993	3.0737436000000002
[H]C1N=C(C(C2C([H])=C([H])C(=C(C#N)C=2F)N([H])[H])=C(C=1C1=C([H])C([H])=C(F)C(C#N)=C1N([H])[H])C([H])([H])[H])C([H])([H])[H]	3.1000400000000004	6.364045	1.4683960000000005	6.34088095	0.65612432	3.1178332000000006
[H]C1=NC2C(=NC([H])=C([H])C=2C2C([H])=C(F)C(=C([H])C=2Cl)N([H])[H])C([H])=C1C1C(Cl)=C([H])C([H])=C(F)C=1N([H])[H]	2.90499	6.304349	2.328504	6.28655759	1.44742368	2.9559417000000003
[H]C1=NC2C(=NC([H])=C([H])C=2C2C(Cl)=C([H])C([H])=C(F)C=2N([H])[H])C([H])=C1C1C([H])=C(F)C(=C([H])C=1Cl)N([H])[H]	2.86681	6.351305	2.35316	6.32928755	1.4701071999999997	2.9242523
[H]C1N=C(OC([H])([H])[H])C2C(=NN([H])C=2C2=C(Cl)N=C(C(=C2[H])C2C3=NN([H])C([H])=C3C(=NC=2[H])OC([H])([H])[H])N([H])[H])C=1[H]	2.8693	6.120529	1.984792	6.11928139	1.1312086399999997	2.9263190000000003
[H]C1N=C(OC([H])([H])[H])C2C(=NN([H])C=2C2C(=NC(Cl)=C(C=2[H])C2C3=NN([H])C([H])=C3C(=NC=2[H])OC([H])([H])[H])N([H])[H])C=1[H]	2.85685	6.082673000000001	1.885616	6.0848324300000005	1.0399667199999998	2.9159855000000006
[H]C1=NC([H])=C(C([H])=C1Cl)C1=C([H])C(C2=NC([H])=C([H])C([H])=C2Cl)=C(C(=C1[H])N([H])[H])C([H])([H])[H]	3.30837	6.000136	1.392036	6.00972376	0.5858731199999996	3.2907471
[H]C1N=C(C(Cl)=C([H])C=1C1C([H])=C([H])C([H])=C(C=1C([H])([H])[H])N([H])[H])C1=C([H])C([H])=C(C(=C1[H])N([H])[H])C([H])([H])[H]	3.24114	6.02234	1.396544	6.0299294	0.5900204799999997	3.2349462000000004
[H]C1N=C(C([H])=C(F)C=1C1C(=C([H])C([H])=C(Cl)C=1C([H])([H])[H])N([H])[H])C1C([H])=C(Cl)C(=C([H])C=1N([H])[H])C([H])([H])[H]	3.02368	6.102966	1.6426439999999998	6.10329906	0.8164324799999996	3.0544544
[H]C1N=C(C([H])=C(F)C=1C1C([H])=C(Cl)C(=C([H])C=1N([H])[H])C([H])([H])[H])C1C(=C([H])C([H])=C(Cl)C=1C([H])([H])[H])N([H])[H]	3.1017	6.145281	1.566376	6.14180571	0.7462659199999999	3.119211
[H]C1=C([H])C(C2=NN([H])C(=N2)C2=C([H])C([H])=C(C(=C2[H])C([H])(C([H])([H])[H])C([H])([H])[H])N([H])[H])=C(C(=C1[H])C([H])(C([H])([H])[H])C([H])([H])[H])N([H])[H]	2.90167	5.882382	1.0624000000000002	5.902567619999999	0.28260799999999975	2.9531861000000004
[H]C1=C([H])C(C2=NC(=NN2[H])C2=C([H])C([H])=C(C(=C2[H])C([H])(C([H])([H])[H])C([H])([H])[H])N([H])[H])=C(C(=C1[H])C([H])(C([H])([H])[H])C([H])([H])[H])N([H])[H]	3.03613	5.767085	0.9767479999999996	5.79764735	0.20380815999999946	3.0647879000000002
[H]C1N=C(C([H])=C(C=1F)C1C([H])=C2C(=NC=1C([H])([H])[H])N([H])C([H])=C2[H])C1C2C(=NC(=C([H])C=2[H])C([H])([H])[H])N([H])C=1[H]	3.32248	6.270042	1.5491719999999995	6.2553382200000005	0.7304382399999998	3.3024584
[H]C1N=C(C([H])=C(C=1F)C1C2C(=NC(=C([H])C=2[H])C([H])([H])[H])N([H])C=1[H])C1C([H])=C2C(=NC=1C([H])([H])[H])N([H])C([H])=C2[H]	3.2519299999999998	6.1894160000000005	1.51872	6.1819685600000005	0.7024223999999997	3.2439019
[H]C1=NC(C2C([H])=C([H])C(OC(F)(F)F)=C([H])C=2C2=NC([H])=C([H])N(C2=O)C([H])([H])[H])=C([H])N(C1=O)C([H])([H])[H]	2.67923	6.4131849999999995	2.20458	6.3855983499999995	1.3334136	2.7685609
[H]C1=NC(C2C([H])=C(OC(F)(F)F)C([H])=C([H])C=2C2=NC([H])=C([H])N(C2=O)C([H])([H])[H])=C([H])N(C1=O)C([H])([H])[H]	2.6850400000000003	6.3795150000000005	2.21884	6.35495865	1.3465328000000003	2.7733832000000005
[H]C1=C([H])C2=C(N=C(C([H])=C2C([H])=C1C1C(=C([H])C(=C([H])C=1C([H])([H])[H])N([H])[H])C([H])([H])[H])N([H])[H])C1=C(C([H])=C(C([H])=C1C([H])([H])[H])C([H])([H])[H])N([H])[H]	2.98799	5.663254	1.4446599999999998	5.703161140000001	0.6342871999999993	3.0248317
[H]C1=C([H])C2=C(N=C(C([H])=C2C([H])=C1C1=C(C([H])=C(C([H])=C1C([H])([H])[H])C([H])([H])[H])N([H])[H])N([H])[H])C1C(=C([H])C(=C([H])C=1C([H])([H])[H])N([H])[H])C([H])([H])[H]	2.65682	5.690736	1.504	5.72816976	0.6888800000000002	2.7499606000000005
[H]C1=NC([H])=C(S1)C1C([H])=C([H])C(Cl)=C(C2=NC([H])=C([H])S2)C=1Cl	3.18304	6.584992999999999	2.241748	6.541943629999999	1.3676081599999996	3.1867232000000003
[H]C1=NC([H])=C(S1)C1C(Cl)=C(C2=NC([H])=C([H])S2)C([H])=C([H])C=1Cl	3.09174	6.564972999999999	2.208168	6.523725429999999	1.3367145599999999	3.1109442000000005
[H]C1=NN2C(=N1)C([H])=C([H])C([H])=C2C1C([H])=C(C2=NN3C(=N2)C([H])=C([H])C([H])=C3[H])C([H])=C(C(=O)C([H])([H])[H])C=1N([H])[H]	2.41031	5.942715	1.7908559999999998	5.957470649999999	0.9527875199999993	2.5453573
[H]C1=NN2C(=N1)C([H])=C([H])C([H])=C2C1C([H])=C(C(=O)C([H])([H])[H])C(=C(C2=NN3C(=N2)C([H])=C([H])C([H])=C3[H])C=1[H])N([H])[H]	2.5431099999999995	6.1143410000000005	1.7880040000000001	6.113650310000001	0.9501636800000002	2.6555812999999997
[H]C1=NC(C#N)=C(C2=NC([H])=C(C3=NC(C#N)=C([H])N3C([H])([H])[H])N2[H])N1C([H])([H])[H]	2.70828	6.2956129999999995	2.301548	6.2786078299999994	1.4226241599999998	2.7926724
[H]C1=C([H])C(=C(C([H])=C1N([H])[H])C1C([H])=C2OC([H])([H])C([H])([H])C([H])(C2=C(C=1[H])C1=C([H])C(=C([H])C([H])=C1N([H])[H])[N+](=O)[O-])N([H])[H])[N+](=O)[O-]	2.7232199999999995	6.257484	2.250212	6.24391044	1.37539504	2.8050726
[H]C1=C([H])C(=C(C([H])=C1C([H])([H])[H])C1C([H])=C(C(=C(C2=C([H])C(=C([H])C([H])=C2C([H])([H])[H])C([H])([H])[H])C=1N([H])[H])[N+](=O)[O-])C([H])([H])[H])C([H])([H])[H]	2.3381	6.276685	2.264564	6.261383349999999	1.38859888	2.485423
[H]C1=C([H])C(=C(C([H])=C1C([H])([H])[H])C1C(=C(C([H])=C(C=1[N+](=O)[O-])C([H])([H])[H])C1=C([H])C(=C([H])C([H])=C1C([H])([H])[H])C([H])([H])[H])N([H])[H])C([H])([H])[H]	2.3605099999999997	6.229183	2.272016	6.21815653	1.39545472	2.5040233
[H]C1=C([H])C(C2C([H])=C([H])C(=C(F)C=2Cl)C2=C([H])C([H])=C(C(=C2[H])N([H])[H])C([H])([H])[H])=C(C(=C1[H])N([H])[H])C([H])([H])[H]	3.3407400000000003	5.99868	1.1735360000000004	6.0083988	0.3848531199999998	3.3176142000000004
[H]C1=C([H])C(C2C([H])=C([H])C(=C(Cl)C=2F)C2=C([H])C([H])=C(C(=C2[H])N([H])[H])C([H])([H])[H])=C(C(=C1[H])N([H])[H])C([H])([H])[H]	3.3183300000000004	6.001046	1.1002120000000002	6.01055186	0.3173950400000001	3.2990139000000003
[H]C1C([H])=C([H])C(C2N=C(C3C([H])=C([H])C(C(=O)N([H])[H])=C([H])C=3[H])N([H])C=2C(F)(F)F)=C(C(=O)N([H])[H])C=1[H]	3.23035	6.521566	1.71514	6.48422506	0.8831287999999997	3.2259905
[H]C1C([H])=C([H])C(C2=NC(C3C([H])=C([H])C(C(=O)N([H])[H])=C([H])C=3[H])=C(N2[H])C(F)(F)F)=C(C(=O)N([H])[H])C=1[H]	3.35983	6.599007	1.704468	6.55469637	0.8733105600000002	3.3334589
[H]C1=NC(C2=NC([H])=C(C3=NC([H])=C([H])N=C3N(C([H])([H])[H])C([H])([H])[H])C([H])=C2F)=C([H])N=C1N(C([H])([H])[H])C([H])([H])[H]	2.5306599999999997	5.9364360000000005	2.0721	5.95175676	1.211532	2.6452478
[H]C1=NC(=C([H])N=C1N(C([H])([H])[H])C([H])([H])[H])C1=C([H])N=C(C2=NC([H])=C([H])N=C2N(C([H])([H])[H])C([H])([H])[H])C(F)=C1[H]	2.6277699999999995	6.0591040000000005	2.149932	6.063384640000001	1.28313744	2.7258490999999996
[H]C1=NC(=C(C([H])=C1[H])C1C([H])=C([H])C(=C([H])C=1N([H])C(=O)C1C([H])=C([H])C([H])=C([H])C=1[H])C1C([H])=NC(=C([H])C=1[H])C([H])([H])[H])C([H])([H])[H]	3.32829	6.5237500000000015	1.6043719999999997	6.4862125000000015	0.78122224	3.3072806999999997
[H]C1=NC(=C(C([H])=C1[H])C1C([H])=C([H])C(C2C([H])=NC(=C([H])C=2[H])C([H])([H])[H])=C(C=1[H])N([H])C(=O)C1C([H])=C([H])C([H])=C([H])C=1[H])C([H])([H])[H]	3.34406	6.590725999999999	1.6351	6.547160659999999	0.8094919999999997	3.3203698
[H]C1=NC2=C(C(=C1[H])C1C([H])=C([H])C3SC(=NC=3C=1[H])C1=NC3=C(C([H])=C1[H])N([H])C([H])([H])C([H])([H])C3([H])[H])N([H])C([H])([H])C([H])([H])C2([H])[H]	2.43272	5.67108	1.909904	5.7102828	1.0623116799999996	2.5639576
[H]C1=NC2=C(C(C3=NC4C([H])=C(C5=NC6=C(C([H])=C5[H])N([H])C([H])([H])C([H])([H])C6([H])[H])C([H])=C([H])C=4S3)=C1[H])N([H])C([H])([H])C([H])([H])C2([H])[H]	2.89171	5.833970000000001	1.7679479999999996	5.8585127	0.9317121599999991	2.9449193
[H]C1=NC([H])=C(C(OC([H])([H])[H])=C1[H])C1C([H])=C([H])C(C2C([H])=C([H])C([H])=C([H])C=2[H])=C(C=1[H])C1C([H])=NC([H])=C([H])C=1OC([H])([H])[H]	3.75408	6.450222	1.395992	6.41930202	0.5895126399999997	3.6606864000000003
[H]C1=NC([H])=C(C(OC([H])([H])[H])=C1[H])C1C([H])=C(C([H])=C([H])C=1C1C([H])=C([H])C([H])=C([H])C=1[H])C1C([H])=NC([H])=C([H])C=1OC([H])([H])[H]	3.6993	6.4373	1.25192	6.4075429999999995	0.4569663999999998	3.615219
[H]C1C2=NN([H])C(=C2C([H])=C(C=1[H])C1=C(C([H])=C([H])C([H])=C1C([H])([H])[H])N([H])[H])C1C([H])=C([H])C(=C([H])C=1C([H])([H])[H])N([H])[H]	2.9772	5.693739	1.2078520000000001	5.73090249	0.4164238400000002	3.015876
[H]C1C2=NN([H])C(C3=C(C([H])=C([H])C([H])=C3C([H])([H])[H])N([H])[H])=C2C([H])=C(C=1[H])C1C([H])=C([H])C(=C([H])C=1C([H])([H])[H])N([H])[H]	3.0519	5.533215	1.1564239999999997	5.58482565	0.36911007999999956	3.077877
[H]C1=NC2C(C(Cl)=N1)=C([H])C(=C([H])C=2C1=NC([H])=C([H])N(C1=O)C([H])([H])[H])C1N=C([H])C(=O)N(C=1[H])C([H])([H])[H]	2.59291	6.4559549999999986	2.7273240000000003	6.424519049999999	1.8143380800000002	2.6969153
[H]C1=NC2C(C(Cl)=N1)=C([H])C(C1=NC([H])=C([H])N(C1=O)C([H])([H])[H])=C([H])C=2C1N=C([H])C(=O)N(C=1[H])C([H])([H])[H]	2.67093	6.420647	2.629804	6.39238877	1.72461968	2.7616719
[H]C1=NN(C(=N1)C1=NC([H])=C([H])C(C2=NN(C([H])=N2)C([H])([H])[H])=C1[N+](=O)[O-])C([H])([H])[H]	2.9938	7.551686	2.472944	7.42163426	1.5803084800000002	3.029654
[H]C1=NN(C(=N1)C1C([H])=C([H])N=C(C2=NN(C([H])=N2)C([H])([H])[H])C=1[N+](=O)[O-])C([H])([H])[H]	2.98965	7.556236	2.525936	7.42577476	1.6290611200000003	3.0262095
[H]C1=C([H])C(=C([H])C(=C1[H])[N+](=O)[O-])C1C(=NC(Cl)=C(C=1[H])C1C([H])=C([H])C([H])=C([H])C=1[N+](=O)[O-])C([H])([H])[H]	3.11083	7.0027740000000005	2.63882	6.92212434	1.7329143999999999	3.1267889
[H]C1=C([H])C(=C([H])C(=C1[H])[N+](=O)[O-])C1=C(Cl)N=C(C(=C1[H])C1C([H])=C([H])C([H])=C([H])C=1[N+](=O)[O-])C([H])([H])[H]	3.1598	7.030802	2.60478	6.94762982	1.7015975999999995	3.167434
[H]C1C(=NC2C([H])=C(C([H])=C([H])C=2C=1[H])C1C([H])=C(C(=C([H])C=1N([H])[H])[N+](=O)[O-])C([H])([H])[H])C1C(=C([H])C([H])=C(C=1[N+](=O)[O-])C([H])([H])[H])N([H])[H]	2.3796	6.258393999999999	2.410108	6.244738539999999	1.5224993600000003	2.519868
[H]C1C(=NC2C([H])=C(C([H])=C([H])C=2C=1[H])C1C(=C([H])C([H])=C(C=1[N+](=O)[O-])C([H])([H])[H])N([H])[H])C1C([H])=C(C(=C([H])C=1N([H])[H])[N+](=O)[O-])C([H])([H])[H]	2.31486	6.259213	2.3970439999999997	6.2454838299999995	1.5104804799999996	2.4661338
[H]C1=NC([H])=C(C2=NN([H])C([H])=C12)C1N=C(C(=O)N(C=1[H])C([H])([H])[H])C1=C2C([H])=NC([H])=C([H])C2=NN1[H]	2.32648	6.224178	2.450956	6.21360198	1.56007952	2.4757784000000003
[H]C1=NC([H])=C(C2=NC(C3=C4C([H])=NC([H])=C([H])C4=NN3[H])=C([H])N(C2=O)C([H])([H])[H])C2=NN([H])C([H])=C12	2.29411	6.159204	2.624284	6.154475639999999	1.7195412799999996	2.4489113
[H]C1=NC([H])=C(C(=C1[H])C1C([H])=C(C2=NC([H])=C(C([H])=C2[H])N([H])[H])C([H])=C(C=1C([H])([H])[H])N([H])[H])N([H])[H]	3.2585699999999997	5.739876000000001	1.0172280000000002	5.772887160000001	0.2410497600000001	3.2494131
[H]C1=NC([H])=C(C(=C1[H])C1=C([H])C(C2=NC([H])=C(C([H])=C2[H])N([H])[H])=C(C(=C1[H])N([H])[H])C([H])([H])[H])N([H])[H]	3.1598	5.724679	1.0267959999999998	5.75905789	0.24985231999999957	3.167434
[H]C1N=C(OC([H])([H])[H])C2C(=NN([H])C=2C2C([H])=C([H])C([H])=C3C=2C(=NN3[H])N([H])[H])C=1C1=C([H])C([H])=C2C(=NN([H])C2=C1[H])N([H])[H]	2.6750800000000003	5.771089	1.840352	5.80129099	0.9983238400000003	2.7651164
[H]C1N=C(OC([H])([H])[H])C2C(=NN([H])C=2C2=C([H])C([H])=C3C(=NN([H])C3=C2[H])N([H])[H])C=1C1C([H])=C([H])C([H])=C2C=1C(=NN2[H])N([H])[H]	2.74729	5.817863	1.864272	5.84385533	1.0203302399999998	2.8250507000000002
[H]C1=C([H])C(=C([H])C(=C1[H])[N+](=O)[O-])C1C([H])=C(C(=C([H])C=1F)C1C([H])=C([H])C([H])=C([H])C=1[N+](=O)[O-])[N+](=O)[O-]	3.1465199999999998	7.415914	2.8482119999999997	7.29808174	1.9255550399999999	3.1564116
[H]C1=C([H])C(=C([H])C(=C1[H])[N+](=O)[O-])C1=C([H])C(F)=C(C([H])=C1[N+](=O)[O-])C1C([H])=C([H])C([H])=C([H])C=1[N+](=O)[O-]	3.0934	7.4089979999999995	2.933956	7.291788179999999	2.00443952	3.112322
[H]C1=NC(=C(F)C([H])=C1[H])C1C([H])=C(C2=NC([H])=C(F)C([H])=C2[H])C(F)=C([H])C=1Cl	3.61796	6.7936559999999995	1.81404	6.731826959999999	0.9741168	3.5477068000000003
[H]C1=NC(=C(F)C([H])=C1[H])C1=C([H])C(C2=NC([H])=C(F)C([H])=C2[H])=C(Cl)C([H])=C1F	3.62045	6.782918	1.855256	6.72205538	1.0120355199999995	3.5497735
[H]C1=NC(C2=NN3C(=N2)C([H])=C(C2=NC([H])=C(N2C([H])([H])[H])C([H])([H])[H])C([H])=C3[H])=C(N1C([H])([H])[H])C([H])([H])[H]	3.1672700000000003	5.8907539999999985	1.2108879999999995	5.910186139999999	0.41921695999999997	3.1736341
[H]C1=NC(C2=C([H])C3=NC(=NN3C([H])=C2[H])C2=NC([H])=C(N2C([H])([H])[H])C([H])([H])[H])=C(N1C([H])([H])[H])C([H])([H])[H]	3.2286900000000003	5.883383	1.2196280000000002	5.90347853	0.4272577599999998	3.2246127000000007
[H]C1=NC2C([H])=C(C([H])=C([H])C=2S1)C1=C([H])C(C2=NC3C([H])=C([H])C([H])=C([H])C=3S2)=C(C(=C1[H])C([H])([H])N(C([H])([H])[H])C1([H])C([H])([H])C([H])([H])C([H])([H])C([H])([H])C1([H])[H])N([H])[H]	3.0353	5.761989	1.5811879999999998	5.79300999	0.7598929600000002	3.064099
[H]C1=NC2C([H])=C(C([H])=C([H])C=2S1)C1C([H])=C(C2=NC3C([H])=C([H])C([H])=C([H])C=3S2)C([H])=C(C=1N([H])[H])C([H])([H])N(C([H])([H])[H])C1([H])C([H])([H])C([H])([H])C([H])([H])C([H])([H])C1([H])[H]	2.80871	5.6638910000000005	1.5997719999999995	5.70374081	0.7769902399999999	2.8760293
[H]C1=C(Cl)C(=C([H])C(Cl)=C1C1C([H])=C2OC(F)(F)OC2=C([H])C=1N([H])[H])C1=C2OC(F)(F)OC2=C([H])C([H])=C1N([H])[H]	3.20296	6.307898000000001	1.6613200000000001	6.289787180000001	0.8336144000000001	3.2032568
[H]C1=C(Cl)C(=C([H])C(Cl)=C1C1=C2OC(F)(F)OC2=C([H])C([H])=C1N([H])[H])C1C([H])=C2OC(F)(F)OC2=C([H])C=1N([H])[H]	3.1996400000000005	6.290244	1.689012	6.273722040000001	0.85909104	3.2005012000000006
[H]C1=NC2=C([H])C(=C([H])C([H])=C2C([H])=C1[H])C1C([H])=C([H])C(C2C([H])=C([H])C([H])=C3N=C([H])C([H])=C([H])C=23)=C(C=1Cl)C([H])([H])[H]	3.3764300000000005	6.565792	1.8174439999999998	6.52447072	0.9772484800000001	3.3472369000000004
[H]C1=NC2=C([H])C(=C([H])C([H])=C2C([H])=C1[H])C1C([H])=C([H])C(=C(Cl)C=1C([H])([H])[H])C1C([H])=C([H])C([H])=C2N=C([H])C([H])=C([H])C=12	3.3963499999999995	6.566338000000001	1.8225040000000003	6.524967580000001	0.9819036800000003	3.3637704999999998
[H]C1=NC([H])=C(C(OC([H])([H])[H])=C1[H])C1C([H])=C(F)C(=C([H])C=1Cl)C1C([H])=NC([H])=C([H])C=1OC([H])([H])[H]	3.65448	6.7982059999999995	1.61992	6.7359674599999995	0.7955264	3.5780184
[H]C1=NC([H])=C(C(OC([H])([H])[H])=C1[H])C1=C([H])C(Cl)=C(C([H])=C1F)C1C([H])=NC([H])=C([H])C=1OC([H])([H])[H]	3.58144	6.785102	1.53344	6.72404282	0.7159647999999992	3.5173952
[H]C(=O)C1=C([H])C([H])=C(C([H])=C1F)C1C([H])=C(C([H])=C([H])C=1C(=O)N([H])[H])C1C([H])=C([H])C([H])=C(F)C=1C([H])=O	2.7057900000000004	6.946718	2.353712	6.87111338	1.4706150399999998	2.7906057000000004
[H]C(=O)C1C(F)=C([H])C(=C([H])C=1C1C([H])=C([H])C([H])=C([H])C=1C(=O)N([H])[H])C1C([H])=C([H])C(C(=O)N([H])[H])=C([H])C=1[H]	2.72986	6.957274000000001	2.332184	6.880719340000001	1.4508092799999996	2.8105838
[H]C1=NC([H])=C(C2=NN([H])C([H])=C12)C1N=C(C2=NC([H])=C([H])N2C=1[H])C1=C2C([H])=NC([H])=C([H])C2=NN1[H]	2.5622	6.4163700000000015	2.404128	6.388496700000001	1.5169977599999998	2.6714260000000003
[H]C1=NC([H])=C(C2=NC(C3=C4C([H])=NC([H])=C([H])C4=NN3[H])=C([H])N3C2=NC([H])=C3[H])C2=NN([H])C([H])=C12	2.51821	6.294339	2.478372	6.277448489999999	1.5853022399999999	2.6349143
[H]C1N=C(C([H])=C(C=1C1C([H])=C(Cl)C(Cl)=C([H])C=1[H])[N+](=O)[O-])C1C([H])=C([H])C([H])=C(Cl)C=1Cl	2.90748	7.183681999999999	3.05742	7.086750619999999	2.1180263999999998	2.9580084
[H]C1N=C(C([H])=C(C=1C1C([H])=C([H])C([H])=C(Cl)C=1Cl)[N+](=O)[O-])C1C([H])=C(Cl)C(Cl)=C([H])C=1[H]	2.79543	7.146099	3.0243	7.05255009	2.087556	2.8650069
[H]C1C(=O)N(C(=C(C=1[H])C1=C([H])C(F)=C(C([H])=C1C#N)C1C(=O)N(C(=C([H])C=1[H])C([H])([H])[H])C([H])([H])[H])C([H])([H])[H])C([H])([H])[H]	2.8518699999999995	6.186959	1.872368	6.17973269	1.0277785599999998	2.9118521
[H]C1C(=O)N(C(=C(C=1[H])C1C([H])=C(C#N)C(=C([H])C=1F)C1C(=O)N(C(=C([H])C=1[H])C([H])([H])[H])C([H])([H])[H])C([H])([H])[H])C([H])([H])[H]	2.93487	6.198971	1.8122	6.1906636100000005	0.9724239999999993	2.9807421000000005
[H]C1=C([H])C(=C(Cl)C(Cl)=C1C1C([H])=C(C([H])=C2C=1C(=O)C(=O)N2[H])C1=C([H])C([H])=C(Cl)C(Cl)=C1N([H])[H])N([H])[H]	1.7670599999999996	6.415005000000001	3.08272	6.387254550000001	2.1413024	2.0114598
[H]C1=C([H])C(=C(Cl)C(Cl)=C1C1=C([H])C(C2=C([H])C([H])=C(Cl)C(Cl)=C2N([H])[H])=C2C(=O)C(=O)N([H])C2=C1[H])N([H])[H]	1.88575	6.433569	3.079224	6.404147790000001	2.13808608	2.1099725
[H]SC1C([H])=C([H])C(=C([H])C=1[H])C1C([H])=C([H])C(C2C([H])=C([H])C([H])=C([H])C=2S[H])=C(C=1[H])N([H])C(=S)C1C([H])=C([H])C([H])=C([H])C=1[H]	2.3215	5.912048	2.161892	5.92956368	1.2941406400000002	2.471645
[H]SC1C([H])=C([H])C(=C([H])C=1[H])C1C([H])=C([H])C(=C([H])C=1N([H])C(=S)C1C([H])=C([H])C([H])=C([H])C=1[H])C1C([H])=C([H])C([H])=C([H])C=1S[H]	2.19451	5.9367090000000005	2.1817640000000003	5.95200519	1.3124228799999997	2.3662433000000003
[H]C1=C([H])C(=C(F)C(=C1[H])C([H])([H])[H])C1C([H])=C([H])C(=C(Cl)C=1F)C1=C([H])C([H])=C(F)C(=C1[H])C([H])([H])[H]	3.70926	6.727499000000001	1.456988	6.671624090000001	0.6456289599999998	3.6234858
[H]C1=C([H])C(=C(F)C(=C1[H])C([H])([H])[H])C1C([H])=C([H])C(=C(F)C=1Cl)C1=C([H])C([H])=C(F)C(=C1[H])C([H])([H])[H]	3.76819	6.728955	1.4793439999999998	6.67294905	0.66619648	3.6723977000000003
[H]C1N=C(C(C#N)=C([H])C=1C1C(F)=C([H])C([H])=C([H])C=1N([H])[H])C1C([H])=C([H])C(=C([H])C=1F)N([H])[H]	2.95479	6.095777	1.8374080000000002	6.09675707	0.9956153599999995	2.9972757000000003
[H]C1N=C(C(C#N)=C([H])C=1C1C([H])=C([H])C(=C([H])C=1F)N([H])[H])C1C(F)=C([H])C([H])=C([H])C=1N([H])[H]	3.1913400000000003	6.099508	1.7973879999999998	6.10015228	0.9587969599999999	3.1936122000000005
[H]C1C([H])=C([H])C(C2C(=NC(Cl)=C(C=2[H])C2C([H])=C([H])C(C(=O)N([H])[H])=C([H])C=2[H])N([H])[H])=C(C(=O)N([H])[H])C=1[H]	3.2677	6.223905	1.582936	6.21335355	0.7615011200000001	3.256991
[H]C1C([H])=C([H])C(C2=C(Cl)N=C(C(=C2[H])C2C([H])=C([H])C(C(=O)N([H])[H])=C([H])C=2[H])N([H])[H])=C(C(=O)N([H])[H])C=1[H]	3.3448900000000004	6.333469	1.5774160000000004	6.31305679	0.7564227200000007	3.3210587000000005
[H]C1=C([H])C(=C([H])C(F)=C1C1C([H])=C2OC(F)(F)OC2=C(C2=C([H])C([H])=C(F)C([H])=C2N([H])[H])C=1N([H])[H])N([H])[H]	3.0768	5.911956999999999	1.424512	5.929480869999999	0.6157510400000001	3.0985440000000004
[H]C1=C([H])C(=C([H])C(F)=C1C1=C2OC(F)(F)OC2=C([H])C(C2=C([H])C([H])=C(F)C([H])=C2N([H])[H])=C1N([H])[H])N([H])[H]	3.0045900000000003	5.9262440000000005	1.5306800000000005	5.942482040000001	0.7134255999999999	3.0386097000000003
[H]C1=NC(C2=C([H])C(C3=NC([H])=C(S3)C([H])([H])[H])=C3C([H])=NN([H])C3=C2[H])=C(S1)C([H])([H])[H]	3.0519	5.9112290000000005	1.7386919999999997	5.92881839	0.9047966399999998	3.077877
[H]C1=NC(C2C([H])=C(C3=NC([H])=C(S3)C([H])([H])[H])C([H])=C3C=2C([H])=NN3[H])=C(S1)C([H])([H])[H]	2.94151	5.889753	1.772456	5.9092752299999995	0.9358595200000002	2.9862533000000004
[H]C1N=C2C(=C([H])C(Cl)=NN2C=1[H])C1=C2C(=NN1[H])C([H])=C([H])C(=C2[H])C1=C([H])N=C2C([H])=C([H])C(Cl)=NN21	2.39537	5.886932	2.308724	5.906708119999999	1.4292260800000003	2.5329571000000004
[H]C1N=C2C(=C([H])C(Cl)=NN2C=1[H])C1C([H])=C([H])C2=NN([H])C(=C2C=1[H])C1=C([H])N=C2C([H])=C([H])C(Cl)=NN21	2.4816900000000004	6.087314	2.4996240000000003	6.08905574	1.60485408	2.6046027000000005
[H]C1=NC([H])=C(C2=C([H])C([H])=C([H])C([H])=C12)C1C([H])=C(C(=NC=1C([H])([H])[H])C1=NC([H])=C([H])C2=C([H])C([H])=C([H])C([H])=C12)C([H])([H])[H]	3.0444299999999997	6.3520330000000005	2.022972	6.329950030000001	1.1663342400000003	3.0716769
[H]C1=NC([H])=C(C2=NC(=C(C3=NC([H])=C([H])C4=C([H])C([H])=C([H])C([H])=C34)C([H])=C2C([H])([H])[H])C([H])([H])[H])C2=C([H])C([H])=C([H])C([H])=C12	2.99463	6.3520330000000005	2.024444	6.329950030000001	1.1676884799999998	3.0303429
[H]C1=C([H])C(C2C([H])=C(C([H])=C(C=2N([H])[H])C([H])([H])C([H])([H])[H])C2C([H])=C(OC([H])(F)F)C(=C([H])C=2[H])N([H])[H])=C(C(OC([H])(F)F)=C1[H])N([H])[H]	3.27849	5.59828	1.103708	5.6440348	0.32061136	3.2659467
[H]C1=C([H])C(C2=C([H])C(C3C([H])=C(OC([H])(F)F)C(=C([H])C=3[H])N([H])[H])=C(C(=C2[H])C([H])([H])C([H])([H])[H])N([H])[H])=C(C(OC([H])(F)F)=C1[H])N([H])[H]	3.2436300000000005	5.5545089999999995	1.1655319999999998	5.60420319	0.37748943999999973	3.2370129000000007
[H]C1SC(=C(C2=NC(C3SC(=C([H])C=3C([H])([H])[H])C([H])([H])[H])=C(N2[H])C([H])([H])[H])C=1C([H])([H])[H])C([H])([H])[H]	3.0759699999999994	5.43175	1.082916	5.4924925	0.3014827200000001	3.0978550999999994
[H]C1SC(=C(C2N=C(C3SC(=C([H])C=3C([H])([H])[H])C([H])([H])[H])N([H])C=2C([H])([H])[H])C=1C([H])([H])[H])C([H])([H])[H]	3.2942599999999995	5.263673000000001	1.0124439999999997	5.339542430000001	0.2366484799999995	3.2790358
[H]C1C([H])=C([H])C2=C(C3=NSN=C3C(C3=C([H])C([H])=C(F)C(F)=C3OC([H])([H])[H])=C2C=1[H])C1C([H])=C([H])C(OC([H])([H])[H])=C(F)C=1F	2.0891	6.064837000000001	3.3331440000000003	6.0686016700000005	2.37169248	2.278753
[H]C1C([H])=C([H])C2=C(C3=NSN=C3C(C3=C([H])C([H])=C(F)C(F)=C3OC([H])([H])[H])=C2C=1[H])C1C([H])=C([H])C(OC([H])([H])[H])=C(F)C=1F	2.16712	6.043088000000001	3.284568	6.048810080000001	2.3270025600000004	2.3435096000000004
[H]C1N=C(C(F)=C([H])C=1C1C([H])=C([H])C([H])=C(C=1Cl)C([H])([H])[H])C1C([H])=C([H])C([H])=C(Cl)C=1C([H])([H])[H]	3.64037	6.7367810000000015	1.8025400000000003	6.680070710000001	0.9635368	3.5663071
[H]C1N=C(C(F)=C([H])C=1C1C([H])=C([H])C([H])=C(Cl)C=1C([H])([H])[H])C1C([H])=C([H])C([H])=C(C=1Cl)C([H])([H])[H]	3.49512	6.700653999999999	1.918552	6.647195139999999	1.0702678399999996	3.4457496
[H]C1=C([H])C(C2=NC3=C(C(=C2[H])C2C([H])=C(C#N)C(F)=C([H])C=2[H])N([H])C([H])([H])C([H])([H])C3([H])[H])=C(F)C(C#N)=C1[H]	2.88424	5.967103	1.6776959999999999	5.9796637299999995	0.8486803199999997	2.9387192000000004
[H]C1=C([H])C(=C(F)C(C#N)=C1[H])C1=C([H])C(=NC2=C1N([H])C([H])([H])C([H])([H])C2([H])[H])C1C([H])=C(C#N)C(F)=C([H])C=1[H]	2.86349	5.990581	1.660584	6.00102871	0.8329372800000003	2.9214967000000005
[H]C1C(=NC(=C(C=1[H])C1C([H])=C(C([H])=C([H])C=1C([H])([H])C#N)C1C(=NC(=C([H])C=1[H])N([H])[H])C([H])([H])[H])N([H])[H])C([H])([H])[H]	3.27932	6.037719	0.9446399999999996	6.04392429	0.17426879999999922	3.2666356
[H]C1C(=NC(=C(C=1[H])C1C([H])=C([H])C(=C(C=1[H])C1C(=NC(=C([H])C=1[H])N([H])[H])C([H])([H])[H])C([H])([H])C#N)N([H])[H])C([H])([H])[H]	3.43785	6.092137	0.9002959999999999	6.09344467	0.1334723200000001	3.3982155
[H]C1N=C(C(C#N)=C(C=1[H])C1C([H])=C([H])C([H])=C(C=1[H])C(F)(F)F)C1C([H])=C([H])C([H])=C([H])C=1C(F)(F)F	3.64037	7.295976	2.153244	7.188938159999999	1.2861844800000002	3.5663071
[H]C1N=C(C(C#N)=C(C=1[H])C1C([H])=C([H])C([H])=C([H])C=1C(F)(F)F)C1C([H])=C([H])C([H])=C(C=1[H])C(F)(F)F	3.6976400000000003	7.362678999999999	2.233376	7.249637889999999	1.35990592	3.6138412000000004
[H]C1=NC(=C(C([H])=C1[H])C1C([H])=C(C(=C([H])C=1[N+](=O)[O-])C1C([H])=NC(=C([H])C=1[H])C([H])([H])C([H])([H])[H])C([H])([H])[H])C([H])([H])C([H])([H])[H]	2.95811	6.9367990000000015	2.4851799999999997	6.862087090000001	1.5915655999999996	3.0000313
[H]C1=NC(=C(C([H])=C1[H])C1=C([H])C(=C(C([H])=C1C([H])([H])[H])C1C([H])=NC(=C([H])C=1[H])C([H])([H])C([H])([H])[H])[N+](=O)[O-])C([H])([H])C([H])([H])[H]	3.1166400000000003	6.962006	2.513608	6.88502546	1.6177193599999997	3.1316112000000005
[H]C1N=C(C(C2C([H])=C(F)C(=C(C=2F)C2=C([H])N=C(C([H])=C2C(F)(F)F)N([H])[H])N([H])[H])=C(C=1[H])C(F)(F)F)N([H])[H]	3.25359	6.168122	1.812844	6.162591020000001	0.9730164800000001	3.2452797
[H]C1N=C(C(C2C(F)=C(C([H])=C(F)C=2N([H])[H])C2=C([H])N=C(C([H])=C2C(F)(F)F)N([H])[H])=C(C=1[H])C(F)(F)F)N([H])[H]	3.21043	6.119528	1.7671200000000002	6.118370479999999	0.9309504000000004	3.2094569
[H]C1=NC(C2C(F)=C(C3=NC([H])=C([H])N4C3=NC(=C4[H])C([H])([H])[H])C([H])=C(Cl)C=2N([H])[H])=C([H])N2C1=NC(=C2[H])C([H])([H])[H]	2.8527	6.148283999999999	1.863628	6.14453844	1.01973776	2.912541
[H]C1=NC(C2C([H])=C(Cl)C(=C(C3=NC([H])=C([H])N4C3=NC(=C4[H])C([H])([H])[H])C=2F)N([H])[H])=C([H])N2C1=NC(=C2[H])C([H])([H])[H]	2.92076	6.069933	1.8563599999999998	6.07323903	1.0130511999999996	2.9690308
[H]C1=NC(OC([H])([H])C2C([H])=C([H])C([H])=C([H])C=2[H])=C(C([H])=C1[H])C1=C(Cl)N=C(C(=C1[H])C1C([H])=NC(OC([H])([H])C2C([H])=C([H])C([H])=C([H])C=2[H])=C([H])C=1[H])C([H])([H])[H]	3.68851	6.533851	1.559568	6.495404410000001	0.7400025599999998	3.6062633
[H]C1=NC(OC([H])([H])C2C([H])=C([H])C([H])=C([H])C=2[H])=C(C([H])=C1[H])C1C(=NC(Cl)=C(C=1[H])C1C([H])=NC(OC([H])([H])C2C([H])=C([H])C([H])=C([H])C=2[H])=C([H])C=1[H])C([H])([H])[H]	3.6495	6.556419	1.5114519999999998	6.515941290000001	0.6957358399999993	3.573885
[H]C1=C([H])C(=C(F)C(C#N)=C1[H])C1C([H])=C(C([H])=C(OC([H])(F)F)C=1N([H])[H])C1C([H])=C(C#N)C(F)=C([H])C=1[H]	3.17889	6.020429	1.588088	6.02819039	0.7662409600000002	3.1832787000000002
[H]C1=C([H])C(=C(F)C(C#N)=C1[H])C1C([H])=C(OC([H])(F)F)C(=C(C=1[H])C1C([H])=C(C#N)C(F)=C([H])C=1[H])N([H])[H]	3.1838699999999998	5.98776	1.5924120000000002	5.9984616	0.7702190400000006	3.1874121
[H]C1=C([H])C(C2=C([H])C(=C(C([H])=C2N([H])C(=O)C([H])([H])[H])C2=C([H])C([H])=C(C(=C2[H])C([H])([H])[H])C([H])([H])[H])[N+](=O)[O-])=C(C(=C1[H])C([H])([H])[H])C([H])([H])[H]	2.75227	6.828873	2.591072	6.7638744299999995	1.6889862400000002	2.8291841000000004
[H]C1=C([H])C(C2C([H])=C(C(=C([H])C=2[N+](=O)[O-])C2=C([H])C([H])=C(C(=C2[H])C([H])([H])[H])C([H])([H])[H])N([H])C(=O)C([H])([H])[H])=C(C(=C1[H])C([H])([H])[H])C([H])([H])[H]	2.65931	6.829692	2.67792	6.76461972	1.7688863999999995	2.7520273
[H]C1=NN2C(=N1)C([H])=C([H])C([H])=C2C1C([H])=C(C2=NN3C(=N2)C([H])=C([H])C([H])=C3[H])C([H])=C(F)C=1C#N	3.22703	6.719764	2.28324	6.664585239999999	1.4057808	3.2232349000000005
[H]C1=NN2C(=N1)C([H])=C([H])C([H])=C2C1C([H])=C(F)C(C#N)=C(C2=NN3C(=N2)C([H])=C([H])C([H])=C3[H])C=1[H]	3.31003	6.799480000000001	2.1939079999999995	6.7371268	1.3235953599999997	3.2921249
[H]C1N=C(C([H])=C([H])C=1C1C([H])=C(C#N)C([H])=C([H])C=1F)C1=C([H])C(F)=C([H])C([H])=C1C#N	3.2494400000000003	6.759894999999999	2.227856	6.701104449999999	1.3548275199999997	3.2418352000000006
[H]C1N=C(C([H])=C([H])C=1C1=C([H])C(F)=C([H])C([H])=C1C#N)C1C([H])=C(C#N)C([H])=C([H])C=1F	3.2876199999999995	6.799480000000001	2.246348	6.7371268	1.3718401599999996	3.2735246
[H]C1=C2OC(F)(F)OC2=C([H])C(=C1C1C([H])=C(C([H])=C(OC(F)(F)F)C=1N([H])[H])C1=C2OC(F)(F)OC2=C([H])C([H])=C1N([H])[H])N([H])[H]	3.01621	5.93771	1.9119279999999998	5.9529160999999995	1.0641737599999992	3.0482543
[H]C1=C2OC(F)(F)OC2=C([H])C(=C1C1C([H])=C(OC(F)(F)F)C(=C(C=1[H])C1=C2OC(F)(F)OC2=C([H])C([H])=C1N([H])[H])N([H])[H])N([H])[H]	2.86349	6.008144000000001	2.115708	6.017011040000001	1.2516513600000003	2.9214967000000005
[H]C1=C([H])C([H])=C(C(=S)N([H])C2C([H])=C(C([H])=C([H])C=2C2C([H])=C([H])C(OC([H])([H])[H])=C(F)C=2F)C2=C([H])C([H])=C(F)C(F)=C2OC([H])([H])[H])C([H])=C1[H]	2.27917	6.0361720000000005	2.2481880000000003	6.04251652	1.3735329600000004	2.4365111
[H]C1=C([H])C([H])=C(C(=S)N([H])C2C([H])=C(C([H])=C([H])C=2C2=C([H])C([H])=C(F)C(F)=C2OC([H])([H])[H])C2C([H])=C([H])C(OC([H])([H])[H])=C(F)C=2F)C([H])=C1[H]	2.28249	5.984302	2.201636	5.995314819999999	1.3307051200000002	2.4392667
[H]C1=NC(=C(C([H])=C1C1C([H])=C([H])C([H])=C(C#N)C=1N([H])[H])C1C([H])=C(C#N)C(=C([H])C=1[H])N([H])[H])C([H])([H])[H]	3.1307500000000004	6.170033	1.314388	6.16433003	0.5144369600000003	3.1433225000000005
[H]C1=NC(=C(C([H])=C1C1C([H])=C(C#N)C(=C([H])C=1[H])N([H])[H])C1C([H])=C([H])C([H])=C(C#N)C=1N([H])[H])C([H])([H])[H]	2.99546	6.1061510000000006	1.3393199999999998	6.10619741	0.5373744	3.0310318
[H]C1=NN2C(=N1)C(=C([H])C([H])=C2[H])C1C([H])=C(C([H])=C2C([H])=C([H])N([H])C=12)C1C([H])=C([H])C2=NC([H])=NN2C=1[H]	3.20711	5.825325	1.261672	5.85064575	0.46593823999999984	3.2067013
[H]C1=NN2C(=N1)C(=C([H])C([H])=C2[H])C1=C([H])C(C2C([H])=C([H])C3=NC([H])=NN3C=2[H])=C2C(=C1[H])C([H])=C([H])N2[H]	2.91495	5.819501	1.3519239999999997	5.84534591	0.5489700799999992	2.9642085000000002
[H]C1=NN([H])C(=N1)C1=C(Cl)N=C(C(C2=NN([H])C([H])=N2)=C1[H])C([H])([H])[H]	3.5167	6.8117649999999985	1.84486	6.748306149999999	1.0024711999999996	3.463661
[H]C1=NN([H])C(=N1)C1C(=NC(Cl)=C(C2=NN([H])C([H])=N2)C=1[H])C([H])([H])[H]	3.59389	6.912411	1.8782560000000004	6.83989401	1.0331955200000005	3.5277287
[H]C1=NC(C#N)=C(C2=C([H])N=C(C3=NC(C#N)=C([H])N3C([H])([H])[H])N2[H])N1C([H])([H])[H]	2.72654	6.05328	1.775032	6.0580848	0.9382294399999997	2.8078282000000003
[H]C1=NC(C#N)=C(C2=NC([H])=C(C3=NC(C#N)=C([H])N3C([H])([H])[H])N2[H])N1C([H])([H])[H]	2.71326	6.050186	1.749548	6.05526926	0.91478416	2.7968058000000005
[H]C1=NC(C2C([H])=C([H])C(C3=NC([H])=C(N3C([H])([H])[H])C([H])([H])[H])=C([H])C=2C#N)=C(N1C([H])([H])[H])C([H])([H])[H]	3.0427699999999995	5.889389	1.5122799999999996	5.908943990000001	0.6964975999999998	3.0702990999999997
[H]C1=NC(C2C([H])=C([H])C(C3=NC([H])=C(N3C([H])([H])[H])C([H])([H])[H])=C(C#N)C=2[H])=C(N1C([H])([H])[H])C([H])([H])[H]	3.027	5.820411	1.3991200000000001	5.84617401	0.5923904000000002	3.0572100000000004
[H]C1=NC(C2=C([H])C(C3=NC([H])=C(S3)C([H])([H])[H])=C(Cl)C(=C2[H])C([H])([H])[H])=C(S1)C([H])([H])[H]	3.3141800000000003	6.230093	1.8436639999999995	6.21898463	1.0013708799999996	3.2955694000000006
[H]C1=NC(C2C([H])=C(C3=NC([H])=C(S3)C([H])([H])[H])C([H])=C(C=2Cl)C([H])([H])[H])=C(S1)C([H])([H])[H]	3.1905099999999997	6.1769490000000005	1.7717200000000002	6.17062359	0.9351824000000004	3.1929233
[H]C1C([H])=C(F)C(=C(C=1F)C1C([H])=C(C([H])=C2C([H])=C([H])N([H])C=12)C1C([H])=C(F)C(=C([H])C=1F)N([H])[H])N([H])[H]	3.28264	5.6633450000000005	0.9574280000000002	5.703243950000001	0.18603375999999994	3.2693912
[H]C1C([H])=C(F)C(=C(C=1F)C1=C([H])C(C2C([H])=C(F)C(=C([H])C=2F)N([H])[H])=C2C(=C1[H])C([H])=C([H])N2[H])N([H])[H]	3.1299200000000003	5.720948	0.942984	5.75566268	0.17274528	3.1426336000000004
[H]C1N=C(C2C([H])=C([H])C([H])=C(C=2[H])C([H])([H])C([H])([H])[H])N(C=1C1C([H])=C([H])C([H])=C([H])C=1C([H])([H])C([H])([H])[H])C([H])([H])[H]	3.39386	5.848621	0.9677319999999998	5.87184511	0.19551344000000004	3.3617038
[H]C1N=C(C2C([H])=C([H])C([H])=C([H])C=2C([H])([H])C([H])([H])[H])N(C=1C1C([H])=C([H])C([H])=C(C=1[H])C([H])([H])C([H])([H])[H])C([H])([H])[H]	3.12743	5.796113999999998	1.038296	5.824063739999999	0.2604323199999996	3.1405669
[H]C1=C([H])C(=C(Cl)C(Cl)=C1C1C([H])=C(C2=C([H])C([H])=C(Cl)C(Cl)=C2N([H])[H])C(=C([H])C=1F)N([H])[H])N([H])[H]	3.26189	5.924424	1.108492	5.9408258400000005	0.32501263999999974	3.2521687000000004
[H]C1=C([H])C(=C(Cl)C(Cl)=C1C1=C([H])C(=C(F)C([H])=C1N([H])[H])C1=C([H])C([H])=C(Cl)C(Cl)=C1N([H])[H])N([H])[H]	3.31916	5.94681	1.1016839999999997	5.9611971	0.3187492799999996	3.2997028000000004
[H]C1N=C(C([H])=C2C([H])=C(C([H])=C([H])C=12)C1C(=C(C([H])=C(C=1C([H])([H])[H])C([H])([H])[H])C1N=C(C([H])=C2C([H])=C([H])C([H])=C([H])C=12)N([H])[H])N([H])[H])N([H])[H]	2.83776	5.702838999999999	1.5609479999999998	5.739183489999999	0.7412721599999994	2.9001408
[H]C1N=C(C([H])=C2C([H])=C(C([H])=C([H])C=12)C1C([H])=C(C(=C(C2N=C(C([H])=C3C([H])=C([H])C([H])=C([H])C=23)N([H])[H])C=1N([H])[H])C([H])([H])[H])C([H])([H])[H])N([H])[H]	2.68421	5.608017	1.5511039999999996	5.652895470000001	0.7322156799999995	2.7726943000000004
[H]C1=NC([H])=C([H])C(C2C([H])=C(C(=O)N(C=2[H])C([H])([H])[H])C2=NC([H])=C([H])C([H])=C2C([H])([H])[H])=C1C([H])([H])[H]	3.05356	6.236281	1.4672919999999996	6.22461571	0.6551086399999999	3.0792548
[H]C1=NC([H])=C([H])C(C2C(=O)N(C([H])=C(C3=NC([H])=C([H])C([H])=C3C([H])([H])[H])C=2[H])C([H])([H])[H])=C1C([H])([H])[H]	3.06601	6.243925	1.397096	6.23157175	0.5905283199999998	3.0895883
[H]C1=C([H])C(C2=NC(C3C([H])=C(F)C(=C([H])C=3[H])N([H])[H])=C(S2)C([H])([H])[H])=C(C(F)=C1[H])N([H])[H]	3.03364	5.701656	1.5001360000000004	5.73810696	0.6853251199999999	3.0627212000000004
[H]C1=C([H])C(C2N=C(SC=2C([H])([H])[H])C2C([H])=C(F)C(=C([H])C=2[H])N([H])[H])=C(C(F)=C1[H])N([H])[H]	2.82697	5.667076	1.501884	5.70663916	0.6869332799999999	2.8911851000000004
[H]C1C([H])=C([H])C(=C(F)C=1[H])C1C([H])=C(C2C([H])=C([H])C([H])=C(F)C=2[H])C(=C([H])C=1OC([H])([H])[H])C([H])([H])[H]	3.4801800000000003	6.046546	1.0611119999999996	6.051956860000001	0.28142303999999907	3.4333494
[H]C1C([H])=C([H])C(=C(F)C=1[H])C1=C([H])C(=C(OC([H])([H])[H])C([H])=C1C([H])([H])[H])C1C([H])=C([H])C([H])=C(F)C=1[H]	3.4918	6.049003000000001	1.0495200000000002	6.0541927300000005	0.27075840000000007	3.442994
[H]C1=C([H])C(C2C(=NC(=C(C=2[H])C2=C([H])C([H])=C(C(C(=O)C([H])([H])[H])=C2[H])N([H])[H])N([H])[H])C([H])([H])[H])=C(C(C(=O)C([H])([H])[H])=C1[H])N([H])[H]	2.5522400000000003	5.811948	1.6810999999999998	5.838472680000001	0.8518119999999998	2.6631592000000004
[H]C1=C([H])C(C2C([H])=C(C(=NC=2N([H])[H])C([H])([H])[H])C2=C([H])C([H])=C(C(C(=O)C([H])([H])[H])=C2[H])N([H])[H])=C(C(C(=O)C([H])([H])[H])=C1[H])N([H])[H]	2.70994	5.788834	1.6465999999999998	5.81743894	0.8200719999999997	2.7940502
[H]C1=C([H])C(=C(C(F)=C1[H])C1C(Cl)=C(C([H])=C(OC([H])([H])[H])C=1N([H])[H])C1C([H])=C([H])C(=C([H])C=1F)N([H])[H])N([H])[H]	3.38805	5.889207	1.2483319999999996	5.90877837	0.4536654399999991	3.3568815
[H]C1=C([H])C(=C(C(F)=C1[H])C1C([H])=C(OC([H])([H])[H])C(=C(C=1Cl)C1C([H])=C([H])C(=C([H])C=1F)N([H])[H])N([H])[H])N([H])[H]	3.32995	5.754618000000002	1.2158559999999996	5.786302380000001	0.4237875199999994	3.3086585
[H]C1N=C(Cl)C(C2C([H])=C([H])C(=C([H])C=2OC([H])(F)F)C2=C([H])N=C(Cl)C([H])=C2C([H])([H])[H])=C(C=1[H])C([H])([H])[H]	3.6586300000000005	6.761806	1.450456	6.70284346	0.6396195200000001	3.5814629000000004
[H]C1N=C(Cl)C(C2C([H])=C([H])C(=C(OC([H])(F)F)C=2[H])C2=C([H])N=C(Cl)C([H])=C2C([H])([H])[H])=C(C=1[H])C([H])([H])[H]	3.6495	6.8318759999999985	1.5314159999999999	6.766607159999999	0.7141027199999996	3.573885
[H]C1N=C(C(C2C([H])=C([H])C([H])=C([H])C=2C(F)(F)F)=C(C=1C1C([H])=C([H])C([H])=C(C=1[H])C(F)(F)F)C([H])([H])[H])N([H])[H]	3.47022	6.1902349999999995	1.47548	6.18271385	0.6626415999999997	3.4250825999999996
[H]C1N=C(C(C2C([H])=C([H])C([H])=C(C=2[H])C(F)(F)F)=C(C=1C1C([H])=C([H])C([H])=C([H])C=1C(F)(F)F)C([H])([H])[H])N([H])[H]	3.39718	6.219446	1.738048	6.209295859999999	0.9042041599999999	3.3644594000000003
[H]C1=C([H])C(=C(C2=NC(=C(C3C([H])=C([H])C(=C([H])C=3F)N([H])[H])N2[H])[N+](=O)[O-])C(F)=C1[H])N([H])[H]	2.48252	6.200791000000001	2.229788	6.192319810000001	1.3566049600000003	2.6052916
[H]C1=C([H])C(=C(C(F)=C1[H])C1=C(N=C(C2C([H])=C([H])C(=C([H])C=2F)N([H])[H])N1[H])[N+](=O)[O-])N([H])[H]	2.66263	6.158294000000001	2.2563760000000004	6.153647540000001	1.3810659200000002	2.7547829000000004
[H]C1=C([H])C(C2C([H])=C([H])C(C3=C([H])C([H])=C(C(C(=O)C([H])([H])[H])=C3[H])N([H])[H])=C(C=2[H])C(F)(F)F)=C(C(C(=O)C([H])([H])[H])=C1[H])N([H])[H]	2.56635	6.077394999999999	1.7465119999999998	6.08002945	0.9119910400000002	2.6748705
[H]C1=C([H])C(C2C([H])=C([H])C(=C([H])C=2C(F)(F)F)C2=C([H])C([H])=C(C(C(=O)C([H])([H])[H])=C2[H])N([H])[H])=C(C(C(=O)C([H])([H])[H])=C1[H])N([H])[H]	2.62279	6.0310760000000005	1.7270079999999997	6.037879160000001	0.8940473599999992	2.7217157000000003
[H]C(=O)C1=C([H])C(=NC([H])=C1C1=C([H])C([H])=NC(OC([H])([H])[H])=C1N([H])[H])C1=NC(OC([H])([H])[H])=C(C([H])=C1[H])N([H])[H]	2.3995199999999994	5.992947	2.487204	6.00318177	1.59342768	2.5364015999999996
[H]C(=O)C1=C([H])C(=NC([H])=C1C1=NC(OC([H])([H])[H])=C(C([H])=C1[H])N([H])[H])C1=C([H])C([H])=NC(OC([H])([H])[H])=C1N([H])[H]	2.53979	6.06511	2.543508	6.0688501	1.6452273599999998	2.6528257
[H]C1=NC([H])=C(C(OC([H])([H])[H])=C1C1=NC([H])=C([H])C([H])=C1C(F)(F)F)C1=C([H])N=C([H])C(=C1[H])C(F)(F)F	3.68602	6.911228	1.846608	6.83881748	1.0040793599999995	3.6041966000000003
[H]C1=NC([H])=C(C2=NC([H])=C([H])C([H])=C2C(F)(F)F)C(OC([H])([H])[H])=C1C1=C([H])N=C([H])C(=C1[H])C(F)(F)F	3.64784	6.919236	1.829956	6.846104759999999	0.9887595200000003	3.5725072
[H]C1N=C(C([H])=C2C([H])=C(C([H])=C([H])C=12)C1=C([H])C([H])=C([H])C2=NC(=NN21)C1N=C(C([H])=C2C([H])=C([H])C([H])=C([H])C=12)N([H])[H])N([H])[H]	2.65267	5.840067	1.882304	5.864060970000001	1.0369196799999996	2.7465161
[H]C1N=C(C([H])=C2C([H])=C(C3=NN4C(=N3)C([H])=C([H])C([H])=C4C3N=C(C([H])=C4C([H])=C([H])C([H])=C([H])C=34)N([H])[H])C([H])=C([H])C=12)N([H])[H]	2.62611	5.763718	1.9161599999999999	5.79458338	1.0680671999999998	2.7244713000000003
[H]C1N=C(F)C(C2=C([H])C(Cl)=C(C([H])=C2F)C2=C([H])N=C(F)C([H])=C2C([H])([H])[H])=C(C=1[H])C([H])([H])[H]	3.76819	6.979386999999999	1.489096	6.900842169999999	0.67516832	3.6723977000000003
[H]C1N=C(F)C(C2C([H])=C(F)C(=C([H])C=2Cl)C2=C([H])N=C(F)C([H])=C2C([H])([H])[H])=C(C=1[H])C([H])([H])[H]	3.80388	6.9721980000000014	1.4578159999999998	6.894300180000002	0.6463907199999994	3.7020204000000003
[H]C1=NN([H])C2=C([H])C([H])=C(C([H])=C12)C1=C([H])C(C2C([H])=C([H])C([H])=C3C([H])=NN([H])C=23)=C(C(=C1[H])[N+]([O-])=NC([H])([H])[H])N([H])[H]	2.64603	5.884111	1.93916	5.90414101	1.0892271999999998	2.7410049
[H]C1=NN([H])C2=C([H])C([H])=C(C([H])=C12)C1C([H])=C(C([H])=C(C=1N([H])[H])[N+]([O-])=NC([H])([H])[H])C1C([H])=C([H])C([H])=C2C([H])=NN([H])C=12	2.75725	5.881563	1.680548	5.90182233	0.8513041599999998	2.8333175
[H]C1=C(C(=C([H])C(C2=C(C(=NN2[H])C2=C(C(=C([H])C([H])=C2[N+](=O)[O-])C([H])([H])[H])N([H])[H])[N+](=O)[O-])=C1[N+](=O)[O-])C([H])([H])[H])N([H])[H]	2.33727	6.8421590000000005	3.093852	6.77596469	2.15154384	2.4847341000000003
[H]C1=C(C(=C([H])C(C2=NN([H])C(C3=C(C(=C([H])C([H])=C3[N+](=O)[O-])C([H])([H])[H])N([H])[H])=C2[N+](=O)[O-])=C1[N+](=O)[O-])C([H])([H])[H])N([H])[H]	2.1339200000000003	6.7534339999999995	3.239672	6.695224939999999	2.2856982400000003	2.3159536000000003
[H]C1C([H])=C([H])C2=C(C=1[H])C1=C([H])C(=C([H])C(=C1N2[H])[N+](=O)[O-])C1C([H])=C(C(=C([H])C=1[N+](=O)[O-])C1C([H])=C([H])C2=C(C=1[H])C1=C([H])C([H])=C([H])C(=C1N2[H])[N+](=O)[O-])N([H])[H]	2.3464	6.218262999999999	2.536148	6.2082193299999995	1.6384561599999996	2.492312
[H]C1C([H])=C([H])C2=C(C=1[H])C1=C([H])C(=C([H])C(=C1N2[H])[N+](=O)[O-])C1=C([H])C(=C(C([H])=C1N([H])[H])C1C([H])=C([H])C2=C(C=1[H])C1=C([H])C([H])=C([H])C(=C1N2[H])[N+](=O)[O-])[N+](=O)[O-]	2.45762	6.16521	2.536148	6.1599411	1.6384561599999996	2.5846246
[H]C1N=C(Cl)C(C2C([H])=C([H])C([H])=C(F)C=2[H])=C(C=1C1C([H])=C([H])C([H])=C([H])C=1F)N([H])[H]	3.5631800000000005	6.483073	1.3476919999999994	6.449196430000001	0.5450766399999996	3.5022394000000006
[H]C1N=C(Cl)C(C2C([H])=C([H])C([H])=C([H])C=2F)=C(C=1C1C([H])=C([H])C([H])=C(F)C=1[H])N([H])[H]	3.46524	6.485621	1.33012	6.451515110000001	0.5289104	3.4209492
[H]C1=NC2=NN([H])C(C3C([H])=C(C([H])=C4SC(Cl)=NC=34)C3C([H])=NC4=NN([H])C([H])=C4C=3[H])=C2C([H])=C1[H]	2.94981	6.21799	2.227488	6.2079709	1.3544889600000003	2.9931422999999997
[H]C1=NC2=NN([H])C(C3C([H])=C4SC(Cl)=NC4=C(C=3[H])C3C([H])=NC4=NN([H])C([H])=C4C=3[H])=C2C([H])=C1[H]	2.7622299999999997	6.239739	2.280756	6.22776249	1.4034955199999999	2.8374509
[H]C1=NC(=C(C([H])=C1[H])C1N=C(C2C([H])=NC(=C([H])C=2[H])C([H])([H])C([H])([H])[H])N(C=1[H])C([H])([H])[H])C([H])([H])C([H])([H])[H]	3.3980099999999998	6.028437	1.0665399999999998	6.035477670000001	0.2864167999999996	3.3651483
[H]C1=NC(=C(C2=NC(C3C([H])=NC(=C([H])C=3[H])C([H])([H])C([H])([H])[H])=C([H])N2C([H])([H])[H])C([H])=C1[H])C([H])([H])C([H])([H])[H]	3.3340999999999994	6.007962	1.1253279999999997	6.01684542	0.34050175999999954	3.3121029999999996
[H]C1=NC2=NN([H])C(=C2C([H])=C1[H])C1C([H])=C(C([H])=C(C=1C([H])([H])[H])C([H])([H])[H])C1C([H])=NC2=NN([H])C([H])=C2C=1[H]	2.93155	6.076576	1.7257200000000001	6.07928416	0.8928623999999994	2.9779865
[H]C1=NC2=NN([H])C(C3=C([H])C(C4C([H])=NC5=NN([H])C([H])=C5C=4[H])=C(C(=C3[H])C([H])([H])[H])C([H])([H])[H])=C2C([H])=C1[H]	2.9863299999999997	6.1188	1.6429200000000002	6.117708	0.8166864	3.0234539
[H]C1=NC(=C(C2C(Cl)=C(C3=NC(=C([H])N3[H])[N+](=O)[O-])C([H])=C(Cl)C=2N([H])[H])N1[H])[N+](=O)[O-]	2.5895900000000003	6.425106	2.491528	6.39644646	1.59740576	2.6941597
[H]C1=NC(=C(C2C([H])=C(Cl)C(=C(C3=NC(=C([H])N3[H])[N+](=O)[O-])C=2Cl)N([H])[H])N1[H])[N+](=O)[O-]	2.6667799999999997	6.5710700000000015	2.544336	6.529273700000001	1.6459891199999999	2.7582274
[H]C1=NC(=NC([H])=C1C1C([H])=C(C([H])=C([H])C=1Cl)C([H])([H])[H])C1=C([H])C(Cl)=C([H])C([H])=C1C([H])([H])[H]	3.08925	6.609653999999999	2.1088080000000002	6.564385139999999	1.2453033600000003	3.1088775
[H]C1=NC(=NC([H])=C1C1=C([H])C(Cl)=C([H])C([H])=C1C([H])([H])[H])C1C([H])=C(C([H])=C([H])C=1Cl)C([H])([H])[H]	3.06435	6.609653999999999	2.2080759999999997	6.564385139999999	1.33662992	3.0882105
[H]C1N=C(OC([H])([H])[H])C(=C(OC([H])([H])[H])C=1[H])C1C([H])=C([H])C2C([H])=C([H])C(=NC=2C=1[H])C1=C([H])N=C(OC([H])([H])[H])C([H])=C1OC([H])([H])[H]	3.12826	6.4413040000000015	1.9060400000000002	6.411186640000001	1.0587568000000003	3.1412558
[H]C1N=C(OC([H])([H])[H])C(C2=NC3C([H])=C(C([H])=C([H])C=3C([H])=C2[H])C2=C([H])N=C(OC([H])([H])[H])C([H])=C2OC([H])([H])[H])=C(OC([H])([H])[H])C=1[H]	3.09091	6.43184	1.9655639999999999	6.402574400000001	1.11351888	3.1102553000000004
[H]C1C([H])=C([H])C(=C(OC([H])(F)F)C=1[H])C1=C([H])C(C2C([H])=C([H])C([H])=C(OC([H])(F)F)C=2[H])=C2C(=C1[H])C([H])([H])C(=O)N2[H]	3.3274599999999994	6.138729	1.352016	6.13584339	0.54905472	3.3065917999999996
[H]C1C([H])=C([H])C(=C(OC([H])(F)F)C=1[H])C1C([H])=C(C([H])=C2C=1N([H])C(=O)C2([H])[H])C1C([H])=C([H])C([H])=C(OC([H])(F)F)C=1[H]	3.3208199999999994	6.165665	1.4064799999999995	6.16035515	0.5991615999999995	3.3010805999999997
[H]C1=NC(=C([H])N=C1C1C([H])=C([H])C([H])=C(C=1Cl)C([H])([H])[H])C1C([H])=C([H])C([H])=C(Cl)C=1C([H])([H])[H]	3.0519	6.669441000000001	2.2782720000000003	6.618791310000001	1.4012102400000002	3.077877
[H]C1=NC(=C([H])N=C1C1C([H])=C([H])C([H])=C(Cl)C=1C([H])([H])[H])C1C([H])=C([H])C([H])=C(C=1Cl)C([H])([H])[H]	3.08842	6.665800999999999	2.239816	6.615478909999999	1.36583072	3.1081886
[H]C1N=C(C2SC(=NC=2C=1[H])C1C([H])=C([H])C([H])=C(C=1N([H])[H])C([H])([H])N(C([H])([H])[H])C1([H])C([H])([H])C([H])([H])C([H])([H])C([H])([H])C1([H])[H])C1=C([H])C([H])=C(C(=C1[H])C([H])([H])N(C([H])([H])[H])C1([H])C([H])([H])C([H])([H])C([H])([H])C([H])([H])C1([H])[H])N([H])[H]	2.87594	6.006779	1.952224	6.01576889	1.1012460800000001	2.9318302000000003
[H]C1N=C(C2SC(=NC=2C=1[H])C1=C([H])C([H])=C(C(=C1[H])C([H])([H])N(C([H])([H])[H])C1([H])C([H])([H])C([H])([H])C([H])([H])C([H])([H])C1([H])[H])N([H])[H])C1C([H])=C([H])C([H])=C(C=1N([H])[H])C([H])([H])N(C([H])([H])[H])C1([H])C([H])([H])C([H])([H])C([H])([H])C([H])([H])C1([H])[H]	2.68006	5.869096	1.899232	5.89047736	1.0524934400000001	2.7692498000000003
[H]C1=C(F)C(Cl)=C([H])C(=C1C1=NN=C(C(=C1[H])C1=C(Cl)C(F)=C([H])C([H])=C1N([H])[H])N([H])[H])N([H])[H]	2.7198999999999995	6.307898000000001	1.965288	6.289787180000001	1.1132649600000004	2.8023169999999995
[H]C1=C(F)C(Cl)=C([H])C(=C1C1C(=NN=C(C=1[H])C1=C(Cl)C(F)=C([H])C([H])=C1N([H])[H])N([H])[H])N([H])[H]	2.75891	6.322458	1.92214	6.30303678	1.0735687999999994	2.8346953000000004
[H]C1N=C(C2C([H])=C([H])C([H])=C(C=2N([H])[H])[N+]([O-])=NC(C([H])([H])[H])(C([H])([H])[H])C([H])([H])[H])N([H])C=1C1=C([H])C([H])=C(C(=C1[H])[N+]([O-])=NC(C([H])([H])[H])(C([H])([H])[H])C([H])([H])[H])N([H])[H]	2.6136599999999994	5.803757999999998	2.080564	5.831019779999998	1.2193188799999994	2.7141377999999996
[H]C1N=C(C2=C([H])C([H])=C(C(=C2[H])[N+]([O-])=NC(C([H])([H])[H])(C([H])([H])[H])C([H])([H])[H])N([H])[H])N([H])C=1C1C([H])=C([H])C([H])=C(C=1N([H])[H])[N+]([O-])=NC(C([H])([H])[H])(C([H])([H])[H])C([H])([H])[H]	2.54145	5.749613	2.093076	5.7817478300000005	1.2308299199999997	2.6542035000000004
[H]C1=NN(C(=N1)C1C([H])=NC([H])=C(C2=NN(C([H])=N2)C2([H])OC([H])([H])C([H])([H])C([H])([H])C2([H])[H])C=1OC([H])([H])[H])C1([H])OC([H])([H])C([H])([H])C([H])([H])C1([H])[H]	3.53745	6.7817349999999985	1.5284719999999998	6.720978849999998	0.7113942399999997	3.4808835000000005
[H]C1=NN(C(=N1)C1=C([H])N=C([H])C(C2=NN(C([H])=N2)C2([H])OC([H])([H])C([H])([H])C([H])([H])C2([H])[H])=C1OC([H])([H])[H])C1([H])OC([H])([H])C([H])([H])C([H])([H])C1([H])[H]	3.55986	6.860722999999999	1.6531319999999998	6.792857929999999	0.8260814399999994	3.4994838
[H]C1=NC([H])=C(C2N=C(C3=NC([H])=C([H])C(=C3[H])C(F)(F)F)N(C=2[H])C([H])([H])[H])C(=C1[H])C(F)(F)F	3.03779	6.21981	1.7051119999999995	6.2096271	0.8739030400000001	3.0661657000000004
[H]C1=NC([H])=C(C2=NC(C3=NC([H])=C([H])C(=C3[H])C(F)(F)F)=C([H])N2C([H])([H])[H])C(=C1[H])C(F)(F)F	2.76887	6.120529	1.803644	6.11928139	0.96455248	2.8429621000000003
[H]C1=NN([H])C(C2N=C(C3=NN([H])C([H])=C3[N+](=O)[O-])C3=C([H])C([H])=C([H])C([H])=C3C=2[H])=C1[N+](=O)[O-]	2.89586	6.8024830000000005	2.746828	6.73985953	1.8322817599999999	2.9483638
[H]C1=NN([H])C(C2=NC(C3=NN([H])C([H])=C3[N+](=O)[O-])=C([H])C3=C([H])C([H])=C([H])C([H])=C23)=C1[N+](=O)[O-]	2.82448	6.857993	2.77544	6.7903736299999995	1.8586048000000002	2.8891184
[H]C1=C([H])C(Cl)=C(C([H])=C1Cl)C1C(F)=C(C([H])=C(C=1N([H])[H])C([H])([H])[H])C1=C([H])C(Cl)=C([H])C([H])=C1Cl	3.3955199999999994	6.1418230000000005	1.291112	6.13865893	0.49302303999999975	3.3630815999999997
[H]C1=C([H])C(Cl)=C(C([H])=C1Cl)C1C([H])=C(C(=C(C=1F)C1=C([H])C(Cl)=C([H])C([H])=C1Cl)N([H])[H])C([H])([H])[H]	3.4776900000000004	6.146828	1.2210079999999994	6.14321348	0.42852735999999947	3.4312827000000006
[H]C(=O)C1=C([H])C(=C([H])C([H])=C1OC([H])(C([H])([H])[H])C([H])([H])[H])C1C([H])=C(C([H])=C2OC([H])([H])C([H])([H])C(=O)C=12)C1C([H])=C([H])C([H])=C(C([H])=O)C=1OC([H])(C([H])([H])[H])C([H])([H])[H]	2.97886	6.592819	2.262264	6.549065290000001	1.38648288	3.0172538
[H]C(=O)C1=C([H])C(=C([H])C([H])=C1OC([H])(C([H])([H])[H])C([H])([H])[H])C1C([H])=C2OC([H])([H])C([H])([H])C(=O)C2=C(C=1[H])C1C([H])=C([H])C([H])=C(C([H])=O)C=1OC([H])(C([H])([H])[H])C([H])([H])[H]	2.99795	6.693010000000001	2.27128	6.6402391000000005	1.3947775999999998	3.0330985000000004
[H]C1C([H])=C([H])C(=C(C(=O)C([H])([H])[H])C=1[H])C1C(Cl)=C(C([H])=C(Cl)C=1N([H])[H])C1C([H])=C([H])C(C(=O)C([H])([H])[H])=C([H])C=1[H]	3.04526	6.323459	2.006596	6.303947689999999	1.1512683199999998	3.0723658
[H]C1C([H])=C([H])C(C2C([H])=C(Cl)C(=C(C=2Cl)C2C([H])=C([H])C(C(=O)C([H])([H])[H])=C([H])C=2[H])N([H])[H])=C(C(=O)C([H])([H])[H])C=1[H]	2.97056	6.397169	1.982492	6.37102379	1.1290926399999996	3.0103648
[H]C1=NC(=C(OC([H])([H])[H])C([H])=C1[N+](=O)[O-])C1C([H])=C(C2=NC([H])=C(OC([H])([H])[H])C([H])=C2[N+](=O)[O-])C([H])=C([H])C=1C(=O)N([H])[H]	2.63275	6.8948480000000005	2.9445360000000003	6.82391168	2.01417312	2.7299825
[H]C1=NC(=C(OC([H])([H])[H])C([H])=C1[N+](=O)[O-])C1C([H])=C([H])C(C(=O)N([H])[H])=C(C2=NC([H])=C(OC([H])([H])[H])C([H])=C2[N+](=O)[O-])C=1[H]	2.5970599999999995	6.883382000000001	2.862564	6.8134776200000005	1.93875888	2.7003597999999998
[H]C1=C([H])C(=C(C2C([H])=C([H])C(=C([H])C=2N([H])C(=S)C([H])([H])[H])C2C([H])=C([H])C(=C([H])C=2C([H])([H])[H])C([H])([H])[H])C(=C1[H])C([H])([H])[H])C([H])([H])[H]	2.30324	5.963918	1.6641719999999998	5.97676538	0.8362382399999992	2.4564892
[H]C1=C([H])C(=C(C2C([H])=C([H])C(C3C([H])=C([H])C(=C([H])C=3C([H])([H])[H])C([H])([H])[H])=C(C=2[H])N([H])C(=S)C([H])([H])[H])C(=C1[H])C([H])([H])[H])C([H])([H])[H]	2.34391	5.999681	1.673832	6.00930971	0.8451254399999995	2.4902453
[H]C1=NC([H])=C(C2=NN(C(=N2)C2=NC([H])=C([H])C([H])=C2[H])C2([H])OC([H])([H])C([H])([H])C([H])([H])C2([H])[H])C([H])=C1[H]	3.34157	6.736872	1.7661080000000002	6.68015352	0.9300193600000002	3.3183031
[H]C1=NC([H])=C(C2=NC(=NN2C2([H])OC([H])([H])C([H])([H])C([H])([H])C2([H])[H])C2=NC([H])=C([H])C([H])=C2[H])C([H])=C1[H]	3.2660400000000003	6.745881	1.916712	6.688351709999999	1.0685750399999998	3.2556132000000004
[H]C(=O)C1C([H])=C(SC=1C1=NC(F)=C([H])N1C([H])([H])[H])C1=C(F)N=C([H])N1C([H])([H])[H]	2.31486	5.8412500000000005	2.313784	5.8651375	1.43388128	2.4661338
[H]C(=O)C1C([H])=C(SC=1C1=C(F)N=C([H])N1C([H])([H])[H])C1=NC(F)=C([H])N1C([H])([H])[H]	2.1413900000000003	5.780371	2.455004	5.80973761	1.5638036800000004	2.3221537000000003
[H]C1=NC(C2=NC([H])=C(C3=NC([H])=C(C([H])=C3[H])N([H])[H])N3C2=NC([H])=C3[H])=C(C([H])=C1[H])N([H])[H]	2.51821	5.9168709999999995	1.984332	5.9339526099999995	1.1307854400000004	2.6349143
[H]C1=NC(=C(C([H])=C1[H])N([H])[H])C1=C([H])N=C(C2=NC([H])=C(C([H])=C2[H])N([H])[H])C2=NC([H])=C([H])N21	2.3605099999999997	5.710756	1.9893919999999998	5.74638796	1.1354406399999997	2.5040233
[H]C1=NC(=C(C([H])=C1[H])C1=C(N=C(C(C2=NC(=C([H])C([H])=C2[H])N([H])[H])=C1C([H])([H])[H])C([H])([H])[H])C([H])([H])[H])N([H])[H]	3.4743699999999995	6.230912	1.2155799999999999	6.21972992	0.42353359999999984	3.4285270999999997
[H]C1=NC(=C(C([H])=C1[H])C1C(=NC(=C(C2=NC(=C([H])C([H])=C2[H])N([H])[H])C=1C([H])([H])[H])C([H])([H])[H])C([H])([H])[H])N([H])[H]	3.3839	6.1891430000000005	1.205552	6.18172013	0.4143078400000002	3.3534370000000004
[H]C(=O)C1=C([H])N=C(C([H])=C1[H])C1C([H])=C(Cl)C(=C(C=1Cl)C1=C([H])C([H])=NC([H])=C1C([H])=O)N([H])[H]	2.78298	6.455682	2.537528	6.424270620000001	1.6397257600000001	2.8546734000000002
[H]C(=O)C1=C([H])N=C(C([H])=C1[H])C1C(Cl)=C(C([H])=C(Cl)C=1N([H])[H])C1=C([H])C([H])=NC([H])=C1C([H])=O	2.69998	6.515287	2.601468	6.47851117	1.6985505600000002	2.7857834
[H]C1=NN(C(=N1)C1C2C(=NC([H])=C(C3=NN(C([H])=N3)C([H])([H])[H])C=2[H])N([H])C=1[H])C([H])([H])[H]	3.1166400000000003	5.979388	1.2105199999999998	5.99084308	0.41887839999999965	3.1316112000000005
[H]C1=NN(C(=N1)C1=C([H])N=C2C(=C1[H])C(C1=NN(C([H])=N1)C([H])([H])[H])=C([H])N2[H])C([H])([H])[H]	3.19715	6.039721	1.2215600000000002	6.04574611	0.4290352000000004	3.1984345000000003
[H]C1SC(=NC=1C1C([H])=C(F)C(Cl)=C([H])C=1[H])C1C([H])=C([H])C([H])=C(F)C=1Cl	3.22952	6.481435	2.033644	6.44770585	1.1761524799999998	3.2253016
[H]C1SC(=NC=1C1C([H])=C([H])C([H])=C(F)C=1Cl)C1C([H])=C(F)C(Cl)=C([H])C=1[H]	3.17972	6.427563	2.03576	6.39868233	1.1780992000000001	3.1839676000000003
[H]C1N=C2C(=C([H])C(=NN2C=1[H])C1C(=NC(=C([H])C=1[H])N([H])[H])C([H])([H])[H])C1C([H])=C([H])C(=NC=1N([H])[H])C([H])([H])[H]	2.89669	6.165119	1.931064	6.15985829	1.0817788799999999	2.9490527
[H]C1N=C2C(=C([H])C(=NN2C=1[H])C1C([H])=C([H])C(=NC=1N([H])[H])C([H])([H])[H])C1C(=NC(=C([H])C=1[H])N([H])[H])C([H])([H])[H]	2.71575	6.197788	2.00264	6.18958708	1.1476287999999997	2.7988725
[H]C1=NC(=C(C([H])=C1[H])C1C([H])=C(C([H])=C(C=1C([H])([H])[H])C([H])([H])[H])C1C([H])=NC(=C([H])C=1[H])N([H])[H])N([H])[H]	3.37394	5.9508139999999985	0.829364	5.964840739999999	0.0682148800000002	3.3451702
[H]C1=NC(=C(C([H])=C1[H])C1=C([H])C(C2C([H])=NC(=C([H])C=2[H])N([H])[H])=C(C(=C1[H])C([H])([H])[H])C([H])([H])[H])N([H])[H]	3.4976099999999994	5.9152330000000015	0.7954159999999995	5.932462030000002	0.03698271999999925	3.4478162999999995
[H]C1N=C(C2=C([H])C([H])=C3C(C(=O)C(=O)N3C([H])([H])C([H])([H])[H])=C2[H])N(C=1C1C([H])=C([H])C([H])=C2C(=O)C(=O)N(C=12)C([H])([H])C([H])([H])[H])C([H])([H])[H]	1.7654	6.203885	2.863852	6.195135349999999	1.9399438399999998	2.010082
[H]C1N=C(C2C([H])=C([H])C([H])=C3C(=O)C(=O)N(C=23)C([H])([H])C([H])([H])[H])N(C=1C1=C([H])C([H])=C2C(C(=O)C(=O)N2C([H])([H])C([H])([H])[H])=C1[H])C([H])([H])[H]	1.6516900000000003	6.2886060000000015	2.87986	6.272231460000001	1.9546712	1.9157027000000006
[H]C1N=C2C(=NC(C3=C([H])C([H])=C(C(=C3[H])[N+]([O-])=NC([H])([H])[H])N([H])[H])=C([H])N2C=1Cl)C1C([H])=C([H])C([H])=C(C=1N([H])[H])[N+]([O-])=NC([H])([H])[H]	2.63856	6.273226999999999	2.2017279999999997	6.258236569999999	1.33078976	2.7348048
[H]C1N=C2C(=NC(C3C([H])=C([H])C([H])=C(C=3N([H])[H])[N+]([O-])=NC([H])([H])[H])=C([H])N2C=1Cl)C1=C([H])C([H])=C(C(=C1[H])[N+]([O-])=NC([H])([H])[H])N([H])[H]	2.4028400000000003	6.129538	2.3101960000000004	6.12747958	1.4305803200000002	2.5391572000000004
[H]C1=NC2C(=C([H])C([H])=C([H])C=2C([H])=C1[H])C1=C([H])C(=C(C2=NC3C([H])=C([H])C([H])=C([H])C=3C([H])=C2[H])C(=C1[H])C([H])([H])C([H])([H])[H])C([H])([H])C([H])([H])[H]	3.10419	6.465237	1.893252	6.43296567	1.0469918399999996	3.1212777000000003
[H]C1=NC2C(=C([H])C([H])=C([H])C=2C([H])=C1[H])C1C(=C([H])C(C2=NC3C([H])=C([H])C([H])=C([H])C=3C([H])=C2[H])=C([H])C=1C([H])([H])C([H])([H])[H])C([H])([H])C([H])([H])[H]	3.2461199999999995	6.309809	1.8397080000000001	6.29152619	0.9977313599999995	3.2390795999999997
[H]C1=C([H])C(F)=C(C(F)=C1[H])C1C([H])=C(C([H])=C2C=1N([H])C([H])([H])C([H])([H])C2([H])[H])C1C([H])=C([H])C(F)=C([H])C=1F	3.0519	5.717217	0.9294599999999996	5.75226747	0.16030319999999953	3.077877
[H]C1=C([H])C(F)=C(C(F)=C1[H])C1=C([H])C(C2C([H])=C([H])C(F)=C([H])C=2F)=C2C(=C1[H])C([H])([H])C([H])([H])C([H])([H])N2[H]	3.11249	5.69201	0.9270680000000002	5.729329099999999	0.15810255999999967	3.1281667000000004
[H]C1=C(Cl)C([H])=C(C(=C1Cl)C1=C(C(=NN1C([H])([H])[H])C1C(Cl)=C([H])C(=C([H])C=1Cl)N([H])[H])[N+](=O)[O-])N([H])[H]	2.92906	6.668621999999999	2.667248	6.6180460199999995	1.75906816	2.9759198000000007
[H]C1=C(Cl)C([H])=C(C(C2=NN(C(C3C(Cl)=C([H])C(=C([H])C=3Cl)N([H])[H])=C2[N+](=O)[O-])C([H])([H])[H])=C1Cl)N([H])[H]	2.88009	6.795567	2.6644880000000004	6.733565970000001	1.7565289600000003	2.9352747
[H]C1=NC(=C([H])C2=NN([H])C(=C12)C1C([H])=C([H])C([H])=C(C=1[N+](=O)[O-])C([H])([H])[H])C1=C([H])C([H])=C(C(=C1[H])C([H])([H])[H])[N+](=O)[O-]	2.7223900000000003	6.5993710000000005	2.5091	6.555027610000001	1.613572	2.8043837000000007
[H]C1=NC(=C([H])C2=NN([H])C(C3=C([H])C([H])=C(C(=C3[H])C([H])([H])[H])[N+](=O)[O-])=C12)C1C([H])=C([H])C([H])=C(C=1[N+](=O)[O-])C([H])([H])[H]	2.60204	6.612748	2.64296	6.56720068	1.7367232000000001	2.7044932000000004
[H]C(=O)C1=NC(=C([H])N=C1[H])C1C([H])=C(C2=NC([H])=C([H])N=C2C([H])=O)C([H])=C2N=C([H])C([H])=C([H])C=12	2.24846	6.703202	2.801752	6.64951382	1.88281184	2.4110218000000003
[H]C(=O)C1=NC(=C([H])N=C1[H])C1C([H])=C2N=C([H])C([H])=C([H])C2=C(C2=NC([H])=C([H])N=C2C([H])=O)C=1[H]	2.39703	6.748975	2.787676	6.6911672499999995	1.86986192	2.5343349
[H]C1=NC2C([H])=C(C([H])=C([H])C=2S1)C1N=C(C2=NC3C([H])=C([H])C([H])=C([H])C=3S2)N([H])C=1C(F)(F)F	3.04111	6.343661	1.8391560000000002	6.32233151	0.9972235199999995	3.0689213000000004
[H]C1=NC2C([H])=C(C3=NC(C4=NC5C([H])=C([H])C([H])=C([H])C=5S4)=C(N3[H])C(F)(F)F)C([H])=C([H])C=2S1	2.97056	6.297888	1.988748	6.28067808	1.1348481599999998	3.0103648
[H]C1=NC([H])=C([H])C(C2C([H])=C3OC([H])([H])C([H])([H])C([H])(C3=C(C3=NC([H])=C([H])C([H])=C3C([H])([H])[H])C=2[H])N([H])[H])=C1C([H])([H])[H]	3.3988400000000003	6.309627	1.1824599999999998	6.29136057	0.3930631999999994	3.3658372000000005
[H]C1=NC([H])=C([H])C(C2C([H])=C(C3=NC([H])=C([H])C([H])=C3C([H])([H])[H])C([H])=C3OC([H])([H])C([H])([H])C([H])(C=23)N([H])[H])=C1C([H])([H])[H]	3.4710499999999995	6.349849	1.2426279999999998	6.32796259	0.4484177599999999	3.4257714999999997
[H]C1C([H])=C([H])C2=C(C3=NSN=C3C(C3C([H])=C([H])C(=C([H])C=3F)[N+](=O)[O-])=C2C=1[H])C1C(F)=C([H])C([H])=C([H])C=1[N+](=O)[O-]	2.02685	6.348393	3.5152120000000004	6.32663763	2.5391950400000005	2.2270855000000003
[H]C1C([H])=C([H])C2=C(C3=NSN=C3C(C3C([H])=C([H])C(=C([H])C=3F)[N+](=O)[O-])=C2C=1[H])C1C(F)=C([H])C([H])=C([H])C=1[N+](=O)[O-]	2.11649	6.328191	3.5085879999999996	6.30825381	2.5331009599999996	2.3014867000000003
[H]C1=NC(=C(C([H])=C1[H])C1N=C([H])C2C(=NN([H])C=2C2=NC(=C([H])C([H])=C2[H])C([H])([H])[H])C=1[H])C([H])([H])[H]	3.05107	6.223177	2.003928	6.21269107	1.1488137600000004	3.0771881000000003
[H]C1=NC(=C(C([H])=C1[H])C1=C2C([H])=NC(C3=NC(=C([H])C([H])=C3[H])C([H])([H])[H])=C([H])C2=NN1[H])C([H])([H])[H]	2.97139	6.1817720000000005	2.056	6.17501252	1.19672	3.0110537
[H]C1C(=NC(C2C([H])=C([H])C(=C([H])C=2F)[N+](=O)[O-])=C(C=1[H])C([H])([H])[H])C1C(F)=C([H])C([H])=C([H])C=1[N+](=O)[O-]	3.17308	7.151923	2.7058880000000003	7.05784993	1.79461696	3.1784564
[H]C1C(=NC(C2C(F)=C([H])C([H])=C([H])C=2[N+](=O)[O-])=C(C=1[H])C([H])([H])[H])C1C([H])=C([H])C(=C([H])C=1F)[N+](=O)[O-]	2.96558	7.136726	2.663016	7.04402066	1.7551747199999999	3.0062314000000003
[H]C1=NC([H])=C([H])C2=C1N=C(C([H])=C2C1C2=NN([H])C([H])=C2C(=NC=1[H])OC([H])([H])[H])C1=C2C(=NC([H])=C([H])C2=NN1[H])OC([H])([H])[H]	2.67674	6.4191910000000005	2.655472	6.39106381	1.74823424	2.7664942000000003
[H]C1=NC([H])=C([H])C2=C1N=C(C([H])=C2C1=C2C(=NC([H])=C([H])C2=NN1[H])OC([H])([H])[H])C1C2=NN([H])C([H])=C2C(=NC=1[H])OC([H])([H])[H]	2.65433	6.407178999999998	2.615636	6.380132889999999	1.7115851199999996	2.7478939000000002
[H]C1=C([H])C(C2C([H])=C(C([H])=C3C=2N([H])C(=O)C3(C([H])([H])[H])C([H])([H])[H])C2C([H])=C(OC([H])([H])[H])C(=C([H])C=2[H])N([H])[H])=C(C(OC([H])([H])[H])=C1[H])N([H])[H]	3.2843	5.669715	1.0985560000000003	5.70904065	0.31587151999999996	3.270769
[H]C1=C([H])C(C2=C([H])C(C3C([H])=C(OC([H])([H])[H])C(=C([H])C=3[H])N([H])[H])=C3C(=C2[H])C(C(=O)N3[H])(C([H])([H])[H])C([H])([H])[H])=C(C(OC([H])([H])[H])=C1[H])N([H])[H]	3.22703	5.646419	1.0849399999999996	5.68784129	0.30334479999999964	3.2232349000000005
[H]C1=C([H])C(C2C([H])=C(C([H])=C3C=2C([H])=C([H])N3[H])C2C([H])=C(C#N)C(=C([H])C=2[H])N([H])[H])=C(C(C#N)=C1[H])N([H])[H]	3.15233	5.593548	1.128272	5.63972868	0.34321023999999944	3.1612339
[H]C1=C([H])C(C2=C([H])C(C3C([H])=C(C#N)C(=C([H])C=3[H])N([H])[H])=C3C([H])=C([H])N([H])C3=C2[H])=C(C(C#N)=C1[H])N([H])[H]	3.06767	5.583265000000001	1.1164959999999997	5.63037115	0.33237631999999984	3.0909661
[H]C(=O)C1SC(=NC=1[H])C1=C([H])C(C2N=C([H])SC=2C([H])=O)=C(OC([H])([H])[H])C2N=C([H])C([H])=C([H])C=21	2.6983199999999994	6.312448000000001	2.712512	6.29392768	1.8007110399999995	2.7844055999999995
[H]C(=O)C1SC(=NC=1[H])C1C([H])=C(C2N=C([H])SC=2C([H])=O)C2C([H])=C([H])C([H])=NC=2C=1OC([H])([H])[H]	2.58461	6.235189	2.762744	6.22362199	1.8469244800000002	2.6900263000000004
[H]C1=NC(=C(C([H])=C1[H])C1C([H])=C(N=C(C=1[H])C([H])([H])[H])C1C([H])=NC(=C([H])C=1[H])[N+](=O)[O-])[N+](=O)[O-]	2.68338	7.290151999999999	2.8260400000000003	7.183638319999999	1.9051568000000003	2.7720054000000003
[H]C1=NC(=C(C([H])=C1[H])C1N=C(C([H])=C(C=1[H])C1C([H])=NC(=C([H])C=1[H])[N+](=O)[O-])C([H])([H])[H])[N+](=O)[O-]	2.7016400000000003	7.213166000000001	2.892004	7.113581060000001	1.9658436799999999	2.7871612000000003
[H]C1=C([H])C(Cl)=C(C([H])=C1F)C1C([H])=C(F)C(=C(C2=C([H])C(Cl)=C([H])C([H])=C2F)C=1C(F)(F)F)N([H])[H]	3.31501	6.402447	1.6741080000000002	6.375826770000001	0.8453793599999999	3.2962583
[H]C1=C([H])C(Cl)=C(C([H])=C1F)C1=C(C(F)=C([H])C(C2=C([H])C(Cl)=C([H])C([H])=C2F)=C1C(F)(F)F)N([H])[H]	3.2768300000000004	6.372326	1.6618719999999998	6.34841666	0.8341222400000001	3.2645689000000004
[H]C1=C([H])C(=C([H])C(=C1Cl)C1=C2OC(F)(F)OC2=C([H])C(C2=C([H])C(Cl)=C([H])C([H])=C2C([H])([H])[H])=C1N([H])[H])C([H])([H])[H]	3.06684	6.191418	1.5074039999999995	6.18379038	0.6920116799999994	3.0902772
[H]C1=C([H])C(=C([H])C(=C1Cl)C1C([H])=C2OC(F)(F)OC2=C(C2=C([H])C(Cl)=C([H])C([H])=C2C([H])([H])[H])C=1N([H])[H])C([H])([H])[H]	3.2967499999999994	6.203976	1.5247000000000002	6.19521816	0.7079240000000002	3.2811024999999994
[H]C1=NC(C2C([H])=NC(F)=C(C3=NC([H])=C([H])N4C3=NC([H])=C4Cl)C=2[H])=C([H])N2C1=NC([H])=C2Cl	2.94151	6.660978	2.357852	6.61108998	1.47442384	2.9862533000000004
[H]C1=NC(C2=C(F)N=C([H])C(C3=NC([H])=C([H])N4C3=NC([H])=C4Cl)=C2[H])=C([H])N2C1=NC([H])=C2Cl	2.9697299999999998	6.619391	2.319396	6.57324581	1.4390443199999998	3.0096759
[H]C1=C([H])C(C2C(F)=C([H])C(=C([H])C=2F)C2=C([H])C([H])=C3C(=O)C(=O)N([H])C3=C2[H])=C2C(=O)C(=O)N([H])C2=C1[H]	1.76125	6.845435	3.101948	6.77894585	2.1589921600000004	2.0066375
[H]C1=C([H])C(C2C([H])=C(F)C(=C(F)C=2[H])C2=C([H])C([H])=C3C(=O)C(=O)N([H])C3=C2[H])=C2C(=O)C(=O)N([H])C2=C1[H]	1.85255	6.8376090000000005	3.0361679999999995	6.77182419	2.0984745599999997	2.0824165000000003
[H]C1=NC(=C(C([H])=C1C1C([H])=C(C#N)C(=C([H])C=1[H])N([H])[H])C1C([H])=C([H])C([H])=C(C#N)C=1N([H])[H])[N+](=O)[O-]	2.60453	6.4777949999999995	2.745448	6.44439345	1.8310121600000002	2.7065599000000002
[H]C1=NC(=C(C([H])=C1C1C([H])=C([H])C([H])=C(C#N)C=1N([H])[H])C1C([H])=C(C#N)C(=C([H])C=1[H])N([H])[H])[N+](=O)[O-]	2.27502	6.4222850000000005	2.728796	6.393879350000001	1.8156923200000001	2.4330666
[H]C1=NC([H])=C(C([H])=C1[H])C1=C([H])N=C(C2=NC([H])=C([H])C([H])=C2[H])C(=C1[H])[N+](=O)[O-]	3.0120599999999995	7.0821260000000015	2.925032	6.994334660000002	1.9962294399999996	3.0448097999999995
[H]C1=NC([H])=C(C2=NC([H])=C(C3=NC([H])=C([H])C([H])=C3[H])C([H])=C2[N+](=O)[O-])C([H])=C1[H]	3.1672700000000003	7.116979	2.7368	7.02605089	1.8230560000000002	3.1736341
[H]C1C2=NC(=NN2C([H])=C(C=1[H])C1=C(Cl)C(=C([H])C([H])=C1N([H])[H])C([H])([H])[H])C1C([H])=C(C(Cl)=C([H])C=1N([H])[H])C([H])([H])[H]	3.0419400000000003	5.929247	1.4913039999999995	5.94521477	0.6771996799999993	3.0696102000000005
[H]C1C2=NC(=NN2C([H])=C(C=1[H])C1C([H])=C(C(Cl)=C([H])C=1N([H])[H])C([H])([H])[H])C1=C(Cl)C(=C([H])C([H])=C1N([H])[H])C([H])([H])[H]	2.9938	5.930339	1.5221239999999998	5.94620849	0.7055540799999998	3.029654
[H]C1C([H])=C([H])C(=C(F)C=1[H])C1C(=NN=C(C=1[H])C1C([H])=C([H])C([H])=C(F)C=1[H])N([H])[H]	2.88424	6.3441160000000005	1.903096	6.32274556	1.0560483199999995	2.9387192000000004
[H]C1C([H])=C([H])C(C2=NN=C(C(=C2[H])C2C([H])=C([H])C([H])=C(F)C=2[H])N([H])[H])=C(F)C=1[H]	2.89337	6.303985	1.8582	6.28622635	1.0147440000000003	2.9462971000000002
[H]C1=NC(=C(C([H])=C1C1C([H])=C([H])C(C(=O)C([H])([H])[H])=C([H])C=1[H])C1C([H])=C([H])C([H])=C([H])C=1C(=O)C([H])([H])[H])C([H])([H])[H]	3.14984	6.7321399999999985	1.845596	6.6758473999999985	1.0031483200000002	3.1591672000000006
[H]C1=NC(=C(C([H])=C1C1C([H])=C([H])C([H])=C([H])C=1C(=O)C([H])([H])[H])C1C([H])=C([H])C(C(=O)C([H])([H])[H])=C([H])C=1[H])C([H])([H])[H]	3.04941	6.679086999999999	1.882396	6.627569169999999	1.0370043199999994	3.0758103
[H]C1N=C2C(=C([H])C(Cl)=C([H])N2C=1C1=C([H])C([H])=C(C(=C1[H])N([H])[H])C([H])([H])[H])C1C([H])=C([H])C([H])=C(C=1C([H])([H])[H])N([H])[H]	2.85353	5.827782	1.3890919999999998	5.85288162	0.5831646399999997	2.9132299
[H]C1N=C2C(=C([H])C(Cl)=C([H])N2C=1C1C([H])=C([H])C([H])=C(C=1C([H])([H])[H])N([H])[H])C1=C([H])C([H])=C(C(=C1[H])N([H])[H])C([H])([H])[H]	2.87594	5.7933840000000005	1.288628	5.821579440000001	0.49073776	2.9318302000000003
[H]C1C([H])=C(C(=C(C=1F)C1C([H])=C(C([H])=C(OC(F)(F)F)C=1N([H])[H])C1C([H])=C(C(=C([H])C=1F)N([H])[H])C([H])([H])[H])N([H])[H])C([H])([H])[H]	3.35485	5.7930199999999985	1.695544	5.8212481999999985	0.8651004799999997	3.3293255
[H]C1C([H])=C(C(=C(C=1F)C1C([H])=C(OC(F)(F)F)C(=C(C=1[H])C1C([H])=C(C(=C([H])C=1F)N([H])[H])C([H])([H])[H])N([H])[H])N([H])[H])C([H])([H])[H]	3.31086	5.740058	1.723052	5.77305278	0.89040784	3.2928138000000002
[H]C1=NC(=C([H])N=C1C1=C([H])N=C(C([H])=C1C([H])([H])[H])N([H])[H])C1C(=NC([H])=C([H])C=1C([H])([H])[H])N([H])[H]	3.01455	6.146828	1.855808	6.14321348	1.0125433599999996	3.0468764999999998
[H]C1=NC(=C([H])N=C1C1C(=NC([H])=C([H])C=1C([H])([H])[H])N([H])[H])C1=C([H])N=C(C([H])=C1C([H])([H])[H])N([H])[H]	2.91246	6.158385	1.942104	6.15373035	1.0919356799999997	2.9621418
[H]C1=C([H])C(=C([H])C(=C1[H])N([H])C(=S)C([H])([H])[H])C1C(Cl)=C(C([H])=C(OC([H])([H])[H])C=1N([H])[H])C1C([H])=C([H])C([H])=C([H])C=1N([H])C(=S)C([H])([H])[H]	2.48086	5.871917	1.7556200000000002	5.8930444699999995	0.9203704000000004	2.6039138
[H]C1=C([H])C(=C([H])C(=C1[H])N([H])C(=S)C([H])([H])[H])C1C([H])=C(OC([H])([H])[H])C(=C(C=1Cl)C1C([H])=C([H])C([H])=C([H])C=1N([H])C(=S)C([H])([H])[H])N([H])[H]	2.52236	5.87401	1.7415440000000002	5.8949491	0.9074204799999999	2.6383588000000002
[H]C1=NC2C([H])=C([H])C(=C([H])C=2S1)C1C([H])=C2OC([H])([H])C([H])([H])C([H])(C2=C(C2=NC3C([H])=C([H])C([H])=C([H])C=3S2)C=1[H])N([H])[H]	3.13822	6.2654010000000016	1.8759559999999995	6.251114910000002	1.0310795199999996	3.1495226
[H]C1=NC2C([H])=C([H])C(=C([H])C=2S1)C1C([H])=C(C2=NC3C([H])=C([H])C([H])=C([H])C=3S2)C([H])=C2OC([H])([H])C([H])([H])C([H])(C=12)N([H])[H]	3.17557	6.201428	1.87752	6.1928994799999995	1.0325183999999998	3.1805231000000003
[H]C1=C(F)C(=C(C2C([H])=C(C(=C([H])C=2Cl)N([H])[H])C([H])([H])[H])C(=C1C1C(Cl)=C([H])C([H])=C(C=1N([H])[H])C([H])([H])[H])C(F)(F)F)N([H])[H]	3.2179	6.1316310000000005	1.7374039999999995	6.12938421	0.90361168	3.215657
[H]C1=C(F)C(=C(C2C(Cl)=C([H])C([H])=C(C=2N([H])[H])C([H])([H])[H])C(=C1C1C([H])=C(C(=C([H])C=1Cl)N([H])[H])C([H])([H])[H])C(F)(F)F)N([H])[H]	3.2502699999999995	6.131722	1.90328	6.12946702	1.0562176	3.2425241
[H]C1N=C2C([H])=C([H])C(C3=C([H])C([H])=C(F)C([H])=C3OC([H])([H])[H])=C([H])N2C=1C1C([H])=C([H])C(OC([H])([H])[H])=C([H])C=1F	2.88009	5.742151	0.9995639999999996	5.77495741	0.22479887999999892	2.9352747
[H]C1N=C2C([H])=C([H])C(C3C([H])=C([H])C(OC([H])([H])[H])=C([H])C=3F)=C([H])N2C=1C1=C([H])C([H])=C(F)C([H])=C1OC([H])([H])[H]	2.95147	5.7003819999999985	1.0138239999999996	5.736947619999999	0.23791807999999914	2.9945201
[H]C1=NC2C(C([H])=C1[H])=C([H])C([H])=C([H])C=2C1C2=NSN=C2C(C2C([H])=C([H])C([H])=C3N=C([H])C([H])=C([H])C=23)=C2C([H])=C([H])C([H])=C([H])C=12	2.0998900000000003	5.9156879999999985	3.183552	5.932876079999999	2.23406784	2.2877087000000005
[H]C1=NC2C(C([H])=C1[H])=C([H])C([H])=C([H])C=2C1C2=NSN=C2C(C2C([H])=C([H])C([H])=C3N=C([H])C([H])=C([H])C=23)=C2C([H])=C([H])C([H])=C([H])C=12	2.15218	5.925243	3.174904	5.94157113	2.22611168	2.3311094
[H]C1=NC2C(=C([H])C(=C([H])C=2C2C([H])=C(F)C(=C([H])C=2C(F)(F)F)N([H])[H])[N+](=O)[O-])C([H])=C1C1=C(C(F)=C([H])C([H])=C1C(F)(F)F)N([H])[H]	2.86515	6.348210999999999	2.7805	6.326472009999999	1.86326	2.9228745
[H]C1=NC2C(=C([H])C(=C([H])C=2C2=C(C(F)=C([H])C([H])=C2C(F)(F)F)N([H])[H])[N+](=O)[O-])C([H])=C1C1C([H])=C(F)C(=C([H])C=1C(F)(F)F)N([H])[H]	2.9108	6.382517999999999	2.78602	6.3576913799999994	1.8683383999999998	2.960764
[H]C1C2=NC(=NN2C(=C([H])C=1[H])C1C([H])=C([H])C([H])=C2SC(Cl)=NC=12)C1C([H])=C([H])C([H])=C2N=C(Cl)SC=12	3.0759699999999994	6.458321	2.07808	6.42667211	1.2170335999999997	3.0978550999999994
[H]C1C2=NC(=NN2C(=C([H])C=1[H])C1C([H])=C([H])C([H])=C2N=C(Cl)SC=12)C1C([H])=C([H])C([H])=C2SC(Cl)=NC=12	2.92657	6.444216	2.1503919999999996	6.41383656	1.2835606399999993	2.9738531000000004
[H]C1N=C2C(=C([H])C(Cl)=C([H])N2C=1[H])C1C([H])=C(C(=C([H])C=1[N+](=O)[O-])C1=C([H])N=C2C([H])=C([H])C(Cl)=C([H])N21)N([H])C(=O)C([H])([H])[H]	2.2219	6.4429419999999995	2.660992	6.412677219999999	1.7533126399999999	2.388977
[H]C1N=C2C(=C([H])C(Cl)=C([H])N2C=1[H])C1=C([H])C(=C(C([H])=C1N([H])C(=O)C([H])([H])[H])C1=C([H])N=C2C([H])=C([H])C(Cl)=C([H])N21)[N+](=O)[O-]	2.80954	6.492537	2.597512	6.45780867	1.69491104	2.8767182
[H]C1C2=NC(=NN2C(=C([H])C=1[H])C1=C([H])C([H])=C(F)C(F)=C1OC([H])([H])[H])C1C([H])=C([H])C(OC([H])([H])[H])=C(F)C=1F	3.3258	6.519382	1.746788	6.48223762	0.9122449599999998	3.3052140000000003
[H]C1C2=NC(=NN2C(=C([H])C=1[H])C1C([H])=C([H])C(OC([H])([H])[H])=C(F)C=1F)C1=C([H])C([H])=C(F)C(F)=C1OC([H])([H])[H]	3.37477	6.426926	1.5793480000000004	6.39810266	0.7582001600000003	3.3458591
[H]C1=C(Cl)C([H])=C(Cl)C(=C1C1=C([H])C(=C(F)C(C#N)=C1N([H])[H])C1C(Cl)=C([H])C([H])=C(C=1Cl)C([H])([H])[H])C([H])([H])[H]	3.17142	6.5158330000000015	1.6317880000000002	6.479008030000001	0.8064449600000003	3.1770785999999998
[H]C1=C(Cl)C([H])=C(Cl)C(=C1C1C([H])=C(C2C(Cl)=C([H])C([H])=C(C=2Cl)C([H])([H])[H])C(=C(C#N)C=1F)N([H])[H])C([H])([H])[H]	3.05024	6.526116	1.623876	6.48836556	0.7991659200000001	3.0764992
[H]C1N=C2C(=C([H])C(Cl)=C([H])N2C=1C1C([H])=C([H])C(=C([H])C=1[H])C1C([H])=C([H])C([H])=C([H])C=1[H])C1C([H])=C([H])C([H])=C([H])C=1C1C([H])=C([H])C([H])=C([H])C=1[H]	2.80871	5.9692870000000005	1.6054760000000003	5.98165117	0.78223792	2.8760293
[H]C1N=C2C(=C([H])C(Cl)=C([H])N2C=1C1C([H])=C([H])C([H])=C([H])C=1C1C([H])=C([H])C([H])=C([H])C=1[H])C1C([H])=C([H])C(=C([H])C=1[H])C1C([H])=C([H])C([H])=C([H])C=1[H]	2.9373599999999995	5.947447	1.485324	5.96177677	0.6716980800000005	2.9828088
[H]C1=C([H])C(=C(Cl)C(=C1[H])C([H])([H])[H])C1C([H])=C(Cl)C(=C(C=1F)C1=C([H])C([H])=C(Cl)C(=C1[H])C([H])([H])[H])N([H])[H]	3.35734	6.250568	1.2321400000000002	6.23761688	0.43876880000000007	3.3313922000000002
[H]C1=C([H])C(=C(Cl)C(=C1[H])C([H])([H])[H])C1C(F)=C(C([H])=C(Cl)C=1N([H])[H])C1=C([H])C([H])=C(Cl)C(=C1[H])C([H])([H])[H]	3.41793	6.25439	1.2772199999999998	6.2410949	0.48024239999999985	3.3816819000000002
[H]C1=NC([H])=C(C2=C([H])C([H])=C([H])C([H])=C12)C1C([H])=C(C(C2=NC([H])=C([H])C3=C([H])C([H])=C([H])C([H])=C23)=C([H])C=1N([H])[H])C([H])([H])[H]	2.8883900000000002	5.776002999999998	1.7385079999999995	5.805762729999999	0.9046273599999992	2.9421637
[H]C1=NC([H])=C(C2=C([H])C([H])=C([H])C([H])=C12)C1=C([H])C(=C(C2=NC([H])=C([H])C3=C([H])C([H])=C([H])C([H])=C23)C([H])=C1C([H])([H])[H])N([H])[H]	3.02949	5.839339	1.7434760000000002	5.86339849	0.9091979200000004	3.0592767
[H]C1=C2SC(=NC2=C(C([H])=C1C1C(=NC(=C([H])C=1C([H])([H])[H])C([H])([H])[H])C([H])([H])[H])C1=C(N=C(C([H])=C1C([H])([H])[H])C([H])([H])[H])C([H])([H])[H])N([H])[H]	3.4029899999999995	6.128901	1.280532	6.12689991	0.48328944000000007	3.3692816999999997
[H]C1=C2SC(=NC2=C(C([H])=C1C1=C(N=C(C([H])=C1C([H])([H])[H])C([H])([H])[H])C([H])([H])[H])C1C(=NC(=C([H])C=1C([H])([H])[H])C([H])([H])[H])C([H])([H])[H])N([H])[H]	3.3714500000000003	6.133906	1.1879799999999996	6.13145446	0.39814159999999976	3.3431035000000002
[H]C1=NC([H])=C(C(=N1)C([H])([H])[H])C1C(Cl)=C([H])C(C2=NC([H])=C([H])C(=N2)C([H])([H])[H])=C(C=1Cl)C([H])([H])[H]	3.43121	6.884929	1.7902119999999997	6.81488539	0.9521950399999994	3.3927043
[H]C1=NC([H])=C(C(=N1)C([H])([H])[H])C1C([H])=C(Cl)C(C2=NC([H])=C([H])C(=N2)C([H])([H])[H])=C(Cl)C=1C([H])([H])[H]	3.05356	6.8871129999999985	2.155912	6.8168728299999986	1.2886390399999996	3.0792548
[H]C1=NC(OC([H])([H])[H])=C(C([H])=C1[H])C1C([H])=C([H])C2N=C(SC=2C=1[H])C1C([H])=NC(OC([H])([H])[H])=C([H])C=1[H]	3.00044	6.185503	1.994176	6.17840773	1.1398419199999994	3.0351652000000002
[H]C1=NC(OC([H])([H])[H])=C(C2=NC3C([H])=C([H])C(=C([H])C=3S2)C2C([H])=NC(OC([H])([H])[H])=C([H])C=2[H])C([H])=C1[H]	3.1440300000000003	6.213622	1.935848	6.20399602	1.0861801599999996	3.1543449000000003
[H]C1=NN(C(=N1)C1=C([H])N=C(C2=NN(C([H])=N2)C([H])([H])[H])C2=C([H])C([H])=C([H])C([H])=C12)C([H])([H])[H]	2.7149199999999998	6.279324	2.192528	6.26378484	1.32232576	2.7981835999999998
[H]C1=NN(C(=N1)C1=NC([H])=C(C2=NN(C([H])=N2)C([H])([H])[H])C2=C([H])C([H])=C([H])C([H])=C12)C([H])([H])[H]	2.9025	6.426653	2.063268	6.39785423	1.2034065599999995	2.953875
[H]C1=NN([H])C2C1=C([H])C(=C([H])C=2C1C([H])=C([H])C([H])=C(C=1[H])C([H])([H])[H])C1C([H])=C([H])C([H])=C([H])C=1C([H])([H])[H]	3.32829	5.919783	1.1551359999999995	5.93660253	0.3679251199999998	3.3072806999999997
[H]C1=NN([H])C2C1=C([H])C(=C([H])C=2C1C([H])=C([H])C([H])=C([H])C=1C([H])([H])[H])C1C([H])=C([H])C([H])=C(C=1[H])C([H])([H])[H]	3.2934300000000003	5.9259710000000005	1.1768479999999997	5.942233610000001	0.38790015999999916	3.2783469000000003
[H]C1N=C2C(=C([H])C(Cl)=C([H])N2C=1C1C([H])=C(C([H])=C([H])C=1[N+](=O)[O-])N([H])[H])C1=C([H])C(=C([H])C([H])=C1N([H])[H])[N+](=O)[O-]	2.5281700000000003	6.1509230000000015	2.2819519999999995	6.146939930000001	1.4045958399999994	2.6431811000000005
[H]C1N=C2C(=C([H])C(Cl)=C([H])N2C=1C1=C([H])C(=C([H])C([H])=C1N([H])[H])[N+](=O)[O-])C1C([H])=C(C([H])=C([H])C=1[N+](=O)[O-])N([H])[H]	2.4675800000000003	6.154654	2.30118	6.15033514	1.4222856	2.5928914000000005
[H]C1=C([H])C(=C(Cl)C(OC(F)(F)F)=C1[H])C1N=C(C([H])=C(C2C([H])=C(OC(F)(F)F)C(Cl)=C([H])C=2[H])C=1N([H])[H])C(F)(F)F	3.0792900000000003	6.708116	2.11028	6.653985560000001	1.2466575999999998	3.1006107000000007
[H]C1=C([H])C(=C(Cl)C(OC(F)(F)F)=C1[H])C1=C([H])C(=NC(C2C([H])=C(OC(F)(F)F)C(Cl)=C([H])C=2[H])=C1N([H])[H])C(F)(F)F	2.9838400000000003	6.664891000000001	2.048364	6.6146508100000005	1.1896948799999993	3.0213872000000004
[H]C1=C([H])C(Cl)=C(C([H])=C1Cl)C1=C([H])C2=NC(=NN2C([H])=C1[H])C1=C([H])C(Cl)=C([H])C([H])=C1Cl	3.4992699999999988	6.684819999999999	1.9550759999999998	6.6327862	1.1038699200000002	3.4491940999999993
[H]C1=C([H])C(Cl)=C(C2=NN3C(=N2)C([H])=C(C([H])=C3[H])C2=C([H])C(Cl)=C([H])C([H])=C2Cl)C([H])=C1Cl	3.49263	6.6928279999999996	1.9483599999999999	6.64007348	1.0976911999999999	3.4436829
[H]C1=C([H])C(=C([H])C(=C1[H])C([H])([H])C([H])([H])[H])C1C([H])=C(C([H])=C(C#N)C=1N([H])[H])C1C([H])=C([H])C([H])=C([H])C=1C([H])([H])C([H])([H])[H]	3.1681	5.96319	1.1660839999999997	5.9761029	0.37799727999999977	3.1743230000000002
[H]C1=C([H])C(=C([H])C(=C1[H])C([H])([H])C([H])([H])[H])C1C([H])=C(C#N)C(=C(C=1[H])C1C([H])=C([H])C([H])=C([H])C=1C([H])([H])C([H])([H])[H])N([H])[H]	3.05771	5.987851	1.1797000000000004	5.99854441	0.3905240000000001	3.0826993000000003
[H]C1N=C(SC=1C1C([H])=C(C(=C([H])C=1F)N([H])[H])C([H])([H])[H])C1C(F)=C([H])C([H])=C(C=1N([H])[H])C([H])([H])[H]	2.89005	5.740968	1.6408040000000002	5.77388088	0.8147396799999997	2.9435415000000003
[H]C1N=C(SC=1C1C(F)=C([H])C([H])=C(C=1N([H])[H])C([H])([H])[H])C1C([H])=C(C(=C([H])C=1F)N([H])[H])C([H])([H])[H]	2.71077	5.61739	1.6595719999999998	5.6614249	0.8320062400000001	2.7947391
[H]C1=NC(=C([H])C2=NN([H])C([H])=C12)C1C(Cl)=NC([H])=C(C2=C3C([H])=NC([H])=C([H])C3=NN2[H])C=1C([H])([H])[H]	3.2419700000000002	6.589816000000001	1.9959240000000003	6.546332560000001	1.1414500800000003	3.2356351000000005
[H]C1=NC(=C([H])C2=NN([H])C([H])=C12)C1=C([H])N=C(Cl)C(C2=C3C([H])=NC([H])=C([H])C3=NN2[H])=C1C([H])([H])[H]	3.15814	6.558421000000001	2.020764	6.517763110000001	1.1643028799999993	3.1660562
[H]C1=NC(=C(C([H])=C1C1C([H])=C(C#N)C([H])=C([H])C=1F)C1=C([H])C(F)=C([H])C([H])=C1C#N)C([H])([H])[H]	3.6760599999999988	6.841249	1.844492	6.775136590000001	1.0021326400000001	3.595929799999999
[H]C1=NC(=C(C([H])=C1C1=C([H])C(F)=C([H])C([H])=C1C#N)C1C([H])=C(C#N)C([H])=C([H])C=1F)C([H])([H])[H]	3.6802099999999998	6.854444	1.8027240000000002	6.787144039999999	0.9637060800000006	3.5993743
[H]C1=NC(=C(C2=NN3C(=N2)C([H])=C(C2=NC(=C([H])C([H])=C2[H])C([H])([H])[H])C([H])=C3[H])C([H])=C1[H])C([H])([H])[H]	3.43951	6.551869	1.740716	6.511800790000001	0.9066587200000003	3.3995933000000003
[H]C1=NC(=C(C([H])=C1[H])C1=C([H])C2=NC(=NN2C([H])=C1[H])C1=NC(=C([H])C([H])=C1[H])C([H])([H])[H])C([H])([H])[H]	3.19217	6.5066419999999985	1.970532	6.470644219999999	1.1180894399999994	3.1943011
[H]C1=C([H])C(=C([H])C(C2=NC(=C(OC([H])([H])C([H])([H])[H])C([H])=C2N([H])[H])C2=C([H])C(F)=C([H])C([H])=C2[N+](=O)[O-])=C1F)[N+](=O)[O-]	2.67342	6.084675	2.439916	6.08665425	1.54992272	2.7637386000000004
[H]C1=C([H])C(=C([H])C(=C1F)C1N=C(C2=C([H])C(F)=C([H])C([H])=C2[N+](=O)[O-])C(=C([H])C=1OC([H])([H])C([H])([H])[H])N([H])[H])[N+](=O)[O-]	2.7597400000000003	6.1313580000000005	2.389132	6.12913578	1.5032014399999998	2.8353842000000005
[H]C1=NN=C(C2=C(Cl)N=C(C(C3=NN=C([H])C(=C3[H])C([H])([H])[H])=C2[H])N([H])[H])C(=C1[H])C([H])([H])[H]	2.85934	6.268676999999999	1.8753119999999999	6.254096069999999	1.0304870399999997	2.9180522
[H]C1=NN=C(C2C(=NC(Cl)=C(C3=NN=C([H])C(=C3[H])C([H])([H])[H])C=2[H])N([H])[H])C(=C1[H])C([H])([H])[H]	2.8195	6.293247	1.823148	6.27645477	0.9824961599999993	2.8849850000000004
[H]C1=C([H])C(=C(Cl)C(=C1[H])C([H])([H])[H])C1C([H])=C2OC(F)(F)OC2=C(C2=C([H])C([H])=C(Cl)C(=C2[H])C([H])([H])[H])C=1N([H])[H]	2.9672400000000003	6.208708000000001	1.607132	6.19952428	0.7837614400000001	3.0076092000000005
[H]C1=C([H])C(=C(Cl)C(=C1[H])C([H])([H])[H])C1=C2OC(F)(F)OC2=C([H])C(C2=C([H])C([H])=C(Cl)C(=C2[H])C([H])([H])[H])=C1N([H])[H]	3.00293	6.214532	1.6063039999999995	6.20482412	0.7829996799999996	3.0372319
[H]SC1C([H])=C(C([H])=C([H])C=1C1=C([H])C([H])=C(C(C(=O)C([H])([H])[H])=C1[H])N([H])[H])C1C([H])=C([H])C([H])=C(C(=O)C([H])([H])[H])C=1N([H])[H]	2.5788	5.867367	1.6554320000000002	5.888903969999999	0.8281974400000003	2.6852040000000006
[H]SC1C([H])=C(C([H])=C([H])C=1C1C([H])=C([H])C([H])=C(C(=O)C([H])([H])[H])C=1N([H])[H])C1=C([H])C([H])=C(C(C(=O)C([H])([H])[H])=C1[H])N([H])[H]	2.6535	5.767449	1.6382279999999998	5.79797859	0.8123697599999993	2.747205
[H]C(=O)C1C(F)=C([H])C(=C([H])C=1C1C([H])=C(Cl)C([H])=C([H])C=1Cl)C1=C([H])C(Cl)=C([H])C([H])=C1Cl	2.88922	6.971561	2.47828	6.8937205100000005	1.5852176	2.9428526
[H]C(=O)C1C(F)=C([H])C(=C([H])C=1C1=C([H])C(Cl)=C([H])C([H])=C1Cl)C1C([H])=C(Cl)C([H])=C([H])C=1Cl	2.9025	6.9693770000000015	2.4525200000000003	6.891733070000001	1.5615184000000002	2.953875
[H]C1=NC(=C([H])C2=NN([H])C(C3C([H])=C(F)C(=C([H])C=3F)N([H])[H])=C12)C1C(F)=C([H])C([H])=C(F)C=1N([H])[H]	3.04858	5.978569	1.7698799999999997	5.99009779	0.9334895999999997	3.0751214
[H]C1=NC(=C([H])C2=NN([H])C(C3C(F)=C([H])C([H])=C(F)C=3N([H])[H])=C12)C1C([H])=C(F)C(=C([H])C=1F)N([H])[H]	2.9307199999999995	5.91314	1.7705240000000002	5.9305574000000005	0.9340820799999996	2.9772976
[H]C1=C([H])C(C2=C(C([H])=C(C([H])=C2C([H])([H])[H])C([H])([H])[H])N([H])[H])=C2C(C([H])=C([H])N2[H])=C1C1C(=C([H])C(=C([H])C=1C([H])([H])[H])N([H])[H])C([H])([H])[H]	3.32331	5.6183000000000005	0.9183279999999998	5.662253000000001	0.15006175999999982	3.3031473
[H]C1=C([H])C(C2C(=C([H])C(=C([H])C=2C([H])([H])[H])N([H])[H])C([H])([H])[H])=C2C(C([H])=C([H])N2[H])=C1C1=C(C([H])=C(C([H])=C1C([H])([H])[H])C([H])([H])[H])N([H])[H]	3.32165	5.6432340000000005	0.9132679999999996	5.684942940000001	0.14540655999999963	3.3017695
[H]C1=NC(C(=O)OC([H])([H])[H])=C(C2C3=NSN=C3C(C3=NC(C(=O)OC([H])([H])[H])=C([H])N3[H])=C(F)C=2[H])N1[H]	2.15218	6.503730000000001	3.570136	6.467994300000001	2.58972512	2.3311094
[H]C1=NC(C(=O)OC([H])([H])[H])=C(C2C3=NSN=C3C(C3=NC(C(=O)OC([H])([H])[H])=C([H])N3[H])=C([H])C=2F)N1[H]	2.1306	6.520383000000002	3.606568	6.483148530000001	2.62324256	2.313198
[H]C1=NC(F)=C(C([H])=C1[H])C1C([H])=C([H])C(=C(C#N)C=1[H])C1C([H])=NC(F)=C([H])C=1[H]	3.55571	6.918235000000001	1.931524	6.845193850000001	1.08220208	3.4960393
[H]C1=NC(F)=C(C([H])=C1[H])C1C([H])=C([H])C(=C([H])C=1C#N)C1C([H])=NC(F)=C([H])C=1[H]	3.5797799999999995	6.910317999999999	1.883592	6.83798938	1.0381046400000002	3.5160174
[H]C1N=C(C2=C([H])N=C(Cl)C([H])=C2N([H])[H])C(=C(C=1[H])C1C(Cl)=NC([H])=C([H])C=1N([H])[H])[N+](=O)[O-]	2.48667	7.184410000000001	2.946376	7.087413100000001	2.0158659199999995	2.6087361000000002
[H]C1N=C(C2C(Cl)=NC([H])=C([H])C=2N([H])[H])C(=C(C=1[H])C1=C([H])N=C(Cl)C([H])=C1N([H])[H])[N+](=O)[O-]	2.5895900000000003	7.146372	2.857596	7.0527985200000005	1.9341883199999996	2.6941597
[H]C1=NN2C(=N1)C(=NC([H])=C2[H])C1=NN([H])C(C2N=C([H])C3=NC([H])=NN3C=2[H])=C1[N+](=O)[O-]	2.89586	7.511373	3.133228	7.38494943	2.18776976	2.9483638
[H]C1=NN2C(=N1)C(=NC([H])=C2[H])C1=C(C(=NN1[H])C1N=C([H])C2=NC([H])=NN2C=1[H])[N+](=O)[O-]	2.82531	7.457592	3.09146	7.336008720000001	2.1493432	2.8898073
[H]C1N=C(C2=C([H])C([H])=C(Cl)C(=C2[H])C([H])(C([H])([H])[H])C([H])([H])[H])C(=C(C=1[H])C1C([H])=C([H])C([H])=C(C=1Cl)C([H])(C([H])([H])[H])C([H])([H])[H])[N+](=O)[O-]	3.0104	7.2888779999999995	2.721804	7.182478979999999	1.8092596800000003	3.043432
[H]C1N=C(C2C([H])=C([H])C([H])=C(C=2Cl)C([H])(C([H])([H])[H])C([H])([H])[H])C(=C(C=1[H])C1=C([H])C([H])=C(Cl)C(=C1[H])C([H])(C([H])([H])[H])C([H])([H])[H])[N+](=O)[O-]	3.0104	7.2276349999999985	2.7234599999999998	7.126747849999999	1.8107831999999995	3.043432
[H]C1C([H])=C([H])C(=C(C(=O)OC([H])([H])[H])C=1[H])C1=C(C(=NN1C([H])([H])[H])C1C([H])=C([H])C(C(=O)OC([H])([H])[H])=C([H])C=1[H])[N+](=O)[O-]	3.30173	7.544042000000001	2.746092	7.414678220000001	1.8316046400000001	3.2852359
[H]C1C([H])=C([H])C(C2=NN(C(C3C([H])=C([H])C(C(=O)OC([H])([H])[H])=C([H])C=3[H])=C2[N+](=O)[O-])C([H])([H])[H])=C(C(=O)OC([H])([H])[H])C=1[H]	3.1996400000000005	7.558510999999998	2.7618240000000003	7.427845009999999	1.8460780799999998	3.2005012000000006
[H]C1=NC([H])=C(C(OC([H])([H])[H])=C1[H])C1C([H])=C([H])C(C2C([H])=NC([H])=C([H])C=2OC([H])([H])[H])=C(C=1[H])[N+](=O)[O-]	2.74895	6.9574560000000005	2.562736	6.88088496	1.6629171200000004	2.8264285
[H]C1=NC([H])=C(C(OC([H])([H])[H])=C1[H])C1C([H])=C([H])C(=C([H])C=1[N+](=O)[O-])C1C([H])=NC([H])=C([H])C=1OC([H])([H])[H]	2.72737	6.944989	2.55234	6.86953999	1.6533528	2.8085171000000004
[H]C1=C([H])C(=C([H])C(=C1Cl)C1=C([H])C([H])=C(Cl)C(C#N)=C1N([H])[H])C1C([H])=C([H])C(=C(C#N)C=1Cl)N([H])[H]	3.0344700000000002	6.374328	1.7156919999999998	6.35023848	0.8836366399999998	3.0634101000000005
[H]C1=C([H])C(=C([H])C(=C1Cl)C1C([H])=C([H])C(=C(C#N)C=1Cl)N([H])[H])C1=C([H])C([H])=C(Cl)C(C#N)=C1N([H])[H]	3.01289	6.384156	1.6844119999999998	6.35918196	0.85485904	3.0454987000000004
[H]C1N=C(C([H])=C(C=1C1C([H])=C([H])C(C(=O)N([H])[H])=C([H])C=1[H])C([H])([H])[H])C1C([H])=C([H])C([H])=C([H])C=1C(=O)N([H])[H]	3.5366199999999988	6.668713	1.8332680000000001	6.61812883	0.9918065600000006	3.480194599999999
[H]C1N=C(C([H])=C(C=1C1C([H])=C([H])C([H])=C([H])C=1C(=O)N([H])[H])C([H])([H])[H])C1C([H])=C([H])C(C(=O)N([H])[H])=C([H])C=1[H]	3.7391400000000004	6.676812	1.6360200000000005	6.62549892	0.8103384	3.6482862000000003
[H]C1=C([H])C(=C(C2N=C(C([H])=C(C=2[H])C2C([H])=C([H])C(=C([H])C=2C([H])([H])[H])N([H])[H])N([H])[H])C(=C1[H])C([H])([H])[H])N([H])[H]	3.3349300000000004	5.7168529999999995	0.9269759999999998	5.75193623	0.1580179199999998	3.3127919000000006
[H]C1=C([H])C(=C(C2C([H])=C(N=C(C=2[H])N([H])[H])C2C([H])=C([H])C(=C([H])C=2C([H])([H])[H])N([H])[H])C(=C1[H])C([H])([H])[H])N([H])[H]	3.2502699999999995	5.738055999999999	0.9516319999999999	5.77123096	0.18070144	3.2425241
[H]C1N=C(C([H])=C(C2C([H])=C([H])C([H])=C(C=2C([H])([H])[H])[N+](=O)[O-])C=1[N+](=O)[O-])C1=C([H])C([H])=C(C(=C1[H])[N+](=O)[O-])C([H])([H])[H]	2.99297	7.526569999999999	2.984096	7.398778699999999	2.05056832	3.0289651
[H]C1N=C(C([H])=C(C2=C([H])C([H])=C(C(=C2[H])[N+](=O)[O-])C([H])([H])[H])C=1[N+](=O)[O-])C1C([H])=C([H])C([H])=C(C=1C([H])([H])[H])[N+](=O)[O-]	2.88673	7.48562	3.072324	7.3615142	2.13173808	2.9407859000000003
[H]C1=NC(C#N)=C(C([H])=C1[H])C1C([H])=C([H])C2=NC([H])=C(C3C([H])=NC(C#N)=C([H])C=3[H])N2C=1[H]	2.7995799999999997	6.157293	2.0249040000000003	6.15273663	1.16811168	2.8684513999999997
[H]C1=NC(C#N)=C(C([H])=C1[H])C1=C([H])N=C2C([H])=C([H])C(C3C([H])=NC(C#N)=C([H])C=3[H])=C([H])N21	2.861	6.1375459999999995	2.020396	6.134766859999999	1.1639643199999998	2.91943
[H]C1=C(C2=C(N=C(C([H])=C2C([H])([H])[H])C([H])([H])[H])C([H])([H])[H])C(=C([H])C(OC([H])([H])[H])=C1C1C(=NC(=C([H])C=1C([H])([H])[H])C([H])([H])[H])C([H])([H])[H])C([H])([H])[H]	3.62294	6.257484	1.3996719999999998	6.24391044	0.5928982399999994	3.5518402
[H]C1=C(C2C(=NC(=C([H])C=2C([H])([H])[H])C([H])([H])[H])C([H])([H])[H])C(=C([H])C(OC([H])([H])[H])=C1C1=C(N=C(C([H])=C1C([H])([H])[H])C([H])([H])[H])C([H])([H])[H])C([H])([H])[H]	3.608	6.255118	1.3684839999999996	6.24175738	0.5642052799999995	3.5394400000000004
[H]C1N=C2C([H])=C([H])C(C3C(=C([H])C([H])=C([H])C=3C([H])([H])[H])C([H])([H])[H])=C([H])N2C=1C1=C([H])C(=C([H])C(=C1[H])C([H])([H])[H])C([H])([H])[H]	3.07514	5.808126000000001	0.9684679999999996	5.83499466	0.1961905599999998	3.0971662
[H]C1N=C2C([H])=C([H])C(C3=C([H])C(=C([H])C(=C3[H])C([H])([H])[H])C([H])([H])[H])=C([H])N2C=1C1C(=C([H])C([H])=C([H])C=1C([H])([H])[H])C([H])([H])[H]	3.05605	5.698835	0.8113320000000002	5.73553985	0.05162543999999958	3.0813215
[H]C1=NC(C2=C([H])C(F)=C(C3=NC([H])=C(N3[H])C([H])([H])[H])C([H])=C2[N+](=O)[O-])=C(N1[H])C([H])([H])[H]	2.26589	6.184866	2.499256	6.17782806	1.6045155199999996	2.4254887000000003
[H]C1=NC(C2C([H])=C(C(C3=NC([H])=C(N3[H])C([H])([H])[H])=C([H])C=2F)[N+](=O)[O-])=C(N1[H])C([H])([H])[H]	2.81203	6.210619	2.258768	6.20126329	1.38326656	2.8787849000000003
[H]C1=NC2=C([H])C(=C([H])C([H])=C2C([H])=C1[H])C1C([H])=C(F)C(=C([H])C=1F)C1C([H])=C([H])C([H])=C2N=C([H])C([H])=C([H])C=12	3.3208199999999994	6.480252	1.9918759999999998	6.44662932	1.1377259199999994	3.3010805999999997
[H]C1=NC2=C([H])C(=C([H])C([H])=C2C([H])=C1[H])C1=C([H])C(F)=C(C([H])=C1F)C1C([H])=C([H])C([H])=C2N=C([H])C([H])=C([H])C=12	3.34157	6.494721	1.989668	6.45979611	1.1356945600000001	3.3183031
[H]C1C(=NC(=C(F)C=1[H])C1C(=NC(=C([H])C=1[H])C([H])([H])[H])C([H])([H])[H])C1C([H])=C([H])C(=NC=1C([H])([H])[H])C([H])([H])[H]	3.62045	6.6764480000000015	1.6038199999999998	6.6251676800000014	0.7807143999999999	3.5497735
[H]C1C(=NC(=C(F)C=1[H])C1C([H])=C([H])C(=NC=1C([H])([H])[H])C([H])([H])[H])C1C(=NC(=C([H])C=1[H])C([H])([H])[H])C([H])([H])[H]	3.6246	6.685639	1.6229559999999998	6.63353149	0.7983195199999997	3.553218
[H]C1N=C2C(=NC=1[H])N([H])C([H])=C2C1=NC([H])=C(C(=N1)C([H])([H])[H])C1N=C2C(=NC=1[H])N([H])C([H])=C2[H]	2.86349	6.442851	2.28094	6.4125944100000005	1.4036648	2.9214967000000005
[H]C1N=C2C(=NC=1[H])N([H])C([H])=C2C1C(=NC(=NC=1[H])C1N=C2C(=NC=1[H])N([H])C([H])=C2[H])C([H])([H])[H]	3.05356	6.487805000000001	2.157476	6.453502550000001	1.2900779199999999	3.0792548
[H]C1N=C2C([H])=C([H])C(C3=NC(C4=C([H])N=C5C([H])=C([H])C([H])=C([H])N54)=C(N3[H])C(F)(F)F)=C([H])N2C=1[H]	2.89088	5.824597000000002	1.3374800000000002	5.849983270000001	0.5356816000000002	2.9442304000000004
[H]C1N=C2C([H])=C([H])C(C3N=C(C4=C([H])N=C5C([H])=C([H])C([H])=C([H])N54)N([H])C=3C(F)(F)F)=C([H])N2C=1[H]	2.75891	5.7408769999999985	1.428652	5.773798069999999	0.61955984	2.8346953000000004
[H]C1=C([H])C(Cl)=C(C([H])=C1Cl)C1=C([H])C(=C(OC([H])([H])[H])C([H])=C1N([H])[H])C1=C([H])C(Cl)=C([H])C([H])=C1Cl	3.38805	5.907225	1.1616679999999997	5.92517475	0.37393455999999947	3.3568815
[H]C1=C([H])C(Cl)=C(C([H])=C1Cl)C1C([H])=C(C2=C([H])C(Cl)=C([H])C([H])=C2Cl)C(=C([H])C=1OC([H])([H])[H])N([H])[H]	3.41212	5.911137999999999	1.1676479999999998	5.92873558	0.37943616	3.3768596
[H]C1=NC(=C([H])S1)C1N=C(C2=NC([H])=C([H])S2)C([H])=C([H])C=1C([H])([H])[H]	3.06186	6.24256	1.888928	6.2303296	1.04301376	3.0861438000000003
[H]C1=NC(C2=NC(C3=NC([H])=C([H])S3)=C(C([H])=C2[H])C([H])([H])[H])=C([H])S1	3.0444299999999997	6.212439	1.813764	6.202919489999999	0.9738628799999995	3.0716769
[H]C1=NC([H])=C(C2=NN3C(=N2)C([H])=C(C2=NC([H])=C([H])C4=C([H])C([H])=C([H])C([H])=C24)C([H])=C3[H])C2=C([H])C([H])=C([H])C([H])=C12	3.01621	6.354217	2.077804	6.33193747	1.2167796800000001	3.0482543
[H]C1=NC([H])=C(C2=C([H])C3=NC(=NN3C([H])=C2[H])C2=NC([H])=C([H])C3=C([H])C([H])=C([H])C([H])=C23)C2=C([H])C([H])=C([H])C([H])=C12	2.9307199999999995	6.314814	2.16502	6.29608074	1.2970183999999998	2.9772976
[H]C1=C([H])C(C2C([H])=C([H])C(C3=C([H])C([H])=C(C(=C3[H])C([H])([H])N(C([H])([H])[H])C3([H])C([H])([H])C([H])([H])C([H])([H])C([H])([H])C3([H])[H])N([H])[H])=C(C=2Cl)C([H])([H])[H])=C(C(=C1[H])C([H])([H])N(C([H])([H])[H])C1([H])C([H])([H])C([H])([H])C([H])([H])C([H])([H])C1([H])[H])N([H])[H]	3.52085	5.9225129999999995	0.8899919999999995	5.939086829999999	0.1239926399999991	3.4671054999999997
[H]C1=C([H])C(C2C([H])=C([H])C(=C(Cl)C=2C([H])([H])[H])C2=C([H])C([H])=C(C(=C2[H])C([H])([H])N(C([H])([H])[H])C2([H])C([H])([H])C([H])([H])C([H])([H])C([H])([H])C2([H])[H])N([H])[H])=C(C(=C1[H])C([H])([H])N(C([H])([H])[H])C1([H])C([H])([H])C([H])([H])C([H])([H])C([H])([H])C1([H])[H])N([H])[H]	3.48267	5.881745	0.9001120000000001	5.90198795	0.13330303999999948	3.4354161000000003
[H]C1=NC2=C(C([H])=C([H])C(=C2C([H])=C1[H])C1C([H])=C([H])C([H])=C2C([H])=NN([H])C=12)C1C([H])=C([H])C([H])=C2C=1C([H])=NN2[H]	2.7995799999999997	5.9479929999999985	1.976052	5.9622736299999985	1.1231678399999998	2.8684513999999997
[H]C1=NC2=C(C([H])=C([H])C(=C2C([H])=C1[H])C1C([H])=C([H])C([H])=C2C=1C([H])=NN2[H])C1C([H])=C([H])C([H])=C2C([H])=NN([H])C=12	2.8278	5.916052	1.958112	5.933207319999999	1.10666304	2.891874
[H]C1C2=NC(=NN2C([H])=C(C=1[H])C1=C([H])C([H])=C2C(=C1[H])C([H])=C([H])N2[H])C1C([H])=C([H])C([H])=C2C([H])=C([H])N([H])C=12	3.3249699999999995	5.765083	1.1855879999999999	5.79582553	0.3959409599999999	3.3045250999999998
[H]C1C2=NC(=NN2C([H])=C(C=1[H])C1C([H])=C([H])C([H])=C2C([H])=C([H])N([H])C=12)C1=C([H])C([H])=C2C(=C1[H])C([H])=C([H])N2[H]	3.06186	5.749158	1.305924	5.781333780000001	0.50665008	3.0861438000000003
[H]C(=O)C1C([H])=C([H])C(=C([H])C=1C1C([H])=C([H])C([H])=C([H])C=1C(=O)C([H])([H])[H])C1C([H])=C([H])C(C(=O)C([H])([H])[H])=C([H])C=1[H]	2.8551900000000003	6.835242999999999	2.278916	6.769671129999999	1.40180272	2.9146077000000004
[H]C(=O)C1C([H])=C([H])C(=C([H])C=1C1C([H])=C([H])C(C(=O)C([H])([H])[H])=C([H])C=1[H])C1C([H])=C([H])C([H])=C([H])C=1C(=O)C([H])([H])[H]	2.8742799999999997	6.8251420000000005	2.366868	6.760479220000001	1.4827185600000004	2.9304524
[H]C1=NC(C2C([H])=C([H])C(C3=NC([H])=C(S3)C([H])([H])[H])=C([H])C=2OC([H])(F)F)=C(S1)C([H])([H])[H]	2.86681	6.008053	1.8524960000000004	6.01692823	1.0094963200000002	2.9242523
[H]C1=NC(C2C([H])=C([H])C(C3=NC([H])=C(S3)C([H])([H])[H])=C([H])C=2OC([H])(F)F)=C(S1)C([H])([H])[H]	2.9747099999999995	6.1174349999999995	1.834372	6.116465849999999	0.9928222399999997	3.0138092999999997
[H]C(=O)C1=C([H])C([H])=C(C([H])=O)C(=C1[H])C1N=C(C(=NC=1[H])C1C([H])=C(C([H])=O)C([H])=C([H])C=1C([H])=O)N([H])[H]	2.59291	6.526935	2.968732	6.489110849999999	2.03643344	2.6969153
[H]C(=O)C1=C([H])C([H])=C(C([H])=O)C(C2=NC([H])=C(N=C2N([H])[H])C2C([H])=C(C([H])=O)C([H])=C([H])C=2C([H])=O)=C1[H]	2.59457	6.4948120000000005	2.939476	6.45987892	2.00951792	2.6982931
[H]C1=C([H])C(=C(C([H])=C1C([H])([H])[H])C1C([H])=C(C([H])=C(F)C=1C([H])([H])[H])C1=C([H])C(=C([H])C([H])=C1C([H])([H])[H])C([H])([H])[H])C([H])([H])[H]	3.82546	6.507825	0.8383799999999999	6.471720750000001	0.07650959999999962	3.7199318000000003
[H]C1=C([H])C(=C(C([H])=C1C([H])([H])[H])C1C([H])=C(F)C(=C(C=1[H])C1=C([H])C(=C([H])C([H])=C1C([H])([H])[H])C([H])([H])[H])C([H])([H])[H])C([H])([H])[H]	3.80471	6.500818	0.8723280000000004	6.4653443799999994	0.10774176000000057	3.7027093000000004
[H]C1N=C(Cl)C(C2=C([H])N=C(C(C#N)=C2[H])C2=C([H])N=C(Cl)C([H])=C2N([H])[H])=C(C=1[H])N([H])[H]	3.22039	6.8270529999999985	2.111476	6.762218229999998	1.2477579199999997	3.2177237000000005
[H]C1N=C(Cl)C(C2=NC([H])=C(C([H])=C2C#N)C2=C([H])N=C(Cl)C([H])=C2N([H])[H])=C(C=1[H])N([H])[H]	2.95562	6.712301999999998	2.2352160000000003	6.657794819999999	1.36159872	2.9979646000000004
[H]C1C([H])=C(C(=C(C=1I)C1C([H])=C(C([H])=C(C=1N([H])[H])C([H])([H])[H])C1C([H])=C(C(=C([H])C=1I)[N+](=O)[O-])C([H])([H])[H])[N+](=O)[O-])C([H])([H])[H]	2.87511	6.009691	2.217184	6.01841881	1.3450092800000002	2.9311413
[H]C1C([H])=C(C(=C(C=1I)C1=C([H])C(C2C([H])=C(C(=C([H])C=2I)[N+](=O)[O-])C([H])([H])[H])=C(C(=C1[H])C([H])([H])[H])N([H])[H])[N+](=O)[O-])C([H])([H])[H]	2.66761	5.96683	2.316268	5.979415299999999	1.4361665600000002	2.7589163
[H]C(=O)C1C([H])=C([H])C(=NC=1C1C([H])=C([H])C([H])=C(OC([H])([H])[H])C=1[H])C1C([H])=C([H])C([H])=C([H])C=1OC([H])([H])[H]	2.8825800000000004	6.468786	2.46218	6.43619526	1.5704056	2.9373414
[H]C(=O)C1C([H])=C([H])C(=NC=1C1C([H])=C([H])C([H])=C([H])C=1OC([H])([H])[H])C1C([H])=C([H])C([H])=C(OC([H])([H])[H])C=1[H]	2.9672400000000003	6.437118	2.463836	6.40737738	1.57192912	3.0076092000000005
[truncated: 46,092 more rows]
